# Supplementary material
Source: PubMed Central journal article supplement (PMC4076396)
Supplement: supp_113.110403_110403SupTabS1.pdf [file supp_113.110403_110403SupTabS1.pdf]

**Supplemental Table S1.** List of genes (including 2kb 5' and 3' to the gene) with a greater amount (measured in base pairs) of HEE DHS than all five background cell types DHS combined.

| Gene Name | Gene RefSeq  | Gene Chrom | Gene Strand | Start Minus 2kbp | Stop Plus 2kbp | Epid34 DHS coverage(bp) | Background DHS coverage(bp) | Expression Value |
|-----------|--------------|------------|-------------|------------------|----------------|-------------------------|-----------------------------|------------------|
| SPP1      | NM_001040060 | chr4       | +           | 88894800         | 88906564       | 1295                    | 684                         | 15.31562         |
| MMP7      | NM_002423    | chr11      | -           | 102389237        | 102403479      | 760                     | 579                         | 15.10625333      |
| EFEMP1    | NM_004105    | chr2       | -           | 56091100         | 56152357       | 2038                    | 2036                        | 14.78808667      |
| PABPC3    | NM_030979    | chr13      | +           | 25668274         | 25674705       | 524                     | 244                         | 14.67791         |
| PON2      | NM_001018161 | chr7       | -           | 95032172         | 95066385       | 1421                    | 1284                        | 14.43800333      |
| NBPF9     | NM_001037675 | chr1       | +           | 144612957        | 144830811      | 1178                    | 1106                        | 14.43445         |
| HNRNPC    | NM_031314    | chr14      | -           | 21675294         | 21739639       | 1391                    | 1085                        | 14.39878667      |
| CFI       | NM_000204    | chr4       | -           | 110659846        | 110725336      | 577                     | 303                         | 14.39341333      |
| APEH      | NM_001640    | chr3       | +           | 49709433         | 49722935       | 2555                    | 2521                        | 14.37357         |
| SLC34A2   | NM_006424    | chr4       | +           | 25655433         | 25682369       | 3887                    | 2622                        | 14.28186333      |
| SDCBP     | NM_005625    | chr8       | +           | 59463726         | 59497420       | 2020                    | 1788                        | 14.26345333      |
| CNDP2     | NM_018235    | chr18      | +           | 72161498         | 72192690       | 4000                    | 3578                        | 14.15377667      |
| LUM       | NM_002345    | chr12      | -           | 91495230         | 91507543       | 675                     | 0                           | 14.14639         |
| CLDND1    | NM_019895    | chr3       | -           | 98232315         | 98243911       | 1306                    | 1266                        | 14.01781667      |
| MGST3     | NM_004528    | chr1       | +           | 165598448        | 165626856      | 2376                    | 2300                        | 14.01042333      |
| CXCL5     | NM_002994    | chr4       | -           | 74859357         | 74866417       | 752                     | 650                         | 14.00936667      |
| PSMB1     | NM_002793    | chr6       | -           | 170842202        | 170864418      | 1652                    | 1429                        | 14.00592         |
| SERPINA1  | NM_001127707 | chr14      | -           | 94841082         | 94859030       | 2477                    | 2242                        | 13.96405         |
| DHX9      | NM_001357    | chr1       | +           | 182806437        | 182859118      | 1849                    | 1740                        | 13.95021         |
| PCSK5     | NM_006200    | chr9       | +           | 78503558         | 78810347       | 8493                    | 5287                        | 13.94123667      |
| SLPI      | NM_003064    | chr20      | -           | 43878877         | 43885207       | 896                     | 542                         | 13.93328333      |

|        |           |       |   |           |           |       |       |             |
|--------|-----------|-------|---|-----------|-----------|-------|-------|-------------|
| IDH1   | NM_005896 | chr2  | - | 209098951 | 209121807 | 1993  | 1831  | 13.93305333 |
| MGST1  | NM_145792 | chr12 | + | 16498074  | 16519345  | 1735  | 1363  | 13.92062667 |
| RBMX   | NM_002139 | chrX  | - | 135953604 | 135964940 | 1022  | 936   | 13.89907667 |
| PAM    | NM_138822 | chr5  | + | 102199525 | 102368809 | 2190  | 1417  | 13.89734667 |
| FXR1   | NM_005087 | chr3  | + | 180628232 | 180702540 | 2083  | 1390  | 13.86024667 |
| MECOM  | NM_005241 | chr3  | - | 168799285 | 168866094 | 3374  | 2761  | 13.84218667 |
| TFPI2  | NM_006528 | chr7  | - | 93513743  | 93522066  | 1357  | 1086  | 13.84152    |
| COX7C  | NM_001867 | chr5  | + | 85911782  | 85918584  | 1027  | 949   | 13.82769    |
| RRAGA  | NM_006570 | chr9  | + | 19047370  | 19053022  | 1298  | 1222  | 13.78594667 |
| NUS1   | NM_138459 | chr6  | + | 117994615 | 118033887 | 1250  | 1250  | 13.77609667 |
| ESD    | NM_001984 | chr13 | - | 47343389  | 47373368  | 1562  | 1192  | 13.69275667 |
| PTPRM  | NM_002845 | chr18 | + | 7565312   | 8408860   | 18643 | 18642 | 13.65163667 |
| CCNG1  | NM_199246 | chr5  | + | 162862575 | 162874023 | 1348  | 1149  | 13.63533667 |
| PAPSS1 | NM_005443 | chr4  | - | 108532820 | 108643420 | 3243  | 3236  | 13.62608333 |
| STRAP  | NM_007178 | chr12 | + | 16033286  | 16058411  | 1119  | 1088  | 13.59099333 |
| ITGB8  | NM_002214 | chr7  | + | 20368723  | 20457383  | 4414  | 3247  | 13.58012    |
| BUB3   | NM_004725 | chr10 | + | 124911758 | 124926887 | 1634  | 1503  | 13.56413667 |
| ATIC   | NM_004044 | chr2  | + | 216174677 | 216216497 | 1418  | 1088  | 13.55137    |
| DSG2   | NM_001943 | chr18 | + | 29076025  | 29130815  | 3267  | 2854  | 13.53777333 |
| FAN1   | NM_014967 | chr15 | + | 31194074  | 31237311  | 2485  | 1766  | 13.53539333 |
| IL8    | NM_000584 | chr4  | + | 74604273  | 74611434  | 360   | 348   | 13.52494333 |
| SC4MOL | NM_006745 | chr4  | + | 166246816 | 166266226 | 1513  | 1427  | 13.50223667 |
| PLRG1  | NM_002669 | chr4  | - | 155455660 | 155473524 | 1177  | 903   | 13.44799    |
| CTSC   | NM_148170 | chr11 | - | 88051979  | 88072942  | 1773  | 1707  | 13.41631667 |

|          |              |       |   |           |           |       |       |             |
|----------|--------------|-------|---|-----------|-----------|-------|-------|-------------|
| LMBRD1   | NM_018368    | chr6  | - | 70383639  | 70509050  | 2140  | 1779  | 13.40866667 |
| PPP2CB   | NM_001009552 | chr8  | - | 30641124  | 30672353  | 2080  | 1991  | 13.39413667 |
| GSS      | NM_000178    | chr20 | - | 33514234  | 33545602  | 2593  | 2411  | 13.38384    |
| DCDC2    | NM_016356    | chr6  | - | 24169981  | 24360281  | 6436  | 4101  | 13.32556333 |
| ARL2BP   | NM_012106    | chr16 | + | 57277036  | 57289546  | 1851  | 1773  | 13.3255     |
| UGT1A1   | NM_000463    | chr2  | + | 234666917 | 234683946 | 166   | 156   | 13.31664667 |
| PSMA4    | NM_002789    | chr15 | + | 78830745  | 78843564  | 1069  | 966   | 13.31300333 |
| GALNT14  | NM_024572    | chr2  | - | 31131331  | 31363572  | 11055 | 10217 | 13.29403    |
| STARD3NL | NM_032016    | chr7  | + | 38215931  | 38272271  | 3845  | 2466  | 13.28636667 |
| RBP1     | NM_002899    | chr3  | - | 139234274 | 139260672 | 3553  | 2789  | 13.26728667 |
| CA2      | NM_000067    | chr8  | + | 86374129  | 86395722  | 1706  | 1438  | 13.23236    |
| SNURF    | NM_022804    | chr15 | + | 25198068  | 25215977  | 1386  | 1285  | 13.23075    |
| TOM1L1   | NM_005486    | chr17 | + | 52976050  | 53041329  | 2983  | 2824  | 13.23029333 |
| MPZL2    | NM_144765    | chr11 | - | 118125626 | 118137252 | 1279  | 581   | 13.22402    |
| CXCL1    | NM_001511    | chr4  | + | 74733107  | 74738956  | 2082  | 1836  | 13.21966333 |
| LYPD1    | NM_144586    | chr2  | - | 133400335 | 133430482 | 3353  | 2802  | 13.21647    |
| YTHDC1   | NM_133370    | chr4  | - | 69174103  | 69217825  | 1339  | 1084  | 13.18628333 |
| SCEL     | NM_144777    | chr13 | + | 78107807  | 78221399  | 1602  | 1002  | 13.17517    |
| MMADHC   | NM_015702    | chr2  | - | 150424145 | 150446331 | 921   | 917   | 13.17244667 |
| SRP54    | NM_003136    | chr14 | + | 35450102  | 35500774  | 1126  | 1119  | 13.16236333 |
| TPR      | NM_003292    | chr1  | - | 186278784 | 186346458 | 1915  | 1652  | 13.15271333 |
| CDH2     | NM_001792    | chr18 | - | 25528928  | 25759446  | 8356  | 5038  | 13.15203667 |
| PICALM   | NM_007166    | chr11 | - | 85666483  | 85782109  | 2475  | 2389  | 13.14395333 |
| API5     | NM_006595    | chr11 | + | 43331503  | 43368081  | 1898  | 1324  | 13.13356667 |

|          |           |       |   |           |           |       |      |             |
|----------|-----------|-------|---|-----------|-----------|-------|------|-------------|
| GPR39    | NM_001508 | chr2  | + | 133172145 | 133406170 | 8279  | 5673 | 13.12276333 |
| NDUFA12  | NM_018838 | chr12 | - | 95363108  | 95399512  | 2403  | 1716 | 13.11502    |
| SUCLA2   | NM_003850 | chr13 | - | 48514789  | 48577463  | 1410  | 1275 | 13.09896667 |
| ADAMTS1  | NM_006988 | chr21 | - | 28206604  | 28219729  | 5127  | 4382 | 13.03184333 |
| GOLM1    | NM_177937 | chr9  | - | 88639056  | 88717117  | 4157  | 4065 | 13.02910333 |
| JKAMP    | NM_016475 | chr14 | + | 59949159  | 59974082  | 1929  | 1472 | 13.02374    |
| TSC22D1  | NM_183422 | chr13 | - | 45005653  | 45152702  | 6388  | 6221 | 13.01578667 |
| PARL     | NM_018622 | chr3  | - | 183545171 | 183604694 | 1651  | 1624 | 13.00689    |
| PDZK1IP1 | NM_005764 | chr1  | - | 47647259  | 47657772  | 3787  | 3371 | 13.00285333 |
| SLC6A8   | NM_005629 | chrX  | + | 152951750 | 152964049 | 5518  | 4902 | 12.99914667 |
| PLOD2    | NM_182943 | chr3  | - | 145785226 | 145881283 | 3006  | 2848 | 12.93156667 |
| C5orf13  | NM_004772 | chr5  | - | 111062998 | 111094946 | 2778  | 2772 | 12.93023333 |
| LIMCH1   | NM_014988 | chr4  | + | 41360802  | 41704062  | 12495 | 7867 | 12.92734333 |
| GTF2H2   | NM_001515 | chr5  | - | 70328949  | 70365498  | 434   | 206  | 12.91038333 |
| HSPB8    | NM_014365 | chr12 | + | 119614593 | 119634552 | 4341  | 3220 | 12.91033333 |
| SERINC1  | NM_020755 | chr6  | - | 122762491 | 122794953 | 823   | 752  | 12.90449333 |
| F8A1     | NM_012151 | chrX  | + | 154112633 | 154118337 | 1070  | 0    | 12.90137    |
| PDE4D    | NM_006203 | chr5  | - | 58262864  | 58884325  | 13146 | 9354 | 12.89957667 |
| PSMD10   | NM_170750 | chrX  | - | 107325435 | 107336849 | 1450  | 1444 | 12.89826333 |
| HSPH1    | NM_006644 | chr13 | - | 31708761  | 31738118  | 1885  | 1774 | 12.88920333 |
| NBPF11   | NM_183372 | chr1  | - | 146030540 | 146084634 | 735   | 357  | 12.88478667 |
| RGPD5    | NM_032260 | chr2  | + | 110548333 | 110592597 | 486   | 476  | 12.87046    |
| COPS2    | NM_004236 | chr15 | - | 49415469  | 49449855  | 1525  | 1249 | 12.86908333 |
| STAG3L1  | NM_018991 | chr7  | + | 74986445  | 74998991  | 733   | 267  | 12.84695667 |

|          |              |       |   |           |           |      |      |             |
|----------|--------------|-------|---|-----------|-----------|------|------|-------------|
| BTBD10   | NM_032320    | chr11 | - | 13407554  | 13486839  | 2550 | 2478 | 12.81099    |
| HGD      | NM_000187    | chr3  | - | 120345013 | 120403419 | 1416 | 1335 | 12.79418    |
| NEO1     | NM_002499    | chr15 | + | 73342823  | 73599548  | 6214 | 6153 | 12.78349333 |
| KIAA0196 | NM_014846    | chr8  | - | 126034501 | 126106062 | 1948 | 1931 | 12.77622    |
| FAM48A   | NM_017569    | chr13 | - | 37581449  | 37635851  | 1189 | 1135 | 12.77184    |
| SNRPB2   | NM_198220    | chr20 | + | 16708607  | 16724418  | 976  | 941  | 12.76326    |
| SESTD1   | NM_178123    | chr2  | - | 179964417 | 180131351 | 3509 | 3175 | 12.75868333 |
| ITFG1    | NM_030790    | chr16 | - | 47187296  | 47497016  | 3230 | 2747 | 12.75200667 |
| MPHOSPH8 | NM_017520    | chr13 | + | 20205786  | 20249600  | 1428 | 1375 | 12.69814    |
| STAG3L2  | NM_001025202 | chr7  | - | 74297281  | 74308732  | 1076 | 0    | 12.67779    |
| SLC7A2   | NM_003046    | chr8  | + | 17394284  | 17430078  | 499  | 0    | 12.67655    |
| STAG3L3  | NM_001013739 | chr7  | - | 72467025  | 72478456  | 1080 | 188  | 12.67651333 |
| HIF1AN   | NM_017902    | chr10 | + | 102293639 | 102315682 | 1118 | 930  | 12.6684     |
| METTL5   | NM_014168    | chr2  | - | 170666266 | 170683354 | 1406 | 1406 | 12.65131667 |
| ARMCX3   | NM_177948    | chrX  | + | 100876349 | 100884832 | 1206 | 703  | 12.64878667 |
| HMGN3    | NM_138730    | chr6  | - | 79908960  | 79946456  | 1471 | 1358 | 12.63577333 |
| INTS10   | NM_018142    | chr8  | + | 19672916  | 19711587  | 2145 | 2124 | 12.63421    |
| DNM1L    | NM_012063    | chr12 | + | 32830135  | 32900585  | 1371 | 1291 | 12.62181667 |
| 10-Sep   | NM_178584    | chr2  | - | 110298374 | 110373784 | 4021 | 3990 | 12.61254333 |
| GLIPR1   | NM_006851    | chr12 | + | 75872511  | 75897717  | 1451 | 1163 | 12.58948333 |
| RDH10    | NM_172037    | chr8  | + | 74205263  | 74239517  | 4320 | 4279 | 12.58934667 |
| PIGK     | NM_005482    | chr1  | - | 77552665  | 77687133  | 1274 | 1256 | 12.56511    |
| THY1     | NM_006288    | chr11 | - | 119286653 | 119296247 | 3267 | 2931 | 12.54076667 |
| CCNG2    | NM_004354    | chr4  | + | 78076355  | 78093214  | 2343 | 2120 | 12.53879667 |

|        |              |       |   |           |           |      |      |             |
|--------|--------------|-------|---|-----------|-----------|------|------|-------------|
| TMED7  | NM_181836    | chr5  | - | 114946903 | 114963877 | 1182 | 1177 | 12.53711333 |
| SGPP2  | NM_152386    | chr2  | + | 223287320 | 223425618 | 5418 | 5073 | 12.51367333 |
| ERH    | NM_004450    | chr14 | - | 69844838  | 69867022  | 1311 | 1210 | 12.49809333 |
| PDPN   | NM_198389    | chr1  | + | 13908250  | 13946453  | 3117 | 2626 | 12.48838667 |
| ATF5   | NM_012068    | chr19 | + | 50429957  | 50439194  | 2446 | 2422 | 12.48236667 |
| BLMH   | NM_000386    | chr17 | - | 28573221  | 28621075  | 2036 | 1989 | 12.47401333 |
| KCNJ15 | NM_170737    | chr21 | + | 39642427  | 39675747  | 2049 | 1776 | 12.45815333 |
| WDR11  | NM_018117    | chr10 | + | 122608685 | 122671039 | 840  | 808  | 12.45783    |
| FZD6   | NM_003506    | chr8  | + | 104309057 | 104347095 | 1441 | 1435 | 12.45606333 |
| PLAA   | NM_001031689 | chr9  | - | 26901366  | 26949469  | 1275 | 1051 | 12.44619    |
| KDM5A  | NM_001042603 | chr12 | - | 387221    | 500621    | 1754 | 1610 | 12.43652    |
| UFM1   | NM_016617    | chr13 | + | 38921940  | 38939144  | 1762 | 1402 | 12.42937    |
| GNG11  | NM_004126    | chr7  | + | 93549014  | 93557827  | 854  | 610  | 12.41454667 |
| PTPRD  | NM_130393    | chr9  | - | 8312244   | 8735947   | 4615 | 1336 | 12.39274667 |
| ADH5   | NM_000671    | chr4  | - | 99990128  | 100011932 | 1454 | 1313 | 12.38376333 |
| CASP6  | NM_032992    | chr4  | - | 110607783 | 110626630 | 1638 | 1514 | 12.37953667 |
| MOCS2  | NM_176806    | chr5  | - | 52391893  | 52407599  | 1848 | 1091 | 12.35737    |
| FAM86C | NM_152563    | chr11 | + | 71496555  | 71514281  | 1978 | 1943 | 12.35055667 |
| SSFA2  | NM_006751    | chr2  | + | 182754470 | 182797465 | 1703 | 1568 | 12.34941333 |
| CDH6   | NM_004932    | chr5  | + | 31191794  | 31327238  | 3902 | 2515 | 12.34425333 |
| LRIG3  | NM_153377    | chr12 | - | 59263935  | 59316263  | 2912 | 2856 | 12.34270333 |
| MRPS30 | NM_016640    | chr5  | + | 44807025  | 44817619  | 1497 | 1495 | 12.34230667 |
| DHX36  | NM_020865    | chr3  | - | 153991455 | 154044287 | 1077 | 894  | 12.34009333 |
| HEATR1 | NM_018072    | chr1  | - | 236710303 | 236769842 | 1196 | 1041 | 12.33025    |

|          |              |       |   |           |           |       |       |             |
|----------|--------------|-------|---|-----------|-----------|-------|-------|-------------|
| PTPRK    | NM_002844    | chr6  | - | 128287922 | 128843820 | 6739  | 5612  | 12.32358333 |
| GFM2     | NM_170691    | chr5  | - | 74015029  | 74065043  | 1653  | 1470  | 12.32118333 |
| IER3IP1  | NM_016097    | chr18 | - | 44679411  | 44704746  | 2061  | 1617  | 12.31664667 |
| FHOD3    | NM_025135    | chr18 | + | 33875700  | 34362019  | 26209 | 25267 | 12.31550667 |
| GJA1     | NM_000165    | chr6  | + | 121754743 | 121772874 | 1927  | 855   | 12.31350667 |
| TMEM47   | NM_031442    | chrX  | - | 34643179  | 34677406  | 2005  | 1919  | 12.30862667 |
| RND3     | NM_005168    | chr2  | - | 151322708 | 151346181 | 3394  | 2042  | 12.30081333 |
| SHISA2   | NM_001007538 | chr13 | - | 26616733  | 26627199  | 3174  | 3144  | 12.29960667 |
| SLC35F2  | NM_017515    | chr11 | - | 107659715 | 107731915 | 3562  | 3315  | 12.28929333 |
| KIAA0020 | NM_014878    | chr9  | - | 2802153   | 2846131   | 2686  | 2081  | 12.27362    |
| ST8SIA2  | NM_006011    | chr15 | + | 92935138  | 93013959  | 5941  | 4460  | 12.25886    |
| NUPL1    | NM_014089    | chr13 | + | 25873664  | 25918562  | 1156  | 1021  | 12.24987667 |
| TCEAL3   | NM_032926    | chrX  | + | 102860832 | 102866856 | 1429  | 1073  | 12.24000333 |
| ABCD3    | NM_002858    | chr1  | + | 94881931  | 94986220  | 2131  | 1999  | 12.23961667 |
| COMMD6   | NM_203497    | chr13 | - | 76097348  | 76113992  | 1001  | 980   | 12.22949333 |
| DIRAS3   | NM_004675    | chr1  | - | 68509643  | 68518461  | 1385  | 1092  | 12.21181667 |
| GNPNAT1  | NM_198066    | chr14 | - | 53239909  | 53260387  | 1292  | 1254  | 12.20877333 |
| CDK13    | NM_031267    | chr7  | + | 39987957  | 40138734  | 4203  | 4043  | 12.20332    |
| UGT2B15  | NM_001076    | chr4  | - | 69510313  | 69538375  | 172   | 0     | 12.19812333 |
| WDR12    | NM_018256    | chr2  | - | 203743321 | 203778950 | 1954  | 1910  | 12.19458667 |
| PKN2     | NM_006256    | chr1  | + | 89147920  | 89303939  | 3366  | 3207  | 12.18711667 |
| RUSC2    | NM_014806    | chr9  | + | 35488005  | 35563896  | 7134  | 5894  | 12.18598333 |
| RAP1GDS1 | NM_021159    | chr4  | + | 99180525  | 99367013  | 3881  | 3718  | 12.18469667 |
| UBE3A    | NM_130839    | chr15 | - | 25580394  | 25686129  | 2433  | 2338  | 12.16936    |

|         |              |       |   |           |           |       |       |             |
|---------|--------------|-------|---|-----------|-----------|-------|-------|-------------|
| RAB32   | NM_006834    | chr6  | + | 146862826 | 146878087 | 2373  | 2182  | 12.16122    |
| ZNF277  | NM_021994    | chr7  | + | 111844641 | 111985990 | 3256  | 2876  | 12.13605    |
| MCTP2   | NM_018349    | chr15 | + | 94839428  | 95029182  | 2201  | 2036  | 12.13400333 |
| PDCD5   | NM_004708    | chr19 | + | 33070102  | 33080330  | 1546  | 1426  | 12.11428    |
| TMX4    | NM_021156    | chr20 | - | 7959714   | 8002394   | 2530  | 1880  | 12.10581667 |
| DERA    | NM_015954    | chr12 | + | 16062184  | 16192316  | 4324  | 2777  | 12.10322667 |
| CFTR    | NM_000492    | chr7  | + | 117118015 | 117310719 | 1758  | 1462  | 12.08874    |
| LRRC16A | NM_017640    | chr6  | + | 25277654  | 25622759  | 9263  | 8903  | 12.07948333 |
| TBC1D3C | NM_001001418 | chr17 | - | 34744117  | 34810092  | 146   | 0     | 12.07351333 |
| ZNF83   | NM_018300    | chr19 | - | 53113616  | 53143645  | 1605  | 1422  | 12.07035    |
| COL4A4  | NM_000092    | chr2  | - | 227865425 | 228031276 | 4801  | 4312  | 12.06538667 |
| GCNT3   | NM_004751    | chr15 | + | 59901980  | 59914211  | 1413  | 1174  | 12.06383667 |
| HOOK1   | NM_015888    | chr1  | + | 60278531  | 60344051  | 1881  | 1686  | 12.05523333 |
| F8A2    | NM_001007523 | chrX  | + | 154112648 | 154117766 | 1070  | 0     | 12.05106    |
| KLHDC2  | NM_014315    | chr14 | + | 50232785  | 50251857  | 2159  | 2039  | 12.04757    |
| ZWINT   | NM_032997    | chr10 | - | 58115197  | 58123035  | 744   | 658   | 12.04629333 |
| STK32B  | NM_018401    | chr4  | + | 5051525   | 5504726   | 11797 | 10906 | 12.04489    |
| THOC2   | NM_001081550 | chrX  | - | 122732410 | 122868905 | 2805  | 2374  | 12.01738    |
| GUCY1B3 | NM_000857    | chr4  | + | 156678124 | 156730784 | 2674  | 2044  | 12.01625    |
| HBP1    | NM_012257    | chr7  | + | 106807458 | 106844975 | 2953  | 2806  | 12.01144667 |
| NEFL    | NM_006158    | chr8  | - | 24806467  | 24816132  | 1856  | 679   | 12.00451667 |
| SLC35B3 | NM_015948    | chr6  | - | 8411299   | 8437795   | 1554  | 1032  | 11.99172333 |
| TAB2    | NM_015093    | chr6  | + | 149637434 | 149734748 | 2429  | 2241  | 11.98417333 |
| NCALD   | NM_032041    | chr8  | - | 102696768 | 102805440 | 3734  | 3466  | 11.98361667 |



|          |              |       |   |           |           |      |      |             |
|----------|--------------|-------|---|-----------|-----------|------|------|-------------|
| USP38    | NM_032557    | chr4  | + | 144104068 | 144145142 | 1171 | 1000 | 11.95469333 |
| UBQLN2   | NM_013444    | chrX  | + | 56588024  | 56595444  | 2122 | 1923 | 11.92732667 |
| CCL2     | NM_002982    | chr17 | + | 32580294  | 32586221  | 1235 | 776  | 11.92628    |
| UGT2B4   | NM_021139    | chr4  | - | 70343881  | 70363627  | 485  | 0    | 11.92305    |
| H2AFJ    | NM_177925    | chr12 | + | 14925268  | 14932937  | 1854 | 1096 | 11.92128333 |
| C12orf11 | NM_018164    | chr12 | - | 27056110  | 27093255  | 1331 | 1326 | 11.91927    |
| ARMC10   | NM_031905    | chr7  | + | 102713326 | 102742206 | 1898 | 1831 | 11.91748667 |
| GPR126   | NM_198569    | chr6  | + | 142621054 | 142769404 | 4782 | 3532 | 11.914      |
| SMG1     | NM_015092    | chr16 | - | 18814173  | 18939727  | 1232 | 993  | 11.90554667 |
| CXCL6    | NM_002993    | chr4  | + | 74700271  | 74706478  | 801  | 160  | 11.89899333 |
| NUP37    | NM_024057    | chr12 | - | 102465971 | 102514362 | 784  | 746  | 11.8971     |
| SIPA1L2  | NM_020808    | chr1  | - | 232531710 | 232653244 | 4517 | 1428 | 11.85162667 |
| RASSF6   | NM_201431    | chr4  | - | 74436860  | 74488341  | 2821 | 2698 | 11.84747333 |
| LDOC1    | NM_012317    | chrX  | - | 140267929 | 140273311 | 1604 | 1291 | 11.83592667 |
| CDK1     | NM_033379    | chr10 | + | 62536210  | 62556611  | 1063 | 1052 | 11.82769667 |
| EPB41L4A | NM_022140    | chr5  | - | 111496313 | 111757011 | 8611 | 7377 | 11.82413667 |
| SLC35A5  | NM_017945    | chr3  | + | 112278893 | 112305004 | 1769 | 1649 | 11.81831667 |
| KCNK1    | NM_002245    | chr1  | + | 233747748 | 233810259 | 5572 | 5559 | 11.81811333 |
| PRRG1    | NM_001173490 | chrX  | + | 37206581  | 37318549  | 2946 | 2725 | 11.81093333 |
| PRPF38A  | NM_032864    | chr1  | + | 52868217  | 52885993  | 1565 | 1513 | 11.80767667 |
| PSD3     | NM_206909    | chr8  | - | 18382811  | 18668406  | 6110 | 5001 | 11.80005333 |
| TXNDC9   | NM_005783    | chr2  | - | 99933485  | 99954861  | 1934 | 1630 | 11.78905    |
| SC5DL    | NM_006918    | chr11 | + | 121161386 | 121186120 | 1817 | 1745 | 11.77519    |
| NBN      | NM_002485    | chr8  | - | 90943562  | 90998900  | 1872 | 1003 | 11.77346333 |

|           |           |       |   |           |           |       |       |             |
|-----------|-----------|-------|---|-----------|-----------|-------|-------|-------------|
| TRHDE     | NM_013381 | chr12 | + | 72664527  | 73061423  | 4814  | 3706  | 11.76718667 |
| HPS3      | NM_032383 | chr3  | + | 148845369 | 148893306 | 2169  | 1769  | 11.76647333 |
| FZD1      | NM_003505 | chr7  | + | 90891781  | 90900133  | 3983  | 3197  | 11.75897667 |
| FLRT3     | NM_198391 | chr20 | - | 14302637  | 14320314  | 750   | 750   | 11.75687667 |
| PCM1      | NM_006197 | chr8  | + | 17778364  | 17889458  | 2026  | 1868  | 11.75633    |
| HSPA2     | NM_021979 | chr14 | + | 65005184  | 65011955  | 1924  | 1510  | 11.75348667 |
| EDIL3     | NM_005711 | chr5  | - | 83236124  | 83682612  | 2614  | 2391  | 11.744      |
| PTHLH     | NM_198966 | chr12 | - | 28109015  | 28124895  | 3261  | 2654  | 11.73952333 |
| MACC1     | NM_182762 | chr7  | - | 20172277  | 20259014  | 1892  | 1702  | 11.73704    |
| ZSWIM6    | NM_020928 | chr5  | + | 60626098  | 60844000  | 6799  | 6216  | 11.72610667 |
| CCNC      | NM_005190 | chr6  | - | 99988261  | 100018691 | 1042  | 942   | 11.72589    |
| SPOCK1    | NM_004598 | chr5  | - | 136308985 | 136837019 | 21169 | 20811 | 11.72166    |
| EXOC1     | NM_178237 | chr4  | + | 56717814  | 56773245  | 1498  | 1471  | 11.70089333 |
| ETFDH     | NM_004453 | chr4  | + | 159591275 | 159631842 | 2067  | 2060  | 11.69390667 |
| FABP5     | NM_001444 | chr8  | + | 82190783  | 82199009  | 1556  | 1468  | 11.6792     |
| MINA      | NM_153182 | chr3  | - | 97658659  | 97693296  | 1963  | 1316  | 11.67571    |
| GIGYF2    | NM_015575 | chr2  | + | 233560013 | 233727290 | 4456  | 3976  | 11.67361667 |
| NUDT16    | NM_152395 | chr3  | + | 131098607 | 131109675 | 2029  | 1773  | 11.66349    |
| DCAF13    | NM_015420 | chr8  | + | 104424940 | 104457681 | 1285  | 1095  | 11.65314    |
| CGGBP1    | NM_003663 | chr3  | - | 88099098  | 88110147  | 1739  | 1601  | 11.65173667 |
| ARL1      | NM_001177 | chr12 | - | 101784913 | 101803573 | 1490  | 1371  | 11.64319    |
| NEDD1     | NM_152905 | chr12 | + | 97298999  | 97349470  | 1738  | 1685  | 11.63934667 |
| C14orf101 | NM_017799 | chr14 | + | 57044509  | 57118233  | 1619  | 1167  | 11.63282667 |
| DEPDC1    | NM_017779 | chr1  | - | 68937833  | 68964800  | 1040  | 979   | 11.63236667 |

|           |              |       |   |           |           |       |      |             |
|-----------|--------------|-------|---|-----------|-----------|-------|------|-------------|
| RAB11FIP2 | NM_014904    | chr10 | - | 119762425 | 119808115 | 2706  | 1688 | 11.60315333 |
| MRPL48    | NM_016055    | chr11 | + | 73496915  | 73577657  | 1578  | 1319 | 11.59085667 |
| KIAA2026  | NM_001017969 | chr9  | - | 5917006   | 6010004   | 2662  | 2437 | 11.56352    |
| PPARGC1A  | NM_013261    | chr4  | - | 23791642  | 23893701  | 3362  | 1964 | 11.55832667 |
| MFSD1     | NM_022736    | chr3  | + | 158517713 | 158549509 | 1711  | 1275 | 11.55478333 |
| COL12A1   | NM_080645    | chr6  | - | 75792040  | 75917624  | 5384  | 5060 | 11.54634    |
| CDC73     | NM_024529    | chr1  | + | 193089086 | 193225943 | 1577  | 1513 | 11.54109667 |
| KIAA1468  | NM_020854    | chr18 | + | 59852522  | 59976356  | 2434  | 1654 | 11.54071667 |
| GAR1      | NM_032993    | chr4  | + | 110734664 | 110747894 | 1185  | 954  | 11.53560667 |
| NUP50     | NM_153645    | chr22 | + | 45558550  | 45585891  | 2355  | 2301 | 11.53367333 |
| AK3       | NM_016282    | chr9  | - | 4709156   | 4743228   | 1685  | 1677 | 11.52997333 |
| CASP4     | NM_033306    | chr11 | - | 104811592 | 104829423 | 275   | 242  | 11.52310667 |
| GFRA1     | NM_145793    | chr10 | - | 117814440 | 118033820 | 11824 | 6845 | 11.51789333 |
| DIMT1L    | NM_014473    | chr5  | - | 61682349  | 61701729  | 1098  | 1049 | 11.51108    |
| ZC4H2     | NM_018684    | chrX  | - | 64134248  | 64198414  | 2281  | 2128 | 11.50773333 |
| PAPD4     | NM_173797    | chr5  | + | 78906241  | 78984472  | 1501  | 1123 | 11.49856667 |
| USP14     | NM_005151    | chr18 | + | 156481    | 215740    | 1549  | 1510 | 11.49659    |
| DDX18     | NM_006773    | chr2  | + | 118570253 | 118591954 | 1048  | 1032 | 11.49288667 |
| NRG1      | NM_013964    | chr8  | + | 32403726  | 32624559  | 6195  | 5591 | 11.48789333 |
| C8orf84   | NM_153225    | chr8  | - | 73974776  | 74007508  | 1421  | 1302 | 11.48747667 |
| PPAPDC1A  | NM_001030059 | chr10 | + | 122214464 | 122351368 | 9356  | 6171 | 11.48468667 |
| GDA       | NM_004293    | chr9  | + | 74762291  | 74869141  | 2678  | 1265 | 11.48084    |
| ARHGEF35  | NM_001003702 | chr7  | - | 143881174 | 143894792 | 337   | 0    | 11.47266333 |
| VWA5A     | NM_198315    | chr11 | + | 123984109 | 123997544 | 1653  | 1653 | 11.45647333 |

|           |              |       |   |           |           |       |       |             |
|-----------|--------------|-------|---|-----------|-----------|-------|-------|-------------|
| ARFIP1    | NM_014447    | chr4  | + | 153699110 | 153835064 | 2917  | 2336  | 11.45       |
| GRB14     | NM_004490    | chr2  | - | 165347321 | 165480361 | 3511  | 3450  | 11.44441667 |
| PYROXD1   | NM_024854    | chr12 | + | 21588536  | 21626183  | 1047  | 785   | 11.43846    |
| PPIL3     | NM_130906    | chr2  | - | 201733677 | 201755850 | 1217  | 1182  | 11.43693    |
| DCAF12L2  | NM_001013628 | chrX  | - | 125295480 | 125302081 | 1964  | 930   | 11.42758    |
| AKTIP     | NM_022476    | chr16 | - | 53523190  | 53539171  | 2267  | 2083  | 11.41648    |
| ERGIC2    | NM_016570    | chr12 | - | 29491577  | 29536144  | 1130  | 1092  | 11.40830333 |
| SOSTDC1   | NM_015464    | chr7  | - | 16499104  | 16507475  | 820   | 634   | 11.40014667 |
| AGPAT9    | NM_032717    | chr4  | + | 84455651  | 84529027  | 3818  | 3295  | 11.39611667 |
| C14orf149 | NM_144581    | chr14 | - | 59937404  | 59953074  | 2205  | 1414  | 11.38765333 |
| LRRN1     | NM_020873    | chr3  | + | 3839119   | 3891388   | 2991  | 1313  | 11.38233667 |
| ARHGAP11B | NM_001039841 | chr15 | + | 30916877  | 30933014  | 1713  | 1666  | 11.38069667 |
| FGA       | NM_021871    | chr4  | - | 155504427 | 155513898 | 378   | 337   | 11.37541667 |
| KIAA1804  | NM_032435    | chr1  | + | 233461512 | 233522895 | 3862  | 2053  | 11.36302667 |
| GCOM1     | NM_152451    | chr15 | + | 57882100  | 57979563  | 5061  | 4438  | 11.35022333 |
| HAVCR1    | NM_012206    | chr5  | - | 156454529 | 156487488 | 2292  | 629   | 11.3488     |
| MED6      | NM_005466    | chr14 | - | 71048955  | 71069385  | 1087  | 920   | 11.34776667 |
| UPRT      | NM_145052    | chrX  | + | 74491892  | 74526733  | 1257  | 1188  | 11.34657333 |
| MUDENG    | NM_018229    | chr14 | + | 57733604  | 57758798  | 1455  | 1324  | 11.34435333 |
| KIAA0776  | NM_015323    | chr6  | + | 96967700  | 97005152  | 1054  | 1037  | 11.34316    |
| C9orf116  | NM_144654    | chr9  | - | 138385024 | 138393762 | 2829  | 2635  | 11.32939    |
| PARP8     | NM_024615    | chr5  | + | 49960770  | 50144357  | 3774  | 2931  | 11.31364333 |
| KCNIP1    | NM_014592    | chr5  | + | 169929046 | 170165637 | 13192 | 12215 | 11.30984    |
| SDAD1     | NM_018115    | chr4  | - | 76869066  | 76914114  | 1735  | 1484  | 11.30594333 |

|          |              |       |   |           |           |       |       |             |
|----------|--------------|-------|---|-----------|-----------|-------|-------|-------------|
| ARHGAP24 | NM_031305    | chr4  | + | 86849424  | 86925824  | 2253  | 1218  | 11.28959667 |
| MAPKSP1  | NM_021970    | chr4  | - | 100797493 | 100817704 | 1038  | 897   | 11.28451    |
| KLHL14   | NM_020805    | chr18 | - | 30250632  | 30354975  | 5413  | 4823  | 11.27212667 |
| ZNF133   | NM_003434    | chr20 | + | 18267119  | 18299641  | 1908  | 1835  | 11.26831    |
| FGFBP1   | NM_005130    | chr4  | - | 15935191  | 15941972  | 533   | 0     | 11.26569    |
| CHIC2    | NM_012110    | chr4  | - | 54873956  | 54932789  | 1186  | 1174  | 11.25949333 |
| SIRPG    | NM_080816    | chr20 | - | 1607796   | 1640426   | 1290  | 1077  | 11.25712667 |
| CCNJ     | NM_019084    | chr10 | + | 97801157  | 97822626  | 1781  | 1657  | 11.25058667 |
| ZBED2    | NM_024508    | chr3  | - | 111309745 | 111316167 | 1528  | 235   | 11.2449     |
| MITF     | NM_198178    | chr3  | + | 69983749  | 70019489  | 549   | 424   | 11.23726333 |
| MCM8     | NM_182802    | chr20 | + | 5929296   | 5977832   | 2479  | 1719  | 11.23698    |
| KLHL9    | NM_018847    | chr9  | - | 21329016  | 21337430  | 1027  | 725   | 11.23282    |
| ELTD1    | NM_022159    | chr1  | - | 79353447  | 79474496  | 1191  | 697   | 11.21805667 |
| PARG     | NM_003631    | chr10 | - | 51024323  | 51373332  | 3003  | 1812  | 11.21621    |
| GPX8     | NM_001008397 | chr5  | + | 54453982  | 54465130  | 1051  | 851   | 11.20760667 |
| ATP8A2   | NM_016529    | chr13 | + | 25944207  | 26597421  | 16920 | 13213 | 11.20549    |
| NPY1R    | NM_000909    | chr4  | - | 164243115 | 164255749 | 2065  | 1623  | 11.20303333 |
| GAS1     | NM_002048    | chr9  | - | 89557275  | 89564105  | 3303  | 2944  | 11.20059    |
| CD200    | NM_005944    | chr3  | + | 112049914 | 112083659 | 999   | 296   | 11.19922333 |
| CCDC59   | NM_014167    | chr12 | - | 82744081  | 82754200  | 1248  | 966   | 11.19162667 |
| UNC80    | NM_182587    | chr2  | + | 210634715 | 210866025 | 2941  | 2240  | 11.19043333 |
| WFDC2    | NM_006103    | chr20 | + | 44096392  | 44112173  | 1725  | 1260  | 11.18562667 |
| GTF2E1   | NM_005513    | chr3  | + | 120459556 | 120503917 | 1788  | 1752  | 11.17516    |
| RNF128   | NM_194463    | chrX  | + | 105967892 | 106042247 | 2900  | 2147  | 11.17390333 |

|          |              |       |   |           |           |      |      |             |
|----------|--------------|-------|---|-----------|-----------|------|------|-------------|
| ZNF93    | NM_031218    | chr19 | + | 20009720  | 20048383  | 1779 | 1619 | 11.17142333 |
| PRR15    | NM_175887    | chr7  | + | 29601425  | 29608912  | 4046 | 3084 | 11.16858667 |
| INTS12   | NM_020395    | chr4  | - | 106601783 | 106631882 | 1154 | 1092 | 11.16671333 |
| CLDN10   | NM_182848    | chr13 | + | 96083851  | 96234011  | 6990 | 6641 | 11.16190333 |
| COMMD2   | NM_016094    | chr3  | - | 149454255 | 149472287 | 943  | 760  | 11.15752    |
| GPR110   | NM_153840    | chr6  | - | 46965811  | 47012083  | 1140 | 479  | 11.15692    |
| RASL11B  | NM_023940    | chr4  | + | 53726493  | 53735003  | 1949 | 1790 | 11.13235333 |
| TSPYL5   | NM_033512    | chr8  | - | 98283712  | 98292177  | 1225 | 986  | 11.13214667 |
| DYNC2LI1 | NM_016008    | chr2  | + | 43999176  | 44039150  | 1316 | 1305 | 11.13041667 |
| STC1     | NM_003155    | chr8  | - | 23697432  | 23714321  | 2413 | 2047 | 11.12587667 |
| HMGXB4   | NM_001003681 | chr22 | + | 35651443  | 35693801  | 1631 | 1479 | 11.11993667 |
| CAND1    | NM_018448    | chr12 | + | 67661059  | 67710389  | 2052 | 2005 | 11.11858    |
| TMEM106B | NM_018374    | chr7  | + | 12248846  | 12278891  | 1315 | 1064 | 11.10702    |
| CXCL3    | NM_002090    | chr4  | - | 74900310  | 74906491  | 1256 | 1220 | 11.10666667 |
| PLS1     | NM_002670    | chr3  | + | 142340264 | 142434506 | 1908 | 1285 | 11.09314    |
| VMA21    | NM_001017980 | chrX  | + | 150563655 | 150579837 | 2218 | 1847 | 11.08045667 |
| CDK20    | NM_178432    | chr9  | - | 90579357  | 90591696  | 1247 | 974  | 11.07255    |
| DZIP1    | NM_198968    | chr13 | - | 96228454  | 96298958  | 3803 | 3681 | 11.06840333 |
| PDE3A    | NM_000921    | chr12 | + | 20520195  | 20835882  | 5271 | 4810 | 11.06361333 |
| BHMT2    | NM_017614    | chr5  | + | 78363545  | 78387898  | 2075 | 1355 | 11.05905333 |
| LRRC40   | NM_017768    | chr1  | - | 70608483  | 70673362  | 1095 | 984  | 11.04136    |
| ZNF350   | NM_021632    | chr19 | - | 52465591  | 52492080  | 798  | 574  | 11.03117667 |
| KRT5     | NM_000424    | chr12 | - | 52906357  | 52916244  | 1136 | 0    | 11.02139667 |
| GPC4     | NM_001448    | chrX  | - | 132433062 | 132551206 | 6100 | 5906 | 11.01728667 |

|          |              |       |   |           |           |       |      |             |
|----------|--------------|-------|---|-----------|-----------|-------|------|-------------|
| TERF1    | NM_017489    | chr8  | + | 73919095  | 73961988  | 1601  | 1325 | 11.0138     |
| DDX60    | NM_017631    | chr4  | - | 169135440 | 169241959 | 1193  | 1134 | 11.01327    |
| EXTL2    | NM_001439    | chr1  | - | 101335939 | 101362419 | 2242  | 2143 | 11.01309333 |
| SUPT7L   | NM_014860    | chr2  | - | 27871677  | 27888450  | 1263  | 1247 | 11.00405    |
| DCAF12L1 | NM_178470    | chrX  | - | 125681364 | 125688843 | 2893  | 827  | 10.99159    |
| ZNF268   | NM_152943    | chr12 | + | 133755993 | 133785698 | 914   | 907  | 10.98835333 |
| KLHL8    | NM_020803    | chr4  | - | 88080212  | 88143675  | 1631  | 1411 | 10.98746    |
| RASEF    | NM_152573    | chr9  | - | 85595315  | 85680044  | 3885  | 2604 | 10.97708667 |
| PLXDC2   | NM_032812    | chr10 | + | 20103370  | 20571116  | 10517 | 4226 | 10.97394333 |
| ZXDA     | NM_007156    | chrX  | - | 57929862  | 57939068  | 1918  | 1629 | 10.97101667 |
| HRCT1    | NM_001039792 | chr9  | + | 35904187  | 35909139  | 3170  | 2900 | 10.96631667 |
| CACYBP   | NM_014412    | chr1  | + | 174966890 | 174983164 | 1784  | 1719 | 10.96576333 |
| CCNT2    | NM_058241    | chr2  | + | 135674391 | 135716585 | 1905  | 1786 | 10.96075    |
| LSM6     | NM_007080    | chr4  | + | 147094833 | 147113214 | 990   | 959  | 10.94801    |
| SOS2     | NM_006939    | chr14 | - | 50581844  | 50700100  | 3098  | 2936 | 10.94541667 |
| UGT2B7   | NM_001074    | chr4  | + | 69960191  | 69980706  | 470   | 0    | 10.94426667 |
| RNPC3    | NM_017619    | chr1  | + | 104066576 | 104099860 | 1250  | 1239 | 10.94241333 |
| SLC4A4   | NM_003759    | chr4  | + | 72202768  | 72439805  | 3356  | 2956 | 10.93077667 |
| NCAM1    | NM_181351    | chr11 | + | 112829993 | 113151159 | 7799  | 7162 | 10.92723    |
| EPS8     | NM_004447    | chr12 | - | 15771073  | 15944511  | 5673  | 5074 | 10.92216333 |
| GNG5     | NM_005274    | chr1  | - | 84962004  | 84974263  | 1523  | 1395 | 10.91883333 |
| ZZZ3     | NM_015534    | chr1  | - | 78028188  | 78150344  | 2358  | 2172 | 10.91756333 |
| PLBD1    | NM_024829    | chr12 | - | 14654595  | 14722792  | 2384  | 1378 | 10.91702    |
| LPHN3    | NM_015236    | chr4  | + | 62360837  | 62940169  | 3691  | 1264 | 10.91411333 |

|          |              |       |   |           |           |       |      |             |
|----------|--------------|-------|---|-----------|-----------|-------|------|-------------|
| LPHN2    | NM_012302    | chr1  | + | 82264080  | 82460108  | 4543  | 3570 | 10.91384    |
| B3GNT5   | NM_032047    | chr3  | + | 182969030 | 182993180 | 3226  | 3087 | 10.91195333 |
| CCDC14   | NM_022757    | chr3  | - | 123630272 | 123682256 | 1137  | 878  | 10.90704333 |
| HERC6    | NM_017912    | chr4  | + | 89297889  | 89366250  | 2085  | 2023 | 10.90218333 |
| CHD1     | NM_001270    | chr5  | - | 98188906  | 98264239  | 1125  | 1086 | 10.90196    |
| GINS1    | NM_021067    | chr20 | + | 25386321  | 25431192  | 1439  | 1436 | 10.89673667 |
| PIGN     | NM_176787    | chr18 | - | 59709456  | 59856290  | 2735  | 2430 | 10.89447667 |
| SELK     | NM_021237    | chr3  | - | 53917224  | 53927990  | 1376  | 1257 | 10.88521333 |
| TSPAN6   | NM_003270    | chrX  | - | 99881793  | 99893795  | 1261  | 1188 | 10.87950667 |
| BARD1    | NM_000465    | chr2  | - | 215591273 | 215676429 | 2442  | 2423 | 10.87420667 |
| C12orf35 | NM_018169    | chr12 | + | 32110351  | 32148044  | 2374  | 2342 | 10.85548    |
| ANXA8    | NM_001040084 | chr10 | + | 48253223  | 48273369  | 348   | 0    | 10.81976667 |
| FGF9     | NM_002010    | chr13 | + | 22243213  | 22280641  | 7568  | 7340 | 10.81442667 |
| SNCA     | NM_007308    | chr4  | - | 90643248  | 90760128  | 3901  | 3413 | 10.81252667 |
| GRIP1    | NM_021150    | chr12 | - | 66739209  | 67074926  | 4125  | 3865 | 10.80986    |
| ZNF763   | NM_001012753 | chr19 | + | 12073867  | 12093199  | 1620  | 1574 | 10.79593667 |
| FAM122B  | NM_145284    | chrX  | - | 133901594 | 133932386 | 1947  | 1534 | 10.79281333 |
| TMEM133  | NM_032021    | chr11 | + | 100860809 | 100866667 | 172   | 0    | 10.78722333 |
| SSTR1    | NM_001049    | chr14 | + | 38675202  | 38684269  | 3396  | 3307 | 10.78271667 |
| DNER     | NM_139072    | chr2  | - | 230220343 | 230581287 | 10578 | 7023 | 10.78213667 |
| C18orf55 | NM_014177    | chr18 | + | 71813744  | 71828205  | 1458  | 1325 | 10.76974667 |
| SLC3A1   | NM_000341    | chr2  | + | 44500595  | 44549963  | 1420  | 878  | 10.75729333 |
| CLEC4E   | NM_014358    | chr12 | - | 8683899   | 8695559   | 625   | 0    | 10.72959333 |
| PROM1    | NM_006017    | chr4  | - | 15967847  | 16079742  | 2697  | 1748 | 10.71245667 |



|          |              |       |   |           |           |       |       |             |
|----------|--------------|-------|---|-----------|-----------|-------|-------|-------------|
| WDR36    | NM_139281    | chr5  | + | 110425868 | 110468201 | 1191  | 872   | 10.69591667 |
| KIAA1217 | NM_019590    | chr10 | + | 24495718  | 24838773  | 17122 | 14401 | 10.69547333 |
| CCDC58   | NM_001017928 | chr3  | - | 122076434 | 122104075 | 2105  | 1940  | 10.69397333 |
| PKIA     | NM_181839    | chr8  | + | 79426334  | 79517486  | 1755  | 1566  | 10.69295    |
| WDR72    | NM_182758    | chr15 | - | 53803936  | 54053860  | 4033  | 911   | 10.69282    |
| ZNF254   | NM_203282    | chr19 | + | 24267974  | 24314655  | 925   | 898   | 10.69099333 |
| SLC29A4  | NM_153247    | chr7  | + | 5320559   | 5345705   | 6511  | 6310  | 10.68930667 |
| CTTNBP2  | NM_033427    | chr7  | - | 117348704 | 117515562 | 6944  | 6038  | 10.68846333 |
| INPP4B   | NM_003866    | chr4  | - | 142947180 | 143769605 | 10150 | 6166  | 10.6837     |
| RAP2C    | NM_021183    | chrX  | - | 131335051 | 131354190 | 2653  | 2208  | 10.67525667 |
| NHLRC3   | NM_001017370 | chr13 | + | 39610453  | 39626247  | 1142  | 1124  | 10.67385    |
| ALG13    | NM_018466    | chrX  | + | 110922344 | 110935624 | 1178  | 1167  | 10.67025333 |
| ANXA8L2  | NM_001630    | chr10 | + | 47744918  | 47765041  | 916   | 0     | 10.66552333 |
| C10orf57 | NM_025125    | chr10 | + | 81836424  | 81854308  | 1485  | 1245  | 10.6564     |
| TSPAN12  | NM_012338    | chr7  | - | 120425372 | 120500178 | 3765  | 2606  | 10.65367    |
| DAB2     | NM_001343    | chr5  | - | 39369778  | 39427336  | 2606  | 2502  | 10.65216    |
| MYSM1    | NM_001085487 | chr1  | - | 59123588  | 59167748  | 987   | 868   | 10.64717    |
| LPAR1    | NM_057159    | chr9  | - | 113634052 | 113802366 | 5697  | 4916  | 10.64475    |
| NDUFAF2  | NM_174889    | chr5  | + | 60238954  | 60450865  | 2997  | 2716  | 10.63148667 |
| PLK4     | NM_014264    | chr4  | + | 128800014 | 128822378 | 1247  | 1201  | 10.62907    |
| YARS2    | NM_001040436 | chr12 | - | 32897475  | 32910875  | 1669  | 1458  | 10.62639667 |
| ACMSD    | NM_138326    | chr2  | + | 135594184 | 135661603 | 1793  | 1026  | 10.61939333 |
| ACSM3    | NM_202000    | chr16 | + | 20773310  | 20799639  | 1316  | 1206  | 10.60905667 |
| VPS4B    | NM_004869    | chr18 | - | 61054423  | 61091753  | 1504  | 1503  | 10.60867667 |

|          |              |       |   |           |           |      |      |             |
|----------|--------------|-------|---|-----------|-----------|------|------|-------------|
| TNFAIP6  | NM_007115    | chr2  | + | 152212103 | 152238561 | 1927 | 1706 | 10.59460333 |
| DYNC2H1  | NM_001377    | chr11 | + | 102978158 | 103352592 | 2548 | 1823 | 10.59105    |
| DPH5     | NM_015958    | chr1  | - | 101453178 | 101493363 | 1815 | 1534 | 10.57792667 |
| MTIF3    | NM_152912    | chr13 | - | 28007774  | 28026740  | 2502 | 1565 | 10.57507667 |
| PRKD1    | NM_002742    | chr14 | - | 30043685  | 30398900  | 5314 | 5275 | 10.56626    |
| CCNA1    | NM_003914    | chr13 | + | 37004407  | 37019020  | 1870 | 1292 | 10.56602333 |
| CXorf26  | NM_016500    | chrX  | + | 75390769  | 75400034  | 1122 | 1063 | 10.56522333 |
| FPR1     | NM_002029    | chr19 | - | 52247024  | 52257151  | 550  | 418  | 10.56351333 |
| C13orf34 | NM_024808    | chr13 | + | 73300040  | 73332329  | 1390 | 1248 | 10.55311667 |
| KIAA0586 | NM_014749    | chr14 | + | 58892708  | 59017550  | 2097 | 1671 | 10.55271    |
| NKRF     | NM_017544    | chrX  | - | 118720298 | 118741847 | 1833 | 1746 | 10.54615    |
| CWC25    | NM_017748    | chr17 | - | 36955444  | 36983590  | 2788 | 2575 | 10.54525667 |
| TFCP2L1  | NM_014553    | chr2  | - | 121972162 | 122044779 | 5200 | 4781 | 10.54521    |
| EREG     | NM_001432    | chr4  | + | 75228858  | 75256478  | 2462 | 1797 | 10.54132333 |
| ADNP2    | NM_014913    | chr18 | + | 77864913  | 77900229  | 1731 | 1655 | 10.53821333 |
| ZNF385D  | NM_024697    | chr3  | - | 21460488  | 21794817  | 5206 | 4951 | 10.53065333 |
| KCTD14   | NM_023930    | chr11 | - | 77724759  | 77736321  | 1856 | 1237 | 10.53002    |
| FAM84A   | NM_145175    | chr2  | + | 14770808  | 14782169  | 4054 | 3168 | 10.51916333 |
| ZBTB33   | NM_006777    | chrX  | + | 119382605 | 119394252 | 1570 | 1560 | 10.50362333 |
| CHL1     | NM_006614    | chr3  | + | 236648    | 453098    | 5752 | 2268 | 10.50297667 |
| ENTPD3   | NM_001248    | chr3  | + | 40426671  | 40472111  | 1958 | 1465 | 10.49581333 |
| TOX3     | NM_001146188 | chr16 | - | 52469916  | 52583715  | 2466 | 1830 | 10.49441333 |
| MMP1     | NM_002421    | chr11 | - | 102658639 | 102670967 | 676  | 646  | 10.48739    |
| ZC3HC1   | NM_016478    | chr7  | - | 129656124 | 129693234 | 1236 | 1151 | 10.48241333 |

|         |              |       |   |           |           |      |      |             |
|---------|--------------|-------|---|-----------|-----------|------|------|-------------|
| SLCO4C1 | NM_180991    | chr5  | - | 101567690 | 101634254 | 1509 | 1136 | 10.47595333 |
| F3      | NM_001993    | chr1  | - | 94992730  | 95009414  | 1820 | 1626 | 10.47441333 |
| AASDH   | NM_181806    | chr4  | - | 57202455  | 57255639  | 1356 | 1221 | 10.4638     |
| ZNF658  | NM_033160    | chr9  | - | 40769400  | 40794113  | 469  | 0    | 10.46268667 |
| RIMS2   | NM_014677    | chr8  | + | 104829414 | 105267452 | 4700 | 2105 | 10.45099    |
| PNO1    | NM_020143    | chr2  | + | 68383003  | 68405095  | 1526 | 1359 | 10.44387333 |
| KITLG   | NM_003994    | chr12 | - | 88884568  | 88976251  | 2986 | 2463 | 10.43207    |
| BMPR1B  | NM_001203    | chr4  | + | 95677126  | 96081602  | 7136 | 3752 | 10.42898667 |
| PCP4    | NM_006198    | chr21 | + | 41237345  | 41303323  | 1757 | 753  | 10.42871667 |
| ZNF33B  | NM_006955    | chr10 | - | 43082553  | 43135993  | 1708 | 1112 | 10.42694667 |
| RRM2B   | NM_015713    | chr8  | - | 103214727 | 103253347 | 1714 | 1620 | 10.42678    |
| DDIT4L  | NM_145244    | chr4  | - | 101105025 | 101113656 | 1397 | 1200 | 10.41877667 |
| USP43   | NM_153210    | chr17 | + | 9546948   | 9635004   | 5359 | 3811 | 10.41370333 |
| AADAT   | NM_182662    | chr4  | - | 170979371 | 171013373 | 1832 | 1356 | 10.41118667 |
| FAM110C | NM_001077710 | chr2  | - | 36812     | 48589     | 3205 | 1707 | 10.41079667 |
| RAB38   | NM_022337    | chr11 | - | 87844413  | 87910636  | 1420 | 1006 | 10.41032333 |
| RNF20   | NM_019592    | chr9  | + | 104294131 | 104327627 | 1110 | 993  | 10.40348667 |
| PPM1L   | NM_139245    | chr3  | + | 160471994 | 160790818 | 6477 | 5728 | 10.39806667 |
| LAMA1   | NM_005559    | chr18 | - | 6939884   | 7119814   | 5873 | 5283 | 10.39628    |
| ST6GAL2 | NM_032528    | chr2  | - | 107416054 | 107505564 | 3062 | 2050 | 10.38855667 |
| STARD4  | NM_139164    | chr5  | - | 110832020 | 110850158 | 1145 | 1132 | 10.38598667 |
| P4HA3   | NM_182904    | chr11 | - | 73975700  | 74024700  | 2557 | 2236 | 10.38052667 |
| NCAPG   | NM_022346    | chr4  | + | 17810523  | 17848488  | 1387 | 1242 | 10.37890667 |
| NR1H4   | NM_005123    | chr12 | + | 100865677 | 100959644 | 3176 | 2367 | 10.36888667 |

|           |              |       |   |           |           |      |      |             |
|-----------|--------------|-------|---|-----------|-----------|------|------|-------------|
| KRT6A     | NM_005554    | chr12 | - | 52878956  | 52889182  | 483  | 147  | 10.36125333 |
| OSGIN2    | NM_004337    | chr8  | + | 90912094  | 90942096  | 1504 | 1427 | 10.36025667 |
| SEMA6A    | NM_020796    | chr5  | - | 115777249 | 115912552 | 9021 | 6099 | 10.35802667 |
| GPR27     | NM_018971    | chr3  | + | 71801199  | 71806329  | 1357 | 1351 | 10.35734333 |
| SPCS3     | NM_021928    | chr4  | + | 177239088 | 177255397 | 1425 | 1344 | 10.35608667 |
| IMPA1     | NM_005536    | chr8  | - | 82567149  | 82600590  | 851  | 850  | 10.35451333 |
| C3orf52   | NM_024616    | chr3  | + | 111803180 | 111839045 | 4099 | 3946 | 10.35398667 |
| ZNF22     | NM_006963    | chr10 | + | 45494271  | 45502778  | 1769 | 1762 | 10.35192667 |
| SERF1A    | NM_022968    | chr5  | + | 69319070  | 69330526  | 810  | 808  | 10.34925333 |
| LCORL     | NM_153686    | chr4  | - | 17842837  | 18025484  | 3140 | 2648 | 10.34846    |
| CYTL1     | NM_018659    | chr4  | - | 5014312   | 5023198   | 518  | 516  | 10.34475    |
| GCA       | NM_012198    | chr2  | + | 163198581 | 163221149 | 1087 | 835  | 10.31845333 |
| USPL1     | NM_005800    | chr13 | + | 31189828  | 31235687  | 1814 | 1787 | 10.31685667 |
| DYNC1LI1  | NM_016141    | chr3  | - | 32565461  | 32614367  | 1678 | 1495 | 10.31415    |
| DMRTA1    | NM_022160    | chr9  | + | 22444838  | 22454473  | 1501 | 1402 | 10.30007    |
| C12orf39  | NM_030572    | chr12 | + | 21677254  | 21686211  | 1618 | 849  | 10.29660333 |
| ZNF626    | NM_145297    | chr19 | - | 20825507  | 20846403  | 1221 | 872  | 10.28107667 |
| FAM83B    | NM_001010872 | chr6  | + | 54709567  | 54808820  | 3720 | 534  | 10.27930667 |
| CPVL      | NM_031311    | chr7  | - | 29033245  | 29188154  | 4857 | 4381 | 10.26449    |
| TRIM68    | NM_018073    | chr11 | - | 4617900   | 4631438   | 1243 | 1154 | 10.26056667 |
| NPFRR2    | NM_053036    | chr4  | + | 72902847  | 73015919  | 1594 | 335  | 10.25931    |
| C18orf21  | NM_031446    | chr18 | + | 33550586  | 33561242  | 961  | 952  | 10.25070333 |
| NEK3      | NM_001146099 | chr13 | - | 52704777  | 52735997  | 1059 | 1058 | 10.22516333 |
| HIST2H2BF | NM_001161334 | chr1  | - | 149752243 | 149785929 | 1304 | 782  | 10.22199    |

|           |              |       |   |           |           |      |      |             |
|-----------|--------------|-------|---|-----------|-----------|------|------|-------------|
| ZCCHC4    | NM_024936    | chr4  | + | 25312394  | 25374006  | 2140 | 2043 | 10.21909333 |
| KRT16     | NM_005557    | chr17 | - | 39764029  | 39771080  | 448  | 295  | 10.19135    |
| ARMCX5    | NM_022838    | chrX  | + | 101852424 | 101861086 | 1438 | 1290 | 10.15255667 |
| KAAG1     | NM_181337    | chr6  | + | 24355129  | 24360513  | 2036 | 1045 | 10.15134667 |
| CASD1     | NM_022900    | chr7  | + | 94137168  | 94188329  | 2058 | 1977 | 10.14869333 |
| KIAA1598  | NM_018330    | chr10 | - | 118642304 | 118767089 | 4765 | 4718 | 10.14706667 |
| CHN1      | NM_001822    | chr2  | - | 175662040 | 175872171 | 6576 | 6574 | 10.14616667 |
| MNS1      | NM_018365    | chr15 | - | 56718927  | 56759336  | 1082 | 970  | 10.13362333 |
| POLR3F    | NM_006466    | chr20 | + | 18446031  | 18467287  | 1327 | 1301 | 10.13094333 |
| RASSF10   | NM_001080521 | chr11 | + | 13028968  | 13035654  | 3508 | 2858 | 10.12547333 |
| UQRFS1    | NM_006003    | chr19 | - | 29696165  | 29706137  | 1518 | 1512 | 10.11635    |
| NAAA      | NM_014435    | chr4  | - | 76832807  | 76864167  | 2221 | 1984 | 10.11349667 |
| SERBP1    | NM_015640    | chr1  | - | 67871491  | 67898124  | 1814 | 1730 | 10.10971667 |
| FGFR2     | NM_022970    | chr10 | - | 123235842 | 123359973 | 8707 | 7962 | 10.10248333 |
| SEMA6D    | NM_153619    | chr15 | + | 48008684  | 48068421  | 5284 | 4224 | 10.09892333 |
| C10orf118 | NM_018017    | chr10 | - | 115879972 | 115936365 | 2459 | 1898 | 10.09796333 |
| GJB4      | NM_153212    | chr1  | + | 35223340  | 35231326  | 2887 | 1154 | 10.09441667 |
| CHMP2B    | NM_014043    | chr3  | + | 87274411  | 87306699  | 1266 | 1119 | 10.0943     |
| PRRG4     | NM_024081    | chr11 | + | 32849487  | 32878106  | 2762 | 1670 | 10.08126333 |
| SIKE1     | NM_025073    | chr1  | - | 115310103 | 115325309 | 753  | 749  | 10.08103667 |
| ASTE1     | NM_014065    | chr3  | - | 130730719 | 130747647 | 869  | 856  | 10.07039667 |
| DSC2      | NM_024422    | chr18 | - | 28643940  | 28684389  | 2133 | 1928 | 10.06863    |
| SPAG16    | NM_024532    | chr2  | + | 214147114 | 215277226 | 6477 | 6345 | 10.06637    |
| MANEA     | NM_024641    | chr6  | + | 96023411  | 96059327  | 1190 | 809  | 10.06598667 |

|         |              |       |   |           |           |       |      |             |
|---------|--------------|-------|---|-----------|-----------|-------|------|-------------|
| MOSPD2  | NM_152581    | chrX  | + | 14889525  | 14941460  | 2964  | 2511 | 10.06209    |
| NEFM    | NM_005382    | chr8  | + | 24769272  | 24778607  | 2843  | 2043 | 10.05453667 |
| CNTNAP3 | NM_033655    | chr9  | - | 39070762  | 39290301  | 774   | 87   | 10.04796    |
| TRIM23  | NM_033228    | chr5  | - | 64883505  | 64922188  | 1540  | 1230 | 10.03952667 |
| WDFY3   | NM_014991    | chr4  | - | 85588691  | 85889545  | 6631  | 6026 | 10.03767667 |
| UPK1B   | NM_006952    | chr3  | + | 118890423 | 118926001 | 3135  | 1088 | 10.02635667 |
| ACP6    | NM_016361    | chr1  | - | 147117166 | 147144635 | 2007  | 1673 | 10.02444333 |
| CLSTN2  | NM_022131    | chr3  | + | 139652025 | 140288920 | 11268 | 6966 | 10.01848    |
| COL4A3  | NM_000091    | chr2  | + | 228027279 | 228181509 | 4380  | 2850 | 10.01318    |
| FREM2   | NM_207361    | chr13 | + | 39259171  | 39463268  | 4159  | 549  | 10.00802333 |
| C9orf82 | NM_024828    | chr9  | - | 26838681  | 26894827  | 1477  | 999  | 9.997986667 |
| GREB1L  | NM_001142966 | chr18 | + | 18820201  | 19104792  | 8152  | 7056 | 9.993523333 |
| BRWD3   | NM_153252    | chrX  | - | 79922985  | 80067234  | 2940  | 2344 | 9.992926667 |
| ZNF264  | NM_003417    | chr19 | + | 57700866  | 57736215  | 1434  | 1388 | 9.98878     |
| TPP2    | NM_003291    | chr13 | + | 103247284 | 103333524 | 2657  | 2233 | 9.98024     |
| SLN     | NM_003063    | chr11 | - | 107576099 | 107584788 | 931   | 98   | 9.97346     |
| ZNF304  | NM_020657    | chr19 | + | 57860643  | 57873266  | 1066  | 930  | 9.95129     |
| CTH     | NM_153742    | chr1  | + | 70874899  | 70907535  | 1650  | 1385 | 9.95114     |
| ODF2L   | NM_020729    | chr1  | - | 86813775  | 86864026  | 1180  | 1150 | 9.949363333 |
| CYP8B1  | NM_004391    | chr3  | - | 42911682  | 42919634  | 1870  | 885  | 9.941673333 |
| UBXN2B  | NM_001077619 | chr8  | + | 59321821  | 59366061  | 1239  | 1173 | 9.931196667 |
| SAMD5   | NM_001030060 | chr6  | + | 147827826 | 147893158 | 4405  | 3393 | 9.927116667 |
| YTHDC2  | NM_022828    | chr5  | + | 112847389 | 112932985 | 1872  | 1853 | 9.92682     |
| SAP30   | NM_003864    | chr4  | + | 174290091 | 174300684 | 2714  | 2638 | 9.924806667 |

|          |              |       |   |           |           |      |      |             |
|----------|--------------|-------|---|-----------|-----------|------|------|-------------|
| PKP2     | NM_004572    | chr12 | - | 32941678  | 33051781  | 3480 | 2153 | 9.912643333 |
| GPR87    | NM_023915    | chr3  | - | 151009874 | 151036637 | 1567 | 914  | 9.912133333 |
| ZBTB7C   | NM_001039360 | chr18 | - | 45551744  | 45569495  | 2584 | 1335 | 9.90545     |
| PDE10A   | NM_006661    | chr6  | - | 165738776 | 166077585 | 7151 | 5849 | 9.902183333 |
| FKTN     | NM_006731    | chr9  | + | 108318409 | 108405400 | 985  | 954  | 9.89978     |
| C18orf62 | NM_001037331 | chr18 | - | 73119825  | 73141590  | 2087 | 748  | 9.889626667 |
| JPH2     | NM_175913    | chr20 | - | 42803455  | 42818219  | 2096 | 1431 | 9.88269     |
| HLA-G    | NM_002127    | chr6  | + | 29792754  | 29800900  | 745  | 301  | 9.8814      |
| ZNF85    | NM_003429    | chr19 | + | 21104057  | 21135504  | 887  | 840  | 9.878053333 |
| EPHA4    | NM_004438    | chr2  | - | 222280745 | 222439011 | 8318 | 7431 | 9.873156667 |
| TUBE1    | NM_016262    | chr6  | - | 112389858 | 112410752 | 995  | 951  | 9.865663333 |
| DBT      | NM_001918    | chr1  | - | 100650476 | 100717410 | 2599 | 1671 | 9.863536667 |
| GPRIN3   | NM_198281    | chr4  | - | 90163427  | 90231162  | 3486 | 2075 | 9.863       |
| BMP2     | NM_001200    | chr20 | + | 6746743   | 6762911   | 3426 | 3134 | 9.834646667 |
| CTSO     | NM_001334    | chr4  | - | 156843268 | 156877049 | 1678 | 1511 | 9.824616667 |
| C3orf63  | NM_015224    | chr3  | - | 56652158  | 56700075  | 933  | 253  | 9.82459     |
| POLQ     | NM_199420    | chr3  | - | 121148271 | 121266854 | 3303 | 3149 | 9.816253333 |
| ZNF607   | NM_032689    | chr19 | - | 38185262  | 38212692  | 1214 | 1049 | 9.814623333 |
| SNAP25   | NM_130811    | chr20 | + | 10197475  | 10290066  | 3834 | 3629 | 9.814253333 |
| FBXL3    | NM_012158    | chr13 | - | 77577387  | 77603332  | 1667 | 1653 | 9.81201     |
| PAQR3    | NM_001040202 | chr4  | - | 79837092  | 79862583  | 980  | 804  | 9.799776667 |
| HHIP     | NM_022475    | chr4  | + | 145565171 | 145661882 | 4852 | 1646 | 9.794453333 |
| ERCC8    | NM_000082    | chr5  | - | 60167657  | 60242906  | 1801 | 1585 | 9.789046667 |
| WDR43    | NM_015131    | chr2  | + | 29115531  | 29173081  | 1997 | 1779 | 9.78363     |

|          |              |       |   |           |           |      |      |             |
|----------|--------------|-------|---|-----------|-----------|------|------|-------------|
| FAM72D   | NM_207418    | chr1  | - | 143894450 | 143915144 | 841  | 690  | 9.772186667 |
| FAM72A   | NM_001123168 | chr1  | + | 206136909 | 206157075 | 1401 | 590  | 9.772186667 |
| GPAM     | NM_020918    | chr10 | - | 113907620 | 113945526 | 1388 | 1229 | 9.77077     |
| TFB1M    | NM_016020    | chr6  | - | 155576788 | 155637627 | 2135 | 1739 | 9.76946     |
| NETO1    | NM_153181    | chr18 | - | 70412785  | 70534935  | 1825 | 383  | 9.76435     |
| NLGN1    | NM_014932    | chr3  | + | 173114242 | 174003117 | 9336 | 5503 | 9.761963333 |
| S1PR1    | NM_001400    | chr1  | + | 101700303 | 101709077 | 3107 | 2288 | 9.761376667 |
| BTC      | NM_001729    | chr4  | - | 75669446  | 75721883  | 1756 | 1450 | 9.753986667 |
| RDH14    | NM_020905    | chr2  | - | 18733987  | 18743960  | 1352 | 1204 | 9.74985     |
| ZNF280D  | NM_017661    | chr15 | - | 56920372  | 57027788  | 1140 | 1016 | 9.74948     |
| LRRC6    | NM_012472    | chr8  | - | 133582445 | 133689814 | 1747 | 1412 | 9.741466667 |
| CEP78    | NM_032171    | chr9  | + | 80848989  | 80883984  | 1827 | 1731 | 9.737906667 |
| C3orf14  | NM_020685    | chr3  | + | 62303394  | 62321321  | 1180 | 1078 | 9.734993333 |
| CYP2R1   | NM_024514    | chr11 | - | 14897554  | 14915752  | 1805 | 1753 | 9.722873333 |
| SLC12A2  | NM_001046    | chr5  | + | 127417481 | 127527381 | 2670 | 2565 | 9.72207     |
| C12orf26 | NM_032230    | chr12 | + | 82750274  | 82875017  | 2527 | 1243 | 9.711266667 |
| DNAJC19  | NM_145261    | chr3  | - | 180699496 | 180709563 | 938  | 899  | 9.711133333 |
| SLC8A1   | NM_021097    | chr2  | - | 40337284  | 40659445  | 4725 | 4186 | 9.69346     |
| LSM5     | NM_012322    | chr7  | - | 32522943  | 32532024  | 904  | 696  | 9.685223333 |
| PRKCQ    | NM_006257    | chr10 | - | 6467103   | 6624239   | 7446 | 5202 | 9.6798      |
| SLITRK4  | NM_173078    | chrX  | - | 142708593 | 142725020 | 3409 | 1255 | 9.67953     |
| HSPA13   | NM_006948    | chr21 | - | 15741435  | 15757510  | 1224 | 1121 | 9.661396667 |
| TUSC1    | NM_001004125 | chr9  | - | 25674385  | 25680857  | 1648 | 1538 | 9.654203333 |
| DBC1     | NM_014618    | chr9  | - | 121926906 | 122133740 | 5446 | 1986 | 9.648323333 |



|          |              |       |   |           |           |       |      |             |
|----------|--------------|-------|---|-----------|-----------|-------|------|-------------|
| GUCY1A3  | NM_001130687 | chr4  | + | 156585860 | 156645386 | 2692  | 1972 | 9.64561     |
| SLC25A40 | NM_018843    | chr7  | - | 87461812  | 87507693  | 1555  | 1492 | 9.62554     |
| CCDC18   | NM_206886    | chr1  | + | 93643918  | 93746269  | 3127  | 2529 | 9.6163      |
| MRPL13   | NM_014078    | chr8  | - | 121406081 | 121459648 | 1527  | 1033 | 9.611476667 |
| ZNF680   | NM_178558    | chr7  | - | 63978253  | 64025506  | 1423  | 1279 | 9.607923333 |
| IRAK1BP1 | NM_001010844 | chr6  | + | 79575187  | 79610321  | 1190  | 1104 | 9.606626667 |
| KCNH1    | NM_172362    | chr1  | - | 210849655 | 211309458 | 8642  | 7423 | 9.598546667 |
| CNTNAP2  | NM_014141    | chr7  | + | 145811451 | 148120089 | 10914 | 9209 | 9.573486667 |
| CD1D     | NM_001766    | chr1  | + | 158147735 | 158158217 | 1353  | 1207 | 9.56964     |
| FGFR1OP2 | NM_015633    | chr12 | + | 27089303  | 27121582  | 1331  | 1326 | 9.567953333 |
| PTPLAD2  | NM_001010915 | chr9  | - | 21004363  | 21033636  | 1418  | 1313 | 9.567366667 |
| RASSF9   | NM_005447    | chr12 | - | 86196329  | 86232319  | 2172  | 958  | 9.567136667 |
| CLDN16   | NM_006580    | chr3  | + | 190103659 | 190131933 | 794   | 702  | 9.557223333 |
| CPEB2    | NM_182646    | chr4  | + | 15002296  | 15073778  | 4308  | 4146 | 9.55647     |
| GULP1    | NM_016315    | chr2  | + | 189155388 | 189462653 | 6138  | 3812 | 9.5562      |
| SYT13    | NM_020826    | chr11 | - | 45259851  | 45309885  | 4826  | 3573 | 9.554943333 |
| IFI44    | NM_006417    | chr1  | + | 79113475  | 79131764  | 375   | 349  | 9.55327     |
| LOXL4    | NM_032211    | chr10 | - | 100005441 | 100030008 | 4948  | 4905 | 9.534183333 |
| CCDC66   | NM_001141947 | chr3  | + | 56589182  | 56657849  | 999   | 988  | 9.52786     |
| B3GALT5  | NM_033173    | chr21 | + | 41027252  | 41036816  | 1158  | 828  | 9.52639     |
| ADAM28   | NM_021777    | chr8  | + | 24149578  | 24195613  | 629   | 339  | 9.522073333 |
| SEPSECS  | NM_016955    | chr4  | - | 25119625  | 25164205  | 1622  | 1565 | 9.51889     |
| DNAH5    | NM_001369    | chr5  | - | 13688435  | 13946590  | 5945  | 927  | 9.517973333 |
| ZNF492   | NM_020855    | chr19 | + | 22815124  | 22852473  | 1196  | 628  | 9.511596667 |

|          |              |       |   |           |           |       |      |             |
|----------|--------------|-------|---|-----------|-----------|-------|------|-------------|
| ARHGEF26 | NM_015595    | chr3  | + | 153837147 | 153977617 | 3628  | 3437 | 9.510793333 |
| PELI1    | NM_020651    | chr2  | - | 64317784  | 64373606  | 2090  | 1641 | 9.488613333 |
| SESN3    | NM_144665    | chr11 | - | 94904131  | 94966247  | 2127  | 1438 | 9.48257     |
| PPP1R9A  | NM_017650    | chr7  | + | 94534947  | 94927728  | 6428  | 3234 | 9.47995     |
| FAM59A   | NM_022751    | chr18 | - | 29845475  | 30052448  | 6080  | 5611 | 9.47817     |
| FGF2     | NM_002006    | chr4  | + | 123745861 | 123821391 | 4083  | 3991 | 9.47691     |
| NPY5R    | NM_006174    | chr4  | + | 164263089 | 164275087 | 1552  | 381  | 9.476416667 |
| FIGN     | NM_018086    | chr2  | - | 164462116 | 164594514 | 3128  | 3082 | 9.471493333 |
| ANKRD18A | NM_147195    | chr9  | - | 38569359  | 38622361  | 2713  | 2578 | 9.471276667 |
| ALS2CR8  | NM_024744    | chr2  | + | 203775115 | 203853061 | 2945  | 2559 | 9.467766667 |
| SPOPL    | NM_001001664 | chr2  | + | 139257348 | 139332806 | 2350  | 1976 | 9.446453333 |
| BAZ2B    | NM_013450    | chr2  | - | 160173488 | 160475060 | 4435  | 3380 | 9.433616667 |
| XKR4     | NM_052898    | chr8  | + | 56013015  | 56440711  | 10509 | 5627 | 9.431743333 |
| CEACAM3  | NM_001815    | chr19 | + | 42298532  | 42317592  | 869   | 831  | 9.43057     |
| ARSJ     | NM_024590    | chr4  | - | 114819438 | 114902879 | 3309  | 2092 | 9.427806667 |
| CDS1     | NM_001263    | chr4  | + | 85502055  | 85574494  | 2460  | 1885 | 9.424953333 |
| ZNF285   | NM_152354    | chr19 | - | 44887806  | 44907778  | 851   | 805  | 9.423296667 |
| KIN      | NM_012311    | chr10 | - | 7795365   | 7831945   | 1900  | 1854 | 9.422823333 |
| MGAM     | NM_004668    | chr7  | + | 141693677 | 141808548 | 3189  | 408  | 9.41074     |
| RAD52    | NM_134424    | chr12 | - | 1019253   | 1060864   | 2120  | 2069 | 9.410536667 |
| ZNF334   | NM_199441    | chr20 | - | 45127705  | 45144195  | 724   | 586  | 9.40254     |
| HPGD     | NM_001145816 | chr4  | - | 175409326 | 175445793 | 1338  | 559  | 9.401013333 |
| SPATA18  | NM_145263    | chr4  | + | 52915591  | 52965459  | 2675  | 2167 | 9.399676667 |
| CHST9    | NM_031422    | chr18 | - | 24493593  | 24767290  | 6020  | 2792 | 9.395873333 |

|          |              |       |   |           |           |       |       |             |
|----------|--------------|-------|---|-----------|-----------|-------|-------|-------------|
| SEMA3C   | NM_006379    | chr7  | - | 80369852  | 80550668  | 3358  | 2811  | 9.392226667 |
| AKAP7    | NM_138633    | chr6  | + | 131569502 | 131606674 | 1279  | 685   | 9.392016667 |
| ZNF470   | NM_001001668 | chr19 | + | 57076888  | 57096263  | 1264  | 1112  | 9.378056667 |
| NAA16    | NM_024561    | chr13 | + | 41883339  | 41953167  | 1843  | 1826  | 9.37306     |
| STAC     | NM_003149    | chr3  | + | 36420095  | 36591497  | 6430  | 5214  | 9.36826     |
| IFIT1    | NM_001548    | chr10 | + | 91150320  | 91165745  | 1349  | 1038  | 9.366623333 |
| SLC16A12 | NM_213606    | chr10 | - | 91188049  | 91297314  | 4598  | 3707  | 9.345923333 |
| C6orf138 | NM_207499    | chr6  | - | 47865343  | 48038426  | 1367  | 69    | 9.338243333 |
| FAM153A  | NM_173663    | chr5  | - | 177148363 | 177209506 | 390   | 100   | 9.337343333 |
| DMBT1    | NM_017579    | chr10 | + | 124318179 | 124405253 | 4059  | 3335  | 9.336523333 |
| PCOTH    | NM_001135816 | chr13 | + | 24461590  | 24468243  | 1958  | 1512  | 9.33524     |
| HNF4G    | NM_004133    | chr8  | + | 76450201  | 76481062  | 259   | 0     | 9.327913333 |
| CGB5     | NM_033043    | chr19 | + | 49545100  | 49550569  | 352   | 305   | 9.32702     |
| CDKL2    | NM_003948    | chr4  | - | 76499702  | 76557722  | 1321  | 982   | 9.30918     |
| SCAND3   | NM_052923    | chr6  | - | 28537405  | 28557113  | 1528  | 1094  | 9.304783333 |
| COBLL1   | NM_014900    | chr2  | - | 165539256 | 165699929 | 4844  | 4203  | 9.30446     |
| ANKRD50  | NM_020337    | chr4  | - | 125583202 | 125635888 | 2230  | 2137  | 9.290986667 |
| IL1F10   | NM_173161    | chr2  | + | 113823545 | 113835428 | 593   | 214   | 9.28121     |
| TXNDC16  | NM_020784    | chr14 | - | 52895306  | 53021302  | 3403  | 3015  | 9.269836667 |
| KPNA1    | NM_002264    | chr3  | - | 122138746 | 122235787 | 2639  | 2590  | 9.269683333 |
| ARL6     | NM_177976    | chr3  | + | 97481593  | 97519374  | 1192  | 850   | 9.267786667 |
| MACROD2  | NM_080676    | chr20 | + | 13974144  | 16035842  | 24253 | 20328 | 9.259123333 |
| C9orf102 | NM_001010895 | chr9  | + | 98635898  | 98733123  | 1700  | 1602  | 9.246706667 |
| KLHL20   | NM_014458    | chr1  | + | 173682078 | 173757841 | 1523  | 1050  | 9.239623333 |

|          |              |       |   |           |           |      |      |             |
|----------|--------------|-------|---|-----------|-----------|------|------|-------------|
| APBA1    | NM_001163    | chr9  | - | 72040447  | 72289276  | 8705 | 8262 | 9.233093333 |
| UGT8     | NM_003360    | chr4  | + | 115541521 | 115600203 | 351  | 317  | 9.232343333 |
| COL22A1  | NM_152888    | chr8  | - | 139598476 | 139928237 | 7554 | 6156 | 9.22053     |
| ANO5     | NM_213599    | chr11 | + | 22212720  | 22306914  | 2070 | 1977 | 9.2195      |
| ZFP42    | NM_174900    | chr4  | + | 188914923 | 188928200 | 1244 | 274  | 9.20709     |
| TRAM1L1  | NM_152402    | chr4  | - | 118002708 | 118008737 | 664  | 523  | 9.207043333 |
| C2orf67  | NM_152519    | chr2  | - | 210883433 | 211038052 | 2369 | 2135 | 9.19704     |
| DMGDH    | NM_013391    | chr5  | - | 78291427  | 78367450  | 3352 | 2892 | 9.192483333 |
| TM4SF18  | NM_138786    | chr3  | - | 149034283 | 149053549 | 326  | 0    | 9.183423333 |
| TRPM3    | NM_206948    | chr9  | - | 73396776  | 73485975  | 1464 | 297  | 9.176156667 |
| PAPPA2   | NM_021936    | chr1  | + | 176430305 | 176662342 | 4512 | 3049 | 9.174263333 |
| KLF8     | NM_007250    | chrX  | + | 56256820  | 56316323  | 2525 | 1733 | 9.168266667 |
| ENPP2    | NM_006209    | chr8  | - | 120567317 | 120653107 | 3187 | 2873 | 9.15386     |
| PTER     | NM_030664    | chr10 | + | 16476965  | 16557737  | 1689 | 1582 | 9.149416667 |
| ZNF433   | NM_001080411 | chr19 | - | 12123530  | 12148526  | 1298 | 1036 | 9.12931     |
| ZNF681   | NM_138286    | chr19 | - | 23919995  | 23943694  | 1064 | 853  | 9.12869     |
| UGT3A2   | NM_174914    | chr5  | - | 36033117  | 36069024  | 320  | 232  | 9.12766     |
| CKAP2L   | NM_152515    | chr2  | - | 113493442 | 113524255 | 1894 | 1630 | 9.122036667 |
| C13orf31 | NM_153218    | chr13 | + | 44451967  | 44470069  | 1438 | 1277 | 9.10155     |
| FAM134B  | NM_019000    | chr5  | - | 16471145  | 16511032  | 1890 | 1566 | 9.101546667 |
| ORC1     | NM_004153    | chr1  | - | 52836499  | 52872144  | 1565 | 1513 | 9.101516667 |
| ZNF257   | NM_033468    | chr19 | + | 22233264  | 22275904  | 795  | 701  | 9.086206667 |
| ZNF667   | NM_022103    | chr19 | - | 56948691  | 56990771  | 1902 | 1605 | 9.08085     |
| LRRC31   | NM_024727    | chr3  | - | 169555027 | 169589661 | 2054 | 1734 | 9.064913333 |

|          |              |       |   |           |           |       |      |             |
|----------|--------------|-------|---|-----------|-----------|-------|------|-------------|
| STEAP2   | NM_152999    | chr7  | + | 89838998  | 89868993  | 1088  | 993  | 9.059893333 |
| CPS1     | NM_001875    | chr2  | + | 211419324 | 211545832 | 816   | 780  | 9.045333333 |
| LRFN5    | NM_152447    | chr14 | + | 42074762  | 42375753  | 3981  | 1155 | 9.02487     |
| HIC2     | NM_015094    | chr22 | + | 21769691  | 21807751  | 2803  | 1985 | 9.014283333 |
| SLC5A9   | NM_001135181 | chr1  | + | 48686355  | 48716317  | 2845  | 2303 | 9.009916667 |
| AQP11    | NM_173039    | chr11 | + | 77298678  | 77323402  | 1922  | 1777 | 9.009746667 |
| MAGEE1   | NM_020932    | chrX  | + | 75646044  | 75653747  | 1155  | 1134 | 8.993353333 |
| ZNF782   | NM_001001662 | chr9  | - | 99577271  | 99618390  | 868   | 729  | 8.987566667 |
| SLC17A3  | NM_006632    | chr6  | - | 25843326  | 25876472  | 430   | 233  | 8.986316667 |
| EYA4     | NM_172105    | chr6  | + | 133560493 | 133855259 | 3488  | 2626 | 8.98359     |
| EDAR     | NM_022336    | chr2  | - | 109508925 | 109607829 | 8168  | 7720 | 8.982746667 |
| FEM1C    | NM_020177    | chr5  | - | 114854606 | 114882592 | 1392  | 1305 | 8.97989     |
| RFX7     | NM_022841    | chr15 | - | 56380729  | 56537484  | 2551  | 2304 | 8.977626667 |
| PDE1A    | NM_005019    | chr2  | - | 183005181 | 183389254 | 3073  | 2845 | 8.97616     |
| C12orf29 | NM_001009894 | chr12 | + | 88427266  | 88445938  | 985   | 918  | 8.96963     |
| TAGLN3   | NM_013259    | chr3  | + | 111715584 | 111734736 | 1930  | 1849 | 8.958713333 |
| SST      | NM_001048    | chr3  | - | 187384692 | 187390202 | 811   | 243  | 8.951036667 |
| FZD7     | NM_003507    | chr2  | + | 202897308 | 202905161 | 3629  | 3412 | 8.946353333 |
| DCLK1    | NM_004734    | chr13 | - | 36340788  | 36707515  | 11242 | 8996 | 8.923333333 |
| FBN2     | NM_001999    | chr5  | - | 127591599 | 127875736 | 5487  | 1971 | 8.916773333 |
| ADAMTS3  | NM_014243    | chr4  | - | 73144685  | 73436517  | 7388  | 6608 | 8.91665     |
| HRASLS   | NM_020386    | chr3  | + | 192956916 | 192990645 | 1278  | 1125 | 8.909063333 |
| NRK      | NM_198465    | chrX  | + | 105064534 | 105204603 | 2943  | 2192 | 8.90548     |
| C21orf91 | NM_017447    | chr21 | - | 19159282  | 19193704  | 1985  | 1869 | 8.903146667 |

|          |              |       |   |           |           |       |       |             |
|----------|--------------|-------|---|-----------|-----------|-------|-------|-------------|
| ZNF75D   | NM_007131    | chrX  | - | 134417721 | 134431966 | 577   | 532   | 8.896763333 |
| ZNF682   | NM_033196    | chr19 | - | 20113225  | 20152278  | 968   | 874   | 8.887793333 |
| GALNT4   | NM_003774    | chr12 | - | 89911188  | 89920536  | 2069  | 2064  | 8.886403333 |
| ZNF154   | NM_001085384 | chr19 | - | 58209808  | 58222580  | 906   | 888   | 8.884146667 |
| KCTD4    | NM_198404    | chr13 | - | 45764986  | 45777176  | 377   | 0     | 8.877496667 |
| IL33     | NM_033439    | chr9  | + | 6239676   | 6259983   | 668   | 345   | 8.86943     |
| SLC25A32 | NM_030780    | chr8  | - | 104408864 | 104429469 | 1559  | 1095  | 8.868       |
| ZNF649   | NM_023074    | chr19 | - | 52390486  | 52410306  | 1920  | 1860  | 8.861746667 |
| MYO5B    | NM_001080467 | chr18 | - | 47347154  | 47723452  | 16837 | 14487 | 8.857126667 |
| BARX2    | NM_003658    | chr11 | + | 129243879 | 129324175 | 2757  | 2493  | 8.85065     |
| C9orf123 | NM_033428    | chr9  | - | 7794489   | 7801800   | 1363  | 1277  | 8.842363333 |
| C6orf141 | NM_001145652 | chr6  | + | 49516111  | 49521809  | 1873  | 1137  | 8.83881     |
| ZNF454   | NM_182594    | chr5  | + | 178366192 | 178395219 | 1417  | 1268  | 8.838596667 |
| EIF5A2   | NM_020390    | chr3  | - | 170604202 | 170628427 | 2151  | 1923  | 8.835623333 |
| OPN1LW   | NM_020061    | chrX  | + | 153407723 | 153426508 | 675   | 0     | 8.825923333 |
| GPR173   | NM_018969    | chrX  | + | 53076504  | 53111797  | 5599  | 5393  | 8.820716667 |
| C1QTNF9B | NM_001007537 | chr13 | - | 24463426  | 24473126  | 1233  | 1059  | 8.79536     |
| CLEC18A  | NM_182619    | chr16 | + | 69982808  | 69999890  | 1287  | 667   | 8.794433333 |
| MRPS14   | NM_022100    | chr1  | - | 174981126 | 174994562 | 1036  | 984   | 8.786956667 |
| SYNJ2BP  | NM_018373    | chr14 | - | 70831211  | 70885808  | 976   | 919   | 8.778643333 |
| TP53AIP1 | NM_022112    | chr11 | - | 128803268 | 128815295 | 2348  | 1912  | 8.77534     |
| ZFP2     | NM_030613    | chr5  | + | 178320914 | 178362211 | 982   | 977   | 8.757306667 |
| FABP3    | NM_004102    | chr1  | - | 31836098  | 31847924  | 2631  | 1968  | 8.74651     |
| ACVR2A   | NM_001616    | chr2  | + | 148600568 | 148690394 | 2702  | 2233  | 8.730503333 |

|           |              |       |   |           |           |       |       |             |
|-----------|--------------|-------|---|-----------|-----------|-------|-------|-------------|
| HMGB2     | NM_002129    | chr4  | - | 174250525 | 174257596 | 2240  | 2098  | 8.727066667 |
| DPY19L2   | NM_173812    | chr12 | - | 63950691  | 64064355  | 1122  | 0     | 8.71714     |
| FAM71F1   | NM_032599    | chr7  | + | 128353441 | 128373798 | 1069  | 670   | 8.71705     |
| ESRRG     | NM_206595    | chr1  | - | 216674586 | 217264977 | 12539 | 3334  | 8.70754     |
| CLEC18B   | NM_001011880 | chr16 | - | 74440527  | 74457369  | 1246  | 520   | 8.704683333 |
| MZT1      | NM_001071775 | chr13 | - | 73280493  | 73303939  | 1583  | 1505  | 8.704066667 |
| C10orf119 | NM_024834    | chr10 | - | 121586970 | 121634395 | 2023  | 1852  | 8.70262     |
| HLF       | NM_002126    | chr17 | + | 53340319  | 53404427  | 4769  | 4512  | 8.69911     |
| SMARCAD1  | NM_020159    | chr4  | + | 95127014  | 95214444  | 1018  | 1012  | 8.6949      |
| BCL2L15   | NM_001010922 | chr1  | - | 114417434 | 114432170 | 851   | 303   | 8.68299     |
| RSPO3     | NM_032784    | chr6  | + | 127438046 | 127520185 | 3413  | 3377  | 8.68064     |
| OVGP1     | NM_002557    | chr1  | - | 111954935 | 111972400 | 1480  | 1457  | 8.659673333 |
| CCDC144B  | NM_182568    | chr17 | - | 18484720  | 18530846  | 497   | 418   | 8.655593333 |
| ABCB1     | NM_000927    | chr7  | - | 87130946  | 87344565  | 4604  | 4117  | 8.652056667 |
| CHRM3     | NM_000740    | chr1  | + | 239790371 | 240074718 | 2649  | 1528  | 8.649906667 |
| ZNF418    | NM_133460    | chr19 | - | 58431250  | 58448741  | 822   | 459   | 8.646946667 |
| C11orf58  | NM_014267    | chr11 | + | 16758146  | 16781902  | 1273  | 1259  | 8.64625     |
| FBXL4     | NM_012160    | chr6  | - | 99319599  | 99397850  | 2245  | 2064  | 8.642893333 |
| ZNF25     | NM_145011    | chr10 | - | 38236793  | 38267454  | 1103  | 1099  | 8.642203333 |
| ANXA10    | NM_007193    | chr4  | + | 169011705 | 169110894 | 2548  | 1138  | 8.641663333 |
| EFNA5     | NM_001962    | chr5  | - | 106710588 | 107008597 | 10694 | 10218 | 8.62335     |
| KCNK2     | NM_014217    | chr1  | + | 215254558 | 215412437 | 3723  | 1853  | 8.620786667 |
| BEST4     | NM_153274    | chr1  | - | 45247255  | 45255427  | 2172  | 2086  | 8.61789     |
| CYP2J2    | NM_000775    | chr1  | - | 60356978  | 60394424  | 1481  | 589   | 8.61358     |

|         |              |       |   |           |           |       |       |             |
|---------|--------------|-------|---|-----------|-----------|-------|-------|-------------|
| FGF12   | NM_021032    | chr3  | - | 191857682 | 192128839 | 3896  | 2863  | 8.598336667 |
| OR52M1  | NM_001004137 | chr11 | + | 4564419   | 4569375   | 469   | 135   | 8.596756667 |
| NECAB1  | NM_022351    | chr8  | + | 91801919  | 91973631  | 2047  | 901   | 8.59323     |
| FAM153B | NM_001079529 | chr5  | + | 175509907 | 175545458 | 443   | 0     | 8.591026667 |
| ZNF235  | NM_004234    | chr19 | - | 44788499  | 44811179  | 1148  | 1123  | 8.575633333 |
| ORMDL1  | NM_016467    | chr2  | - | 190632991 | 190651098 | 1333  | 1327  | 8.566566667 |
| CLEC18C | NM_173619    | chr16 | + | 70205926  | 70222799  | 1287  | 540   | 8.56377     |
| ZNF718  | NM_001039127 | chr4  | + | 51275     | 158491    | 3545  | 3331  | 8.56277     |
| SPATA12 | NM_181727    | chr3  | + | 57092467  | 57111461  | 1552  | 1234  | 8.557803333 |
| LIPT2   | NM_001144869 | chr11 | - | 74200921  | 74206756  | 1598  | 1453  | 8.556363333 |
| SYNJ1   | NM_203446    | chr21 | - | 33999067  | 34102352  | 3718  | 3324  | 8.554113333 |
| FERD3L  | NM_152898    | chr7  | - | 19182403  | 19187045  | 259   | 143   | 8.553913333 |
| KLHDC7A | NM_152375    | chr1  | + | 18805422  | 18814481  | 2277  | 2061  | 8.55252     |
| TRIM61  | NM_001012414 | chr4  | - | 165873596 | 165900819 | 2164  | 1481  | 8.548256667 |
| NOX4    | NM_016931    | chr11 | - | 89055520  | 89226654  | 3223  | 1047  | 8.545666667 |
| SLC18A1 | NM_003053    | chr8  | - | 20000364  | 20042718  | 1745  | 856   | 8.5433      |
| ZNF662  | NM_207404    | chr3  | + | 42945400  | 42962826  | 1111  | 913   | 8.53554     |
| TCEAL5  | NM_001012979 | chrX  | - | 102526616 | 102533798 | 272   | 0     | 8.530966667 |
| ACSM2B  | NM_182617    | chr16 | - | 20546081  | 20589696  | 749   | 451   | 8.52046     |
| ACCN1   | NM_183377    | chr17 | - | 31338104  | 31622007  | 15873 | 12014 | 8.51793     |
| ITGA1   | NM_181501    | chr5  | + | 52082134  | 52251486  | 4983  | 4804  | 8.517926667 |
| ZNF790  | NM_206894    | chr19 | - | 37306329  | 37331285  | 1370  | 1278  | 8.514793333 |
| ODZ2    | NM_001122679 | chr5  | + | 166709841 | 167693163 | 20587 | 19343 | 8.502196667 |
| PSKH2   | NM_033126    | chr8  | - | 87058689  | 87083852  | 311   | 0     | 8.497056667 |



|           |              |       |   |           |           |      |      |             |
|-----------|--------------|-------|---|-----------|-----------|------|------|-------------|
| TMEM168   | NM_022484    | chr7  | - | 112403785 | 112432479 | 1784 | 1684 | 8.48736     |
| SLIT2     | NM_004787    | chr4  | + | 20253233  | 20622789  | 9307 | 7416 | 8.468766667 |
| USP51     | NM_201286    | chrX  | - | 55509047  | 55517632  | 1900 | 1896 | 8.464683333 |
| PTN       | NM_002825    | chr7  | - | 136910090 | 137030547 | 1669 | 646  | 8.46368     |
| COL11A1   | NM_080630    | chr1  | - | 103340021 | 103576053 | 2830 | 1790 | 8.46094     |
| GABRP     | NM_014211    | chr5  | + | 170208721 | 170243051 | 1744 | 1360 | 8.447533333 |
| C8orf48   | NM_001007090 | chr8  | + | 13422350  | 13427798  | 675  | 512  | 8.43731     |
| IL1RAP    | NM_134470    | chr3  | + | 190229838 | 190350074 | 4043 | 4025 | 8.428566667 |
| LYG1      | NM_174898    | chr2  | - | 99898699  | 99919640  | 328  | 0    | 8.423503333 |
| RIMBP3B   | NM_001128635 | chr22 | + | 21736038  | 21745456  | 1655 | 272  | 8.421826667 |
| DTWD1     | NM_020234    | chr15 | + | 49911224  | 49939334  | 1238 | 1200 | 8.4137      |
| SPATA17   | NM_138796    | chr1  | + | 217802693 | 218042485 | 2722 | 1649 | 8.41058     |
| C2orf15   | NM_144706    | chr2  | + | 99756183  | 99769929  | 1301 | 1275 | 8.400713333 |
| SOX11     | NM_003108    | chr2  | + | 5830797   | 5843518   | 5212 | 4965 | 8.390413333 |
| ILDR2     | NM_199351    | chr1  | - | 166885994 | 166946562 | 4446 | 4056 | 8.384896667 |
| NGF       | NM_002506    | chr1  | - | 115826535 | 115882858 | 4157 | 3612 | 8.38479     |
| ANKRD34B  | NM_001004441 | chr5  | - | 79850572  | 79868305  | 2560 | 1832 | 8.366906667 |
| CSTF2T    | NM_015235    | chr10 | - | 53453244  | 53461356  | 1167 | 907  | 8.364336667 |
| USP15     | NM_006313    | chr12 | + | 62652185  | 62801899  | 1841 | 1641 | 8.359253333 |
| ANKRD20A3 | NM_001012419 | chr9  | - | 43087970  | 43135545  | 541  | 437  | 8.34319     |
| SPC25     | NM_020675    | chr2  | - | 169725399 | 169748945 | 928  | 706  | 8.326946667 |
| PF4       | NM_002619    | chr4  | - | 74844794  | 74849716  | 712  | 427  | 8.318713333 |
| ARL14     | NM_025047    | chr3  | + | 160392946 | 160398236 | 470  | 463  | 8.318076667 |
| SERPINB3  | NM_006919    | chr18 | - | 61320429  | 61331198  | 502  | 0    | 8.31625     |

|           |              |       |   |           |           |       |       |             |
|-----------|--------------|-------|---|-----------|-----------|-------|-------|-------------|
| PRLHR     | NM_004248    | chr10 | - | 120350914 | 120357161 | 2171  | 1733  | 8.31088     |
| ZNF330    | NM_014487    | chr4  | + | 142140047 | 142157851 | 1424  | 1127  | 8.305356667 |
| PCDHAC2   | NM_031883    | chr5  | + | 140344350 | 140351007 | 692   | 583   | 8.303953333 |
| IL20RB    | NM_144717    | chr3  | + | 136674705 | 136731921 | 2674  | 2644  | 8.303576667 |
| SPIN3     | NM_001010862 | chrX  | - | 57015262  | 57023989  | 1282  | 1183  | 8.30324     |
| KIAA1524  | NM_020890    | chr3  | - | 108266716 | 108310492 | 1226  | 1092  | 8.302336667 |
| LRRC52    | NM_001005214 | chr1  | + | 165511476 | 165535186 | 402   | 167   | 8.283746667 |
| SLC35F3   | NM_173508    | chr1  | + | 234038677 | 234462263 | 14980 | 14337 | 8.28287     |
| FBXL17    | NM_001163315 | chr5  | - | 107192732 | 107719800 | 7056  | 6966  | 8.279616667 |
| OPN1MW    | NM_000513    | chrX  | + | 153446083 | 153464353 | 81    | 0     | 8.275933333 |
| ZNF577    | NM_032679    | chr19 | - | 52372549  | 52393230  | 851   | 786   | 8.267206667 |
| SLITRK3   | NM_014926    | chr3  | - | 164902506 | 164916470 | 1595  | 354   | 8.265353333 |
| RG9MTD2   | NM_152292    | chr4  | - | 100465862 | 100486826 | 1462  | 1199  | 8.264903333 |
| DNAJC12   | NM_201262    | chr10 | - | 69568964  | 69599938  | 1148  | 741   | 8.25743     |
| ZNF202    | NM_003455    | chr11 | - | 123592995 | 123614364 | 1935  | 1900  | 8.24553     |
| PELO      | NM_015946    | chr5  | + | 52081772  | 52100453  | 2488  | 2293  | 8.231923333 |
| TIMD4     | NM_138379    | chr5  | - | 156344291 | 156392267 | 920   | 767   | 8.223426667 |
| PCDH10    | NM_032961    | chr4  | + | 134068468 | 134114733 | 5076  | 1344  | 8.214736667 |
| C1orf161  | NM_152367    | chr1  | + | 116652374 | 116679862 | 2037  | 1955  | 8.202723333 |
| C14orf105 | NM_018168    | chr14 | - | 57934593  | 57962577  | 1368  | 1251  | 8.197293333 |
| VTCN1     | NM_024626    | chr1  | - | 117684207 | 117755550 | 2626  | 1817  | 8.17842     |
| CSMD3     | NM_198124    | chr8  | - | 113233157 | 114391383 | 1233  | 761   | 8.168913333 |
| FAM92A1   | NM_145269    | chr8  | + | 94710771  | 94742672  | 1909  | 1643  | 8.157553333 |
| C11orf45  | NM_145013    | chr11 | - | 128767458 | 128777593 | 3615  | 2155  | 8.154063333 |

|          |              |       |   |           |           |       |       |             |
|----------|--------------|-------|---|-----------|-----------|-------|-------|-------------|
| FAT4     | NM_024582    | chr4  | + | 126235565 | 126416088 | 4223  | 3479  | 8.149796667 |
| PDGFD    | NM_033135    | chr11 | - | 103775912 | 104037028 | 4912  | 3954  | 8.146963333 |
| UGT2A3   | NM_024743    | chr4  | - | 69792175  | 69819510  | 362   | 0     | 8.132733333 |
| CDKN2B   | NM_078487    | chr9  | - | 22000900  | 22011313  | 1749  | 1669  | 8.12908     |
| HACE1    | NM_020771    | chr6  | - | 105173966 | 105309795 | 2595  | 2272  | 8.098266667 |
| EPHA6    | NM_173655    | chr3  | + | 97156488  | 97369422  | 869   | 305   | 8.09539     |
| ZNF177   | NM_003451    | chr19 | + | 9471694   | 9495294   | 429   | 297   | 8.094753333 |
| ZNF708   | NM_021269    | chr19 | - | 21471961  | 21514213  | 839   | 783   | 8.090926667 |
| FAM117B  | NM_173511    | chr2  | + | 203497899 | 203636481 | 2778  | 2645  | 8.077053333 |
| HERC5    | NM_016323    | chr4  | + | 89376266  | 89429315  | 1336  | 1219  | 8.069643333 |
| ACTBL2   | NM_001017992 | chr5  | - | 56773841  | 56780637  | 758   | 0     | 8.069193333 |
| KSR2     | NM_173598    | chr12 | - | 117888815 | 118408029 | 18727 | 16295 | 8.062223333 |
| ZNF585A  | NM_199126    | chr19 | - | 37638999  | 37665334  | 792   | 781   | 8.058466667 |
| C5orf49  | NM_001089584 | chr5  | - | 7829509   | 7853265   | 2213  | 1822  | 8.03249     |
| PTX3     | NM_002852    | chr3  | + | 157152578 | 157163418 | 2139  | 1516  | 8.03157     |
| PPFIA2   | NM_003625    | chr12 | - | 81651354  | 82155110  | 3932  | 2456  | 8.020926667 |
| C6orf170 | NM_152730    | chr6  | - | 121398625 | 121657645 | 1535  | 1451  | 8.017136667 |
| DSEL     | NM_032160    | chr18 | - | 65171817  | 65185968  | 1672  | 1541  | 8.011056667 |
| TRPC1    | NM_003304    | chr3  | + | 142441264 | 142528730 | 1754  | 1543  | 8.003906667 |
| PTGS2    | NM_000963    | chr1  | - | 186638942 | 186651560 | 987   | 986   | 7.990313333 |
| FANCF    | NM_022725    | chr11 | - | 22642077  | 22649388  | 1465  | 1385  | 7.98393     |
| C1orf114 | NM_021179    | chr1  | - | 169362112 | 169398671 | 522   | 321   | 7.982126667 |
| MFSD6L   | NM_152599    | chr17 | - | 8698426   | 8704668   | 426   | 133   | 7.97743     |
| PMAIP1   | NM_021127    | chr18 | + | 57565190  | 57573539  | 2682  | 2492  | 7.970483333 |

|           |              |       |   |           |           |      |      |             |
|-----------|--------------|-------|---|-----------|-----------|------|------|-------------|
| H2AFB1    | NM_001017990 | chrX  | + | 154111315 | 154115834 | 1070 | 0    | 7.969603333 |
| ANKRD20A1 | NM_032250    | chr9  | + | 67924759  | 67971841  | 444  | 0    | 7.968853333 |
| APOOL     | NM_198450    | chrX  | + | 84256896  | 84350325  | 1658 | 1501 | 7.95892     |
| OSBPL6    | NM_145739    | chr2  | + | 179182969 | 179262876 | 696  | 357  | 7.958546667 |
| SYCP3     | NM_153694    | chr12 | - | 102120424 | 102135251 | 160  | 0    | 7.954966667 |
| XAGE3     | NM_133179    | chrX  | - | 52889556  | 52899120  | 25   | 0    | 7.947006667 |
| IFI27     | NM_005532    | chr14 | + | 94575077  | 94585034  | 767  | 702  | 7.93915     |
| ZNF347    | NM_032584    | chr19 | - | 53639955  | 53664323  | 1436 | 987  | 7.936873333 |
| H2AFB2    | NM_001017991 | chrX  | + | 154608434 | 154612784 | 1030 | 259  | 7.906906667 |
| EXOC8     | NM_175876    | chr1  | - | 231466480 | 231475579 | 2109 | 2099 | 7.90503     |
| SLC22A2   | NM_003058    | chr6  | - | 160635792 | 160681964 | 1382 | 881  | 7.901396667 |
| ACSM5     | NM_017888    | chr16 | + | 20418854  | 20454282  | 1605 | 1604 | 7.879156667 |
| ENPP5     | NM_021572    | chr6  | - | 46125760  | 46140718  | 909  | 514  | 7.866266667 |
| ZNF596    | NM_173539    | chr8  | + | 180198    | 199340    | 1402 | 1391 | 7.8637      |
| KRT222    | NM_152349    | chr17 | - | 38809870  | 38823417  | 325  | 0    | 7.859013333 |
| PNMA6A    | NM_032882    | chrX  | + | 152238837 | 152244646 | 1208 | 603  | 7.853063333 |
| OR10H5    | NM_001004466 | chr19 | + | 15902857  | 15907807  | 226  | 0    | 7.851786667 |
| ATP6V0A4  | NM_130841    | chr7  | - | 138389037 | 138460783 | 2565 | 2519 | 7.850596667 |
| PRSS1     | NM_002769    | chr7  | + | 142455317 | 142462928 | 646  | 457  | 7.841913333 |
| ANKRD20A2 | NM_001012421 | chr9  | + | 42366301  | 42413411  | 352  | 0    | 7.841846667 |
| ZNF141    | NM_003441    | chr4  | + | 329594    | 369692    | 2838 | 2536 | 7.837766667 |
| LRRC19    | NM_022901    | chr9  | - | 26991133  | 27007692  | 501  | 0    | 7.836026667 |
| CXCL14    | NM_004887    | chr5  | - | 134904369 | 134916970 | 1654 | 1200 | 7.81933     |
| ATF7IP2   | NM_024997    | chr16 | + | 10520723  | 10579496  | 663  | 366  | 7.8186      |

|          |              |       |   |           |           |       |       |             |
|----------|--------------|-------|---|-----------|-----------|-------|-------|-------------|
| BANK1    | NM_017935    | chr4  | + | 102709762 | 102997970 | 3078  | 2657  | 7.818543333 |
| THSD7A   | NM_015204    | chr7  | - | 11408060  | 11873825  | 4112  | 3164  | 7.811536667 |
| SLC17A4  | NM_005495    | chr6  | + | 25752925  | 25783404  | 492   | 230   | 7.806203333 |
| LRR1Q1   | NM_032165    | chr12 | + | 85428097  | 85520637  | 1146  | 956   | 7.796276667 |
| MTNR1B   | NM_005959    | chr11 | + | 92700787  | 92717949  | 1702  | 764   | 7.790416667 |
| JPH1     | NM_020647    | chr8  | - | 75144937  | 75235563  | 4794  | 4620  | 7.787883333 |
| ZNF793   | NM_001013659 | chr19 | + | 37995839  | 38036240  | 1417  | 1188  | 7.771293333 |
| C6orf165 | NM_001031743 | chr6  | + | 88115688  | 88176192  | 1803  | 1791  | 7.766326667 |
| NMBR     | NM_002511    | chr6  | - | 142394743 | 142411937 | 490   | 414   | 7.763123333 |
| ZNF599   | NM_001007248 | chr19 | - | 35246977  | 35266135  | 994   | 991   | 7.744113333 |
| C2orf80  | NM_001099334 | chr2  | - | 209028069 | 209056774 | 771   | 759   | 7.743733333 |
| CACNA2D3 | NM_018398    | chr3  | + | 54154691  | 55110585  | 24344 | 20023 | 7.73848     |
| OR2S2    | NM_019897    | chr9  | - | 35955103  | 35960152  | 457   | 198   | 7.72102     |
| MEFV     | NM_000243    | chr16 | - | 3290026   | 3308628   | 1033  | 410   | 7.72083     |
| CLDN20   | NM_001001346 | chr6  | + | 155583145 | 155599683 | 642   | 445   | 7.716463333 |
| GBA3     | NM_020973    | chr4  | + | 22692546  | 22823193  | 1297  | 413   | 7.70968     |
| INSC     | NM_001042536 | chr11 | + | 15134482  | 15270755  | 6134  | 6117  | 7.69776     |
| TMEM232  | NM_001039763 | chr5  | - | 109753196 | 110064451 | 1093  | 888   | 7.696036667 |
| ZNF385B  | NM_152520    | chr2  | - | 180304709 | 180728233 | 6890  | 6565  | 7.69056     |
| SATB1    | NM_002971    | chr3  | - | 18387132  | 18468830  | 1900  | 1579  | 7.68808     |
| NRXN3    | NM_138970    | chr14 | + | 79743652  | 80332761  | 7121  | 1607  | 7.682996667 |
| MYO3A    | NM_017433    | chr10 | + | 26221000  | 26503466  | 2045  | 1056  | 7.678856667 |
| DEFB4A   | NM_004942    | chr8  | + | 7750197   | 7756238   | 731   | 189   | 7.676706667 |
| ZNF10    | NM_015394    | chr12 | + | 133705212 | 133738050 | 1232  | 1223  | 7.666333333 |

|          |              |       |   |           |           |      |      |             |
|----------|--------------|-------|---|-----------|-----------|------|------|-------------|
| KRT71    | NM_033448    | chr12 | - | 52935691  | 52948932  | 1065 | 948  | 7.64365     |
| C10orf68 | NM_024688    | chr10 | + | 32854649  | 33173793  | 1810 | 1501 | 7.643406667 |
| LINGO2   | NM_152570    | chr9  | - | 27946526  | 28721304  | 1898 | 747  | 7.6351      |
| CNTF     | NM_000614    | chr11 | + | 58388144  | 58395206  | 596  | 42   | 7.628703333 |
| C5orf43  | NM_001048249 | chr5  | - | 60451534  | 60460303  | 1312 | 1193 | 7.626503333 |
| PKHD1    | NM_170724    | chr6  | - | 51583645  | 51954424  | 5922 | 2886 | 7.61982     |
| C6orf225 | NM_001033564 | chr6  | + | 112406672 | 112425994 | 995  | 951  | 7.61896     |
| FOLH1    | NM_004476    | chr11 | - | 49166185  | 49232223  | 1562 | 672  | 7.617233333 |
| SCGB1D4  | NM_206998    | chr11 | - | 62061752  | 62068537  | 468  | 427  | 7.605303333 |
| WISP3    | NM_198239    | chr6  | + | 112373369 | 112392888 | 285  | 0    | 7.600693333 |
| ANAPC10  | NM_014885    | chr4  | - | 145914311 | 146021369 | 2423 | 2046 | 7.577823333 |
| HIST2H3D | NM_001123375 | chr1  | - | 149782778 | 149787237 | 282  | 0    | 7.567716667 |
| DPPA4    | NM_018189    | chr3  | - | 109042986 | 109058420 | 376  | 113  | 7.561973333 |
| ITIH2    | NM_002216    | chr10 | + | 7743234   | 7793484   | 446  | 0    | 7.56015     |
| INHBA    | NM_002192    | chr7  | - | 41726599  | 41744707  | 3281 | 2412 | 7.552276667 |
| C11orf93 | NM_001136105 | chr11 | + | 111167974 | 111181354 | 1985 | 1835 | 7.542083333 |
| CCDC54   | NM_032600    | chr3  | + | 107094186 | 107099482 | 474  | 36   | 7.536353333 |
| TLL1     | NM_012464    | chr4  | + | 166792408 | 167026994 | 4500 | 3042 | 7.53516     |
| TMEM174  | NM_153217    | chr5  | + | 72467021  | 72472971  | 333  | 0    | 7.524673333 |
| CALCRL   | NM_005795    | chr2  | - | 188205847 | 188315022 | 968  | 723  | 7.520716667 |
| CERKL    | NM_201548    | chr2  | - | 182399399 | 182523835 | 1915 | 1523 | 7.518376667 |
| ZFP57    | NM_001109809 | chr6  | - | 29638167  | 29646932  | 685  | 372  | 7.511043333 |
| CNTN5    | NM_175566    | chr11 | + | 98889869  | 100229474 | 4146 | 649  | 7.507283333 |
| KCNJ5    | NM_000890    | chr11 | + | 128759311 | 128789952 | 7241 | 5698 | 7.506706667 |

|          |              |       |   |           |           |      |      |             |
|----------|--------------|-------|---|-----------|-----------|------|------|-------------|
| FAM151B  | NM_205548    | chr5  | + | 79781798  | 79840207  | 1353 | 1253 | 7.50341     |
| CYP39A1  | NM_016593    | chr6  | - | 46515443  | 46622524  | 1725 | 1351 | 7.496613333 |
| GUCY1A2  | NM_000855    | chr11 | - | 106555908 | 106891172 | 5284 | 2988 | 7.48635     |
| FAM189A2 | NM_004816    | chr9  | + | 71942239  | 72009371  | 2185 | 960  | 7.471203333 |
| KRT23    | NM_015515    | chr17 | - | 39076950  | 39095837  | 1262 | 916  | 7.471093333 |
| RNF175   | NM_173662    | chr4  | - | 154629310 | 154683388 | 2843 | 1937 | 7.468826667 |
| SLC14A2  | NM_007163    | chr18 | + | 43192764  | 43265061  | 5264 | 5136 | 7.462763333 |
| GPR137C  | NM_001099652 | chr14 | + | 53017864  | 53106432  | 2856 | 2505 | 7.4423      |
| C11orf87 | NM_207645    | chr11 | + | 109290844 | 109301894 | 1900 | 1296 | 7.441846667 |
| PANX3    | NM_052959    | chr11 | + | 124479451 | 124492252 | 181  | 130  | 7.429723333 |
| KRT76    | NM_015848    | chr12 | - | 53159937  | 53173130  | 474  | 168  | 7.4267      |
| POLR3B   | NM_018082    | chr12 | + | 106749434 | 106905977 | 3394 | 2828 | 7.423713333 |
| NCF1     | NM_000265    | chr7  | + | 74186307  | 74205660  | 1229 | 603  | 7.423583333 |
| RASGEF1B | NM_152545    | chr4  | - | 82346217  | 82395062  | 2384 | 2027 | 7.42119     |
| DEFB125  | NM_153325    | chr20 | + | 66349     | 79297     | 347  | 0    | 7.41848     |
| DPPA2    | NM_138815    | chr3  | - | 109010633 | 109037365 | 351  | 287  | 7.417943333 |
| ARHGEF38 | NM_017700    | chr4  | + | 106471775 | 106554838 | 2759 | 1039 | 7.414583333 |
| CRISPLD1 | NM_031461    | chr8  | + | 75894706  | 75948794  | 2138 | 757  | 7.406186667 |
| ZNF845   | NM_138374    | chr19 | + | 53835000  | 53860123  | 1331 | 1331 | 7.393286667 |
| EPHA7    | NM_004440    | chr6  | - | 93947738  | 94131301  | 3576 | 2591 | 7.388303333 |
| HEATR7B2 | NM_173489    | chr5  | - | 40996120  | 41073445  | 64   | 0    | 7.384906667 |
| DAPL1    | NM_001017920 | chr2  | + | 159649827 | 159674497 | 1981 | 578  | 7.38351     |
| SLC45A2  | NM_016180    | chr5  | - | 33942719  | 33986781  | 891  | 872  | 7.379783333 |
| ITGA4    | NM_000885    | chr2  | + | 182319617 | 182404469 | 1541 | 1380 | 7.376936667 |

|          |              |       |   |           |           |       |      |             |
|----------|--------------|-------|---|-----------|-----------|-------|------|-------------|
| CNTN1    | NM_175038    | chr12 | + | 41084356  | 41466095  | 3286  | 1536 | 7.37438     |
| C9orf66  | NM_152569    | chr9  | - | 211106    | 217894    | 1406  | 1165 | 7.371676667 |
| DNAH7    | NM_018897    | chr2  | - | 196600425 | 196935537 | 3325  | 3268 | 7.36405     |
| C10orf67 | NM_153714    | chr10 | - | 23603518  | 23635773  | 1964  | 1316 | 7.36169     |
| KRT31    | NM_002277    | chr17 | - | 39547975  | 39555845  | 315   | 240  | 7.35927     |
| MPP7     | NM_173496    | chr10 | - | 28337921  | 28573068  | 3397  | 3346 | 7.356656667 |
| ADAMTS16 | NM_139056    | chr5  | + | 5138441   | 5322413   | 6089  | 3611 | 7.352233333 |
| OR51G2   | NM_001005238 | chr11 | - | 4933947   | 4938894   | 480   | 152  | 7.350033333 |
| MURC     | NM_001018116 | chr9  | + | 103338334 | 103352174 | 790   | 671  | 7.347213333 |
| PCDH20   | NM_022843    | chr13 | - | 61981817  | 61991656  | 2043  | 709  | 7.33975     |
| EDNRB    | NM_003991    | chr13 | - | 78467614  | 78494967  | 1800  | 1529 | 7.334076667 |
| PPP2R2B  | NM_181678    | chr5  | - | 145967066 | 146463034 | 3583  | 3015 | 7.325846667 |
| ADAM22   | NM_021723    | chr7  | + | 87561700  | 87828450  | 3600  | 2004 | 7.31599     |
| PRSS55   | NM_198464    | chr8  | + | 10381054  | 10398334  | 791   | 401  | 7.29941     |
| IFNA1    | NM_024013    | chr9  | + | 21438438  | 21443316  | 54    | 0    | 7.2863      |
| CALCA    | NM_001741    | chr11 | - | 14988046  | 14995833  | 2478  | 805  | 7.268536667 |
| FBXO8    | NM_012180    | chr4  | - | 175155808 | 175207403 | 1927  | 1614 | 7.260073333 |
| CTNND2   | NM_001332    | chr5  | - | 10969950  | 11906111  | 11854 | 4333 | 7.250223333 |
| ARMC4    | NM_018076    | chr10 | - | 28099095  | 28289978  | 2887  | 2031 | 7.24758     |
| RNF2     | NM_007212    | chr1  | + | 185012549 | 185073741 | 2511  | 1790 | 7.24682     |
| ST8SIA4  | NM_175052    | chr5  | - | 100219013 | 100240971 | 2576  | 704  | 7.2343      |
| RYR3     | NM_001036    | chr15 | + | 33601175  | 34160304  | 14301 | 7334 | 7.233426667 |
| MAB21L2  | NM_006439    | chr4  | + | 151501075 | 151507846 | 298   | 244  | 7.223663333 |
| CRH      | NM_000756    | chr8  | - | 67086610  | 67092847  | 1125  | 1090 | 7.222423333 |



|          |              |       |   |           |           |      |      |             |
|----------|--------------|-------|---|-----------|-----------|------|------|-------------|
| BMP5     | NM_021073    | chr6  | - | 55618236  | 55742376  | 1548 | 1183 | 7.22171     |
| RAG1     | NM_000448    | chr11 | + | 36587561  | 36603311  | 558  | 0    | 7.217613333 |
| FOLH1B   | NM_153696    | chr11 | + | 89390463  | 89433887  | 451  | 53   | 7.199763333 |
| S100A8   | NM_002964    | chr1  | - | 153360506 | 153365550 | 290  | 0    | 7.190516667 |
| SFTPA2   | NM_001098668 | chr10 | - | 81313606  | 81322164  | 925  | 741  | 7.167826667 |
| GYS2     | NM_021957    | chr12 | - | 21687121  | 21759782  | 745  | 345  | 7.161156667 |
| C9orf71  | NM_153237    | chr9  | - | 71149496  | 71157784  | 396  | 218  | 7.15929     |
| CCKAR    | NM_000730    | chr4  | - | 26481016  | 26494043  | 504  | 232  | 7.14076     |
| RPA3     | NM_002947    | chr7  | - | 7674573   | 7760239   | 3454 | 2997 | 7.131253333 |
| FAM71B   | NM_130899    | chr5  | - | 156587342 | 156595280 | 510  | 291  | 7.130626667 |
| TPTE     | NM_199261    | chr21 | - | 10904741  | 10992921  | 1233 | 683  | 7.121176667 |
| ACADL    | NM_001608    | chr2  | - | 211050714 | 211092216 | 2043 | 1195 | 7.08747     |
| LRRC4C   | NM_020929    | chr11 | - | 40133751  | 40317665  | 2600 | 935  | 7.07297     |
| KRT79    | NM_175834    | chr12 | - | 53213229  | 53230078  | 1706 | 1299 | 7.065403333 |
| SULT1E1  | NM_005420    | chr4  | - | 70704928  | 70727871  | 890  | 157  | 7.054636667 |
| GRIK2    | NM_175768    | chr6  | + | 101844859 | 102519959 | 2941 | 1443 | 7.053396667 |
| DUSP27   | NM_001080426 | chr1  | + | 167062085 | 167100403 | 1317 | 1300 | 7.0378      |
| KCNQ3    | NM_004519    | chr8  | - | 133139254 | 133495005 | 7311 | 7274 | 7.03728     |
| NOVA1    | NM_006491    | chr14 | - | 26937322  | 27068961  | 2106 | 1649 | 7.03382     |
| CYP4A22  | NM_001010969 | chr1  | + | 47601105  | 47616527  | 356  | 316  | 7.02836     |
| FRA10AC1 | NM_145246    | chr10 | - | 95425638  | 95464330  | 1624 | 1306 | 7.02298     |
| C11orf30 | NM_020193    | chr11 | + | 76154067  | 76264590  | 2405 | 2216 | 7.021296667 |
| ASTN1    | NM_207108    | chr1  | - | 176835952 | 177136025 | 4024 | 4006 | 7.01059     |
| SYT14    | NM_153262    | chr1  | + | 210109536 | 210339634 | 3114 | 2865 | 7.006193333 |

|          |              |       |   |           |           |       |      |             |
|----------|--------------|-------|---|-----------|-----------|-------|------|-------------|
| MAEL     | NM_032858    | chr1  | + | 166956517 | 166993448 | 307   | 0    | 7.005006667 |
| CRYGD    | NM_006891    | chr2  | - | 208984329 | 208991314 | 632   | 118  | 7.004726667 |
| GSC      | NM_173849    | chr14 | - | 95232558  | 95238500  | 2352  | 2075 | 7.001316667 |
| FAM81B   | NM_152548    | chr5  | + | 94725046  | 94788145  | 2518  | 854  | 6.998743333 |
| RTKN2    | NM_145307    | chr10 | - | 63950951  | 64030467  | 2759  | 2483 | 6.998536667 |
| DDX43    | NM_018665    | chr6  | + | 74102283  | 74129290  | 704   | 678  | 6.976933333 |
| SULT1C4  | NM_006588    | chr2  | + | 108992419 | 109006271 | 971   | 905  | 6.966126667 |
| C15orf32 | NM_153040    | chr15 | + | 93012905  | 93046348  | 473   | 0    | 6.962356667 |
| SNRPE    | NM_003094    | chr1  | + | 203828738 | 203842281 | 1626  | 1358 | 6.94875     |
| ZNF471   | NM_020813    | chr19 | + | 57017210  | 57042270  | 1442  | 1220 | 6.947133333 |
| SIRPB2   | NM_001134836 | chr20 | - | 1453234   | 1474234   | 1214  | 590  | 6.947126667 |
| IGSF5    | NM_001080444 | chr21 | + | 41115332  | 41176024  | 1332  | 519  | 6.938006667 |
| KRT37    | NM_003770    | chr17 | - | 39574807  | 39582823  | 525   | 358  | 6.92469     |
| GABRB1   | NM_000812    | chr4  | + | 47031293  | 47430448  | 2921  | 2225 | 6.91558     |
| GC       | NM_000583    | chr4  | - | 72605409  | 72651889  | 729   | 0    | 6.903153333 |
| FMO1     | NM_002021    | chr1  | + | 171215661 | 171257114 | 1605  | 1535 | 6.894933333 |
| LHFPL3   | NM_199000    | chr7  | + | 103967102 | 104551004 | 6743  | 6275 | 6.89033     |
| CSMD1    | NM_033225    | chr8  | - | 2790873   | 4854329   | 7388  | 6744 | 6.88385     |
| SORCS3   | NM_014978    | chr10 | + | 106398857 | 107026994 | 16991 | 3912 | 6.881363333 |
| CH25H    | NM_003956    | chr10 | - | 90963692  | 90969072  | 1505  | 1257 | 6.872543333 |
| LYZL4    | NM_144634    | chr3  | - | 42436573  | 42454066  | 116   | 0    | 6.859406667 |
| C11orf65 | NM_152587    | chr11 | - | 108251725 | 108340259 | 2376  | 1458 | 6.857273333 |
| DEPDC4   | NM_152317    | chr12 | - | 100644040 | 100662858 | 1918  | 1789 | 6.853966667 |
| IQUB     | NM_178827    | chr7  | - | 123090234 | 123176719 | 3472  | 2639 | 6.846893333 |

|         |              |       |   |           |           |      |      |             |
|---------|--------------|-------|---|-----------|-----------|------|------|-------------|
| ELAVL2  | NM_004432    | chr9  | - | 23688101  | 23828064  | 2134 | 1916 | 6.84502     |
| MDGA2   | NM_182830    | chr14 | - | 47306826  | 47814439  | 999  | 677  | 6.837626667 |
| ATOH1   | NM_005172    | chr4  | + | 94748076  | 94753143  | 1666 | 928  | 6.83708     |
| CNTNAP5 | NM_130773    | chr2  | + | 124780862 | 125674864 | 5117 | 2968 | 6.826883333 |
| TRIM40  | NM_138700    | chr6  | + | 30102508  | 30118513  | 377  | 255  | 6.824136667 |
| MAGEE2  | NM_138703    | chrX  | - | 75000821  | 75007080  | 219  | 38   | 6.819833333 |
| FCGR1B  | NM_001017986 | chr1  | - | 120924906 | 120937945 | 915  | 870  | 6.81264     |
| IFT57   | NM_018010    | chr3  | - | 107877657 | 107943418 | 1220 | 889  | 6.803266667 |
| IL7     | NM_000880    | chr8  | - | 79643003  | 79719759  | 1881 | 1513 | 6.80252     |
| LRRC66  | NM_001024611 | chr4  | - | 52857864  | 52885787  | 350  | 0    | 6.800823333 |
| SLFN13  | NM_144682    | chr17 | - | 33760113  | 33777857  | 2365 | 2269 | 6.798883333 |
| C8orf85 | NM_001025357 | chr8  | + | 117948462 | 117958240 | 630  | 603  | 6.792843333 |
| SLC16A9 | NM_194298    | chr10 | - | 61408520  | 61471650  | 2326 | 1993 | 6.782086667 |
| FAM171B | NM_177454    | chr2  | + | 187556787 | 187630513 | 1583 | 1535 | 6.78081     |
| CNTN6   | NM_014461    | chr3  | + | 1132627   | 1447279   | 2919 | 422  | 6.766636667 |
| RFPL1   | NM_021026    | chr22 | + | 29832570  | 29840445  | 637  | 65   | 6.766036667 |
| CYP4B1  | NM_001099772 | chr1  | + | 47262668  | 47287022  | 2170 | 0    | 6.764783333 |
| IL20RA  | NM_014432    | chr6  | - | 137319106 | 137368299 | 3108 | 2328 | 6.757263333 |
| CRNN    | NM_016190    | chr1  | - | 152379717 | 152388751 | 515  | 0    | 6.757066667 |
| ZNF233  | NM_181756    | chr19 | + | 44762074  | 44781469  | 949  | 515  | 6.737293333 |
| TAS2R38 | NM_176817    | chr7  | - | 141670429 | 141675574 | 89   | 0    | 6.735506667 |
| GJB5    | NM_005268    | chr1  | + | 35218719  | 35226113  | 1666 | 1081 | 6.72231     |
| ZNF43   | NM_003423    | chr19 | - | 21985750  | 22020971  | 864  | 862  | 6.722083333 |
| AOAH    | NM_001637    | chr7  | - | 36550547  | 36766155  | 5342 | 2339 | 6.718476667 |

|          |              |       |   |           |           |      |      |             |
|----------|--------------|-------|---|-----------|-----------|------|------|-------------|
| DEFB130  | NM_001037804 | chr8  | - | 12166469  | 12177826  | 57   | 0    | 6.702316667 |
| NRAP     | NM_198060    | chr10 | - | 115346581 | 115425806 | 2055 | 1240 | 6.69577     |
| ACRV1    | NM_020115    | chr11 | - | 125540227 | 125552943 | 102  | 0    | 6.691946667 |
| TNP1     | NM_003284    | chr2  | - | 217722180 | 217726783 | 38   | 0    | 6.688626667 |
| TRIM9    | NM_052978    | chr14 | - | 51460783  | 51564423  | 4057 | 3721 | 6.688133333 |
| OR10T2   | NM_001004475 | chr1  | - | 158366310 | 158371257 | 379  | 0    | 6.679003333 |
| GSTA5    | NM_153699    | chr6  | - | 52694539  | 52712894  | 859  | 509  | 6.678786667 |
| LYG2     | NM_175735    | chr2  | - | 99856709  | 99873571  | 911  | 0    | 6.665983333 |
| POU6F2   | NM_007252    | chr7  | + | 39015607  | 39506391  | 7587 | 4581 | 6.663856667 |
| SIAH3    | NM_198849    | chr13 | - | 46352414  | 46427847  | 5438 | 2676 | 6.6544      |
| PCDH7    | NM_032457    | chr4  | + | 30720035  | 31150424  | 5687 | 3281 | 6.637556667 |
| C6       | NM_001115131 | chr5  | - | 41140334  | 41263541  | 974  | 0    | 6.61537     |
| FCRL2    | NM_030764    | chr1  | - | 157713521 | 157748923 | 157  | 110  | 6.612503333 |
| LRAT     | NM_004744    | chr4  | + | 155663161 | 155676271 | 2942 | 736  | 6.60896     |
| SLC5A1   | NM_000343    | chr22 | + | 32437017  | 32511012  | 2413 | 1838 | 6.606013333 |
| SMR3A    | NM_012390    | chr4  | + | 71224491  | 71234824  | 103  | 0    | 6.601716667 |
| ANKK1    | NM_178510    | chr11 | + | 113256511 | 113273141 | 1594 | 792  | 6.58015     |
| F8       | NM_019863    | chrX  | - | 154062062 | 154116578 | 1327 | 984  | 6.574773333 |
| KCNH7    | NM_173162    | chr2  | - | 163277755 | 163697241 | 2105 | 1602 | 6.572356667 |
| HTR1B    | NM_000863    | chr6  | - | 78169946  | 78175121  | 1867 | 391  | 6.56779     |
| FLJ37543 | NM_173667    | chr5  | + | 60931634  | 61004363  | 1677 | 1399 | 6.561573333 |
| APLF     | NM_173545    | chr2  | + | 68692689  | 68809295  | 2681 | 2098 | 6.54479     |
| IQCF6    | NM_001143833 | chr3  | - | 51810575  | 51815010  | 292  | 86   | 6.52413     |
| IGSF10   | NM_178822    | chr3  | - | 151151776 | 151178498 | 1951 | 1573 | 6.50781     |

|           |              |       |   |           |           |       |       |             |
|-----------|--------------|-------|---|-----------|-----------|-------|-------|-------------|
| CCNH      | NM_001239    | chr5  | - | 86688080  | 86710837  | 1740  | 1397  | 6.505603333 |
| WDR16     | NM_145054    | chr17 | + | 9477942   | 9548777   | 3363  | 2873  | 6.50507     |
| MEP1A     | NM_005588    | chr6  | + | 46759092  | 46809520  | 842   | 113   | 6.500013333 |
| ANKRD31   | NM_001164443 | chr5  | - | 74362120  | 74534704  | 2348  | 1345  | 6.486586667 |
| HIST1H2AG | NM_021064    | chr6  | + | 27098815  | 27103315  | 1267  | 1185  | 6.47545     |
| PARK2     | NM_013988    | chr6  | - | 161766588 | 163150835 | 32226 | 19292 | 6.468696667 |
| NTRK2     | NM_006180    | chr9  | + | 87281464  | 87640506  | 10903 | 9481  | 6.46621     |
| TSPAN8    | NM_004616    | chr12 | - | 71516875  | 71553780  | 475   | 425   | 6.460593333 |
| RGS22     | NM_015668    | chr8  | - | 100971274 | 101120345 | 2041  | 1435  | 6.443663333 |
| ANXA13    | NM_004306    | chr8  | - | 124691032 | 124751648 | 2530  | 2490  | 6.443443333 |
| PAQR9     | NM_198504    | chr3  | - | 142678072 | 142684179 | 1546  | 1422  | 6.41949     |
| TIMP4     | NM_003256    | chr3  | - | 12192566  | 12202648  | 1447  | 1119  | 6.41577     |
| ZC3H6     | NM_198581    | chr2  | + | 113031176 | 113099641 | 1430  | 1329  | 6.413413333 |
| ZMAT4     | NM_024645    | chr8  | - | 40386109  | 40757344  | 5639  | 4244  | 6.409296667 |
| KBTBD3    | NM_198439    | chr11 | - | 105919823 | 105950466 | 1143  | 1079  | 6.402593333 |
| FLRT2     | NM_013231    | chr14 | + | 85994486  | 86096271  | 5000  | 4633  | 6.393956667 |
| TAS2R14   | NM_023922    | chr12 | - | 11088851  | 11093807  | 317   | 222   | 6.39324     |
| FGF14     | NM_175929    | chr13 | - | 102371203 | 103056125 | 13223 | 7157  | 6.374593333 |
| FAM123A   | NM_199138    | chr13 | - | 25740670  | 25747858  | 1723  | 1222  | 6.368123333 |
| MTHFD2L   | NM_001144978 | chr4  | + | 75021827  | 75170815  | 3557  | 3349  | 6.346456667 |
| SPEF2     | NM_144722    | chr5  | + | 35615987  | 35673677  | 1387  | 1323  | 6.33451     |
| CDH18     | NM_004934    | chr5  | - | 19471153  | 19990354  | 2392  | 617   | 6.319633333 |
| OPRM1     | NM_001145287 | chr6  | + | 154405640 | 154442595 | 724   | 0     | 6.31322     |
| OR6Q1     | NM_001005186 | chr11 | + | 57796423  | 57801379  | 488   | 0     | 6.305476667 |

|         |              |       |   |           |           |      |      |             |
|---------|--------------|-------|---|-----------|-----------|------|------|-------------|
| CBLN2   | NM_182511    | chr18 | - | 70201913  | 70213724  | 3113 | 2990 | 6.304436667 |
| CLASP2  | NM_015097    | chr3  | - | 33535737  | 33761849  | 3262 | 3223 | 6.30385     |
| RPRM    | NM_019845    | chr2  | - | 154331850 | 154337323 | 2323 | 1619 | 6.299873333 |
| NPBWR1  | NM_005285    | chr8  | + | 53850466  | 53855455  | 2853 | 2455 | 6.27375     |
| FRMPD2  | NM_001018071 | chr10 | - | 49362600  | 49484942  | 4601 | 4031 | 6.27272     |
| DEFB131 | NM_001040448 | chr4  | + | 9444258   | 9454241   | 196  | 0    | 6.270706667 |
| DSG3    | NM_001944    | chr18 | + | 29025730  | 29060666  | 231  | 0    | 6.266193333 |
| TRPM6   | NM_017662    | chr9  | - | 77335409  | 77505011  | 3593 | 3050 | 6.26415     |
| ZNF474  | NM_207317    | chr5  | + | 121463213 | 121491267 | 1393 | 1353 | 6.260826667 |
| SCGB3A2 | NM_054023    | chr5  | + | 147256272 | 147263757 | 283  | 0    | 6.260793333 |
| TCP11   | NM_018679    | chr6  | - | 35083847  | 35111188  | 1525 | 1161 | 6.249923333 |
| SLITRK5 | NM_015567    | chr13 | + | 88322868  | 88333871  | 4569 | 1926 | 6.24441     |
| HTR1A   | NM_000524    | chr5  | - | 63254276  | 63259547  | 621  | 374  | 6.231       |
| KCNK18  | NM_181840    | chr10 | + | 118954998 | 118971811 | 881  | 160  | 6.211976667 |
| CST11   | NM_130794    | chr20 | - | 23429039  | 23435483  | 118  | 73   | 6.17327     |
| C5orf46 | NM_206966    | chr5  | - | 147270269 | 147288102 | 194  | 0    | 6.1605      |
| KCTD16  | NM_020768    | chr5  | + | 143548435 | 143858945 | 3988 | 3080 | 6.147406667 |
| SH3GL2  | NM_003026    | chr9  | + | 17576951  | 17799123  | 2479 | 1254 | 6.14092     |
| TINAG   | NM_014464    | chr6  | + | 54171201  | 54256951  | 981  | 432  | 6.137623333 |
| FCRL3   | NM_052939    | chr1  | - | 157645976 | 157672648 | 404  | 237  | 6.13325     |
| EML5    | NM_183387    | chr14 | - | 89079172  | 89261097  | 3547 | 3004 | 6.116703333 |
| KCNJ1   | NM_153767    | chr11 | - | 128705913 | 128739269 | 5093 | 2930 | 6.116663333 |
| IQCF1   | NM_152397    | chr3  | - | 51926890  | 51939387  | 382  | 0    | 6.116106667 |
| ERP27   | NM_152321    | chr12 | - | 15064974  | 15093464  | 510  | 349  | 6.11078     |

|           |              |       |   |           |           |      |      |             |
|-----------|--------------|-------|---|-----------|-----------|------|------|-------------|
| ADAMTS18  | NM_199355    | chr16 | - | 77314023  | 77471012  | 2990 | 2961 | 6.1088      |
| ADAM7     | NM_003817    | chr8  | + | 24296507  | 24368276  | 1005 | 352  | 6.09283     |
| CA3       | NM_005181    | chr8  | + | 86349054  | 86363268  | 1227 | 109  | 6.083006667 |
| CCDC11    | NM_145020    | chr18 | - | 47751561  | 47794866  | 1937 | 1335 | 6.082136667 |
| OR13J1    | NM_001004487 | chr9  | - | 35867458  | 35872399  | 403  | 0    | 6.07976     |
| EAF2      | NM_018456    | chr3  | + | 121552032 | 121607374 | 1627 | 1604 | 6.0765      |
| CALCB     | NM_000728    | chr11 | + | 15093144  | 15102178  | 2395 | 807  | 6.07011     |
| C4orf26   | NM_178497    | chr4  | + | 76479256  | 76491928  | 1140 | 1006 | 6.069723333 |
| FABP7     | NM_001446    | chr6  | + | 123098644 | 123107219 | 313  | 0    | 6.068493333 |
| SH3GL3    | NM_003027    | chr15 | + | 84114089  | 84289494  | 5301 | 4916 | 6.059283333 |
| TTR       | NM_000371    | chr18 | + | 29169728  | 29180987  | 980  | 436  | 6.054853333 |
| EFCAB1    | NM_024593    | chr8  | - | 49633951  | 49649871  | 985  | 564  | 6.05365     |
| RUNDC3B   | NM_138290    | chr7  | + | 87255727  | 87463614  | 2006 | 1867 | 6.047316667 |
| FGL1      | NM_201553    | chr8  | - | 17719898  | 17754914  | 430  | 336  | 6.042663333 |
| FAM110B   | NM_147189    | chr8  | + | 58905111  | 59064278  | 8567 | 7678 | 6.00724     |
| SEMA3D    | NM_152754    | chr7  | - | 84622870  | 84753248  | 828  | 559  | 6.00686     |
| C13orf35  | NM_207440    | chr13 | + | 113299356 | 113340812 | 2355 | 2052 | 6.006486667 |
| DSG4      | NM_177986    | chr18 | + | 28954738  | 28995881  | 809  | 227  | 6.00094     |
| LRRTM1    | NM_178839    | chr2  | - | 80527001  | 80533488  | 1752 | 1292 | 5.985626667 |
| EPHA5     | NM_182472    | chr4  | - | 66183279  | 66537654  | 2947 | 1868 | 5.973083333 |
| MCM9      | NM_153255    | chr6  | - | 119229760 | 119258304 | 1402 | 1228 | 5.967956667 |
| LOC643037 | NM_001190462 | chr11 | + | 94243693  | 94267290  | 1633 | 1241 | 5.966033333 |
| MC4R      | NM_005912    | chr18 | - | 58036562  | 58042002  | 571  | 411  | 5.964736667 |
| TTC29     | NM_031956    | chr4  | - | 147626177 | 147869035 | 1314 | 656  | 5.954533333 |

|           |              |       |   |           |           |      |      |             |
|-----------|--------------|-------|---|-----------|-----------|------|------|-------------|
| NPY       | NM_000905    | chr7  | + | 24321805  | 24333485  | 1710 | 889  | 5.95069     |
| C4orf39   | NM_153027    | chr4  | + | 165876098 | 165882274 | 1288 | 821  | 5.94499     |
| AFP       | NM_001134    | chr4  | + | 74299931  | 74323493  | 1292 | 1143 | 5.92978     |
| SPINK13   | NM_001040129 | chr5  | + | 147646421 | 147667774 | 1023 | 278  | 5.929196667 |
| NR3C2     | NM_001166104 | chr4  | - | 148997913 | 149365673 | 5912 | 4975 | 5.9225      |
| SLC2A13   | NM_052885    | chr12 | - | 40146821  | 40501662  | 5499 | 5304 | 5.91522     |
| PI15      | NM_015886    | chr8  | + | 75734770  | 75769265  | 672  | 431  | 5.90475     |
| DENND2C   | NM_198459    | chr1  | - | 115125194 | 115214733 | 1620 | 1526 | 5.900953333 |
| ZNF98     | NM_001098626 | chr19 | - | 22571897  | 22607149  | 661  | 606  | 5.891453333 |
| C4orf6    | NM_005750    | chr4  | + | 5524881   | 5531528   | 572  | 201  | 5.890843333 |
| GRXCR1    | NM_001080476 | chr4  | + | 42893281  | 43034674  | 1571 | 206  | 5.888733333 |
| SCGB2A1   | NM_002407    | chr11 | + | 61974138  | 61983412  | 738  | 267  | 5.88642     |
| HAO2      | NM_016527    | chr1  | + | 119909400 | 119938752 | 785  | 733  | 5.885893333 |
| SLC10A2   | NM_000452    | chr13 | - | 103694346 | 103721197 | 893  | 140  | 5.8844      |
| ADAMTS20  | NM_025003    | chr12 | - | 43746010  | 43947725  | 1183 | 708  | 5.879003333 |
| SERPINB4  | NM_002974    | chr18 | - | 61302491  | 61313503  | 494  | 139  | 5.86783     |
| KLKB1     | NM_000892    | chr4  | + | 187146670 | 187181626 | 500  | 394  | 5.862446667 |
| CYP4X1    | NM_178033    | chr1  | + | 47487238  | 47518424  | 1271 | 937  | 5.860453333 |
| CLDN25    | NM_001101389 | chr11 | + | 113648516 | 113653208 | 521  | 436  | 5.85886     |
| GRM7      | NM_181874    | chr3  | + | 6900800   | 7785219   | 8196 | 3990 | 5.857726667 |
| C3orf77   | NM_001145030 | chr3  | + | 44281376  | 44375591  | 859  | 809  | 5.847366667 |
| XIRP2     | NM_152381    | chr2  | + | 167757973 | 168118262 | 1925 | 1008 | 5.84554     |
| C14orf177 | NM_182560    | chr14 | + | 99175948  | 99186104  | 174  | 0    | 5.842276667 |
| GUCA1C    | NM_005459    | chr3  | - | 108624640 | 108674678 | 1984 | 457  | 5.8121      |



|          |              |       |   |           |           |       |      |             |
|----------|--------------|-------|---|-----------|-----------|-------|------|-------------|
| SCGB1D2  | NM_006551    | chr11 | + | 62007722  | 62014281  | 767   | 730  | 5.8119      |
| TDRD9    | NM_153046    | chr14 | + | 104392815 | 104521005 | 2790  | 2530 | 5.801546667 |
| C17orf77 | NM_152460    | chr17 | + | 72579055  | 72592349  | 196   | 118  | 5.79319     |
| C3orf30  | NM_152539    | chr3  | + | 118862995 | 118872303 | 500   | 433  | 5.78657     |
| IMPG1    | NM_001563    | chr6  | - | 76629060  | 76784336  | 1315  | 846  | 5.782016667 |
| SGCZ     | NM_139167    | chr8  | - | 13945371  | 15097793  | 1884  | 1511 | 5.78151     |
| GPR116   | NM_015234    | chr6  | - | 46818240  | 46924676  | 2607  | 2014 | 5.771003333 |
| SFTPA1   | NM_005411    | chr10 | + | 81368693  | 81377200  | 1563  | 1532 | 5.75822     |
| VWC2L    | NM_001080500 | chr2  | + | 215274459 | 215442654 | 2078  | 999  | 5.753863333 |
| PIK3C2G  | NM_004570    | chr12 | + | 18412472  | 18803353  | 2697  | 2219 | 5.739816667 |
| RGN      | NM_152869    | chrX  | + | 46935773  | 46954713  | 2188  | 2155 | 5.71291     |
| SLC27A6  | NM_014031    | chr5  | + | 128299208 | 128371336 | 906   | 766  | 5.70586     |
| SPICE1   | NM_144718    | chr3  | - | 113159563 | 113236035 | 2101  | 1790 | 5.701663333 |
| ATP13A5  | NM_198505    | chr3  | - | 192990829 | 193098515 | 1693  | 531  | 5.69588     |
| UCP1     | NM_021833    | chr4  | - | 141479048 | 141491960 | 1657  | 995  | 5.690673333 |
| CCDC129  | NM_194300    | chr7  | + | 31554976  | 31695304  | 329   | 328  | 5.687226667 |
| DYNLRB2  | NM_130897    | chr16 | + | 80572852  | 80586542  | 998   | 860  | 5.68312     |
| NPSR1    | NM_207173    | chr7  | + | 34695895  | 34919945  | 4676  | 4448 | 5.683096667 |
| CCL1     | NM_002981    | chr17 | - | 32685397  | 32692253  | 837   | 630  | 5.670763333 |
| PKD2L2   | NM_014386    | chr5  | + | 137223123 | 137278157 | 631   | 554  | 5.666293333 |
| GRIN2B   | NM_000834    | chr12 | - | 13712408  | 14135023  | 11586 | 2911 | 5.652796667 |
| RBP2     | NM_004164    | chr3  | - | 139169724 | 139197353 | 1290  | 221  | 5.649246667 |
| DCLK3    | NM_033403    | chr3  | - | 36751911  | 36783353  | 725   | 724  | 5.626766667 |
| FGF13    | NM_033642    | chrX  | - | 137711732 | 137823516 | 1957  | 1650 | 5.621776667 |

|          |              |       |   |           |           |       |       |             |
|----------|--------------|-------|---|-----------|-----------|-------|-------|-------------|
| MEOX2    | NM_005924    | chr7  | - | 15648835  | 15728309  | 1550  | 570   | 5.617513333 |
| CLCA4    | NM_012128    | chr1  | + | 87010757  | 87048433  | 459   | 0     | 5.616803333 |
| C9orf170 | NM_001001709 | chr9  | + | 89761557  | 89776642  | 1267  | 1020  | 5.604433333 |
| C8A      | NM_000562    | chr1  | + | 57318441  | 57385895  | 3211  | 2606  | 5.604096667 |
| NKAIN3   | NM_173688    | chr8  | + | 63159499  | 63905629  | 2769  | 2572  | 5.59882     |
| FGL2     | NM_006682    | chr7  | - | 76820686  | 76831151  | 599   | 572   | 5.597223333 |
| DKK2     | NM_014421    | chr4  | - | 107840957 | 107959454 | 2107  | 1483  | 5.591583333 |
| GABRG3   | NM_033223    | chr15 | + | 27214427  | 27780374  | 12209 | 10379 | 5.587266667 |
| FAM5B    | NM_021165    | chr1  | + | 177138631 | 177253559 | 4941  | 4384  | 5.583483333 |
| OTOL1    | NM_001080440 | chr3  | + | 161212594 | 161223731 | 434   | 0     | 5.571823333 |
| TMEM213  | NM_001085429 | chr7  | + | 138480737 | 138492770 | 676   | 155   | 5.544383333 |
| TDRD1    | NM_198795    | chr10 | + | 115937027 | 115994064 | 715   | 290   | 5.543323333 |
| ZNF804A  | NM_194250    | chr2  | + | 185461091 | 185806215 | 2932  | 1724  | 5.525923333 |
| C2orf40  | NM_032411    | chr2  | + | 106680111 | 106696610 | 598   | 0     | 5.505043333 |
| FCGR1A   | NM_000566    | chr1  | + | 149752248 | 149766075 | 1022  | 782   | 5.504243333 |
| PDZRN4   | NM_013377    | chr12 | + | 41829539  | 41970393  | 1206  | 955   | 5.499076667 |
| SCGB1D1  | NM_006552    | chr11 | + | 61955708  | 61963010  | 398   | 390   | 5.492763333 |
| CYP4Z1   | NM_178134    | chr1  | + | 47531158  | 47585993  | 1516  | 1307  | 5.489493333 |
| CACNA1E  | NM_000721    | chr1  | + | 181450714 | 181772716 | 7620  | 6560  | 5.48375     |
| SLC17A8  | NM_139319    | chr12 | + | 100748855 | 100817838 | 2017  | 1871  | 5.477936667 |
| FUT9     | NM_006581    | chr6  | + | 96461843  | 96665489  | 1308  | 788   | 5.477286667 |
| SNTG2    | NM_018968    | chr2  | + | 944552    | 1373385   | 11983 | 7224  | 5.470396667 |
| GPR111   | NM_153839    | chr6  | + | 47622324  | 47667534  | 1860  | 848   | 5.467583333 |
| SDR16C5  | NM_138969    | chr8  | - | 57210568  | 57235242  | 657   | 368   | 5.452346667 |

|          |              |       |   |           |           |      |      |             |
|----------|--------------|-------|---|-----------|-----------|------|------|-------------|
| AKR1C4   | NM_001818    | chr10 | + | 5236796   | 5262913   | 173  | 0    | 5.436963333 |
| NDUFA4   | NM_002489    | chr7  | - | 10970813  | 10981814  | 1609 | 1473 | 5.421543333 |
| C10orf90 | NM_001004298 | chr10 | - | 128111572 | 128212011 | 4453 | 3183 | 5.420523333 |
| PCDH17   | NM_001040429 | chr13 | + | 58203787  | 58305066  | 3787 | 2261 | 5.41307     |
| DEFB1    | NM_005218    | chr8  | - | 6726095   | 6737530   | 602  | 216  | 5.412643333 |
| C1QTNF7  | NM_031911    | chr4  | + | 15427627  | 15449792  | 248  | 121  | 5.410456667 |
| HTR3D    | NM_182537    | chr3  | + | 183747330 | 183759158 | 803  | 353  | 5.40968     |
| CYP2C9   | NM_000771    | chr10 | + | 96696413  | 96751149  | 515  | 199  | 5.40831     |
| SULT1C3  | NM_001008743 | chr2  | + | 108861649 | 108883808 | 558  | 0    | 5.40672     |
| TRHR     | NM_003301    | chr8  | + | 110097674 | 110133813 | 558  | 232  | 5.404086667 |
| DMP1     | NM_004407    | chr4  | + | 88569452  | 88587513  | 804  | 235  | 5.39372     |
| GKN1     | NM_019617    | chr2  | + | 69199703  | 69210113  | 93   | 0    | 5.38787     |
| FBXO39   | NM_153230    | chr17 | + | 6677550   | 6692966   | 646  | 631  | 5.384236667 |
| KLRK1    | NM_007360    | chr12 | - | 10522950  | 10544641  | 254  | 0    | 5.378533333 |
| ZCCHC13  | NM_203303    | chrX  | + | 73522023  | 73526870  | 289  | 67   | 5.36611     |
| TMEM195  | NM_001004320 | chr7  | - | 15237941  | 15603641  | 1549 | 1179 | 5.363106667 |
| CRYGB    | NM_005210    | chr2  | - | 209005295 | 209012878 | 78   | 0    | 5.358286667 |
| STEAP4   | NM_024636    | chr7  | - | 87903742  | 87938210  | 883  | 175  | 5.352076667 |
| SLC26A7  | NM_134266    | chr8  | + | 92259514  | 92408947  | 2085 | 1318 | 5.34671     |
| CTNNA3   | NM_013266    | chr10 | - | 67677723  | 69457950  | 6121 | 4164 | 5.345466667 |
| GRIA4    | NM_001112812 | chr11 | + | 105479409 | 105786232 | 3721 | 2297 | 5.33697     |
| MBL2     | NM_000242    | chr10 | - | 54523138  | 54533461  | 853  | 304  | 5.325776667 |
| QRFPR    | NM_198179    | chr4  | - | 122247795 | 122304182 | 1854 | 380  | 5.325543333 |
| TMEM196  | NM_152774    | chr7  | - | 19756936  | 19814405  | 1588 | 675  | 5.318046667 |

|          |              |       |   |           |           |       |       |             |
|----------|--------------|-------|---|-----------|-----------|-------|-------|-------------|
| CYTIP    | NM_004288    | chr2  | - | 158269129 | 158302605 | 319   | 263   | 5.31388     |
| KCNA4    | NM_002233    | chr11 | - | 30029763  | 30040489  | 855   | 400   | 5.312906667 |
| ABCB5    | NM_178559    | chr7  | + | 20684964  | 20798638  | 668   | 520   | 5.305126667 |
| ADAM30   | NM_021794    | chr1  | - | 120434154 | 120441114 | 282   | 147   | 5.29937     |
| TDRD6    | NM_001168359 | chr6  | + | 46653610  | 46674057  | 123   | 118   | 5.29416     |
| FAM19A1  | NM_213609    | chr3  | + | 68051452  | 68596772  | 1917  | 167   | 5.2916      |
| HRG      | NM_000412    | chr3  | + | 186381796 | 186398024 | 59    | 0     | 5.290763333 |
| TEX28    | NM_001586    | chrX  | - | 153496930 | 153525439 | 899   | 420   | 5.284883333 |
| ATP13A4  | NM_032279    | chr3  | - | 193117864 | 193274697 | 665   | 286   | 5.27979     |
| SLC30A10 | NM_018713    | chr1  | - | 220085604 | 220103994 | 2036  | 2009  | 5.279216667 |
| C5orf40  | NM_001001343 | chr5  | - | 156766605 | 156774730 | 838   | 621   | 5.278576667 |
| THSD7B   | NM_001080427 | chr2  | + | 137746460 | 138437288 | 4551  | 1267  | 5.276903333 |
| LRP1B    | NM_018557    | chr2  | - | 140986994 | 142891271 | 7814  | 4986  | 5.269043333 |
| AGBL4    | NM_032785    | chr1  | - | 48996525  | 50491627  | 14834 | 10944 | 5.261573333 |
| FAT3     | NM_001008781 | chr11 | + | 92083260  | 92631636  | 7519  | 4992  | 5.260423333 |
| CXorf57  | NM_018015    | chrX  | + | 105853158 | 105924674 | 1411  | 855   | 5.256323333 |
| VSTM1    | NM_198481    | chr19 | - | 54542078  | 54569208  | 303   | 0     | 5.252543333 |
| CRB1     | NM_201253    | chr1  | + | 197235332 | 197449586 | 1997  | 1151  | 5.239483333 |
| GSTA2    | NM_000846    | chr6  | - | 52612883  | 52630362  | 654   | 72    | 5.23877     |
| C8orf79  | NM_020844    | chr8  | + | 12801181  | 12889285  | 3788  | 3237  | 5.237116667 |
| GAP43    | NM_002045    | chr3  | + | 115340149 | 115442335 | 3331  | 3111  | 5.236653333 |
| NOL4     | NM_003787    | chr18 | - | 31429062  | 31805516  | 3274  | 2921  | 5.20967     |
| ZNF483   | NM_133464    | chr9  | + | 114285445 | 114308713 | 1258  | 1075  | 5.202453333 |
| APOH     | NM_000042    | chr17 | - | 64206145  | 64227557  | 323   | 279   | 5.198523333 |

|            |              |       |   |           |           |       |       |             |
|------------|--------------|-------|---|-----------|-----------|-------|-------|-------------|
| NCKAP5     | NM_207481    | chr2  | - | 133427370 | 134328032 | 15738 | 13980 | 5.19697     |
| KLRC2      | NM_002260    | chr12 | - | 10581204  | 10590593  | 419   | 185   | 5.195896667 |
| SLITRK6    | NM_032229    | chr13 | - | 86364920  | 86375484  | 265   | 116   | 5.186656667 |
| DHRS9      | NM_199204    | chr2  | + | 169921543 | 169954678 | 2872  | 2050  | 5.183496667 |
| FGF1       | NM_033137    | chr5  | - | 141969741 | 141995727 | 819   | 765   | 5.16702     |
| DBF4       | NM_006716    | chr7  | + | 87503542  | 87540857  | 1615  | 1492  | 5.162363333 |
| KLRC1      | NM_213658    | chr12 | - | 10596636  | 10609216  | 86    | 0     | 5.15463     |
| SLC28A3    | NM_022127    | chr9  | - | 86891090  | 86985414  | 4066  | 2988  | 5.148996667 |
| HHLA2      | NM_007072    | chr3  | + | 108019330 | 108099127 | 902   | 394   | 5.123023333 |
| GSTA1      | NM_145740    | chr6  | - | 52654176  | 52670665  | 461   | 166   | 5.1198      |
| RAG2       | NM_000536    | chr11 | - | 36611491  | 36621830  | 793   | 772   | 5.118173333 |
| PROK2      | NM_021935    | chr3  | - | 71818804  | 71836358  | 848   | 629   | 5.115       |
| SLC6A15    | NM_182767    | chr12 | - | 85251265  | 85308607  | 2395  | 1243  | 5.090433333 |
| TMPRSS11E  | NM_014058    | chr4  | + | 69311165  | 69365323  | 661   | 531   | 5.089206667 |
| MUM1L1     | NM_152423    | chrX  | + | 105410296 | 105454950 | 1369  | 0     | 5.078156667 |
| LRRN3      | NM_018334    | chr7  | + | 110729060 | 110767510 | 581   | 450   | 5.072023333 |
| MDH1B      | NM_001039845 | chr2  | - | 207600487 | 207632051 | 1116  | 1031  | 5.067656667 |
| AGXT2      | NM_031900    | chr5  | - | 34996204  | 35050241  | 3734  | 1949  | 5.06276     |
| ST6GALNAC3 | NM_152996    | chr1  | + | 76538387  | 77098670  | 6222  | 5288  | 5.060906667 |
| PXDNL      | NM_144651    | chr8  | - | 52230135  | 52724006  | 6095  | 5631  | 5.055203333 |
| S100A12    | NM_005621    | chr1  | - | 153344182 | 153350076 | 713   | 584   | 5.039206667 |
| OR10J5     | NM_001004469 | chr1  | - | 159502866 | 159507798 | 130   | 0     | 5.03398     |
| NRG3       | NM_001165973 | chr10 | + | 83635441  | 84748936  | 9500  | 4080  | 5.032486667 |
| KRT24      | NM_019016    | chr17 | - | 38852241  | 38862003  | 780   | 0     | 5.02987     |

|          |              |       |   |           |           |       |       |             |
|----------|--------------|-------|---|-----------|-----------|-------|-------|-------------|
| PLAC4    | NM_182832    | chr21 | - | 42545156  | 42559167  | 141   | 0     | 5.019246667 |
| ZBBX     | NM_024687    | chr3  | - | 166956075 | 167100072 | 650   | 504   | 5.01632     |
| FGF5     | NM_033143    | chr4  | + | 81185740  | 81214172  | 2669  | 2453  | 5.01561     |
| MOS      | NM_005372    | chr8  | - | 57023499  | 57028542  | 949   | 685   | 5.013323333 |
| STOML3   | NM_145286    | chr13 | - | 39538060  | 39566997  | 365   | 0     | 5.005576667 |
| FAM183A  | NM_001101376 | chr1  | + | 43611592  | 43624068  | 698   | 600   | 4.980273333 |
| C4orf31  | NM_024574    | chr4  | - | 121954780 | 121995674 | 1621  | 1280  | 4.979143333 |
| RNF148   | NM_198085    | chr7  | - | 122339718 | 122345022 | 120   | 0     | 4.975346667 |
| MPPED2   | NM_001584    | chr11 | - | 30429616  | 30604041  | 2062  | 403   | 4.97484     |
| PLCB1    | NM_182734    | chr20 | + | 8111294   | 8867548   | 15852 | 15783 | 4.94767     |
| KRT20    | NM_019010    | chr17 | - | 39030139  | 39043496  | 117   | 94    | 4.9472      |
| GABRB2   | NM_021911    | chr5  | - | 160713434 | 160977131 | 2632  | 2323  | 4.943196667 |
| AGTR1    | NM_032049    | chr3  | + | 148445965 | 148462791 | 670   | 161   | 4.943103333 |
| C1orf173 | NM_001002912 | chr1  | - | 75031793  | 75141423  | 1250  | 886   | 4.919833333 |
| GAD2     | NM_001134366 | chr10 | + | 26503234  | 26592049  | 2818  | 2755  | 4.919753333 |
| DSC3     | NM_024423    | chr18 | - | 28568050  | 28624782  | 2588  | 1343  | 4.917396667 |
| ZP4      | NM_021186    | chr1  | - | 238039162 | 238056223 | 733   | 0     | 4.89231     |
| C8orf45  | NM_173518    | chr8  | + | 67780982  | 67836284  | 1718  | 1479  | 4.888073333 |
| COL21A1  | NM_030820    | chr6  | - | 55919386  | 56114379  | 2339  | 1666  | 4.880486667 |
| IFLTD1   | NM_152590    | chr12 | - | 25627014  | 25708179  | 1347  | 1045  | 4.876443333 |
| PNLIPRP1 | NM_006229    | chr10 | + | 118348488 | 118370687 | 866   | 573   | 4.87596     |
| OGN      | NM_033014    | chr9  | - | 95144247  | 95168938  | 257   | 233   | 4.864266667 |
| C7orf71  | NM_001145531 | chr7  | + | 26675488  | 26688925  | 857   | 575   | 4.853873333 |
| TEDDM1   | NM_172000    | chr1  | - | 182365250 | 182371752 | 1054  | 576   | 4.831476667 |

|           |              |       |   |           |           |      |      |             |
|-----------|--------------|-------|---|-----------|-----------|------|------|-------------|
| PLA2G7    | NM_005084    | chr6  | - | 46670051  | 46705152  | 1872 | 1329 | 4.83087     |
| IFNK      | NM_020124    | chr9  | + | 27522310  | 27528497  | 409  | 214  | 4.817246667 |
| MAGEB4    | NM_002367    | chrX  | + | 30258055  | 30264309  | 98   | 0    | 4.811253333 |
| EYA1      | NM_172060    | chr8  | - | 72107666  | 72270980  | 1362 | 1230 | 4.799046667 |
| TAC1      | NM_013998    | chr7  | + | 97359269  | 97371785  | 1156 | 450  | 4.79203     |
| RNF180    | NM_178532    | chr5  | + | 63459669  | 63515340  | 1721 | 1708 | 4.78512     |
| KHDRBS2   | NM_152688    | chr6  | - | 62387863  | 62998101  | 897  | 837  | 4.784996667 |
| FAM71D    | NM_173526    | chr14 | + | 67654108  | 67697268  | 1147 | 784  | 4.77706     |
| GLP2R     | NM_004246    | chr17 | + | 9727379   | 9795023   | 4594 | 2887 | 4.775306667 |
| TNNI3K    | NM_015978    | chr1  | + | 74699083  | 75012109  | 1193 | 1127 | 4.770146667 |
| GRID2     | NM_001510    | chr4  | + | 93223548  | 94695650  | 4985 | 3289 | 4.752163333 |
| CFHR4     | NM_006684    | chr1  | + | 196855210 | 196889764 | 513  | 217  | 4.7432      |
| KCNJ3     | NM_002239    | chr2  | + | 155553091 | 155715015 | 1368 | 305  | 4.741693333 |
| C4orf37   | NM_174952    | chr4  | - | 98478023  | 99066392  | 3755 | 1954 | 4.734733333 |
| AQP4      | NM_004028    | chr18 | - | 24430006  | 24444576  | 792  | 480  | 4.734376667 |
| C10orf113 | NM_001177483 | chr10 | - | 21412690  | 21437489  | 391  | 315  | 4.716356667 |
| FIBIN     | NM_203371    | chr11 | + | 27013626  | 27020633  | 1373 | 1063 | 4.70228     |
| PRSS54    | NM_001080492 | chr16 | - | 58311899  | 58330952  | 434  | 264  | 4.697146667 |
| CD1B      | NM_001764    | chr1  | - | 158295738 | 158303322 | 224  | 158  | 4.689543333 |
| CD96      | NM_198196    | chr3  | + | 111258924 | 111373207 | 3290 | 2799 | 4.677676667 |
| DIRAS2    | NM_017594    | chr9  | - | 93370112  | 93407109  | 686  | 421  | 4.672206667 |
| DYDC1     | NM_138812    | chr10 | - | 82093860  | 82118501  | 911  | 325  | 4.651786667 |
| FBXO48    | NM_001024680 | chr2  | - | 68687503  | 68696391  | 2153 | 1208 | 4.642736667 |
| CDH7      | NM_033646    | chr18 | + | 63415486  | 63550176  | 1368 | 62   | 4.635853333 |

|          |              |       |   |           |           |      |      |             |
|----------|--------------|-------|---|-----------|-----------|------|------|-------------|
| DYDC2    | NM_032372    | chr10 | + | 82114556  | 82129830  | 911  | 325  | 4.634616667 |
| KRTAP4-7 | NM_033061    | chr17 | + | 39238457  | 39243397  | 538  | 516  | 4.630396667 |
| C9orf135 | NM_001010940 | chr9  | + | 72433729  | 72523149  | 2246 | 2154 | 4.622846667 |
| COLEC10  | NM_006438    | chr8  | + | 120077422 | 120121203 | 1050 | 886  | 4.622066667 |
| TSLP     | NM_033035    | chr5  | + | 110405388 | 110415723 | 2019 | 1965 | 4.61945     |
| IL22RA2  | NM_181310    | chr6  | - | 137462955 | 137496786 | 1770 | 1676 | 4.61457     |
| CYP2C18  | NM_001128925 | chr10 | + | 96441249  | 96497948  | 290  | 0    | 4.607646667 |
| HMGCLL1  | NM_019036    | chr6  | - | 55297169  | 55446013  | 979  | 508  | 4.57281     |
| HCRTR2   | NM_001526    | chr6  | + | 55037069  | 55149419  | 436  | 215  | 4.572323333 |
| IL12B    | NM_002187    | chr5  | - | 158739789 | 158759482 | 2090 | 1774 | 4.571823333 |
| AKR1D1   | NM_005989    | chr7  | + | 137759176 | 137805051 | 1009 | 499  | 4.567713333 |
| MTTP     | NM_000253    | chr4  | + | 100483238 | 100547155 | 1552 | 1120 | 4.555853333 |
| SLC30A8  | NM_173851    | chr8  | + | 118145335 | 118190954 | 234  | 159  | 4.553843333 |
| LMO3     | NM_018640    | chr12 | - | 16699305  | 16761432  | 1717 | 936  | 4.546366667 |
| CWH43    | NM_025087    | chr4  | + | 48986263  | 49066096  | 755  | 669  | 4.54235     |
| C9orf84  | NM_173521    | chr9  | - | 114446899 | 114547780 | 1376 | 591  | 4.535396667 |
| GPRC6A   | NM_148963    | chr6  | - | 117111246 | 117152199 | 230  | 169  | 4.529403333 |
| C3orf57  | NM_001040100 | chr3  | - | 161060578 | 161091872 | 2206 | 1920 | 4.525413333 |
| C13orf36 | NM_203451    | chr13 | + | 37246047  | 37273976  | 984  | 385  | 4.511733333 |
| CNBD1    | NM_173538    | chr8  | + | 87876674  | 88396956  | 2108 | 522  | 4.511163333 |
| C7       | NM_000587    | chr5  | + | 40907597  | 40985043  | 319  | 0    | 4.50509     |
| KRT27    | NM_181537    | chr17 | - | 38931058  | 38940787  | 279  | 267  | 4.50308     |
| SLC36A2  | NM_181776    | chr5  | - | 150692537 | 150729152 | 1412 | 1141 | 4.49875     |
| FOXR2    | NM_198451    | chrX  | + | 55647831  | 55654622  | 407  | 0    | 4.497933333 |



|          |              |       |   |           |           |      |      |             |
|----------|--------------|-------|---|-----------|-----------|------|------|-------------|
| KCNV1    | NM_014379    | chr8  | - | 110977231 | 110988960 | 2200 | 318  | 4.49178     |
| CCDC67   | NM_181645    | chr11 | + | 93061881  | 93173637  | 1504 | 963  | 4.486743333 |
| HCN1     | NM_021072    | chr5  | - | 45257350  | 45698221  | 2777 | 1127 | 4.481356667 |
| OR4F6    | NM_001005326 | chr15 | + | 102343921 | 102348862 | 686  | 324  | 4.480283333 |
| SLC7A3   | NM_032803    | chrX  | - | 70143428  | 70152976  | 674  | 120  | 4.45648     |
| KCTD8    | NM_198353    | chr4  | - | 44173918  | 44452825  | 2094 | 1907 | 4.45383     |
| ENAM     | NM_031889    | chr4  | + | 71492459  | 71514537  | 872  | 0    | 4.452706667 |
| PNLIPRP3 | NM_001011709 | chr10 | + | 118185422 | 118239469 | 774  | 628  | 4.452286667 |
| TMC1     | NM_138691    | chr9  | + | 75134715  | 75453268  | 7739 | 7670 | 4.4502      |
| DKK4     | NM_014420    | chr8  | - | 42229584  | 42236675  | 316  | 0    | 4.435093333 |
| SYCP2    | NM_014258    | chr20 | - | 58436616  | 58509210  | 919  | 848  | 4.42777     |
| DEFB110  | NM_001037728 | chr6  | - | 49974849  | 49991695  | 236  | 0    | 4.42562     |
| USH2A    | NM_206933    | chr1  | - | 215794234 | 216598739 | 7090 | 3961 | 4.424496667 |
| FAM19A2  | NM_178539    | chr12 | - | 62100039  | 62588552  | 2145 | 1946 | 4.41884     |
| KLRC3    | NM_007333    | chr12 | - | 10566181  | 10575195  | 378  | 192  | 4.40324     |
| FBXO40   | NM_016298    | chr3  | + | 121310168 | 121351140 | 111  | 51   | 4.400556667 |
| C13orf39 | NM_001010977 | chr13 | - | 103336095 | 103348855 | 54   | 0    | 4.39267     |
| SLC35F4  | NM_001080455 | chr14 | - | 58028638  | 58065616  | 243  | 0    | 4.383096667 |
| DCX      | NM_178153    | chrX  | - | 110535006 | 110657461 | 1659 | 803  | 4.37208     |
| BMP3     | NM_001201    | chr4  | + | 81950117  | 81980686  | 1503 | 1374 | 4.36486     |
| MUSK     | NM_005592    | chr9  | + | 113429049 | 113565279 | 1974 | 1958 | 4.36397     |
| SPINK7   | NM_032566    | chr5  | + | 147689988 | 147697482 | 181  | 0    | 4.363883333 |
| CDH12    | NM_004061    | chr5  | - | 21748971  | 22855732  | 3877 | 2931 | 4.360436667 |
| ZCCHC5   | NM_152694    | chrX  | - | 77909564  | 77916826  | 828  | 716  | 4.35805     |

|          |              |       |   |           |           |       |       |             |
|----------|--------------|-------|---|-----------|-----------|-------|-------|-------------|
| VSIG1    | NM_182607    | chrX  | + | 107286198 | 107324415 | 876   | 785   | 4.351753333 |
| SLC9A4   | NM_001011552 | chr2  | + | 103087760 | 103152432 | 2245  | 1814  | 4.3495      |
| CA10     | NM_020178    | chr17 | - | 49705672  | 50238133  | 4371  | 2187  | 4.345063333 |
| RGS4     | NM_005613    | chr1  | + | 163036762 | 163048593 | 1154  | 928   | 4.344676667 |
| B3GALT1  | NM_020981    | chr2  | + | 168673180 | 168729367 | 883   | 868   | 4.33914     |
| SCN2A    | NM_021007    | chr2  | + | 166148339 | 166250821 | 732   | 692   | 4.337046667 |
| MS4A2    | NM_000139    | chr11 | + | 59854135  | 59867941  | 371   | 0     | 4.295183333 |
| WDR52    | NM_018338    | chr3  | - | 113079710 | 113162362 | 1127  | 939   | 4.29184     |
| LIPF     | NM_004190    | chr10 | + | 90422092  | 90440573  | 250   | 0     | 4.290986667 |
| UPP2     | NM_173355    | chr2  | + | 158956380 | 158994667 | 1483  | 0     | 4.277013333 |
| KRTAP2-4 | NM_033184    | chr17 | - | 39219366  | 39224132  | 481   | 285   | 4.274023333 |
| P2RY13   | NM_176894    | chr3  | - | 151042094 | 151049338 | 280   | 120   | 4.272776667 |
| LRRC67   | NM_001013626 | chr8  | - | 67898365  | 67942787  | 1167  | 805   | 4.267313333 |
| RALYL    | NM_173848    | chr8  | + | 85093584  | 85836079  | 2399  | 1574  | 4.26634     |
| CALCR    | NM_001742    | chr7  | - | 93051797  | 93206043  | 2108  | 332   | 4.266076667 |
| OLR1     | NM_002543    | chr12 | - | 10308897  | 10326791  | 251   | 132   | 4.25703     |
| SNTN     | NM_001080537 | chr3  | + | 63636342  | 63652892  | 214   | 125   | 4.25419     |
| NKAIN2   | NM_153355    | chr6  | + | 124123067 | 125148787 | 7478  | 3885  | 4.24992     |
| KLHL1    | NM_020866    | chr13 | - | 70272723  | 70684626  | 2649  | 378   | 4.24349     |
| STK32A   | NM_145001    | chr5  | + | 146612577 | 146730393 | 1731  | 932   | 4.240746667 |
| CNKS2    | NM_014927    | chrX  | + | 21390534  | 21674814  | 3509  | 3271  | 4.238903333 |
| PI3      | NM_002638    | chr20 | + | 43801538  | 43807186  | 633   | 0     | 4.22789     |
| SRD5A2   | NM_000348    | chr2  | - | 31747654  | 31808041  | 2179  | 647   | 4.226886667 |
| CTNNA2   | NM_004389    | chr2  | + | 79738058  | 80877989  | 13677 | 12433 | 4.223716667 |

|           |              |       |   |           |           |      |      |             |
|-----------|--------------|-------|---|-----------|-----------|------|------|-------------|
| SPACA1    | NM_030960    | chr6  | + | 88755505  | 88778551  | 331  | 0    | 4.181406667 |
| SERPINB7  | NM_003784    | chr18 | + | 61440610  | 61474605  | 502  | 466  | 4.18119     |
| TRPC4     | NM_016179    | chr13 | - | 38208771  | 38445940  | 3706 | 3570 | 4.172936667 |
| CPA3      | NM_001870    | chr3  | + | 148581041 | 148616873 | 549  | 441  | 4.17208     |
| ADAMTS19  | NM_133638    | chr5  | + | 128794101 | 129076377 | 2516 | 2490 | 4.163113333 |
| FSHR      | NM_181446    | chr2  | - | 49187294  | 49383667  | 792  | 443  | 4.158563333 |
| FMR1NB    | NM_152578    | chrX  | + | 147060847 | 147110188 | 434  | 88   | 4.14892     |
| TRPC7     | NM_020389    | chr5  | - | 135546997 | 135703165 | 4585 | 4140 | 4.138326667 |
| SPATA16   | NM_031955    | chr3  | - | 172605145 | 172861059 | 2190 | 1859 | 4.1328      |
| BRS3      | NM_001727    | chrX  | + | 135568123 | 135576599 | 394  | 256  | 4.126413333 |
| C12orf50  | NM_152589    | chr12 | - | 88371814  | 88425177  | 256  | 235  | 4.123656667 |
| ART4      | NM_021071    | chr12 | - | 14980243  | 14998414  | 1655 | 1609 | 4.123323333 |
| PF4V1     | NM_002620    | chr4  | + | 74717011  | 74722199  | 559  | 404  | 4.122693333 |
| AMTN      | NM_212557    | chr4  | + | 71382296  | 71400460  | 353  | 0    | 4.122496667 |
| TMPRSS11F | NM_207407    | chr4  | - | 68916914  | 68997588  | 827  | 536  | 4.110846667 |
| UNC5D     | NM_080872    | chr8  | + | 35090973  | 35654182  | 9383 | 2413 | 4.10822     |
| TACR3     | NM_001059    | chr4  | - | 104508623 | 104642974 | 1266 | 1170 | 4.095683333 |
| ROBO2     | NM_002942    | chr3  | + | 77087292  | 77701115  | 4282 | 3187 | 4.07763     |
| GRM1      | NM_001114329 | chr6  | + | 146346780 | 146760732 | 3331 | 2738 | 4.073343333 |
| ADAM18    | NM_014237    | chr8  | + | 39440085  | 39589584  | 968  | 289  | 4.073276667 |
| ANGPTL1   | NM_004673    | chr1  | - | 178816668 | 178842216 | 162  | 87   | 4.072236667 |
| MRGPRX2   | NM_054030    | chr11 | - | 19074001  | 19084229  | 597  | 0    | 4.06963     |
| LRRC3B    | NM_052953    | chr3  | + | 26662298  | 26754266  | 1634 | 1026 | 4.06671     |
| PLCZ1     | NM_033123    | chr12 | - | 18834114  | 18892919  | 2058 | 1845 | 4.065086667 |

|          |           |       |   |           |           |      |      |             |
|----------|-----------|-------|---|-----------|-----------|------|------|-------------|
| RERG     | NM_032918 | chr12 | - | 15258714  | 15376412  | 2148 | 1573 | 4.062493333 |
| TEK      | NM_000459 | chr9  | + | 27107145  | 27232173  | 3151 | 2709 | 4.058883333 |
| CHODL    | NM_024944 | chr21 | + | 19615148  | 19641688  | 1211 | 486  | 4.053703333 |
| WNT16    | NM_057168 | chr7  | + | 120967088 | 120983159 | 1452 | 900  | 4.04489     |
| SLC4A10  | NM_022058 | chr2  | + | 162478843 | 162843787 | 1840 | 807  | 4.041323333 |
| GALNT3   | NM_004482 | chr2  | - | 166602311 | 166652804 | 2271 | 2013 | 4.032506667 |
| IRS4     | NM_003604 | chrX  | - | 107973725 | 107981608 | 3307 | 3298 | 4.028343333 |
| GREM2    | NM_022469 | chr1  | - | 240650871 | 240777463 | 4524 | 3539 | 4.019723333 |
| KCNC2    | NM_153748 | chr12 | - | 75431894  | 75605512  | 2074 | 836  | 4.016113333 |
| FSTL5    | NM_020116 | chr4  | - | 162303047 | 163087187 | 2307 | 1414 | 4.006843333 |
| C1orf110 | NM_178550 | chr1  | - | 162822085 | 162840606 | 792  | 656  | 3.984393333 |
| HSD17B13 | NM_178135 | chr4  | - | 88222939  | 88246057  | 406  | 0    | 3.97718     |
| PTPRZ1   | NM_002851 | chr7  | + | 121511157 | 121704091 | 1974 | 1960 | 3.973356667 |
| TMPRSS15 | NM_002772 | chr21 | - | 19639431  | 19777971  | 505  | 394  | 3.971153333 |
| WIF1     | NM_007191 | chr12 | - | 65442402  | 65517347  | 452  | 324  | 3.949286667 |
| ATP6V0D2 | NM_152565 | chr8  | + | 87109137  | 87168455  | 1297 | 1161 | 3.947896667 |
| SPOCK3   | NM_016950 | chr4  | - | 167652534 | 168157742 | 2207 | 1605 | 3.942303333 |
| CARTPT   | NM_004291 | chr5  | + | 71012988  | 71018876  | 755  | 306  | 3.93852     |
| CXorf22  | NM_152632 | chrX  | + | 35935849  | 36010270  | 918  | 0    | 3.925833333 |
| MCHR2    | NM_032503 | chr6  | - | 100365784 | 100444115 | 601  | 359  | 3.910576667 |
| VIP      | NM_194435 | chr6  | + | 153069931 | 153082903 | 241  | 160  | 3.908176667 |
| TMEM207  | NM_207316 | chr3  | - | 190144442 | 190169666 | 337  | 0    | 3.908143333 |
| OPN5     | NM_181744 | chr6  | + | 47747773  | 47796117  | 1383 | 894  | 3.89396     |
| GPC5     | NM_004466 | chr13 | + | 92048933  | 93521488  | 6313 | 4806 | 3.88813     |

|           |              |       |   |           |           |      |      |             |
|-----------|--------------|-------|---|-----------|-----------|------|------|-------------|
| SLC5A7    | NM_021815    | chr2  | + | 108600993 | 108632444 | 552  | 0    | 3.887013333 |
| SCN3A     | NM_006922    | chr2  | - | 165942028 | 166062578 | 716  | 0    | 3.8859      |
| PCDH9     | NM_203487    | chr13 | - | 66874964  | 67806469  | 8570 | 6449 | 3.884723333 |
| HIST1H2BJ | NM_021058    | chr6  | - | 27098093  | 27102576  | 1267 | 1185 | 3.884056667 |
| FGF23     | NM_020638    | chr12 | - | 4475391   | 4490895   | 368  | 293  | 3.881563333 |
| TBX22     | NM_016954    | chrX  | + | 79275740  | 79289269  | 483  | 112  | 3.878673333 |
| SLC17A6   | NM_020346    | chr11 | + | 22357665  | 22403047  | 354  | 161  | 3.870706667 |
| AVPR1A    | NM_000706    | chr12 | - | 63538214  | 63548591  | 1791 | 457  | 3.87042     |
| GABRA2    | NM_001114175 | chr4  | - | 46249579  | 46393397  | 1537 | 494  | 3.8703      |
| NRXN1     | NM_138735    | chr2  | - | 50143641  | 50576895  | 1089 | 1022 | 3.869076667 |
| RIT2      | NM_002930    | chr18 | - | 40321190  | 40697658  | 1470 | 554  | 3.8598      |
| ART3      | NM_001179    | chr4  | + | 76993861  | 77035956  | 927  | 879  | 3.85165     |
| DACH1     | NM_080760    | chr13 | - | 72010096  | 72443331  | 3996 | 3397 | 3.827156667 |
| CXCL13    | NM_006419    | chr4  | + | 78430905  | 78534989  | 2669 | 2597 | 3.819393333 |
| LPPR4     | NM_014839    | chr1  | + | 99727846  | 99777139  | 944  | 692  | 3.805623333 |
| SEMA3E    | NM_012431    | chr7  | - | 82991220  | 83280480  | 2320 | 1991 | 3.793366667 |
| C18orf34  | NM_198995    | chr18 | - | 30515364  | 31022686  | 4235 | 2273 | 3.781016667 |
| RPE65     | NM_000329    | chr1  | - | 68892505  | 68917643  | 789  | 332  | 3.769826667 |
| PHYHIPL   | NM_032439    | chr10 | + | 60934346  | 61009535  | 2045 | 2027 | 3.752473333 |
| UNC13C    | NM_001080534 | chr15 | + | 54303099  | 54922807  | 2028 | 676  | 3.746846667 |
| SPINK6    | NM_205841    | chr5  | + | 147580355 | 147596701 | 76   | 0    | 3.74003     |
| FAM55B    | NM_182495    | chr11 | + | 114547198 | 114579653 | 290  | 0    | 3.727333333 |
| OXGR1     | NM_080818    | chr13 | - | 97635971  | 97648605  | 1136 | 441  | 3.722506667 |
| GPR174    | NM_032553    | chrX  | + | 78424467  | 78429727  | 412  | 0    | 3.721056667 |

|           |              |       |   |           |           |      |      |             |
|-----------|--------------|-------|---|-----------|-----------|------|------|-------------|
| OLFM3     | NM_058170    | chr1  | - | 102266125 | 102464791 | 323  | 182  | 3.710246667 |
| DEFB135   | NM_001033017 | chr8  | + | 11837828  | 11844100  | 755  | 679  | 3.707733333 |
| STATH     | NM_003154    | chr4  | + | 70859646  | 70870174  | 234  | 0    | 3.705416667 |
| BEX4      | NM_001127688 | chrX  | + | 102468018 | 102474096 | 1316 | 1269 | 3.701263333 |
| FAM5C     | NM_199051    | chr1  | - | 190064795 | 190448760 | 2263 | 257  | 3.681236667 |
| C9orf57   | NM_001128618 | chr9  | - | 74664295  | 74677522  | 171  | 0    | 3.663606667 |
| GRIA2     | NM_001083620 | chr4  | + | 158139818 | 158289227 | 3248 | 2492 | 3.65406     |
| F9        | NM_000133    | chrX  | + | 138610893 | 138647618 | 973  | 498  | 3.640973333 |
| C6orf118  | NM_144980    | chr6  | - | 165691151 | 165725112 | 1050 | 954  | 3.631183333 |
| YIPF7     | NM_182592    | chr4  | - | 44622352  | 44655659  | 317  | 310  | 3.623373333 |
| SLITRK1   | NM_052910    | chr13 | - | 84449341  | 84458529  | 1030 | 0    | 3.610986667 |
| IL2       | NM_000586    | chr4  | - | 123370624 | 123379651 | 338  | 0    | 3.608116667 |
| GADL1     | NM_207359    | chr3  | - | 30765690  | 30938154  | 2604 | 1805 | 3.594323333 |
| OR9Q1     | NM_001005212 | chr11 | + | 57789351  | 57951039  | 4892 | 3572 | 3.57575     |
| GPM6A     | NM_201592    | chr4  | - | 176552086 | 176925649 | 2116 | 812  | 3.56894     |
| ASZ1      | NM_130768    | chr7  | - | 117001274 | 117069578 | 454  | 306  | 3.568516667 |
| CADM2     | NM_153184    | chr3  | + | 85773630  | 86125580  | 748  | 0    | 3.563513333 |
| GNGT1     | NM_021955    | chr7  | + | 93533818  | 93542486  | 357  | 255  | 3.556886667 |
| SPHKAP    | NM_030623    | chr2  | - | 228842668 | 229048362 | 1836 | 1035 | 3.532726667 |
| ANKRD30B  | NM_001145029 | chr18 | + | 14746237  | 14854738  | 377  | 139  | 3.526506667 |
| TMPRSS11A | NM_182606    | chr4  | - | 68774017  | 68831233  | 757  | 173  | 3.521186667 |
| ABCD2     | NM_005164    | chr12 | - | 39943020  | 40015844  | 1292 | 697  | 3.521083333 |
| XCL1      | NM_002995    | chr1  | + | 168543854 | 168553316 | 1014 | 195  | 3.514163333 |
| SLITRK2   | NM_032539    | chrX  | + | 144897345 | 144909361 | 2084 | 1900 | 3.501973333 |

|           |              |       |   |           |           |       |       |             |
|-----------|--------------|-------|---|-----------|-----------|-------|-------|-------------|
| NPY2R     | NM_000910    | chr4  | + | 156127779 | 156140229 | 1171  | 0     | 3.501163333 |
| PCDH15    | NM_033056    | chr10 | - | 55578858  | 56563052  | 1479  | 1243  | 3.499886667 |
| FGF20     | NM_019851    | chr8  | - | 16848332  | 16861675  | 1136  | 1111  | 3.466806667 |
| MGAT4C    | NM_013244    | chr12 | - | 86371035  | 87234682  | 2344  | 2314  | 3.4463      |
| FAM190A   | NM_207491    | chr4  | + | 91154180  | 91705155  | 3534  | 1266  | 3.442766667 |
| GNAT3     | NM_001102386 | chr7  | - | 80085985  | 80143243  | 673   | 315   | 3.433026667 |
| NDST4     | NM_022569    | chr4  | - | 115746925 | 116037033 | 621   | 0     | 3.43039     |
| THEMIS    | NM_001164687 | chr6  | - | 128027337 | 128241777 | 656   | 602   | 3.404476667 |
| ZSWIM2    | NM_182521    | chr2  | - | 187690205 | 187715898 | 821   | 803   | 3.396243333 |
| DCDC2B    | NM_001099434 | chr1  | + | 32672693  | 32683798  | 792   | 737   |             |
| FAM72B    | NM_001100910 | chr1  | + | 120837003 | 120857682 | 1897  | 464   |             |
| TCHH      | NM_007113    | chr1  | - | 152076791 | 152088557 | 1764  | 1426  |             |
| RGPD6     | NM_001123363 | chr2  | - | 111269377 | 111338310 | 668   | 376   |             |
| RGPD8     | NM_001164463 | chr2  | - | 113123944 | 113193223 | 845   | 769   |             |
| LOC150786 | NM_001077637 | chr2  | - | 132116063 | 132123732 | 683   | 578   |             |
| UGT1A8    | NM_019076    | chr2  | + | 234524289 | 234683946 | 5734  | 5388  |             |
| UGT1A10   | NM_019075    | chr2  | + | 234543121 | 234683952 | 5734  | 5388  |             |
| UGT1A9    | NM_021027    | chr2  | + | 234578542 | 234683952 | 5585  | 4960  |             |
| UGT1A7    | NM_019077    | chr2  | + | 234588582 | 234683946 | 5585  | 4960  |             |
| UGT1A6    | NM_205862    | chr2  | + | 234598319 | 234683946 | 5585  | 4827  |             |
| ULK4      | NM_017886    | chr3  | - | 41286088  | 42005661  | 14581 | 13789 |             |
| FLJ25363  | NM_001145553 | chr3  | + | 109126835 | 109216015 | 418   | 143   |             |
| GEMC1     | NM_001146686 | chr3  | - | 190568524 | 190582466 | 928   | 616   |             |
| KIAA1109  | NM_015312    | chr4  | + | 123089756 | 123285915 | 746   | 706   |             |

|           |              |      |   |           |           |      |      |
|-----------|--------------|------|---|-----------|-----------|------|------|
| PABPC4L   | NM_001114734 | chr4 | - | 135115487 | 135124904 | 1586 | 1140 |
| FAM160A1  | NM_001109977 | chr4 | + | 152328396 | 152586785 | 7175 | 6903 |
| RAPGEF2   | NM_014247    | chr4 | + | 160186996 | 160283302 | 1881 | 1438 |
| DDX60L    | NM_001012967 | chr4 | - | 169275884 | 169403639 | 4074 | 3897 |
| DUX4L5    | NM_001127389 | chr4 | + | 190990091 | 190995704 | 199  | 0    |
| DUX4L3    | NM_001164467 | chr4 | + | 190990091 | 190995704 | 199  | 0    |
| FAM159B   | NM_001164442 | chr5 | + | 63984133  | 64016018  | 1581 | 1208 |
| GTF2H2C   | NM_001098728 | chr5 | + | 68854049  | 68890730  | 244  | 0    |
| SERF1B    | NM_022978    | chr5 | + | 69319076  | 69340935  | 810  | 808  |
| FAM169A   | NM_015566    | chr5 | - | 74071397  | 74164616  | 2436 | 2369 |
| C5orf52   | NM_001145132 | chr5 | + | 157096559 | 157109163 | 1332 | 1292 |
| ATP10B    | NM_025153    | chr5 | - | 159988125 | 160281220 | 4141 | 2908 |
| FAM153C   | NM_001079527 | chr5 | + | 177433687 | 177476657 | 649  | 0    |
| ZNF879    | NM_001136116 | chr5 | + | 178448774 | 178463389 | 859  | 806  |
| ZNF389    | NM_001145129 | chr6 | + | 28127549  | 28139377  | 951  | 622  |
| C6orf103  | NM_024694    | chr6 | + | 146918134 | 147138598 | 1778 | 1740 |
| LOC389493 | NM_001145712 | chr7 | - | 56180372  | 56186091  | 423  | 0    |
| ZNF736    | NM_001170905 | chr7 | + | 63771184  | 63812018  | 1138 | 800  |
| PCLO      | NM_033026    | chr7 | - | 82381319  | 82794198  | 2710 | 2094 |
| TMEM229A  | NM_001136002 | chr7 | - | 123668968 | 123675524 | 1319 | 1302 |
| FAM86B2   | NM_001137610 | chr8 | - | 12281122  | 12295853  | 1432 | 1381 |
| TOMM5     | NM_001134485 | chr9 | - | 37586410  | 37594637  | 766  | 731  |
| FOXD4L6   | NM_001085476 | chr9 | - | 69197478  | 69204205  | 131  | 0    |
| ANKRD20A4 | NM_001098805 | chr9 | + | 69379979  | 69427110  | 408  | 67   |



|           |              |       |   |           |           |       |       |
|-----------|--------------|-------|---|-----------|-----------|-------|-------|
| ANXA8L1   | NM_001098845 | chr10 | - | 47155987  | 47176041  | 467   | 0     |
| C10orf131 | NM_001130446 | chr10 | + | 97665720  | 97700416  | 1759  | 1533  |
| SLC15A5   | NM_001170798 | chr12 | - | 16339417  | 16432620  | 408   | 64    |
| ZAR1L     | NM_001136571 | chr13 | - | 32875906  | 32888092  | 304   | 295   |
| C13orf38  | NM_001144986 | chr13 | - | 36803213  | 36873993  | 2058  | 1159  |
| FAM155A   | NM_001080396 | chr13 | - | 107818877 | 108521461 | 13071 | 9124  |
| C14orf38  | NM_001164399 | chr14 | - | 59969783  | 60045550  | 1472  | 1225  |
| C14orf184 | NM_001080113 | chr14 | - | 92036786  | 92043384  | 1244  | 1129  |
| FAM189A1  | NM_015307    | chr15 | - | 29410453  | 29864928  | 16805 | 15522 |
| CTXN2     | NM_001145668 | chr15 | + | 48481865  | 48497952  | 551   | 352   |
| SHISA9    | NM_001145205 | chr16 | + | 12993475  | 13007508  | 1565  | 1557  |
| FTO       | NM_001080432 | chr16 | + | 53735873  | 54150380  | 10400 | 9765  |
| CCDC144A  | NM_014695    | chr17 | + | 16591637  | 16680312  | 724   | 236   |
| TBC1D3H   | NM_001123392 | chr17 | - | 34743934  | 34759051  | 146   | 0     |
| LOC730755 | NM_001165252 | chr17 | - | 39213491  | 39218345  | 1142  | 1040  |
| KRTAP4-9  | NM_001146041 | chr17 | + | 39259639  | 39264741  | 493   | 431   |
| LOC642597 | NM_001145194 | chr18 | - | 5141670   | 5199256   | 577   | 569   |
| ZNF506    | NM_001145404 | chr19 | - | 19901518  | 19934561  | 795   | 785   |
| ZNF90     | NM_007138    | chr19 | + | 20186801  | 20233978  | 1390  | 1323  |
| ZNF726    | NM_001190829 | chr19 | + | 24095682  | 24108518  | 808   | 784   |
| ZNF814    | NM_001144989 | chr19 | - | 58378745  | 58402443  | 1048  | 684   |
| SPINT3    | NM_006652    | chr20 | - | 44139099  | 44146265  | 190   | 0     |
| RIMBP3    | NM_015672    | chr22 | - | 20453992  | 20463787  | 2107  | 0     |
| RIMBP3C   | NM_001128633 | chr22 | - | 21897956  | 21907751  | 2311  | 133   |

|              |              |      |   |           |           |      |      |  |
|--------------|--------------|------|---|-----------|-----------|------|------|--|
| CXorf49      | NM_001145140 | chrX | - | 70932222  | 70940136  | 4033 | 3811 |  |
| FAM127B      | NM_001134321 | chrX | - | 134182961 | 134188222 | 1577 | 1346 |  |
| LOC100287428 | NM_001170944 | chrX | + | 152238817 | 152245403 | 1841 | 603  |  |
| OPN1MW2      | NM_001048181 | chrX | + | 153446083 | 153463638 | 81   | 0    |  |
| F8A3         | NM_001007524 | chrX | - | 154685144 | 154690262 | 899  | 0    |  |
| H2AFB3       | NM_080720    | chrX | - | 154687078 | 154691597 | 899  | 0    |  |
