# Supplementary material
Source: PubMed Central journal article supplement (PMC4076396)
Supplement: supp_113.110403_110403SupTabS2.pdf [file supp_113.110403_110403SupTabS2.pdf]

**Supplemental Table S2.** Statistically over-represented ( $p < 0.05$ ) processes from DAVID analysis when comparing a list of genes with Epididymis-selective DHS in their promoter to all human genes.

| Category        | Term                                       | Count | %          | PValue    | List Total | Pop Hits | Pop Total | Fold Enrichment | Bonferroni | Benjamini | FDR       |
|-----------------|--------------------------------------------|-------|------------|-----------|------------|----------|-----------|-----------------|------------|-----------|-----------|
| SP_PIR_KEYWORDS | glycoprotein                               | 169   | 31.8267420 | 0.0000016 | 529        | 4209     | 18289     | 1.3881681       | 0.0006730  | 0.0006730 | 0.0022515 |
| SP_PIR_KEYWORDS | cell junction                              | 30    | 5.6497175  | 0.0000053 | 529        | 398      | 18289     | 2.6059884       | 0.0022086  | 0.0011049 | 0.0073946 |
| KEGG_PATHWAY    | hsa00830:Retinol metabolism                | 10    | 1.8832392  | 0.0000131 | 140        | 54       | 5042      | 6.6693122       | 0.0016551  | 0.0016551 | 0.0152233 |
| GOTERM_CC_FAT   | GO:0030054~cell junction                   | 34    | 6.4030132  | 0.0000223 | 364        | 515      | 12337     | 2.2375867       | 0.0071754  | 0.0071754 | 0.0301237 |
| SP_PIR_KEYWORDS | signal                                     | 129   | 24.2937853 | 0.0000233 | 529        | 3158     | 18289     | 1.4122509       | 0.0097264  | 0.0032527 | 0.0326842 |
| GOTERM_CC_FAT   | GO:0005886~plasma membrane                 | 145   | 27.3069680 | 0.0000240 | 364        | 3663     | 12337     | 1.3416501       | 0.0077188  | 0.0038669 | 0.0324134 |
| GOTERM_CC_FAT   | GO:0044459~plasma membrane part            | 95    | 17.8907721 | 0.0000330 | 364        | 2163     | 12337     | 1.4885906       | 0.0106181  | 0.0035520 | 0.0446510 |
| GOTERM_CC_FAT   | GO:0005912~adherens junction               | 15    | 2.8248588  | 0.0001921 | 364        | 155      | 12337     | 3.2799539       | 0.0601784  | 0.0153966 | 0.2593278 |
| SP_PIR_KEYWORDS | transmembrane                              | 175   | 32.9566855 | 0.0002431 | 529        | 4781     | 18289     | 1.2654751       | 0.0970911  | 0.0252102 | 0.3410072 |
| SP_PIR_KEYWORDS | membrane                                   | 214   | 40.3013183 | 0.0003110 | 529        | 6079     | 18289     | 1.2170710       | 0.1224803  | 0.0257927 | 0.4360303 |
| GOTERM_CC_FAT   | GO:0016323~basolateral plasma membrane     | 17    | 3.2015066  | 0.0003310 | 364        | 203      | 12337     | 2.8383181       | 0.1014140  | 0.0211595 | 0.4463797 |
| GOTERM_CC_FAT   | GO:0070161~anchoring junction              | 15    | 2.8248588  | 0.0005594 | 364        | 172      | 12337     | 2.9557724       | 0.1653430  | 0.0296732 | 0.7532936 |
| GOTERM_CC_FAT   | GO:0031224~intrinsic to membrane           | 186   | 35.0282486 | 0.0006028 | 364        | 5244     | 12337     | 1.2021494       | 0.1769659  | 0.0274390 | 0.8115039 |
| GOTERM_MF_FAT   | GO:0005275~amine transmembrane transporter | 9     | 1.6949153  | 0.0007208 | 342        | 72       | 12549     | 4.5866228       | 0.3403720  | 0.3403720 | 1.0537326 |

|                 |                                                               |     |            |           |     |      |       |            |           |           |           |
|-----------------|---------------------------------------------------------------|-----|------------|-----------|-----|------|-------|------------|-----------|-----------|-----------|
|                 | activity                                                      |     |            |           |     |      |       |            |           |           |           |
| SP_PIR_KEYWORDS | cell membrane                                                 | 87  | 16.3841808 | 0.0007891 | 529 | 2131 | 18289 | 1.4114649  | 0.2821771 | 0.0537565 | 1.1026981 |
| KEGG_PATHWAY    | hsa00053:Ascorbate and aldarate metabolism                    | 5   | 0.9416196  | 0.0009955 | 140 | 17   | 5042  | 10.5924370 | 0.1179447 | 0.0608220 | 1.1468474 |
| KEGG_PATHWAY    | hsa00983:Drug metabolism                                      | 7   | 1.3182674  | 0.0010368 | 140 | 43   | 5042  | 5.8627907  | 0.1225204 | 0.0426318 | 1.1940910 |
| GOTERM_CC_FAT   | GO:0016021~integral to membrane                               | 179 | 33.7099812 | 0.0010482 | 364 | 5061 | 12337 | 1.1987397  | 0.2873475 | 0.0414611 | 1.4072920 |
| GOTERM_MF_FAT   | GO:0015293~symporter activity                                 | 12  | 2.2598870  | 0.0011995 | 342 | 136  | 12549 | 3.2376161  | 0.4997023 | 0.2926827 | 1.7477601 |
| KEGG_PATHWAY    | hsa04080:Neuroactive ligand-receptor interaction              | 17  | 3.2015066  | 0.0015835 | 140 | 255  | 5042  | 2.4009524  | 0.1810087 | 0.0486949 | 1.8185360 |
| INTERPRO        | IPR000233: Cadherin cytoplasmic region                        | 5   | 0.9416196  | 0.0016620 | 450 | 19   | 16090 | 9.4093567  | 0.7489991 | 0.7489991 | 2.5334565 |
| GOTERM_CC_FAT   | GO:0045211~postsynaptic membrane                              | 12  | 2.2598870  | 0.0021211 | 364 | 135  | 12337 | 3.0126984  | 0.4963317 | 0.0733730 | 2.8285869 |
| PIR_SUPERFAMILY | PIRSF002504: cadherin                                         | 5   | 0.9416196  | 0.0022431 | 208 | 20   | 7196  | 8.6490385  | 0.4087322 | 0.4087322 | 2.8456894 |
| GOTERM_CC_FAT   | GO:0005576~extracellular region                               | 77  | 14.5009416 | 0.0028580 | 364 | 1906 | 12337 | 1.3692288  | 0.6032561 | 0.0883020 | 3.7938735 |
| COG_ONTOLOGY    | Secondary metabolites biosynthesis, transport, and catabolism | 7   | 1.3182674  | 0.0032351 | 46  | 65   | 1944  | 4.5511706  | 0.0443513 | 0.0443513 | 2.1770906 |
| GOTERM_BP_FAT   | GO:0016337~cell-cell adhesion                                 | 17  | 3.2015066  | 0.0036494 | 360 | 274  | 13114 | 2.2601176  | 0.9992525 | 0.9992525 | 6.0817034 |
| GOTERM_BP_FAT   | GO:0050801~ion homeostasis                                    | 22  | 4.1431262  | 0.0039770 | 360 | 406  | 13114 | 1.9739190  | 0.9996088 | 0.9802211 | 6.6102273 |
| GOTERM_MF_FAT   | GO:0015294~solute:cation symporter activity                   | 9   | 1.6949153  | 0.0040086 | 342 | 94   | 12549 | 3.5131579  | 0.9014931 | 0.5381628 | 5.7298917 |

|                 |                                                      |    |           |           |     |     |       |            |           |           |            |
|-----------------|------------------------------------------------------|----|-----------|-----------|-----|-----|-------|------------|-----------|-----------|------------|
| SP_PIR_KEYWORDS | transmembrane protein                                | 31 | 5.8380414 | 0.0045113 | 529 | 623 | 18289 | 1.7203148  | 0.8502890 | 0.2376067 | 6.1539420  |
| SP_PIR_KEYWORDS | Symport                                              | 10 | 1.8832392 | 0.0045838 | 529 | 110 | 18289 | 3.1429799  | 0.8547963 | 0.2143173 | 6.2498413  |
| GOTERM_BP_FAT   | GO:0008285~negative regulation of cell proliferation | 20 | 3.7664783 | 0.0049078 | 360 | 360 | 13114 | 2.0237654  | 0.9999379 | 0.9604075 | 8.0968703  |
| GOTERM_BP_FAT   | GO:0007155~cell adhesion                             | 32 | 6.0263653 | 0.0049989 | 360 | 694 | 13114 | 1.6796670  | 0.9999482 | 0.9151511 | 8.2410943  |
| INTERPRO        | IPR002213:UDP-glucuronosyl/UDP-glucosyltransferase   | 4  | 0.7532957 | 0.0050111 | 450 | 13  | 16090 | 11.0017094 | 0.9846196 | 0.8759822 | 7.4571536  |
| GOTERM_BP_FAT   | GO:0022610~biological adhesion                       | 32 | 6.0263653 | 0.0051046 | 360 | 695 | 13114 | 1.6772502  | 0.9999580 | 0.8667271 | 8.4082916  |
| INTERPRO        | IPR013106:Immunoglobulin V-set                       | 13 | 2.4482109 | 0.0051323 | 450 | 182 | 16090 | 2.5539683  | 0.9861006 | 0.7595644 | 7.6309318  |
| GOTERM_MF_FAT   | GO:0008289~lipid binding                             | 23 | 4.3314501 | 0.0051927 | 342 | 446 | 12549 | 1.8922390  | 0.9504110 | 0.5281041 | 7.3629018  |
| PIR_SUPERFAMILY | PIRSF005678:glucuronosyltransferase                  | 4  | 0.7532957 | 0.0054209 | 208 | 13  | 7196  | 10.6449704 | 0.7197104 | 0.4705762 | 6.7492929  |
| SP_PIR_KEYWORDS | neurotransmitter receptor                            | 7  | 1.3182674 | 0.0058726 | 529 | 57  | 18289 | 4.2457799  | 0.9157324 | 0.2403230 | 7.9405653  |
| GOTERM_BP_FAT   | GO:0030817~regulation of cAMP biosynthetic process   | 9  | 1.6949153 | 0.0064681 | 360 | 101 | 13114 | 3.2460396  | 0.9999972 | 0.8811060 | 10.5388559 |
| GOTERM_BP_FAT   | GO:0048878~chemical homeostasis                      | 25 | 4.7080979 | 0.0065392 | 360 | 507 | 13114 | 1.7962415  | 0.9999975 | 0.8420403 | 10.6485553 |
| GOTERM_BP_FAT   | GO:0046942~carboxylic acid transport                 | 11 | 2.0715631 | 0.0065541 | 360 | 145 | 13114 | 2.7634866  | 0.9999976 | 0.8017922 | 10.6716094 |
| GOTERM_MF_FAT   | GO:0042165~neurotransmitter binding                  | 9  | 1.6949153 | 0.0065569 | 342 | 102 | 12549 | 3.2376161  | 0.9775350 | 0.5319404 | 9.2116977  |
| GOTERM_BP_FAT   | GO:0007389~pattern specification process             | 16 | 3.0131827 | 0.0068139 | 360 | 267 | 13114 | 2.1829380  | 0.9999986 | 0.7759378 | 11.0716602 |

BOR-Papers in Press. Published as DOI: 10.1095/biolreprod.113.110403

|                 |                                                  |    |            |           |     |      |       |           |           |           |            |
|-----------------|--------------------------------------------------|----|------------|-----------|-----|------|-------|-----------|-----------|-----------|------------|
| GOTERM_BP_FAT   | GO:0015849~organic acid transport                | 11 | 2.0715631  | 0.0068703 | 360 | 146  | 13114 | 2.7445586 | 0.9999987 | 0.7426786 | 11.1582811 |
| GOTERM_BP_FAT   | GO:0030814~regulation of cAMP metabolic process  | 9  | 1.6949153  | 0.0072618 | 360 | 103  | 13114 | 3.1830097 | 0.9999994 | 0.7287178 | 11.7573462 |
| GOTERM_MF_FAT   | GO:0015276~ligand-gated ion channel activity     | 10 | 1.8832392  | 0.0073981 | 342 | 126  | 12549 | 2.9121415 | 0.9862208 | 0.5103668 | 10.3345153 |
| GOTERM_MF_FAT   | GO:0022834~ligand-gated channel activity         | 10 | 1.8832392  | 0.0073981 | 342 | 126  | 12549 | 2.9121415 | 0.9862208 | 0.5103668 | 10.3345153 |
| GOTERM_CC_FAT   | GO:0031226~intrinsic to plasma membrane          | 51 | 9.6045198  | 0.0079862 | 364 | 1207 | 12337 | 1.4320926 | 0.9249714 | 0.2097802 | 10.2690105 |
| SP_PIR_KEYWORDS | Secreted                                         | 65 | 12.2410546 | 0.0084541 | 529 | 1643 | 18289 | 1.3677606 | 0.9717261 | 0.2999347 | 11.2423099 |
| SMART           | SM00112:CA                                       | 9  | 1.6949153  | 0.0085155 | 243 | 106  | 8828  | 3.0845563 | 0.7909154 | 0.7909154 | 10.0242366 |
| GOTERM_BP_FAT   | GO:0060541~respiratory system development        | 9  | 1.6949153  | 0.0085871 | 360 | 106  | 13114 | 3.0929245 | 1.0000000 | 0.7570939 | 13.7574434 |
| GOTERM_CC_FAT   | GO:0014704~intercalated disc                     | 4  | 0.7532957  | 0.0088347 | 364 | 15   | 12337 | 9.0380952 | 0.9430902 | 0.2124728 | 11.3006764 |
| GOTERM_CC_FAT   | GO:0045202~synapse                               | 20 | 3.7664783  | 0.0089705 | 364 | 355  | 12337 | 1.9094567 | 0.9455545 | 0.2005960 | 11.4647957 |
| GOTERM_BP_FAT   | GO:0007156~homophilic cell adhesion              | 10 | 1.8832392  | 0.0090005 | 360 | 129  | 13114 | 2.8238587 | 1.0000000 | 0.7457400 | 14.3725355 |
| SP_PIR_KEYWORDS | synapse                                          | 14 | 2.6365348  | 0.0091689 | 529 | 213  | 18289 | 2.2723892 | 0.9791144 | 0.2965086 | 12.1368809 |
| INTERPRO        | IPR002126: Cadherin                              | 9  | 1.6949153  | 0.0096348 | 450 | 106  | 16090 | 3.0358491 | 0.9996794 | 0.8661893 | 13.8735279 |
| GOTERM_CC_FAT   | GO:0005911~cell-cell junction                    | 13 | 2.4482109  | 0.0097166 | 364 | 188  | 12337 | 2.3436550 | 0.9573104 | 0.2017006 | 12.3612303 |
| GOTERM_CC_FAT   | GO:0005925~focal adhesion                        | 9  | 1.6949153  | 0.0103438 | 364 | 102  | 12337 | 2.9905462 | 0.9652109 | 0.2006023 | 13.1083928 |
| GOTERM_BP_FAT   | GO:0030808~regulation of nucleotide biosynthetic | 9  | 1.6949153  | 0.0106259 | 360 | 110  | 13114 | 2.9804545 | 1.0000000 | 0.7774168 | 16.7511560 |

|               |                                                                 |    |           |           |     |      |       |           |           |           |            |
|---------------|-----------------------------------------------------------------|----|-----------|-----------|-----|------|-------|-----------|-----------|-----------|------------|
|               | process                                                         |    |           |           |     |      |       |           |           |           |            |
| GOTERM_BP_FAT | GO:0030802~regulation of cyclic nucleotide biosynthetic process | 9  | 1.6949153 | 0.0106259 | 360 | 110  | 13114 | 2.9804545 | 1.0000000 | 0.7774168 | 16.7511560 |
| GOTERM_BP_FAT | GO:0015718~monocarboxylic acid transport                        | 6  | 1.1299435 | 0.0115501 | 360 | 50   | 13114 | 4.3713333 | 1.0000000 | 0.7823718 | 18.0757130 |
| GOTERM_BP_FAT | GO:0055080~cation homeostasis                                   | 16 | 3.0131827 | 0.0116150 | 360 | 284  | 13114 | 2.0522692 | 1.0000000 | 0.7625352 | 18.1679649 |
| KEGG_PATHWAY  | hsa00860:Porphyrin and chlorophyll metabolism                   | 5  | 0.9416196 | 0.0121713 | 140 | 33   | 5042  | 5.4567100 | 0.7862583 | 0.2655236 | 13.2218972 |
| KEGG_PATHWAY  | hsa00040:Penicillin and glucuronate interconversions            | 4  | 0.7532957 | 0.0123514 | 140 | 18   | 5042  | 8.0031746 | 0.7911132 | 0.2297143 | 13.4049522 |
| GOTERM_BP_FAT | GO:0030799~regulation of cyclic nucleotide metabolic process    | 9  | 1.6949153 | 0.0123754 | 360 | 113  | 13114 | 2.9013274 | 1.0000000 | 0.7636168 | 19.2416772 |
| INTERPRO      | IPR016044:Filament                                              | 7  | 1.3182674 | 0.0124542 | 450 | 69   | 16090 | 3.6273752 | 0.9999700 | 0.8754298 | 17.5793053 |
| GOTERM_CC_FAT | GO:0005887~integral to plasma membrane                          | 49 | 9.2278719 | 0.0128032 | 364 | 1180 | 12337 | 1.4074153 | 0.9844255 | 0.2290506 | 15.9814103 |
| GOTERM_CC_FAT | GO:0005924~cell-substrate adherens junction                     | 9  | 1.6949153 | 0.0128672 | 364 | 106  | 12337 | 2.8776954 | 0.9847484 | 0.2181271 | 16.0550310 |
| INTERPRO      | IPR018039:Intermediate filament protein, conserved site         | 7  | 1.3182674 | 0.0133109 | 450 | 70   | 16090 | 3.5755556 | 0.9999854 | 0.8436950 | 18.6754968 |
| INTERPRO      | IPR001664:Intermediate filament protein                         | 7  | 1.3182674 | 0.0133109 | 450 | 70   | 16090 | 3.5755556 | 0.9999854 | 0.8436950 | 18.6754968 |
| GOTERM_BP_FAT | GO:0055066~di-, tri-valent inorganic cation homeostasis         | 14 | 2.6365348 | 0.0136321 | 360 | 237  | 13114 | 2.1518519 | 1.0000000 | 0.7771956 | 20.9873191 |
| GOTERM_BP_FAT | GO:0006140~regulation of nucleotide metabolic process           | 9  | 1.6949153 | 0.0143277 | 360 | 116  | 13114 | 2.8262931 | 1.0000000 | 0.7758726 | 21.9381032 |

|                 |                                                                 |     |            |           |     |      |       |            |           |           |            |
|-----------------|-----------------------------------------------------------------|-----|------------|-----------|-----|------|-------|------------|-----------|-----------|------------|
| SP_PIR_KEYWORDS | postsynaptic cell membrane                                      | 9   | 1.6949153  | 0.0143930 | 529 | 110  | 18289 | 2.8286819  | 0.9977323 | 0.3979501 | 18.4250748 |
| SP_PIR_KEYWORDS | disulfide bond                                                  | 101 | 19.0207156 | 0.0151118 | 529 | 2819 | 18289 | 1.2386842  | 0.9983308 | 0.3885686 | 19.2567715 |
| GOTERM_BP_FAT   | GO:0045761~regulation of adenylate cyclase activity             | 8   | 1.5065913  | 0.0161757 | 360 | 96   | 13114 | 3.0356481  | 1.0000000 | 0.7992154 | 24.4122099 |
| GOTERM_BP_FAT   | GO:0007186~G-protein coupled receptor protein signaling pathway | 41  | 7.7212806  | 0.0167477 | 360 | 1036 | 13114 | 1.4416399  | 1.0000000 | 0.7947648 | 25.1628853 |
| GOTERM_BP_FAT   | GO:0035295~tube development                                     | 13  | 2.4482109  | 0.0169665 | 360 | 218  | 13114 | 2.1722987  | 1.0000000 | 0.7837961 | 25.4481488 |
| GOTERM_BP_FAT   | GO:0030324~lung development                                     | 8   | 1.5065913  | 0.0170388 | 360 | 97   | 13114 | 3.0043528  | 1.0000000 | 0.7703586 | 25.5421137 |
| GOTERM_BP_FAT   | GO:0007409~axonogenesis                                         | 12  | 2.2598870  | 0.0172635 | 360 | 193  | 13114 | 2.2649396  | 1.0000000 | 0.7603791 | 25.8337764 |
| INTERPRO        | IPR001828:Extracellular ligand-binding receptor                 | 5   | 0.9416196  | 0.0174109 | 450 | 36   | 16090 | 4.9660494  | 0.9999995 | 0.8757086 | 23.7351624 |
| GOTERM_CC_FAT   | GO:0030055~cell-substrate junction                              | 9   | 1.6949153  | 0.0174590 | 364 | 112  | 12337 | 2.7235332  | 0.9966173 | 0.2709838 | 21.1809606 |
| GOTERM_BP_FAT   | GO:0030182~neuron differentiation                               | 21  | 3.9548023  | 0.0175327 | 360 | 437  | 13114 | 1.7505339  | 1.0000000 | 0.7517013 | 26.1816044 |
| KEGG_PATHWAY    | hsa00150:Androgen and estrogen metabolism                       | 5   | 0.9416196  | 0.0180531 | 140 | 37   | 5042  | 4.8667954  | 0.8992859 | 0.2795824 | 19.0206928 |
| GOTERM_BP_FAT   | GO:0043129~surfactant homeostasis                               | 3   | 0.5649718  | 0.0187602 | 360 | 8    | 13114 | 13.6604167 | 1.0000000 | 0.7616997 | 27.7486231 |
| GOTERM_BP_FAT   | GO:0048875~chemical homeostasis within a tissue                 | 3   | 0.5649718  | 0.0187602 | 360 | 8    | 13114 | 13.6604167 | 1.0000000 | 0.7616997 | 27.7486231 |
| GOTERM_BP_FAT   | GO:0015909~long-chain fatty acid transport                      | 4   | 0.7532957  | 0.0187686 | 360 | 21   | 13114 | 6.9386243  | 1.0000000 | 0.7488550 | 27.7591749 |
| GOTERM_CC_FAT   | GO:0005913~cell-cell                                            | 5   | 0.9416196  | 0.0188056 | 364 | 35   | 12337 | 4.8418367  | 0.9978278 | 0.2758369 | 22.6282228 |

|                 |                                                          |    |           |           |     |     |       |            |           |           |            |
|-----------------|----------------------------------------------------------|----|-----------|-----------|-----|-----|-------|------------|-----------|-----------|------------|
|                 | adherens junction                                        |    |           |           |     |     |       |            |           |           |            |
| GOTERM_BP_FAT   | GO:0031279~regulation of cyclase activity                | 8  | 1.5065913 | 0.0188614 | 360 | 99  | 13114 | 2.9436588  | 1.0000000 | 0.7379006 | 27.8763890 |
| GOTERM_MF_FAT   | GO:0015171~amino acid transmembrane transporter activity | 6  | 1.1299435 | 0.0190022 | 342 | 57  | 12549 | 3.8624192  | 0.9999844 | 0.7943126 | 24.5600302 |
| GOTERM_CC_FAT   | GO:0030424~axon                                          | 11 | 2.0715631 | 0.0191382 | 364 | 159 | 12337 | 2.3447889  | 0.9980532 | 0.2680756 | 22.9819509 |
| GOTERM_BP_FAT   | GO:0030323~respiratory tube development                  | 8  | 1.5065913 | 0.0198222 | 360 | 100 | 13114 | 2.9142222  | 1.0000000 | 0.7431794 | 29.0789247 |
| SP_PIR_KEYWORDS | cell adhesion                                            | 21 | 3.9548023 | 0.0199808 | 529 | 419 | 18289 | 1.7327646  | 0.9997918 | 0.4541954 | 24.6867331 |
| GOTERM_BP_FAT   | GO:0051339~regulation of lyase activity                  | 8  | 1.5065913 | 0.0208167 | 360 | 101 | 13114 | 2.8853685  | 1.0000000 | 0.7485944 | 30.3037137 |
| SMART           | SM00181:EGF                                              | 12 | 2.2598870 | 0.0208786 | 243 | 199 | 8828  | 2.1907066  | 0.9789580 | 0.8549414 | 22.9419998 |
| GOTERM_MF_FAT   | GO:0015020~glucuronosyltransferase activity              | 4  | 0.7532957 | 0.0208862 | 342 | 22  | 12549 | 6.6714514  | 0.9999949 | 0.7818066 | 26.6606516 |
| SP_PIR_KEYWORDS | Intermediate filament                                    | 7  | 1.3182674 | 0.0211760 | 529 | 75  | 18289 | 3.2267927  | 0.9998753 | 0.4508014 | 25.9666813 |
| GOTERM_BP_FAT   | GO:0034754~cellular hormone metabolic process            | 6  | 1.1299435 | 0.0223893 | 360 | 59  | 13114 | 3.7045198  | 1.0000000 | 0.7626562 | 32.2000769 |
| INTERPRO        | IPR004841:Amino acid permease-associated region          | 4  | 0.7532957 | 0.0224179 | 450 | 22  | 16090 | 6.5010101  | 1.0000000 | 0.9051220 | 29.5150002 |
| GOTERM_MF_FAT   | GO:0051378~serotonin binding                             | 3  | 0.5649718 | 0.0233599 | 342 | 9   | 12549 | 12.2309942 | 0.9999988 | 0.7802792 | 29.3359748 |
| GOTERM_MF_FAT   | GO:0005283~sodium:amino acid symporter activity          | 3  | 0.5649718 | 0.0233599 | 342 | 9   | 12549 | 12.2309942 | 0.9999988 | 0.7802792 | 29.3359748 |
| GOTERM_MF_FAT   | GO:0005326~neurotransmitter transporter activity         | 4  | 0.7532957 | 0.0235465 | 342 | 23  | 12549 | 6.3813883  | 0.9999989 | 0.7471309 | 29.5340571 |

|               |                                                       |    |           |           |     |     |       |            |           |           |            |
|---------------|-------------------------------------------------------|----|-----------|-----------|-----|-----|-------|------------|-----------|-----------|------------|
| GOTERM_BP_FAT | GO:0001523~retinoid metabolic process                 | 4  | 0.7532957 | 0.0240099 | 360 | 23  | 13114 | 6.3352657  | 1.0000000 | 0.7758372 | 34.1032601 |
| GOTERM_BP_FAT | GO:0016101~diterpenoid metabolic process              | 4  | 0.7532957 | 0.0240099 | 360 | 23  | 13114 | 6.3352657  | 1.0000000 | 0.7758372 | 34.1032601 |
| GOTERM_BP_FAT | GO:0006776~vitamin A metabolic process                | 4  | 0.7532957 | 0.0240099 | 360 | 23  | 13114 | 6.3352657  | 1.0000000 | 0.7758372 | 34.1032601 |
| KEGG_PATHWAY  | hsa00980:Metabolism of xenobiotics by cytochrome P450 | 6  | 1.1299435 | 0.0240484 | 140 | 60  | 5042  | 3.6014286  | 0.9534451 | 0.3184532 | 24.5650201 |
| INTERPRO      | IPR006210:EGF-like                                    | 12 | 2.2598870 | 0.0241747 | 450 | 199 | 16090 | 2.1561139  | 1.0000000 | 0.8956026 | 31.4438440 |
| INTERPRO      | IPR002231:5-Hydroxytryptamine receptor                | 3  | 0.5649718 | 0.0245642 | 450 | 9   | 16090 | 11.9185185 | 1.0000000 | 0.8734068 | 31.8648272 |
| GOTERM_BP_FAT | GO:0055065~metal ion homeostasis                      | 12 | 2.2598870 | 0.0248430 | 360 | 204 | 13114 | 2.1428105  | 1.0000000 | 0.7770976 | 35.0619731 |
| KEGG_PATHWAY  | hsa04514:Cell adhesion molecules (CAMs)               | 9  | 1.6949153 | 0.0253068 | 140 | 129 | 5042  | 2.5126246  | 0.9604308 | 0.3015251 | 25.6838536 |
| GOTERM_CC_FAT | GO:0043296~apical junction complex                    | 8  | 1.5065913 | 0.0253916 | 364 | 98  | 12337 | 2.7667638  | 0.9997533 | 0.3267179 | 29.3590389 |
| GOTERM_BP_FAT | GO:0006873~cellular ion homeostasis                   | 18 | 3.3898305 | 0.0268763 | 360 | 371 | 13114 | 1.7673854  | 1.0000000 | 0.7935618 | 37.3470361 |
| GOTERM_BP_FAT | GO:0050905~neuromuscular process                      | 6  | 1.1299435 | 0.0270997 | 360 | 62  | 13114 | 3.5252688  | 1.0000000 | 0.7868145 | 37.5934303 |
| KEGG_PATHWAY  | hsa00982:Drug metabolism                              | 6  | 1.1299435 | 0.0272838 | 140 | 62  | 5042  | 3.4852535  | 0.9693624 | 0.2942914 | 27.4108547 |
| GOTERM_MF_FAT | GO:0030246~carbohydrate binding                       | 17 | 3.2015066 | 0.0274345 | 342 | 347 | 12549 | 1.7976389  | 0.9999999 | 0.7675709 | 33.5453080 |
| KEGG_PATHWAY  | hsa00500:Starch and sucrose metabolism                | 5  | 0.9416196 | 0.0275419 | 140 | 42  | 5042  | 4.2874150  | 0.9703698 | 0.2737823 | 27.6335525 |



|                 |                                                                  |    |           |           |     |     |       |            |           |           |            |
|-----------------|------------------------------------------------------------------|----|-----------|-----------|-----|-----|-------|------------|-----------|-----------|------------|
| GOTERM_BP_FAT   | GO:0022604~regulation of cell morphogenesis                      | 9  | 1.6949153 | 0.0275519 | 360 | 131 | 13114 | 2.5026718  | 1.0000000 | 0.7830491 | 38.0893113 |
| PIR_SUPERFAMILY | PIRSF002282:cytoskeletal keratin                                 | 6  | 1.1299435 | 0.0285227 | 208 | 60  | 7196  | 3.4596154  | 0.9988538 | 0.8953481 | 31.0652896 |
| GOTERM_BP_FAT   | GO:0001654~eye development                                       | 9  | 1.6949153 | 0.0286596 | 360 | 132 | 13114 | 2.4837121  | 1.0000000 | 0.7872078 | 39.2885545 |
| GOTERM_BP_FAT   | GO:0048667~cell morphogenesis involved in neuron differentiation | 12 | 2.2598870 | 0.0289728 | 360 | 209 | 13114 | 2.0915470  | 1.0000000 | 0.7820362 | 39.6236191 |
| GOTERM_BP_FAT   | GO:0008210~estrogen metabolic process                            | 3  | 0.5649718 | 0.0290817 | 360 | 10  | 13114 | 10.9283333 | 1.0000000 | 0.7746333 | 39.7397187 |
| GOTERM_CC_FAT   | GO:0016327~apicolateral plasma membrane                          | 8  | 1.5065913 | 0.0293283 | 364 | 101 | 12337 | 2.6845827  | 0.9999333 | 0.3540499 | 33.1189634 |
| GOTERM_MF_FAT   | GO:0005343~organic acid:sodium symporter activity                | 4  | 0.7532957 | 0.0293907 | 342 | 25  | 12549 | 5.8708772  | 1.0000000 | 0.7617390 | 35.4821736 |
| SP_PIR_KEYWORDS | Immunoglobulin domain                                            | 21 | 3.9548023 | 0.0296508 | 529 | 437 | 18289 | 1.6613921  | 0.9999968 | 0.5462038 | 34.4794930 |
| GOTERM_BP_FAT   | GO:0006721~terpenoid metabolic process                           | 4  | 0.7532957 | 0.0299601 | 360 | 25  | 13114 | 5.8284444  | 1.0000000 | 0.7762731 | 40.6685144 |
| GOTERM_CC_FAT   | GO:0019898~extrinsic to membrane                                 | 23 | 4.3314501 | 0.0300279 | 364 | 486 | 12337 | 1.6039830  | 0.9999471 | 0.3482910 | 33.7674522 |
| GOTERM_BP_FAT   | GO:0009719~response to endogenous stimulus                       | 19 | 3.5781544 | 0.0300968 | 360 | 405 | 13114 | 1.7089575  | 1.0000000 | 0.7695165 | 40.8118200 |
| GOTERM_BP_FAT   | GO:0055082~cellular chemical homeostasis                         | 18 | 3.3898305 | 0.0305653 | 360 | 377 | 13114 | 1.7392573  | 1.0000000 | 0.7666662 | 41.3005888 |
| GOTERM_MF_FAT   | GO:0005044~scavenger receptor activity                           | 5  | 0.9416196 | 0.0309900 | 342 | 44  | 12549 | 4.1696571  | 1.0000000 | 0.7527221 | 37.0263073 |
| SP_PIR_KEYWORDS | microsome                                                        | 8  | 1.5065913 | 0.0310185 | 529 | 104 | 18289 | 2.6594445  | 0.9999982 | 0.5408948 | 35.7648286 |

|               |                                                             |    |            |           |     |      |       |            |           |           |            |
|---------------|-------------------------------------------------------------|----|------------|-----------|-----|------|-------|------------|-----------|-----------|------------|
| GOTERM_BP_FAT | GO:0001655~urogenital system development                    | 8  | 1.5065913  | 0.0313652 | 360 | 110  | 13114 | 2.6492929  | 1.0000000 | 0.7675878 | 42.1263492 |
| GOTERM_BP_FAT | GO:0006720~isoprenoid metabolic process                     | 5  | 0.9416196  | 0.0317348 | 360 | 44   | 13114 | 4.1395202  | 1.0000000 | 0.7638179 | 42.5040717 |
| GOTERM_BP_FAT | GO:0007166~cell surface receptor linked signal transduction | 62 | 11.6760829 | 0.0323017 | 360 | 1769 | 13114 | 1.2767226  | 1.0000000 | 0.7622913 | 43.0790928 |
| GOTERM_BP_FAT | GO:0006022~aminoglycan metabolic process                    | 6  | 1.1299435  | 0.0323978 | 360 | 65   | 13114 | 3.3625641  | 1.0000000 | 0.7557906 | 43.1760633 |
| GOTERM_BP_FAT | GO:0007610~behavior                                         | 21 | 3.9548023  | 0.0324190 | 360 | 467  | 13114 | 1.6380799  | 1.0000000 | 0.7485852 | 43.1973889 |
| GOTERM_BP_FAT | GO:0048812~neuron projection morphogenesis                  | 12 | 2.2598870  | 0.0324474 | 360 | 213  | 13114 | 2.0522692  | 1.0000000 | 0.7415596 | 43.2259630 |
| GOTERM_MF_FAT | GO:0019212~phosphatase inhibitor activity                   | 4  | 0.7532957  | 0.0325734 | 342 | 26   | 12549 | 5.6450742  | 1.0000000 | 0.7445788 | 38.5211839 |
| GOTERM_BP_FAT | GO:0055074~calcium ion homeostasis                          | 11 | 2.0715631  | 0.0331686 | 360 | 187  | 13114 | 2.1428105  | 1.0000000 | 0.7421665 | 43.9479073 |
| GOTERM_CC_FAT | GO:0005916~fascia adherens                                  | 3  | 0.5649718  | 0.0332337 | 364 | 10   | 12337 | 10.1678571 | 0.9999819 | 0.3654701 | 36.6651397 |
| GOTERM_CC_FAT | GO:0042995~cell projection                                  | 30 | 5.6497175  | 0.0350787 | 364 | 693  | 12337 | 1.4672233  | 0.9999902 | 0.3695724 | 38.2791804 |
| GOTERM_BP_FAT | GO:0031344~regulation of cell projection organization       | 7  | 1.3182674  | 0.0351640 | 360 | 89   | 13114 | 2.8651061  | 1.0000000 | 0.7557812 | 45.9004725 |
| GOTERM_BP_FAT | GO:0042592~homeostatic process                              | 30 | 5.6497175  | 0.0353505 | 360 | 745  | 13114 | 1.4668904  | 1.0000000 | 0.7508041 | 46.0797215 |
| OMIM_DISEASE  | Asthma, susceptibility to                                   | 3  | 0.5649718  | 0.0354021 | 104 | 9    | 3023  | 9.6891026  | 0.9994839 | 0.9994839 | 36.5794061 |
| GOTERM_MF_FAT | GO:0005509~calcium ion binding                              | 35 | 6.5913371  | 0.0359468 | 342 | 910  | 12549 | 1.4112686  | 1.0000000 | 0.7554218 | 41.5963740 |
| KEGG_PATHWAY  | hsa00140:Steroid hormone biosynthesis                       | 5  | 0.9416196  | 0.0369281 | 140 | 46   | 5042  | 3.9145963  | 0.9912703 | 0.3263776 | 35.3218973 |

|                 |                                                                               |    |           |           |     |     |       |           |           |           |            |
|-----------------|-------------------------------------------------------------------------------|----|-----------|-----------|-----|-----|-------|-----------|-----------|-----------|------------|
| SP_PIR_KEYWORDS | pharmaceutical                                                                | 5  | 0.9416196 | 0.0375622 | 529 | 44  | 18289 | 3.9287249 | 0.9999999 | 0.5907118 | 41.5970266 |
| GOTERM_BP_FAT   | GO:0007187~G-protein signaling, coupled to cyclic nucleotide second messenger | 8  | 1.5065913 | 0.0385469 | 360 | 115 | 13114 | 2.5341063 | 1.0000000 | 0.7742822 | 49.0652034 |
| GOTERM_BP_FAT   | GO:0048545~response to steroid hormone stimulus                               | 11 | 2.0715631 | 0.0385504 | 360 | 192 | 13114 | 2.0870081 | 1.0000000 | 0.7678845 | 49.0683737 |
| GOTERM_BP_FAT   | GO:0010648~negative regulation of cell communication                          | 13 | 2.4482109 | 0.0393877 | 360 | 247 | 13114 | 1.9172515 | 1.0000000 | 0.7689782 | 49.8242827 |
| GOTERM_BP_FAT   | GO:0015908~fatty acid transport                                               | 4  | 0.7532957 | 0.0401998 | 360 | 28  | 13114 | 5.2039683 | 1.0000000 | 0.7698169 | 50.5472961 |
| GOTERM_BP_FAT   | GO:0000272~polysaccharide catabolic process                                   | 4  | 0.7532957 | 0.0401998 | 360 | 28  | 13114 | 5.2039683 | 1.0000000 | 0.7698169 | 50.5472961 |
| GOTERM_MF_FAT   | GO:0005416~cation:amino acid symporter activity                               | 3  | 0.5649718 | 0.0405941 | 342 | 12  | 12549 | 9.1732456 | 1.0000000 | 0.7756321 | 45.5985052 |
| GOTERM_BP_FAT   | GO:0048048~embryonic eye morphogenesis                                        | 3  | 0.5649718 | 0.0411484 | 360 | 12  | 13114 | 9.1069444 | 1.0000000 | 0.7717733 | 51.3793797 |
| GOTERM_BP_FAT   | GO:0042573~retinoic acid metabolic process                                    | 3  | 0.5649718 | 0.0411484 | 360 | 12  | 13114 | 9.1069444 | 1.0000000 | 0.7717733 | 51.3793797 |
| GOTERM_BP_FAT   | GO:0006875~cellular metal ion homeostasis                                     | 11 | 2.0715631 | 0.0420772 | 360 | 195 | 13114 | 2.0549003 | 1.0000000 | 0.7734922 | 52.1814059 |
| GOTERM_BP_FAT   | GO:0006811~ion transport                                                      | 30 | 5.6497175 | 0.0424424 | 360 | 757 | 13114 | 1.4436372 | 1.0000000 | 0.7706069 | 52.4933209 |
| GOTERM_MF_FAT   | GO:0030594~neurotransmitter receptor activity                                 | 7  | 1.3182674 | 0.0427499 | 342 | 94  | 12549 | 2.7324561 | 1.0000000 | 0.7730239 | 47.3668876 |
| GOTERM_CC_FAT   | GO:0044463~cell projection part                                               | 13 | 2.4482109 | 0.0429599 | 364 | 233 | 12337 | 1.8910178 | 0.9999993 | 0.4204464 | 44.7541067 |
| GOTERM_CC_FAT   | GO:0031012~extracellular matrix                                               | 17 | 3.2015066 | 0.0429952 | 364 | 339 | 12337 | 1.6996418 | 0.9999993 | 0.4088788 | 44.7815991 |

|                 |                                                                 |    |           |           |     |     |       |           |           |           |            |
|-----------------|-----------------------------------------------------------------|----|-----------|-----------|-----|-----|-------|-----------|-----------|-----------|------------|
| GOTERM_MF_FAT   | GO:0042277~peptide binding                                      | 11 | 2.0715631 | 0.0430664 | 342 | 197 | 12549 | 2.0488467 | 1.0000000 | 0.7561318 | 47.6219669 |
| GOTERM_MF_FAT   | GO:0042562~hormone binding                                      | 5  | 0.9416196 | 0.0435793 | 342 | 49  | 12549 | 3.7441819 | 1.0000000 | 0.7415718 | 48.0328277 |
| INTERPRO        | IPR007110:Immunoglobulin-like                                   | 19 | 3.5781544 | 0.0439235 | 450 | 416 | 16090 | 1.6330662 | 1.0000000 | 0.9664024 | 49.9889293 |
| GOTERM_MF_FAT   | GO:0008509~anion transmembrane transporter activity             | 9  | 1.6949153 | 0.0442781 | 342 | 145 | 12549 | 2.2774955 | 1.0000000 | 0.7292523 | 48.5878428 |
| GOTERM_CC_FAT   | GO:0043005~neuron projection                                    | 17 | 3.2015066 | 0.0445422 | 364 | 341 | 12337 | 1.6896732 | 0.9999996 | 0.4088120 | 45.9757378 |
| GOTERM_BP_FAT   | GO:0010517~regulation of phospholipase activity                 | 6  | 1.1299435 | 0.0448192 | 360 | 71  | 13114 | 3.0784038 | 1.0000000 | 0.7835293 | 54.4768659 |
| SP_PIR_KEYWORDS | ion transport                                                   | 25 | 4.7080979 | 0.0451909 | 529 | 574 | 18289 | 1.5057830 | 1.0000000 | 0.6402093 | 47.7740389 |
| GOTERM_BP_FAT   | GO:0009725~response to hormone stimulus                         | 17 | 3.2015066 | 0.0455467 | 360 | 367 | 13114 | 1.6873903 | 1.0000000 | 0.7834214 | 55.0683191 |
| GOTERM_MF_FAT   | GO:0005230~extracellular ligand-gated ion channel activity      | 6  | 1.1299435 | 0.0458880 | 342 | 72  | 12549 | 3.0577485 | 1.0000000 | 0.7249143 | 49.8454944 |
| GOTERM_MF_FAT   | GO:0004993~serotonin receptor activity                          | 3  | 0.5649718 | 0.0471304 | 342 | 13  | 12549 | 8.4676113 | 1.0000000 | 0.7180933 | 50.7963703 |
| GOTERM_BP_FAT   | GO:0032102~negative regulation of response to external stimulus | 5  | 0.9416196 | 0.0474645 | 360 | 50  | 13114 | 3.6427778 | 1.0000000 | 0.7918809 | 56.5927877 |
| GOTERM_BP_FAT   | GO:0048854~brain morphogenesis                                  | 3  | 0.5649718 | 0.0477674 | 360 | 13  | 13114 | 8.4064103 | 1.0000000 | 0.7886902 | 56.8291050 |
| GOTERM_BP_FAT   | GO:0007605~sensory perception of sound                          | 7  | 1.3182674 | 0.0480022 | 360 | 96  | 13114 | 2.6561921 | 1.0000000 | 0.7850745 | 57.0114214 |
| GOTERM_MF_FAT   | GO:0015370~solute:sodium                                        | 5  | 0.9416196 | 0.0493086 | 342 | 51  | 12549 | 3.5973512 | 1.0000000 | 0.7187588 | 52.4231190 |

|                 |                                                                                        |    |           |           |     |     |       |            |           |           |            |
|-----------------|----------------------------------------------------------------------------------------|----|-----------|-----------|-----|-----|-------|------------|-----------|-----------|------------|
|                 | symporter activity                                                                     |    |           |           |     |     |       |            |           |           |            |
| GOTERM_BP_FAT   | GO:0031175~neuron projection development                                               | 13 | 2.4482109 | 0.0493178 | 360 | 256 | 13114 | 1.8498481  | 1.0000000 | 0.7890185 | 58.0196249 |
| GOTERM_BP_FAT   | GO:0032990~cell part morphogenesis                                                     | 13 | 2.4482109 | 0.0493178 | 360 | 256 | 13114 | 1.8498481  | 1.0000000 | 0.7890185 | 58.0196249 |
| INTERPRO        | IPR002293:Amino acid/polyamine transporter I                                           | 3  | 0.5649718 | 0.0494617 | 450 | 13  | 16090 | 8.2512821  | 1.0000000 | 0.9701877 | 54.2760518 |
| GOTERM_MF_FAT   | GO:0005543~phospholipid binding                                                        | 10 | 1.8832392 | 0.0495598 | 342 | 175 | 12549 | 2.0967419  | 1.0000000 | 0.7053713 | 52.6074478 |
| SP_PIR_KEYWORDS | acute phase                                                                            | 4  | 0.7532957 | 0.0501773 | 529 | 29  | 18289 | 4.7686591  | 1.0000000 | 0.6607708 | 51.4774936 |
| GOTERM_BP_FAT   | GO:0007423~sensory organ development                                                   | 12 | 2.2598870 | 0.0505166 | 360 | 229 | 13114 | 1.9088792  | 1.0000000 | 0.7920110 | 58.9189451 |
| GOTERM_MF_FAT   | GO:0005200~structural constituent of cytoskeleton                                      | 6  | 1.1299435 | 0.0506085 | 342 | 74  | 12549 | 2.9751067  | 1.0000000 | 0.6983952 | 53.3698445 |
| SP_PIR_KEYWORDS | G protein-coupled receptor                                                             | 8  | 1.5065913 | 0.0510319 | 529 | 116 | 18289 | 2.3843296  | 1.0000000 | 0.6492218 | 52.0871299 |
| GOTERM_MF_FAT   | GO:0008066~glutamate receptor activity                                                 | 4  | 0.7532957 | 0.0510331 | 342 | 31  | 12549 | 4.7345784  | 1.0000000 | 0.6872850 | 53.6752470 |
| PIR_SUPERFAMILY | PIRSF006060:AA_transporter                                                             | 3  | 0.5649718 | 0.0521517 | 208 | 13  | 7196  | 7.9837278  | 0.9999964 | 0.9564265 | 49.7701960 |
| GOTERM_MF_FAT   | GO:0019208~phosphatase regulator activity                                              | 5  | 0.9416196 | 0.0523214 | 342 | 52  | 12549 | 3.5281714  | 1.0000000 | 0.6828695 | 54.5906150 |
| GOTERM_BP_FAT   | GO:0019725~cellular homeostasis                                                        | 20 | 3.7664783 | 0.0530124 | 360 | 463 | 13114 | 1.5735541  | 1.0000000 | 0.8030886 | 60.7333281 |
| GOTERM_BP_FAT   | GO:0045744~negative regulation of G-protein coupled receptor protein signaling pathway | 3  | 0.5649718 | 0.0547427 | 360 | 14  | 13114 | 7.8059524  | 1.0000000 | 0.8088110 | 61.9466001 |
| INTERPRO        | IPR002152:Glycoside                                                                    | 2  | 0.3766478 | 0.0550340 | 450 | 2   | 16090 | 35.7555556 | 1.0000000 | 0.9731759 | 58.2407469 |

|                 |                                                  |    |           |           |     |     |       |            |           |           |            |
|-----------------|--------------------------------------------------|----|-----------|-----------|-----|-----|-------|------------|-----------|-----------|------------|
|                 | hydrolase, family 23                             |    |           |           |     |     |       |            |           |           |            |
| GOTERM_MF_FAT   | GO:0030247~polysaccharide binding                | 9  | 1.6949153 | 0.0555735 | 342 | 152 | 12549 | 2.1726108  | 1.0000000 | 0.6921872 | 56.8267600 |
| GOTERM_MF_FAT   | GO:0001871~pattern binding                       | 9  | 1.6949153 | 0.0555735 | 342 | 152 | 12549 | 2.1726108  | 1.0000000 | 0.6921872 | 56.8267600 |
| INTERPRO        | IPR011500:GPCR, family 3, nine cysteines region  | 3  | 0.5649718 | 0.0566642 | 450 | 14  | 16090 | 7.6619048  | 1.0000000 | 0.9686480 | 59.3383591 |
| INTERPRO        | IPR000337:GPCR, family 3                         | 3  | 0.5649718 | 0.0566642 | 450 | 14  | 16090 | 7.6619048  | 1.0000000 | 0.9686480 | 59.3383591 |
| PIR_SUPERFAMILY | PIRSF001065:lysozyme g                           | 2  | 0.3766478 | 0.0567084 | 208 | 2   | 7196  | 34.5961538 | 0.9999988 | 0.9349223 | 52.7875769 |
| PIR_SUPERFAMILY | PIRSF001065:Lysozyme_g                           | 2  | 0.3766478 | 0.0567084 | 208 | 2   | 7196  | 34.5961538 | 0.9999988 | 0.9349223 | 52.7875769 |
| INTERPRO        | IPR013783:Immunoglobulin-like fold               | 20 | 3.7664783 | 0.0570019 | 450 | 459 | 16090 | 1.5579763  | 1.0000000 | 0.9612831 | 59.5623082 |
| GOTERM_BP_FAT   | GO:0019226~transmission of nerve impulse         | 16 | 3.0131827 | 0.0572398 | 360 | 349 | 13114 | 1.6700414  | 1.0000000 | 0.8185466 | 63.6354719 |
| GOTERM_BP_FAT   | GO:0019932~second-messenger-mediated signaling   | 12 | 2.2598870 | 0.0572525 | 360 | 234 | 13114 | 1.8680912  | 1.0000000 | 0.8140735 | 63.6438528 |
| SP_PIR_KEYWORDS | calcium                                          | 32 | 6.0263653 | 0.0575265 | 529 | 798 | 18289 | 1.3863771  | 1.0000000 | 0.6773180 | 56.4932016 |
| GOTERM_BP_FAT   | GO:0008360~regulation of cell shape              | 5  | 0.9416196 | 0.0599564 | 360 | 54  | 13114 | 3.3729424  | 1.0000000 | 0.8243325 | 65.3925236 |
| GOTERM_CC_FAT   | GO:0070160~occluding junction                    | 6  | 1.1299435 | 0.0605867 | 364 | 72  | 12337 | 2.8244048  | 1.0000000 | 0.5014833 | 57.0265942 |
| GOTERM_CC_FAT   | GO:0005923~tight junction                        | 6  | 1.1299435 | 0.0605867 | 364 | 72  | 12337 | 2.8244048  | 1.0000000 | 0.5014833 | 57.0265942 |
| GOTERM_BP_FAT   | GO:0006775~fat-soluble vitamin metabolic process | 4  | 0.7532957 | 0.0606455 | 360 | 33  | 13114 | 4.4154882  | 1.0000000 | 0.8236007 | 65.8253536 |

|                 |                                                      |    |           |           |     |     |       |           |           |           |            |
|-----------------|------------------------------------------------------|----|-----------|-----------|-----|-----|-------|-----------|-----------|-----------|------------|
| GOTERM_CC_FAT   | GO:0044456~synapse part                              | 13 | 2.4482109 | 0.0607026 | 364 | 246 | 12337 | 1.7910859 | 1.0000000 | 0.4904575 | 57.0981511 |
| GOTERM_BP_FAT   | GO:0050954~sensory perception of mechanical stimulus | 7  | 1.3182674 | 0.0610430 | 360 | 102 | 13114 | 2.4999455 | 1.0000000 | 0.8213774 | 66.0726453 |
| SMART           | SM00198:SCP                                          | 3  | 0.5649718 | 0.0621541 | 243 | 15  | 8828  | 7.2658436 | 0.9999921 | 0.9800464 | 54.7328830 |
| GOTERM_BP_FAT   | GO:0006874~cellular calcium ion homeostasis          | 10 | 1.8832392 | 0.0629012 | 360 | 182 | 13114 | 2.0015263 | 1.0000000 | 0.8266283 | 67.2067069 |
| GOTERM_BP_FAT   | GO:0030203~glycosaminoglycan metabolic process       | 5  | 0.9416196 | 0.0633267 | 360 | 55  | 13114 | 3.3116162 | 1.0000000 | 0.8246061 | 67.4612958 |
| INTERPRO        | IPR002190:MAGE protein                               | 4  | 0.7532957 | 0.0635465 | 450 | 33  | 16090 | 4.3340067 | 1.0000000 | 0.9669580 | 63.6816045 |
| GOTERM_BP_FAT   | GO:0007267~cell-cell signaling                       | 24 | 4.5197740 | 0.0636341 | 360 | 599 | 13114 | 1.4595437 | 1.0000000 | 0.8220279 | 67.6440679 |
| SP_PIR_KEYWORDS | hexosyltransferase                                   | 4  | 0.7532957 | 0.0639787 | 529 | 32  | 18289 | 4.3215974 | 1.0000000 | 0.7010130 | 60.4953081 |
| INTERPRO        | IPR014044:SCP-like extracellular                     | 3  | 0.5649718 | 0.0642050 | 450 | 15  | 16090 | 7.1511111 | 1.0000000 | 0.9609838 | 64.0736191 |
| INTERPRO        | IPR001283:Allergen V5/Tpx-1 related                  | 3  | 0.5649718 | 0.0642050 | 450 | 15  | 16090 | 7.1511111 | 1.0000000 | 0.9609838 | 64.0736191 |
| GOTERM_BP_FAT   | GO:0007268~synaptic transmission                     | 14 | 2.6365348 | 0.0650625 | 360 | 297 | 13114 | 1.7171343 | 1.0000000 | 0.8250002 | 68.4808321 |
| KEGG_PATHWAY    | hsa00650:Butanoate metabolism                        | 4  | 0.7532957 | 0.0659358 | 140 | 34  | 5042  | 4.2369748 | 0.9998149 | 0.4837240 | 54.6118009 |
| GOTERM_BP_FAT   | GO:0019935~cyclic-nucleotide-mediated signaling      | 8  | 1.5065913 | 0.0662260 | 360 | 130 | 13114 | 2.2417094 | 1.0000000 | 0.8266036 | 69.1472291 |
| GOTERM_BP_FAT   | GO:0043627~response to estrogen stimulus             | 7  | 1.3182674 | 0.0682787 | 360 | 105 | 13114 | 2.4285185 | 1.0000000 | 0.8322474 | 70.2907498 |
| GOTERM_BP_FAT   | GO:0006825~copper ion                                | 3  | 0.5649718 | 0.0696655 | 360 | 16  | 13114 | 6.8302083 | 1.0000000 | 0.8346668 | 71.0406012 |

|               |                                                                             |    |           |           |     |     |       |           |           |           |            |
|---------------|-----------------------------------------------------------------------------|----|-----------|-----------|-----|-----|-------|-----------|-----------|-----------|------------|
|               | transport                                                                   |    |           |           |     |     |       |           |           |           |            |
| SMART         | SM00352:POU                                                                 | 3  | 0.5649718 | 0.0697836 | 243 | 16  | 8828  | 6.8117284 | 0.9999982 | 0.9634644 | 59.0771727 |
| GOTERM_BP_FAT | GO:0050885~neuromuscular process controlling balance                        | 4  | 0.7532957 | 0.0699435 | 360 | 35  | 13114 | 4.1631746 | 1.0000000 | 0.8321445 | 71.1887698 |
| GOTERM_BP_FAT | GO:0042445~hormone metabolic process                                        | 7  | 1.3182674 | 0.0707967 | 360 | 106 | 13114 | 2.4056080 | 1.0000000 | 0.8321907 | 71.6389835 |
| GOTERM_MF_FAT | GO:0042626~ATPase activity, coupled to transmembrane movement of substances | 7  | 1.3182674 | 0.0713130 | 342 | 107 | 12549 | 2.4004755 | 1.0000000 | 0.7705377 | 66.2717444 |
| GOTERM_CC_FAT | GO:0005624~membrane fraction                                                | 32 | 6.0263653 | 0.0714237 | 364 | 801 | 12337 | 1.3540218 | 1.0000000 | 0.5379597 | 63.2629870 |
| GOTERM_BP_FAT | GO:0042493~response to drug                                                 | 11 | 2.0715631 | 0.0716243 | 360 | 215 | 13114 | 1.8637468 | 1.0000000 | 0.8321287 | 72.0694210 |
| INTERPRO      | IPR000327:POU-specific                                                      | 3  | 0.5649718 | 0.0720598 | 450 | 16  | 16090 | 6.7041667 | 1.0000000 | 0.9683404 | 68.4542728 |
| GOTERM_BP_FAT | GO:0000904~cell morphogenesis involved in differentiation                   | 12 | 2.2598870 | 0.0724214 | 360 | 244 | 13114 | 1.7915301 | 1.0000000 | 0.8319400 | 72.4781394 |
| GOTERM_BP_FAT | GO:0043010~camera-type eye development                                      | 7  | 1.3182674 | 0.0733676 | 360 | 107 | 13114 | 2.3831256 | 1.0000000 | 0.8323916 | 72.9559730 |
| GOTERM_BP_FAT | GO:0048858~cell projection morphogenesis                                    | 12 | 2.2598870 | 0.0738065 | 360 | 245 | 13114 | 1.7842177 | 1.0000000 | 0.8307007 | 73.1749792 |
| GOTERM_BP_FAT | GO:0042060~wound healing                                                    | 10 | 1.8832392 | 0.0738167 | 360 | 188 | 13114 | 1.9376478 | 1.0000000 | 0.8272114 | 73.1800338 |
| GOTERM_MF_FAT | GO:0043492~ATPase activity, coupled to movement of substances               | 7  | 1.3182674 | 0.0738753 | 342 | 108 | 12549 | 2.3782489 | 1.0000000 | 0.7714701 | 67.6132603 |
| INTERPRO      | IPR001128:Cytochrome P450                                                   | 5  | 0.9416196 | 0.0744382 | 450 | 57  | 16090 | 3.1364522 | 1.0000000 | 0.9660626 | 69.6787895 |



|               |                                                                                                           |    |           |           |     |      |       |           |           |           |            |
|---------------|-----------------------------------------------------------------------------------------------------------|----|-----------|-----------|-----|------|-------|-----------|-----------|-----------|------------|
| GOTERM_BP_FAT | GO:0050906~detection of stimulus involved in sensory perception                                           | 4  | 0.7532957 | 0.0748193 | 360 | 36   | 13114 | 4.0475309 | 1.0000000 | 0.8279583 | 73.6739471 |
| GOTERM_BP_FAT | GO:0005976~polysaccharide metabolic process                                                               | 7  | 1.3182674 | 0.0759914 | 360 | 108  | 13114 | 2.3610597 | 1.0000000 | 0.8293913 | 74.2405013 |
| GOTERM_BP_FAT | GO:0050877~neurological system process                                                                    | 41 | 7.7212806 | 0.0764219 | 360 | 1160 | 13114 | 1.2875335 | 1.0000000 | 0.8277527 | 74.4457223 |
| GOTERM_MF_FAT | GO:0016820~hydrolase activity, acting on acid anhydrides, catalyzing transmembrane movement of substances | 7  | 1.3182674 | 0.0764896 | 342 | 109  | 12549 | 2.3564301 | 1.0000000 | 0.7726099 | 68.9306435 |
| GOTERM_MF_FAT | GO:0005246~calcium channel regulator activity                                                             | 3  | 0.5649718 | 0.0765736 | 342 | 17   | 12549 | 6.4752322 | 1.0000000 | 0.7622282 | 68.9721228 |
| SMART         | SM00233:PH                                                                                                | 13 | 2.4482109 | 0.0770083 | 243 | 276  | 8828  | 1.7111588 | 0.9999996 | 0.9467598 | 62.8343732 |
| GOTERM_BP_FAT | GO:0051241~negative regulation of multicellular organismal process                                        | 9  | 1.6949153 | 0.0772268 | 360 | 162  | 13114 | 2.0237654 | 1.0000000 | 0.8276719 | 74.8252199 |
| GOTERM_BP_FAT | GO:0045785~positive regulation of cell adhesion                                                           | 5  | 0.9416196 | 0.0777740 | 360 | 59   | 13114 | 3.0870998 | 1.0000000 | 0.8265505 | 75.0802319 |
| INTERPRO      | IPR008250:ATPase, P-type, ATPase-associated region                                                        | 4  | 0.7532957 | 0.0783068 | 450 | 36   | 16090 | 3.9728395 | 1.0000000 | 0.9662274 | 71.5760035 |
| INTERPRO      | IPR018303:ATPase, P-type phosphorylation site                                                             | 4  | 0.7532957 | 0.0783068 | 450 | 36   | 16090 | 3.9728395 | 1.0000000 | 0.9662274 | 71.5760035 |
| INTERPRO      | IPR001757:ATPase, P-type, K/Mg/Cd/Cu/Zn/Na/Ca/Na/H-transporter                                            | 4  | 0.7532957 | 0.0783068 | 450 | 36   | 16090 | 3.9728395 | 1.0000000 | 0.9662274 | 71.5760035 |
| GOTERM_BP_FAT | GO:0007204~elevation of cytosolic calcium ion concentration                                               | 7  | 1.3182674 | 0.0786678 | 360 | 109  | 13114 | 2.3393986 | 1.0000000 | 0.8268469 | 75.4914815 |

|                 |                                                                                     |    |           |           |     |     |       |            |           |           |            |
|-----------------|-------------------------------------------------------------------------------------|----|-----------|-----------|-----|-----|-------|------------|-----------|-----------|------------|
| GOTERM_MF_FAT   | GO:0005294~neutral L-amino acid secondary active transmembrane transporter activity | 2  | 0.3766478 | 0.0793315 | 342 | 3   | 12549 | 24.4619883 | 1.0000000 | 0.7643043 | 70.3059486 |
| INTERPRO        | IPR013847:POU                                                                       | 3  | 0.5649718 | 0.0802053 | 450 | 17  | 16090 | 6.3098039  | 1.0000000 | 0.9634239 | 72.4659084 |
| GOTERM_CC_FAT   | GO:0005578~proteinaceous extracellular matrix                                       | 15 | 2.8248588 | 0.0811494 | 364 | 315 | 12337 | 1.6139456  | 1.0000000 | 0.5743985 | 68.1352060 |
| INTERPRO        | IPR001117:Multicopper oxidase, type 1                                               | 2  | 0.3766478 | 0.0814071 | 450 | 3   | 16090 | 23.8370370 | 1.0000000 | 0.9595370 | 73.0157003 |
| INTERPRO        | IPR004294:Carotenoid oxygenase                                                      | 2  | 0.3766478 | 0.0814071 | 450 | 3   | 16090 | 23.8370370 | 1.0000000 | 0.9595370 | 73.0157003 |
| INTERPRO        | IPR009523:Prokineticin                                                              | 2  | 0.3766478 | 0.0814071 | 450 | 3   | 16090 | 23.8370370 | 1.0000000 | 0.9595370 | 73.0157003 |
| GOTERM_BP_FAT   | GO:0048666~neuron development                                                       | 15 | 2.8248588 | 0.0816286 | 360 | 338 | 13114 | 1.6166174  | 1.0000000 | 0.8351750 | 76.8086142 |
| INTERPRO        | IPR017972:Cytochrome P450, conserved site                                           | 5  | 0.9416196 | 0.0822159 | 450 | 59  | 16090 | 3.0301318  | 1.0000000 | 0.9549392 | 73.3799062 |
| INTERPRO        | IPR000742:EGF-like, type 3                                                          | 10 | 1.8832392 | 0.0833094 | 450 | 189 | 16090 | 1.8918283  | 1.0000000 | 0.9508001 | 73.8649989 |
| GOTERM_BP_FAT   | GO:0007188~G-protein signaling, coupled to cAMP nucleotide second messenger         | 6  | 1.1299435 | 0.0834941 | 360 | 85  | 13114 | 2.5713725  | 1.0000000 | 0.8389893 | 77.6039612 |
| PIR_SUPERFAMILY | PIRSF008887:human CAGR1 protein                                                     | 2  | 0.3766478 | 0.0838506 | 208 | 3   | 7196  | 23.0641026 | 1.0000000 | 0.9671386 | 67.5623074 |
| SP_PIR_KEYWORDS | glycosyltransferase                                                                 | 11 | 2.0715631 | 0.0841780 | 529 | 210 | 18289 | 1.8109551  | 1.0000000 | 0.7853683 | 70.9224581 |
| GOTERM_MF_FAT   | GO:0001653~peptide receptor activity                                                | 7  | 1.3182674 | 0.0846433 | 342 | 112 | 12549 | 2.2933114  | 1.0000000 | 0.7770712 | 72.7256732 |
| GOTERM_MF_FAT   | GO:0008528~peptide receptor activity, G-protein coupled                             | 7  | 1.3182674 | 0.0846433 | 342 | 112 | 12549 | 2.2933114  | 1.0000000 | 0.7770712 | 72.7256732 |

|                 |                                                                       |    |           |           |     |     |       |           |           |           |            |
|-----------------|-----------------------------------------------------------------------|----|-----------|-----------|-----|-----|-------|-----------|-----------|-----------|------------|
| GOTERM_BP_FAT   | GO:0030003~cellular cation homeostasis                                | 12 | 2.2598870 | 0.0862259 | 360 | 252 | 13114 | 1.7346561 | 1.0000000 | 0.8457115 | 78.7224128 |
| INTERPRO        | IPR001849:Pleckstrin homology                                         | 13 | 2.4482109 | 0.0868393 | 450 | 276 | 16090 | 1.6841385 | 1.0000000 | 0.9511809 | 75.3751220 |
| GOTERM_BP_FAT   | GO:0010033~response to organic substance                              | 27 | 5.0847458 | 0.0871513 | 360 | 716 | 13114 | 1.3736732 | 1.0000000 | 0.8459141 | 79.0892157 |
| GOTERM_BP_FAT   | GO:0050878~regulation of body fluid levels                            | 8  | 1.5065913 | 0.0874126 | 360 | 139 | 13114 | 2.0965627 | 1.0000000 | 0.8438247 | 79.1917107 |
| GOTERM_BP_FAT   | GO:0055085~transmembrane transport                                    | 22 | 4.1431262 | 0.0878909 | 360 | 560 | 13114 | 1.4310913 | 1.0000000 | 0.8425052 | 79.3780952 |
| SP_PIR_KEYWORDS | cleavage on pair of basic residues                                    | 13 | 2.4482109 | 0.0891880 | 529 | 269 | 18289 | 1.6708034 | 1.0000000 | 0.7918374 | 73.0788946 |
| BIOCARTA        | h_nuclearRsPathway:Nuclear Receptors in Lipid Metabolism and Toxicity | 4  | 0.7532957 | 0.0894332 | 43  | 36  | 1406  | 3.6330749 | 0.9997373 | 0.9997373 | 63.7521530 |
| GOTERM_BP_FAT   | GO:0060191~regulation of lipase activity                              | 6  | 1.1299435 | 0.0901126 | 360 | 87  | 13114 | 2.5122605 | 1.0000000 | 0.8471345 | 80.2233801 |
| GOTERM_BP_FAT   | GO:0007613~memory                                                     | 4  | 0.7532957 | 0.0903087 | 360 | 39  | 13114 | 3.7361823 | 1.0000000 | 0.8448958 | 80.2963930 |
| SP_PIR_KEYWORDS | tumor antigen                                                         | 4  | 0.7532957 | 0.0903605 | 529 | 37  | 18289 | 3.7375977 | 1.0000000 | 0.7834386 | 73.5616420 |
| GOTERM_BP_FAT   | GO:0030005~cellular di-, trivalent inorganic cation homeostasis       | 11 | 2.0715631 | 0.0903819 | 360 | 225 | 13114 | 1.7809136 | 1.0000000 | 0.8422550 | 80.3235921 |
| SP_PIR_KEYWORDS | palmitate                                                             | 11 | 2.0715631 | 0.0905270 | 529 | 213 | 18289 | 1.7854487 | 1.0000000 | 0.7714651 | 73.6295322 |
| GOTERM_BP_FAT   | GO:0003002~regionalization                                            | 10 | 1.8832392 | 0.0920435 | 360 | 197 | 13114 | 1.8491258 | 1.0000000 | 0.8449431 | 80.9313967 |
| GOTERM_MF_FAT   | GO:0031420~alkali metal ion binding                                   | 11 | 2.0715631 | 0.0921060 | 342 | 227 | 12549 | 1.7780740 | 1.0000000 | 0.7966804 | 75.8160769 |
| GOTERM_MF_FAT   | GO:0005328~neurotransmitt                                             | 3  | 0.5649718 | 0.0929640 | 342 | 19  | 12549 | 5.7936288 | 1.0000000 | 0.7906779 | 76.1496653 |

|                 |                                                                                                                  |    |           |           |     |     |       |            |           |           |            |
|-----------------|------------------------------------------------------------------------------------------------------------------|----|-----------|-----------|-----|-----|-------|------------|-----------|-----------|------------|
|                 | er:sodium symporter activity                                                                                     |    |           |           |     |     |       |            |           |           |            |
| GOTERM_CC_FAT   | GO:0044421~extracellular region part                                                                             | 36 | 6.7796610 | 0.0943565 | 364 | 946 | 12337 | 1.2897916  | 1.0000000 | 0.6209444 | 73.7974553 |
| INTERPRO        | IPR012680:Laminin G, subdomain 2                                                                                 | 4  | 0.7532957 | 0.0944094 | 450 | 39  | 16090 | 3.6672365  | 1.0000000 | 0.9579780 | 78.3428413 |
| SP_PIR_KEYWORDS | Tight junction                                                                                                   | 5  | 0.9416196 | 0.0948690 | 529 | 60  | 18289 | 2.8810649  | 1.0000000 | 0.7757814 | 75.3439896 |
| KEGG_PATHWAY    | hsa04940:Type I diabetes mellitus                                                                                | 4  | 0.7532957 | 0.0968310 | 140 | 40  | 5042  | 3.6014286  | 0.9999973 | 0.6001277 | 69.2548577 |
| INTERPRO        | IPR000175:Sodium:neurotransmitter symporter                                                                      | 3  | 0.5649718 | 0.0972801 | 450 | 19  | 16090 | 5.6456140  | 1.0000000 | 0.9571432 | 79.3780564 |
| BIOCARTA        | h_no1Pathway:Actions of Nitric Oxide in the Heart                                                                | 3  | 0.5649718 | 0.0985804 | 43  | 18  | 1406  | 5.4496124  | 0.9998920 | 0.9896059 | 67.5071594 |
| OMIM_DISEASE    | Association of three genetic loci with uric acid concentration and risk of gout: a genome-wide association study | 2  | 0.3766478 | 0.0988047 | 104 | 3   | 3023  | 19.3782051 | 1.0000000 | 0.9999820 | 73.1354474 |
| GOTERM_BP_FAT   | GO:0015837~amine transport                                                                                       | 7  | 1.3182674 | 0.0988615 | 360 | 116 | 13114 | 2.1982280  | 1.0000000 | 0.8632987 | 83.2451802 |
| GOTERM_MF_FAT   | GO:0031402~sodium ion binding                                                                                    | 7  | 1.3182674 | 0.0992555 | 342 | 117 | 12549 | 2.1953066  | 1.0000000 | 0.8041019 | 78.4678568 |
