# Supplementary material
Source: PubMed Central journal article supplement (PMC4076396)
Supplement: supp_113.110403_110403SupTabS3.pdf [file supp_113.110403_110403SupTabS3.pdf]

**Supplemental Table S3.** Clover results indicate the number of chromosomes that returned transcription factor binding motifs as statistically over- or under-represented in HEE DHS overlapping promoters. Analysis was divided into three groups (all DHS, HTE-selective DHS, and ubiquitous DHS).

| All Promoter DHS |                                     |        |        | Epid-selective Promoter DHS |                                                          |        |        | Ubiquitous Promoter DHS |                                     |        |        |
|------------------|-------------------------------------|--------|--------|-----------------------------|----------------------------------------------------------|--------|--------|-------------------------|-------------------------------------|--------|--------|
| Matrix ID        | Gene Symbol                         | p<0.01 | p>0.99 | Matrix ID                   | Gene Symbol                                              | p<0.01 | p>0.99 | Matrix ID               | Gene Symbol                         | p<0.01 | p>0.99 |
| MA0028.1         | ELK1                                | 23     | 0      | V\$AP1_Q6                   | activator protein 1                                      | 14     | 0      | MA0027.1                | En1                                 | 23     | 0      |
| MA0039.2         | Klf4                                | 23     | 0      | V\$FRA1_Q5                  | FRA1                                                     | 13     | 0      | MA0028.1                | ELK1                                | 23     | 0      |
| MA0060.1         | NFYA                                | 23     | 0      | MA0046.1                    | HNF1A                                                    | 7      | 0      | MA0039.2                | Klf4                                | 23     | 0      |
| MA0062.2         | GABPA                               | 23     | 0      | V\$CMF2_Q2                  | C-MAF                                                    | 7      | 0      | MA0060.1                | NFYA                                | 23     | 0      |
| MA0068.1         | Pax4                                | 23     | 0      | V\$NFE2_Q1                  | NF-E2 p45                                                | 7      | 0      | MA0062.2                | GABPA                               | 23     | 0      |
| MA0080.2         | SPI1                                | 23     | 0      | MA0002.2                    | RUNX1                                                    | 5      | 0      | MA0063.1                | Nkx2-5                              | 23     | 0      |
| MA0081.1         | SPIB                                | 23     | 0      | MA0089.1                    | NFE2L1::MafG                                             | 5      | 0      | MA0068.1                | Pax4                                | 23     | 0      |
| MA0084.1         | SRY                                 | 23     | 0      | MA0153.1                    | HNF1B                                                    | 5      | 0      | MA0076.1                | ELK4                                | 23     | 0      |
| MA0098.1         | ETS1                                | 23     | 0      | V\$BACH2_Q1                 | BTB and CNC homolog<br>2                                 | 5      | 0      | MA0080.2                | SPI1                                | 23     | 0      |
| MA0108.2         | TBP                                 | 23     | 0      | MA0080.2                    | SPI1                                                     | 4      | 0      | MA0084.1                | SRY                                 | 23     | 0      |
| MA0136.1         | ELF5                                | 23     | 0      | V\$ETS_Q6                   | Ets                                                      | 4      | 0      | MA0098.1                | ETS1                                | 23     | 0      |
| MA0151.1         | ARID3A                              | 23     | 0      | V\$HNF1_Q1                  | hepatic nuclear factor<br>1                              | 4      | 0      | MA0108.2                | TBP                                 | 23     | 0      |
| MA0156.1         | FEV                                 | 23     | 0      | V\$NERF_Q2                  | new ets-related factor<br>1a                             | 4      | 0      | MA0136.1                | ELF5                                | 23     | 0      |
| V\$ALX3_Q1       | ALX-3                               | 23     | 0      | V\$TEL2_Q6                  | Tel-2                                                    | 4      | 0      | MA0151.1                | ARID3A                              | 23     | 0      |
| V\$ALX4_Q2       | Alx-4<br>myocyte enhancer<br>factor | 23     | 0      | V\$USF_Q6                   | upstream stimulating<br>factor                           | 4      | 0      | MA0158.1                | HOXA5                               | 23     | 0      |
| V\$AMEF2_Q6      | Arx                                 | 23     | 0      | MA0090.1                    | TEAD1                                                    | 3      | 0      | V\$ALX3_Q1              | ALX-3                               | 23     | 0      |
| V\$ARX_Q1        | Arx                                 | 23     | 0      | V\$AP1FJ_Q2                 | activator protein 1<br>BTB and CNC homolog<br>1          | 3      | 0      | V\$ALX4_Q2              | Alx-4<br>myocyte enhancer<br>factor | 23     | 0      |
| V\$BARHL1_Q1     | Barhl-1                             | 23     | 0      | V\$BACH1_Q1                 | BTB and CNC homolog<br>1                                 | 3      | 0      | V\$AMEF2_Q6             | myocyte enhancer<br>factor          | 23     | 0      |
| V\$BARHL2_Q1     | Barhl2                              | 23     | 0      | V\$COREBINDINGFA<br>CTOR_Q6 | core-binding factor                                      | 3      | 0      | V\$AP2_Q6               | activator protein 2                 | 23     | 0      |
| V\$BARX1_Q1      | Barx1                               | 23     | 0      | V\$ELF1_Q5                  | ELF1                                                     | 3      | 0      | V\$ARX_Q1               | Arx                                 | 23     | 0      |
| V\$BARX2_Q1      | Barx-2                              | 23     | 0      | V\$ETS2_Q6                  | ETS2                                                     | 3      | 0      | V\$BARHL1_Q1            | Barhl-1                             | 23     | 0      |
| V\$BCL6_Q1       | BCL6                                | 23     | 0      | V\$HEB_Q6                   | HEB                                                      | 3      | 0      | V\$BARHL2_Q1            | Barhl2                              | 23     | 0      |
| V\$BRN2_Q1       | POU factor Brn-2                    | 23     | 0      | V\$PEBP_Q6                  | PEBP                                                     | 3      | 0      | V\$BARX1_Q1             | Barx1                               | 23     | 0      |
| V\$BRN3C_Q1      | Brn-3c                              | 23     | 0      | V\$STAT6_Q2                 | signal transducer and<br>activator of<br>transcription 6 | 3      | 0      | V\$BARX2_Q1             | Barx-2                              | 23     | 0      |
| V\$BRN4_Q1       | Brn-4                               | 23     | 0      | V\$STAT_Q6                  | STAT                                                     | 3      | 0      | V\$BCL6_Q1              | BCL6                                | 23     | 0      |
| V\$BSX_Q1        | Bsx                                 | 23     | 0      | V\$TCF11_Q1                 | TCF11/KCR-F1/Nrf1<br>homodimers                          | 3      | 0      | V\$BRN2_Q1              | POU factor Brn-2                    | 23     | 0      |
| V\$CART1_Q2      | CART1                               | 23     | 0      | V\$TEF1_Q6                  | TEF-1                                                    | 3      | 0      | V\$BRN3C_Q1             | Brn-3c                              | 23     | 0      |
| V\$CDC5_Q1       | cell division control               | 23     | 0      | V\$TEF_Q1                   | TEF b.s.                                                 | 3      | 0      | V\$BRN4_Q1              | Brn-4                               | 23     | 0      |

|                |                                         |    |   |                 |                                                        |   |   |                  |                                               |    |   |
|----------------|-----------------------------------------|----|---|-----------------|--------------------------------------------------------|---|---|------------------|-----------------------------------------------|----|---|
|                | protein 5                               |    |   |                 |                                                        |   |   |                  |                                               |    |   |
| V\$CDP_03      | CDP                                     | 23 | 0 | V\$ATF5_01      | ATF5 binding site                                      | 3 | 1 | V\$BSX_01        | Bsx                                           | 23 | 0 |
| V\$CDX1_01     | Cdx-1                                   | 23 | 0 | MA0066.1        | PPARG                                                  | 2 | 0 | V\$CART1_02      | CART1                                         | 23 | 0 |
| V\$CDX2_01     | Cdx-2                                   | 23 | 0 | MA0069.1        | Pax6                                                   | 2 | 0 | V\$CDC5_01       | cell division control<br>protein 5            | 23 | 0 |
| V\$CDX_Q5      | Cdx                                     | 23 | 0 | MA0133.1        | BRCA1                                                  | 2 | 0 | V\$CDP_03        | CDP                                           | 23 | 0 |
| V\$CEBP_01     | CCAAT/enhancer<br>binding protein       | 23 | 0 | MA0136.1        | ELF5                                                   | 2 | 0 | V\$CDX1_01       | Cdx-1                                         | 23 | 0 |
| V\$CEBPA_01    | CCAAT/enhancer<br>binding protein alpha | 23 | 0 | MA0138.2        | REST                                                   | 2 | 0 | V\$CDX2_01       | Cdx-2                                         | 23 | 0 |
| V\$CEBPB_01    | CCAAT/enhancer<br>binding protein beta  | 23 | 0 | MA0147.1        | Myc                                                    | 2 | 0 | V\$CDX_Q5        | Cdx                                           | 23 | 0 |
| V\$CETS1P54_02 | c-Ets-1(p54)                            | 23 | 0 | MA0156.1        | FEV                                                    | 2 | 0 | V\$CEBP_01       | CCAAT/enhancer<br>binding protein             | 23 | 0 |
| V\$CKROX_Q2    | CKROX                                   | 23 | 0 | V\$AML1_Q4      | AML1                                                   | 2 | 0 | V\$CEBPA_01      | CCAAT/enhancer<br>binding protein alpha       | 23 | 0 |
| V\$CNOT3_01    | CNOT3                                   | 23 | 0 | V\$AML_Q6       | AML                                                    | 2 | 0 | V\$CEBPGAMMA_Q6  | C/EBPgamma                                    | 23 | 0 |
| V\$CPHX_01     | Cphx                                    | 23 | 0 | V\$AR_Q6        | half-site matrix                                       | 2 | 0 | V\$CETS1P54_02   | c-Ets-1(p54)                                  | 23 | 0 |
| V\$CRX_Q2      | Crx                                     | 23 | 0 | V\$BLIMP1_Q6    | BLIMP1                                                 | 2 | 0 | V\$CKROX_Q2      | CKROX                                         | 23 | 0 |
| V\$DBX1_01     | Dbx-1                                   | 23 | 0 | V\$CEBPDELTA_Q6 | C/EBPdelta                                             | 2 | 0 | V\$CNOT3_01      | CNOT3                                         | 23 | 0 |
| V\$DBX2_01     | Dbx-2                                   | 23 | 0 | V\$CETS1P54_02  | c-Ets-1(p54)                                           | 2 | 0 | V\$CPHX_01       | Cphx                                          | 23 | 0 |
| V\$DLX1_01     | Dlx-1                                   | 23 | 0 | V\$DR1_Q3       | Direct repeat 1                                        | 2 | 0 | V\$CREB_01       | cAMP-responsive<br>element binding<br>protein | 23 | 0 |
| V\$DLX2_01     | Dlx-2                                   | 23 | 0 | V\$ELK1_01      | Elk-1                                                  | 2 | 0 | V\$CREBP1CJUN_01 | CRE-binding protein<br>1:c-Jun heterodimer    | 23 | 0 |
| V\$DLX3_01     | dlx3                                    | 23 | 0 | V\$ESE1_Q3      | ESE1                                                   | 2 | 0 | V\$CRX_Q2        | Crx                                           | 23 | 0 |
| V\$DLX5_01     | dlx5                                    | 23 | 0 | V\$FLI1_Q6      | FLI1                                                   | 2 | 0 | V\$DBX1_01       | Dbx-1                                         | 23 | 0 |
| V\$DLX7_01     | Dlx7                                    | 23 | 0 | V\$GATA_Q6      | GATA                                                   | 2 | 0 | V\$DBX2_01       | Dbx-2                                         | 23 | 0 |
| V\$DOBOX4_01   | Dobox4                                  | 23 | 0 | V\$IPF1_02      | A1                                                     | 2 | 0 | V\$DLX1_01       | Dlx-1                                         | 23 | 0 |
| V\$DOBOX5_01   | Dobox5                                  | 23 | 0 | V\$LMAF_Q2      | LMAF                                                   | 2 | 0 | V\$DLX2_01       | Dlx-2                                         | 23 | 0 |
| V\$DRI1_01     | DRI1 b.s.                               | 23 | 0 | V\$MAFB_01      | MAFB                                                   | 2 | 0 | V\$DLX3_01       | dlx3                                          | 23 | 0 |
| V\$DUXL_01     | Duxl                                    | 23 | 0 | V\$MATH1_Q2     | E47:MATH1<br>myoblast<br>determination gene<br>product | 2 | 0 | V\$DLX5_01       | dlx5                                          | 23 | 0 |
| V\$E2F1_01     | E2F1                                    | 23 | 0 | V\$MYOD_01      | nuclear respiratory<br>factor 2                        | 2 | 0 | V\$DLX7_01       | Dlx7                                          | 23 | 0 |
| V\$E2F6_01     | E2F6                                    | 23 | 0 | V\$NRF2_01      |                                                        | 2 | 0 | V\$DOBOX4_01     | Dobox4                                        | 23 | 0 |
| V\$E2F_Q2      | E2F                                     | 23 | 0 | V\$OCT1_Q5_01   | 1-Oct                                                  | 2 | 0 | V\$DOBOX5_01     | Dobox5                                        | 23 | 0 |
| V\$ELF1_Q5     | ELF1                                    | 23 | 0 | V\$PAX_Q6       | Pax<br>PPAR:RXR<br>heterodimers                        | 2 | 0 | V\$DRI1_01       | DRI1 b.s.                                     | 23 | 0 |
| V\$EMX2_01     | EMX2                                    | 23 | 0 | V\$PPARA_01     |                                                        | 2 | 0 | V\$DUXL_01       | Duxl                                          | 23 | 0 |
| V\$EN1_02      | En-1                                    | 23 | 0 | V\$PU1_Q4       | PU.1                                                   | 2 | 0 | V\$E2F1_01       | E2F1                                          | 23 | 0 |
| V\$EN2_01      | En-2                                    | 23 | 0 | V\$RORA_Q4      | RORalpha                                               | 2 | 0 | V\$E2F1DP1_01    | E2F-1:DP-1<br>heterodimer                     | 23 | 0 |

|                 |                                                    |    |   |                |                                                   |   |   |                 |                                                    |    |   |
|-----------------|----------------------------------------------------|----|---|----------------|---------------------------------------------------|---|---|-----------------|----------------------------------------------------|----|---|
| V\$ERG_01       | ERG                                                | 23 | 0 | V\$SMAD4_Q6    | SMAD4                                             | 2 | 0 | V\$E2F6_01      | E2F6                                               | 23 | 0 |
| V\$ESX1_01      | Esx1                                               | 23 | 0 | V\$SRF_Q4      | SRF                                               | 2 | 0 | V\$E2F_Q2       | E2F                                                | 23 | 0 |
| V\$ETF_Q6       | ETF                                                | 23 | 0 | V\$TR4_01      | TR4                                               | 2 | 0 | V\$ELF1_Q5      | ELF1                                               | 23 | 0 |
| V\$ETS_Q4       | Ets                                                | 23 | 0 | V\$ZABC1_01    | ZABC1 b.s.                                        | 2 | 0 | V\$EMX2_01      | EMX2                                               | 23 | 0 |
| V\$EVX1_01      | Evx-1                                              | 23 | 0 | MA0078.1       | Sox17                                             | 2 | 1 | V\$EN2_01       | En-2                                               | 23 | 0 |
| V\$EVX2_01      | Evx2                                               | 23 | 0 | MA0104.2       | Mycn                                              | 2 | 1 | V\$ERG_01       | ERG                                                | 23 | 0 |
| V\$FLI1_Q6      | FLI1                                               | 23 | 0 | V\$COUP_DR1_Q6 | COUP direct repeat 1                              | 2 | 1 | V\$ESX1_01      | Esx1                                               | 23 | 0 |
| V\$FOXO4_02     | fork head box O4                                   | 23 | 0 | V\$E47_01      | E47                                               | 2 | 1 | V\$ETF_Q6       | ETF                                                | 23 | 0 |
| V\$FOXP3_01     | forkhead box P3                                    | 23 | 0 | MA0007.1       | Ar                                                | 1 | 0 | V\$EVX1_01      | Evx-1                                              | 23 | 0 |
| V\$GABP_B       | GA binding protein                                 | 23 | 0 | MA0014.1       | Pax5                                              | 1 | 0 | V\$EVX2_01      | Evx2                                               | 23 | 0 |
| V\$GABPALPHA_Q4 | GABP-alpha<br>Growth-associated<br>binding protein | 23 | 0 | MA0043.1       | HLF                                               | 1 | 0 | V\$FOXO3_01     | fork head box O3                                   | 23 | 0 |
| V\$GADP_01      | GADP                                               | 23 | 0 | MA0048.1       | NHLH1                                             | 1 | 0 | V\$FOXO4_01     | fork head box O4                                   | 23 | 0 |
| V\$GBX1_01      | Gbx1                                               | 23 | 0 | MA0055.1       | Myf                                               | 1 | 0 | V\$FOXP3_01     | forkhead box P3                                    | 23 | 0 |
| V\$GBX2_01      | Gbx2                                               | 23 | 0 | MA0056.1       | MZF1_1-4                                          | 1 | 0 | V\$GABP_B       | GA binding protein                                 | 23 | 0 |
| V\$GSC_01       | Gsc                                                | 23 | 0 | MA0060.1       | NFYA                                              | 1 | 0 | V\$GABPALPHA_Q4 | GABP-alpha<br>Growth-associated<br>binding protein | 23 | 0 |
| V\$GSH2_01      | GSH2                                               | 23 | 0 | MA0091.1       | TAL1::TCF3                                        | 1 | 0 | V\$GADP_01      | GADP                                               | 23 | 0 |
| V\$HB24_01      | HB24                                               | 23 | 0 | MA0101.1       | REL                                               | 1 | 0 | V\$GBX1_01      | Gbx1                                               | 23 | 0 |
| V\$HB9_01       | HB9                                                | 23 | 0 | MA0102.2       | CEBPA                                             | 1 | 0 | V\$GBX2_01      | Gbx2                                               | 23 | 0 |
| V\$HDX_01       | Hdx                                                | 23 | 0 | MA0106.1       | TP53                                              | 1 | 0 | V\$GKLF_02      | GKLF (KLF4)                                        | 23 | 0 |
| V\$HELIOSA_02   | Helios A                                           | 23 | 0 | MA0107.1       | RELA                                              | 1 | 0 | V\$GSC_01       | Gsc                                                | 23 | 0 |
| V\$HMBOX1_01    | Hmbox1                                             | 23 | 0 | MA0112.2       | ESR1                                              | 1 | 0 | V\$GSH2_01      | GSH2                                               | 23 | 0 |
| V\$HMGY1_01     | HMGY1                                              | 23 | 0 | MA0132.1       | Pdx1                                              | 1 | 0 | V\$HB24_01      | HB24                                               | 23 | 0 |
| V\$HMX1_02      | HMX1                                               | 23 | 0 | MA0137.2       | STAT1                                             | 1 | 0 | V\$HB9_01       | HB9                                                | 23 | 0 |
| V\$HMX3_02      | Nkx5-1<br>hepatic nuclear factor<br>1              | 23 | 0 | MA0144.1       | Stat3                                             | 1 | 0 | V\$HDX_01       | Hdx                                                | 23 | 0 |
| V\$HNF1_01      | HNF-1beta                                          | 23 | 0 | MA0152.1       | NFATC2                                            | 1 | 0 | V\$HELIOSA_02   | Helios A                                           | 23 | 0 |
| V\$HNF1B_01     | HNF-1beta                                          | 23 | 0 | MA0157.1       | FOXO3                                             | 1 | 0 | V\$HMBOX1_01    | Hmbox1                                             | 23 | 0 |
| V\$HOMEZ_01     | Homez                                              | 23 | 0 | MA0159.1       | RXR::RAR_DR5                                      | 1 | 0 | V\$HMGY1_01     | HMGY1                                              | 23 | 0 |
| V\$HOXA13_02    | HOXA5                                              | 23 | 0 | MA0161.1       | NFIC                                              | 1 | 0 | V\$HMX1_02      | HMX1                                               | 23 | 0 |
| V\$HOXA10_01    | HOXA10                                             | 23 | 0 | MA0163.1       | PLAG1                                             | 1 | 0 | V\$HMX3_02      | Nkx5-1<br>hepatic nuclear factor<br>1              | 23 | 0 |
| V\$HOXA11_01    | HOXA11                                             | 23 | 0 | MA0258.1       | ESR2                                              | 1 | 0 | V\$HNF1_01      | HNF-1beta                                          | 23 | 0 |
| V\$HOXA13_02    | HOXA13                                             | 23 | 0 | MA0442.1       | SOX10                                             | 1 | 0 | V\$HNF1B_01     | HNF-1beta                                          | 23 | 0 |
| V\$HOXA1_01     | HOXA1                                              | 23 | 0 | V\$AHRARNT_01  | aryl hydrocarbon<br>receptor:Arnt<br>heterodimers | 1 | 0 | V\$HOMEZ_01     | Homez                                              | 23 | 0 |
| V\$HOXA2_01     | HoxA2                                              | 23 | 0 | V\$ALX4_01     | Alx-4                                             | 1 | 0 | V\$HOXA13_02    | HOXA5                                              | 23 | 0 |
| V\$HOXA3_02     | HOXA3                                              | 23 | 0 | V\$AML2_01     | AML2                                              | 1 | 0 | V\$HOXA10_01    | HOXA10                                             | 23 | 0 |
| V\$HOXA4_01     | HOXA4                                              | 23 | 0 | V\$AP4_Q6      | activator protein 4                               | 1 | 0 | V\$HOXA11_01    | HOXA11                                             | 23 | 0 |

|              |                                     |    |   |                  |                                                   |   |   |              |                                  |    |   |
|--------------|-------------------------------------|----|---|------------------|---------------------------------------------------|---|---|--------------|----------------------------------|----|---|
| V\$HOXA6_01  | HOXA6                               | 23 | 0 | V\$ATF6_01       | activating transcription factor 6                 | 1 | 0 | V\$HOXA13_02 | HOXA13                           | 23 | 0 |
| V\$HOXA7_02  | HOXA7                               | 23 | 0 | V\$ATF_01        | activating transcription factor                   | 1 | 0 | V\$HOXA1_01  | HOXA1                            | 23 | 0 |
| V\$HOXA9_01  | hoxa9                               | 23 | 0 | V\$CACCCBINDINGF |                                                   |   |   | V\$HOXA2_01  | HoxA2                            | 23 | 0 |
| V\$HOXB13_01 | HOXB13                              | 23 | 0 | ACTOR_Q6         | CACCC-binding factor cut-like homeodomain protein | 1 | 0 | V\$HOXA3_01  | HOXA3 (homeobox cluster protein) | 23 | 0 |
| V\$HOXB3_01  | HOXB3                               | 23 | 0 | V\$CDP_01        | cut-like homeodomain protein                      | 1 | 0 | V\$HOXA4_01  | HOXA4                            | 23 | 0 |
| V\$HOXB4_01  | HOXB4                               | 23 | 0 | V\$CDPCR3HD_01   | CCAAT/enhancer binding protein                    | 1 | 0 | V\$HOXA6_01  | HOXA6                            | 23 | 0 |
| V\$HOXB5_01  | HoxB5                               | 23 | 0 | V\$CEBP_01       | CCAAT/enhancer binding protein beta               | 1 | 0 | V\$HOXA7_02  | HOXA7                            | 23 | 0 |
| V\$HOXB6_01  | HOXB6                               | 23 | 0 | V\$CEBPB_01      | binding protein beta                              | 1 | 0 | V\$HOXA9_01  | hoxa9                            | 23 | 0 |
| V\$HOXB7_01  | HOXB7                               | 23 | 0 | V\$CEBPE_01      | cebpe                                             | 1 | 0 | V\$HOXB13_01 | HOXB13                           | 23 | 0 |
| V\$HOXB8_01  | HOXB8                               | 23 | 0 | V\$CHOP_01       | heterodimers of CHOP and C/EBPalpha               | 1 | 0 | V\$HOXB3_01  | HOXB3                            | 23 | 0 |
| V\$HOXB9_01  | HOXB9                               | 23 | 0 | V\$CMYC_02       | c-Myc heterodimer (with a 26-29 kDa factor)       | 1 | 0 | V\$HOXB4_01  | HOXB4                            | 23 | 0 |
| V\$HOXC10_01 | HOXC10                              | 23 | 0 | V\$CP2_01        | CP2                                               | 1 | 0 | V\$HOXB5_01  | HoxB5                            | 23 | 0 |
| V\$HOXC11_01 | HOXC11                              | 23 | 0 | V\$CREB_01       | cAMP-responsive element binding protein           | 1 | 0 | V\$HOXB6_01  | HOXB6                            | 23 | 0 |
| V\$HOXC12_01 | HOXC12                              | 23 | 0 | V\$CREBP1_Q2     | CRE-binding protein 1                             | 1 | 0 | V\$HOXB7_01  | HOXB7                            | 23 | 0 |
| V\$HOXC13_01 | HOXC13                              | 23 | 0 | V\$CREL_01       | c-Rel                                             | 1 | 0 | V\$HOXB8_01  | HOXB8                            | 23 | 0 |
| V\$HOXC4_01  | HOXC4                               | 23 | 0 | V\$CTCF_02       | CCCTC-binding factor                              | 1 | 0 | V\$HOXB9_01  | HOXB9                            | 23 | 0 |
| V\$HOXC5_01  | HOXC5                               | 23 | 0 | V\$DAX1_01       | Dax1                                              | 1 | 0 | V\$HOXC10_01 | HOXC10                           | 23 | 0 |
| V\$HOXC6_01  | HOXC6                               | 23 | 0 | V\$E2A_Q6        | E2A                                               | 1 | 0 | V\$HOXC11_01 | HOXC11                           | 23 | 0 |
| V\$HOXC8_01  | HOXC-8                              | 23 | 0 | V\$E2F_Q6_01     | E2F                                               | 1 | 0 | V\$HOXC12_01 | HOXC12                           | 23 | 0 |
| V\$HOXC9_01  | HOXC9                               | 23 | 0 | V\$EBF_Q6        | EBF                                               | 1 | 0 | V\$HOXC13_01 | HOXC13                           | 23 | 0 |
| V\$HOXD10_01 | HOXD10                              | 23 | 0 | V\$ETS1_B        | c-ETS-1 binding site                              | 1 | 0 | V\$HOXC4_01  | HOXC4                            | 23 | 0 |
| V\$HOXD11_01 | HOXD11                              | 23 | 0 | V\$FXR_IR1_Q6    | FXR inverted repeat 1                             | 1 | 0 | V\$HOXC5_01  | HOXC5                            | 23 | 0 |
| V\$HOXD12_01 | HOXD12                              | 23 | 0 | V\$GABPALPHA_Q4  | GABP-alpha                                        | 1 | 0 | V\$HOXC6_01  | HOXC6                            | 23 | 0 |
| V\$HOXD13_01 | HOXD13                              | 23 | 0 | V\$GADP_01       | Growth-associated binding protein                 | 1 | 0 | V\$HOXC8_01  | HOXC-8                           | 23 | 0 |
| V\$HOXD1_01  | HOXD1                               | 23 | 0 | V\$GAF_Q6        | GAF                                               | 1 | 0 | V\$HOXC9_01  | HOXC9                            | 23 | 0 |
| V\$HOXD3_01  | HOXD3                               | 23 | 0 | V\$HELIOSA_02    | Helios A                                          | 1 | 0 | V\$HOXD10_01 | HOXD10                           | 23 | 0 |
| V\$HOXD8_01  | HOXD8                               | 23 | 0 | V\$HIF2A_01      | HIF-2alpha                                        | 1 | 0 | V\$HOXD11_01 | HOXD11                           | 23 | 0 |
| V\$IPF1_05   | homeobox transcription factor Pdx-1 | 23 | 0 | V\$HMX1_01       | H6 homeobox 3                                     | 1 | 0 | V\$HOXD12_01 | HOXD12                           | 23 | 0 |
| V\$IRF3_Q3   | IRF3                                | 23 | 0 | V\$HNF4_01_B     | Hepatocyte nuclear factor 4                       | 1 | 0 | V\$HOXD13_01 | HOXD13                           | 23 | 0 |
| V\$IRF_Q6    | IRF                                 | 23 | 0 | V\$IRF3_Q3       | IRF3                                              | 1 | 0 | V\$HOXD1_01  | HOXD1                            | 23 | 0 |
|              |                                     |    |   | V\$IRF7_01       | interferon regulatory factor 7                    | 1 | 0 |              |                                  |    |   |

|               |                                               |    |   |                  |                                                                                                                   |   |   |               |                                           |    |   |
|---------------|-----------------------------------------------|----|---|------------------|-------------------------------------------------------------------------------------------------------------------|---|---|---------------|-------------------------------------------|----|---|
| V\$IRX2_01    | Irx2                                          | 23 | 0 | V\$IRF_Q6        | IRF                                                                                                               | 1 | 0 | V\$HOXD3_01   | HOXD3                                     | 23 | 0 |
| V\$IRX3_01    | Irx-3                                         | 23 | 0 | V\$KAISO_01      | KAISO                                                                                                             | 1 | 0 | V\$HOXD8_01   | HOXD8<br>homeobox<br>transcription factor | 23 | 0 |
| V\$IRX4_01    | IRX4                                          | 23 | 0 | V\$LEF1_Q2       | LEF1                                                                                                              | 1 | 0 | V\$IPF1_05    | Pdx-1                                     | 23 | 0 |
| V\$IRX5_01    | Irx5                                          | 23 | 0 | V\$LEF1TCF1_Q4   | LEF1, TCF1<br>complex of Lmo2<br>bound to Tal-1, E2A<br>proteins, and GATA-1,<br>half-site 1                      | 1 | 0 | V\$IRF3_Q3    | IRF3                                      | 23 | 0 |
| V\$IRXB3_01   | IRXB3                                         | 23 | 0 | V\$LMO2COM_01    | half-site 1                                                                                                       | 1 | 0 | V\$IRF7_01    | interferon regulatory<br>factor 7         | 23 | 0 |
| V\$ISL2_01    | Isl2                                          | 23 | 0 | V\$LTF_Q6        | LTF                                                                                                               | 1 | 0 | V\$IRF_Q6     | IRF                                       | 23 | 0 |
| V\$ISX_01     | isx                                           | 23 | 0 | V\$MAF_Q6        | MAF                                                                                                               | 1 | 0 | V\$IRX2_01    | Irx2                                      | 23 | 0 |
| V\$K2B_01     | K-2b                                          | 23 | 0 | V\$MAFA_Q4_01    | MAFA                                                                                                              | 1 | 0 | V\$IRX3_01    | Irx-3                                     | 23 | 0 |
| V\$KROX_Q6    | KROX                                          | 23 | 0 | V\$MAZ_Q6        | MAZ<br>MIBP-1 / RFX1<br>complex                                                                                   | 1 | 0 | V\$IRX4_01    | IRX4                                      | 23 | 0 |
| V\$Lbx2_01    | Lbx2                                          | 23 | 0 | V\$MIF1_01       | complex                                                                                                           | 1 | 0 | V\$IRX5_01    | Irx5                                      | 23 | 0 |
| V\$LH2_01     | LH-2                                          | 23 | 0 | V\$MYOGENIN_Q6   | myogenin<br>myogenin / nuclear<br>factor 1 or related<br>factors                                                  | 1 | 0 | V\$IRXB3_01   | IRXB3                                     | 23 | 0 |
| V\$LHX3_02    | Lhx3                                          | 23 | 0 | V\$MYOGNF1_01    | factors                                                                                                           | 1 | 0 | V\$ISL2_01    | Isl2                                      | 23 | 0 |
| V\$LHX4_01    | Lhx4                                          | 23 | 0 | V\$NEUROD_01     | Neuro D                                                                                                           | 1 | 0 | V\$ISX_01     | isx                                       | 23 | 0 |
| V\$LHX5_01    | Lhx5                                          | 23 | 0 | V\$NF1_Q6        | nuclear factor 1                                                                                                  | 1 | 0 | V\$K2B_01     | K-2b                                      | 23 | 0 |
| V\$LHX61_01   | lhx6.1                                        | 23 | 0 | V\$NFAT1_Q6      | NFAT1                                                                                                             | 1 | 0 | V\$KROX_Q6    | KROX                                      | 23 | 0 |
| V\$LHX8_01    | Lhx8                                          | 23 | 0 | V\$NFAT2_01      | NF-AT2                                                                                                            | 1 | 0 | V\$Lbx2_01    | Lbx2                                      | 23 | 0 |
| V\$LHX9_01    | Lhx9                                          | 23 | 0 | V\$NFAT_Q4_01    | NF-AT                                                                                                             | 1 | 0 | V\$LH2_01     | LH-2                                      | 23 | 0 |
| V\$Lim1_01    | Lim-1                                         | 23 | 0 | V\$NFKAPPAB50_01 | NF-kappaB (p50)                                                                                                   | 1 | 0 | V\$LHX3_02    | Lhx3                                      | 23 | 0 |
| V\$LMX1_01    | Lmx-1                                         | 23 | 0 | V\$NFKAPPAB65_01 | NF-kappaB (p65)                                                                                                   | 1 | 0 | V\$LHX4_01    | Lhx4                                      | 23 | 0 |
| V\$LMX1B_01   | lmx1b                                         | 23 | 0 | V\$NFKAPPAB_01   | NF-kappaB<br>nuclear factor Y (Y-<br>box binding factor)<br>homeo domain factor<br>Nkx-2.5/Csx, tinman<br>homolog | 1 | 0 | V\$LHX5_01    | Lhx5                                      | 23 | 0 |
| V\$MAZ_Q6     | MAZ                                           | 23 | 0 | V\$NFY_01        | nuclear factor Y (Y-<br>box binding factor)<br>homeo domain factor<br>Nkx-2.5/Csx, tinman<br>homolog              | 1 | 0 | V\$LHX61_01   | lhx6.1                                    | 23 | 0 |
| V\$MEF2_Q6_01 | MEF-2                                         | 23 | 0 | V\$NKX25_02      | homolog                                                                                                           | 1 | 0 | V\$LHX8_01    | Lhx8                                      | 23 | 0 |
| V\$MEIS1_02   | Meis1                                         | 23 | 0 | V\$NMYC_01       | N-Myc                                                                                                             | 1 | 0 | V\$LHX9_01    | Lhx9                                      | 23 | 0 |
| V\$MEIS2_01   | Meis2<br>myocyte enhancer<br>factor           | 23 | 0 | V\$NRSE_B        | neural-restrictive-<br>silencer-element                                                                           | 1 | 0 | V\$Lim1_01    | Lim-1                                     | 23 | 0 |
| V\$MMEF2_Q6   | factor                                        | 23 | 0 | V\$NRSF_Q4       | NRSF                                                                                                              | 1 | 0 | V\$LMX1_01    | Lmx-1                                     | 23 | 0 |
| V\$MOX1_01    | Mox1                                          | 23 | 0 | V\$OCT4_01       | Sox2-Oct4 joint motif,<br>in silico predicted                                                                     | 1 | 0 | V\$LMX1B_01   | lmx1b                                     | 23 | 0 |
| V\$MRG2_01    | MRG2<br>msh-like (muscle<br>segment homeobox) | 23 | 0 | V\$OCT_C         | Octamer binding site                                                                                              | 1 | 0 | V\$MAZ_Q6     | MAZ                                       | 23 | 0 |
| V\$MSX1_01    | homeobox protein 1                            | 23 | 0 | V\$OSF2_Q6       | Osf2                                                                                                              | 1 | 0 | V\$MEF2_Q6_01 | MEF-2                                     | 23 | 0 |
| V\$MSX2_01    | Msx-2                                         | 23 | 0 | V\$P300_01       | p300                                                                                                              | 1 | 0 | V\$MEIS1_02   | Meis1                                     | 23 | 0 |

|             |                                                                             |    |   |                     |                                                     |   |   |             |                                                                             |    |   |
|-------------|-----------------------------------------------------------------------------|----|---|---------------------|-----------------------------------------------------|---|---|-------------|-----------------------------------------------------------------------------|----|---|
| V\$MSX3_01  | Msx-3                                                                       | 23 | 0 | V\$P50RELAP65_Q5_01 | P50:RELA-P65                                        | 1 | 0 | V\$MEIS2_01 | Meis2                                                                       | 23 | 0 |
| V\$NCX_02   | Ncx                                                                         | 23 | 0 | V\$P53_01           | tumor suppressor p53                                | 1 | 0 | V\$MMEF2_Q6 | myocyte enhancer factor                                                     | 23 | 0 |
| V\$NFAT1_Q6 | NFAT1                                                                       | 23 | 0 | V\$P63_01           | p63                                                 | 1 | 0 | V\$MOX1_01  | Mox1                                                                        | 23 | 0 |
| V\$NFAT2_Q5 | NF-AT2                                                                      | 23 | 0 | V\$PBX1_02          | homeo domain factor Pbx-1                           | 1 | 0 | V\$MRG2_01  | MRG2                                                                        | 23 | 0 |
| V\$NFAT3_Q3 | NFAT3                                                                       | 23 | 0 | V\$PEA3_Q6          | PEA3                                                | 1 | 0 | V\$MSX1_01  | msh-like (muscle segment homeobox) homeobox protein 1                       | 23 | 0 |
| V\$NFAT_Q6  | Nuclear factor of activated T-cells nuclear factor Y (Y-box binding factor) | 23 | 0 | V\$PNR_01           | PNR                                                 | 1 | 0 | V\$MSX2_01  | Msx-2                                                                       | 23 | 0 |
| V\$NFY_01   |                                                                             | 23 | 0 | V\$POU5F1_01        | POU5F1 b.s.                                         | 1 | 0 | V\$MSX3_01  | Msx-3                                                                       | 23 | 0 |
| V\$NKX11_01 | Nkx1-1                                                                      | 23 | 0 | V\$PPAR_DR1_Q2      | PPAR direct repeat 1                                | 1 | 0 | V\$NCX_01   | Ncx                                                                         | 23 | 0 |
| V\$NKX12_01 | Nkx1-2                                                                      | 23 | 0 | V\$PTF1BETA_Q6      | PTF1-beta                                           | 1 | 0 | V\$NFAT3_Q3 | NFAT3                                                                       | 23 | 0 |
| V\$NKX21_01 | Nkx2-1                                                                      | 23 | 0 | V\$PXR_Q2           | half-site matrix                                    | 1 | 0 | V\$NFAT_Q6  | Nuclear factor of activated T-cells nuclear factor Y (Y-box binding factor) | 23 | 0 |
| V\$NKX22_02 | NKX22                                                                       | 23 | 0 | V\$RELBP52_01       | kappaB site                                         | 1 | 0 | V\$NFY_01   |                                                                             | 23 | 0 |
| V\$NKX23_01 | Nkx2-3                                                                      | 23 | 0 | V\$REX1_02          | REX1                                                | 1 | 0 | V\$NKX11_01 | Nkx1-1                                                                      | 23 | 0 |
| V\$NKX24_01 | Nkx2-4                                                                      | 23 | 0 | V\$RFX1_01          | X-box binding protein RFX1                          | 1 | 0 | V\$NKX12_01 | Nkx1-2                                                                      | 23 | 0 |
| V\$NKX25_03 | NKX25                                                                       | 23 | 0 | V\$RFX3_01          | RFX3 dimer                                          | 1 | 0 | V\$NKX21_01 | Nkx2-1                                                                      | 23 | 0 |
| V\$NKX26_01 | Nkx2-6                                                                      | 23 | 0 | V\$RFX_Q6           | RFX                                                 | 1 | 0 | V\$NKX22_02 | NKX22                                                                       | 23 | 0 |
| V\$NKX29_01 | Nkx2-9                                                                      | 23 | 0 | V\$ROAZ_01          | rat Olf-1/EBF-associated zinc finger protein        | 1 | 0 | V\$NKX23_01 | Nkx2-3                                                                      | 23 | 0 |
| V\$NKX32_02 | Nkx3-2                                                                      | 23 | 0 | V\$RORBETA_Q2       | RORBETA                                             | 1 | 0 | V\$NKX24_01 | Nkx2-4                                                                      | 23 | 0 |
| V\$NKX3A_02 | Nkx3A                                                                       | 23 | 0 | V\$SF1_Q6           | SF1                                                 | 1 | 0 | V\$NKX25_02 | homeo domain factor Nkx-2.5/Csx, tinman homolog                             | 23 | 0 |
| V\$NKX52_01 | Nkx5-2                                                                      | 23 | 0 | V\$SMAD3_Q6         | SMAD3                                               | 1 | 0 | V\$NKX26_01 | Nkx2-6                                                                      | 23 | 0 |
| V\$NKX61_02 | NKX6.1                                                                      | 23 | 0 | V\$SOX_01           | SOX                                                 | 1 | 0 | V\$NKX29_01 | Nkx2-9                                                                      | 23 | 0 |
| V\$NKX62_Q2 | NK related homeobox factor 6-2                                              | 23 | 0 | V\$SP3_Q3           | Sp3                                                 | 1 | 0 | V\$NKX32_02 | Nkx3-2                                                                      | 23 | 0 |
| V\$NKX63_01 | Nkx6-3                                                                      | 23 | 0 | V\$SPIB_01          | SPI-B                                               | 1 | 0 | V\$NKX3A_02 | Nkx3A                                                                       | 23 | 0 |
| V\$NRF2_01  | nuclear respiratory factor 2                                                | 23 | 0 | V\$STAT4_01         | signal transducer and activator of transcription 4  | 1 | 0 | V\$NKX52_01 | Nkx5-2                                                                      | 23 | 0 |
| V\$OBOX1_01 | Obox1                                                                       | 23 | 0 | V\$STAT5A_01        | signal transducer and activator of transcription 5a | 1 | 0 | V\$NKX61_01 | NKX6-1                                                                      | 23 | 0 |
| V\$OBOX2_01 | Obox2                                                                       | 23 | 0 | V\$STAT5B_01        | signal transducer and activator of transcription 5b | 1 | 0 | V\$NKX62_Q2 | NK related homeobox factor 6-2                                              | 23 | 0 |
| V\$OBOX3_01 | Obox3                                                                       | 23 | 0 | V\$STRA13_01        | Stra13                                              | 1 | 0 | V\$NKX63_01 | Nkx6-3                                                                      | 23 | 0 |
| V\$OBOX5_01 | Obox5                                                                       | 23 | 0 | V\$TAL1_01          | Tal-1 (Scf)                                         | 1 | 0 | V\$NRF1_Q6  | nuclear respiratory                                                         | 23 | 0 |

|               |                                     |    |   |                 |                                                          |   |   |               |                                             |    |   |
|---------------|-------------------------------------|----|---|-----------------|----------------------------------------------------------|---|---|---------------|---------------------------------------------|----|---|
| V\$OBOX6_01   | Obox6                               | 23 | 0 | V\$TCF4_03      | Tcf-4 dimer                                              | 1 | 0 | V\$NRF2_01    | factor 1<br>nuclear respiratory<br>factor 2 | 23 | 0 |
| V\$OCT1_03    | octamer factor 1                    | 23 | 0 | V\$TTF1_Q6      | TTF-1 (Nkx2-1)                                           | 1 | 0 | V\$OBOX1_01   | Obox1                                       | 23 | 0 |
| V\$OCT2_01    | 2-Oct                               | 23 | 0 | V\$UF1H3BETA_Q6 | UF1H3BETA<br>winged-helix factor<br>nude                 | 1 | 0 | V\$OBOX2_01   | Obox2                                       | 23 | 0 |
| V\$OCT_Q6     | Octamer                             | 23 | 0 | V\$WHN_B        | X-box-binding protein<br>1                               | 1 | 0 | V\$OBOX3_01   | Obox3                                       | 23 | 0 |
| V\$OCTAMER_01 | Octamer                             | 23 | 0 | V\$XBP1_01      | 1                                                        | 1 | 0 | V\$OBOX5_01   | Obox5                                       | 23 | 0 |
| V\$OG2_02     | OG-2                                | 23 | 0 | V\$ZFP281_01    | Zfp281                                                   | 1 | 0 | V\$OBOX6_01   | Obox6                                       | 23 | 0 |
| V\$OTP_01     | OTP                                 | 23 | 0 | MA0003.1        | TFAP2A                                                   | 1 | 1 | V\$OCT1_03    | octamer factor 1                            | 23 | 0 |
| V\$OTX1_01    | Otx1                                | 23 | 0 | MA0004.1        | Arnt                                                     | 1 | 1 | V\$OCT2_01    | 2-Oct                                       | 23 | 0 |
| V\$OTX2_01    | Otx2                                | 23 | 0 | MA0116.1        | Zfp423                                                   | 1 | 1 | V\$OCT_Q6     | Octamer                                     | 23 | 0 |
| V\$OTX3_01    | Otx3                                | 23 | 0 | MA0149.1        | EWSR1-FLI1                                               | 1 | 1 | V\$OCTAMER_01 | Octamer                                     | 23 | 0 |
| V\$P53_03     | tumor suppressor p53                | 23 | 0 | V\$AP2ALPHA_01  | AP-2alpha                                                | 1 | 1 | V\$OG2_02     | OG-2                                        | 23 | 0 |
| V\$PARP_Q3    | PARP                                | 23 | 0 | V\$BRACH_01     | Brachyury<br>CIZ (Cas-associated<br>zinc finger protein) | 1 | 1 | V\$OTP_01     | OTP                                         | 23 | 0 |
| V\$PAX2_01    | Pax-2                               | 23 | 0 | V\$CIZ_01       | 1                                                        | 1 | 1 | V\$OTX1_01    | Otx1                                        | 23 | 0 |
| V\$PAX6_02    | pax6                                | 23 | 0 | V\$CKROX_Q2     | CKROX                                                    | 1 | 1 | V\$OTX2_01    | Otx2                                        | 23 | 0 |
| V\$PAX7_01    | Pax-7                               | 23 | 0 | V\$CREBATF_Q6   | CREB, ATF                                                | 1 | 1 | V\$OTX3_01    | Otx3                                        | 23 | 0 |
| V\$PAX8_01    | Pax-8 binding sites                 | 23 | 0 | V\$DMRT4_01     | DMRT4                                                    | 1 | 1 | V\$OTX_Q1     | OTX                                         | 23 | 0 |
| V\$PBX1_01    | Pbx-1                               | 23 | 0 | V\$E2F1_Q4_01   | E2F-1                                                    | 1 | 1 | V\$P53_03     | tumor suppressor p53                        | 23 | 0 |
| V\$PEA3_Q6    | PEA3                                | 23 | 0 | V\$GABP_B       | GA binding protein                                       | 1 | 1 | V\$PARP_Q3    | PARP                                        | 23 | 0 |
| V\$PIT1_01    | Pit-1                               | 23 | 0 | V\$HTF_01       | HTF<br>myogenic MADS factor                              | 1 | 1 | V\$PAX2_01    | Pax-2                                       | 23 | 0 |
| V\$PITX1_01   | Pitx1                               | 23 | 0 | V\$MEF2_03      | MEF-2                                                    | 1 | 1 | V\$PAX6_02    | pax6                                        | 23 | 0 |
| V\$PITX2_01   | PITX2                               | 23 | 0 | V\$NFAT3_Q3     | NFAT3                                                    | 1 | 1 | V\$PAX7_01    | Pax-7                                       | 23 | 0 |
| V\$PKNOX2_01  | PKNOX2                              | 23 | 0 | V\$SOX9_Q4      | SOX9                                                     | 1 | 1 | V\$PAX8_01    | Pax-8 binding sites                         | 23 | 0 |
| V\$PMX2A_01   | PMX2A                               | 23 | 0 | V\$CNOT3_01     | CNOT3                                                    | 1 | 2 | V\$PBX1_01    | Pbx-1                                       | 23 | 0 |
| V\$PMX2B_01   | PMX2B                               | 23 | 0 | V\$HOXA7_01     | HOXA7                                                    | 1 | 2 | V\$PIT1_01    | Pit-1                                       | 23 | 0 |
| V\$POU2F3_01  | POU2F3                              | 23 | 0 | V\$POU6F1_01    | POU6F1                                                   | 1 | 2 | V\$PITX1_01   | Pitx1                                       | 23 | 0 |
| V\$POU6F1_02  | POU6F1                              | 23 | 0 | MA0017.1        | NR2F1                                                    | 0 | 1 | V\$PITX2_01   | PITX2                                       | 23 | 0 |
| V\$PREP1_01   | PREP1                               | 23 | 0 | MA0019.1        | Ddit3::Cebpa                                             | 0 | 1 | V\$PITX3_01   | Pitx3                                       | 23 | 0 |
| V\$PROP1_02   | Prop-1                              | 23 | 0 | MA0029.1        | Evi1                                                     | 0 | 1 | V\$PKNOX2_01  | PKNOX2                                      | 23 | 0 |
| V\$PSX1_01    | PSX1                                | 23 | 0 | MA0032.1        | FOXC1                                                    | 0 | 1 | V\$PMX2A_01   | PMX2A                                       | 23 | 0 |
| V\$RAX_01     | rax                                 | 23 | 0 | MA0038.1        | Gfi                                                      | 0 | 1 | V\$PMX2B_01   | PMX2B                                       | 23 | 0 |
| V\$RHGX11_01  | Rhox11                              | 23 | 0 | MA0063.1        | Nkx2-5                                                   | 0 | 1 | V\$POU2F3_01  | POU2F3                                      | 23 | 0 |
| V\$S8_02      | S8                                  | 23 | 0 | MA0073.1        | RREB1                                                    | 0 | 1 | V\$POU6F1_02  | POU6F1                                      | 23 | 0 |
| V\$SATB1_01   | Consensus SATB1<br>Binding Sequence | 23 | 0 | MA0075.1        | Prrx2                                                    | 0 | 1 | V\$PREP1_01   | PREP1                                       | 23 | 0 |
| V\$SHOX2_01   | Shox2                               | 23 | 0 | MA0084.1        | SRY                                                      | 0 | 1 | V\$PROP1_02   | Prop-1                                      | 23 | 0 |

|                  |                                                                         |    |   |                 |                                                          |   |   |                  |                                                                         |    |   |
|------------------|-------------------------------------------------------------------------|----|---|-----------------|----------------------------------------------------------|---|---|------------------|-------------------------------------------------------------------------|----|---|
| V\$SIX1_01       | Six-1                                                                   | 23 | 0 | MA0113.1        | NR3C1                                                    | 0 | 1 | V\$PSX1_01       | PSX1                                                                    | 23 | 0 |
| V\$SIX2_01       | Six-2                                                                   | 23 | 0 | MA0114.1        | HN4A                                                     | 0 | 1 | V\$PXRXR_01      | RXR half-site                                                           | 23 | 0 |
| V\$SIX3_01       | Six-3                                                                   | 23 | 0 | MA0115.1        | NR1H2::RXRA                                              | 0 | 1 | V\$RAX_01        | rax                                                                     | 23 | 0 |
| V\$SIX4_01       | six4                                                                    | 23 | 0 | MA0124.1        | NKX3-1                                                   | 0 | 1 | V\$RHGX11_01     | Rhox11                                                                  | 23 | 0 |
| V\$SIX6_01       | Six-6                                                                   | 23 | 0 | MA0131.1        | MIZF                                                     | 0 | 1 | V\$S8_02         | S8                                                                      | 23 | 0 |
| V\$SOX4_01       | SOX4                                                                    | 23 | 0 | MA0143.1        | Sox2                                                     | 0 | 1 | V\$SAP1A_01      | SAP-1a                                                                  | 23 | 0 |
| V\$SOX_Q6        | SOX                                                                     | 23 | 0 | MA0158.1        | HOXA5                                                    | 0 | 1 | V\$SATB1_01      | Consensus SATB1<br>Binding Sequence                                     | 23 | 0 |
| V\$SP1_02        | Sp1 b.s.                                                                | 23 | 0 | MA0160.1        | NR4A2                                                    | 0 | 1 | V\$SHOX2_01      | Shox2                                                                   | 23 | 0 |
| V\$SP1SP3_Q4     | SP1:SP3                                                                 | 23 | 0 | I\$ANTP_Q6_01   | Antp                                                     | 0 | 1 | V\$SIX1_01       | Six-1                                                                   | 23 | 0 |
| V\$SP2_01        | SP2                                                                     | 23 | 0 | V\$AHR_Q5       | aryl hydrocarbon /<br>dioxin receptor                    | 0 | 1 | V\$SIX2_01       | Six-2                                                                   | 23 | 0 |
| V\$SP4_Q5        | SP4                                                                     | 23 | 0 | V\$AP3_Q6       | AP-3                                                     | 0 | 1 | V\$SIX3_01       | Six-3                                                                   | 23 | 0 |
| V\$STAT1_02      | signal transducer and<br>activator of<br>transcription 1                | 23 | 0 | V\$AREB6_04     | AREB6 (Atp1a1<br>regulatory element<br>binding factor 6) | 0 | 1 | V\$SIX4_01       | six4                                                                    | 23 | 0 |
| V\$STAT1STAT1_Q3 | STAT1:STAT1<br>signal transducer and<br>activator of<br>transcription 3 | 23 | 0 | V\$ARP1_01      | apolipoprotein AI<br>regulatory protein 1                | 0 | 1 | V\$SIX6_01       | Six-6                                                                   | 23 | 0 |
| V\$STAT3_02      | signal transducer and<br>activator of<br>transcription 4                | 23 | 0 | V\$CDC5_01      | cell division control<br>protein 5                       | 0 | 1 | V\$SOX2_Q6       | SOX2                                                                    | 23 | 0 |
| V\$STAT4_01      | signal transducer and<br>activator of<br>transcription 5a               | 23 | 0 | V\$CDPCR3_01    | cut-like homeodomain<br>protein                          | 0 | 1 | V\$SOX4_01       | SOX4                                                                    | 23 | 0 |
| V\$STAT5A_03     | signal transducer and<br>activator of<br>transcription 6                | 23 | 0 | V\$CHCH_01      | Churchill                                                | 0 | 1 | V\$SOX_Q6        | SOX                                                                     | 23 | 0 |
| V\$STAT6_01      | cellular and viral                                                      | 23 | 0 | V\$CLOCKBMAL_Q6 | CLOCK:BMAL                                               | 0 | 1 | V\$SP1_02        | Sp1 b.s.                                                                | 23 | 0 |
| V\$TATA_01       | TATA box elements                                                       | 23 | 0 | V\$COUPTF_Q6    | COUPTF                                                   | 0 | 1 | V\$SP1SP3_Q4     | SP1:SP3                                                                 | 23 | 0 |
| V\$TCF4_01       | TCF-4                                                                   | 23 | 0 | V\$CRX_Q4_01    | CRX                                                      | 0 | 1 | V\$SP2_01        | SP2                                                                     | 23 | 0 |
| V\$TEF_Q6        | TEF                                                                     | 23 | 0 | V\$DMRT1_01     | DMRT1                                                    | 0 | 1 | V\$SP4_Q5        | SP4                                                                     | 23 | 0 |
| V\$TGIF2_01      | TGIF2                                                                   | 23 | 0 | V\$DMRT5_01     | DMRT5                                                    | 0 | 1 | V\$STAT1_02      | signal transducer and<br>activator of<br>transcription 1                | 23 | 0 |
| V\$TGIF_02       | TGIF1                                                                   | 23 | 0 | V\$E2F4DP1_01   | E2F-4:DP-1<br>heterodimer                                | 0 | 1 | V\$STAT1STAT1_Q3 | STAT1:STAT1<br>signal transducer and<br>activator of<br>transcription 3 | 23 | 0 |
| V\$TST1_01       | POU-factor Tst-1/Oct-<br>6                                              | 23 | 0 | V\$EGR2_01      | Egr-2/Krox-20 early<br>growth response gene<br>product   | 0 | 1 | V\$STAT3_02      | signal transducer and<br>activator of<br>transcription 4                | 23 | 0 |
| V\$UNCX4.1_01    | Uncx-4.1                                                                | 23 | 0 | V\$EGR3_01      | early growth response<br>gene 3 product                  | 0 | 1 | V\$STAT4_01      | signal transducer and<br>activator of<br>transcription 5a               | 23 | 0 |
| V\$VAX1_01       | Vax-1                                                                   | 23 | 0 | V\$EGR_Q6       | Egr                                                      | 0 | 1 | V\$STAT5A_03     | transcription 5a                                                        | 23 | 0 |



|                |                                                        |    |   |                |                                       |   |   |               |                                                    |    |   |
|----------------|--------------------------------------------------------|----|---|----------------|---------------------------------------|---|---|---------------|----------------------------------------------------|----|---|
| V\$VAX2_01     | Vax-2                                                  | 23 | 0 | V\$EN1_01      | engrailed 1                           | 0 | 1 | V\$STAT6_01   | signal transducer and activator of transcription 6 | 23 | 0 |
| V\$VSX1_01     | Vsx1                                                   | 23 | 0 | V\$FOXJ3_01    | foxj3                                 | 0 | 1 | V\$TATA_01    | cellular and viral TATA box elements               | 23 | 0 |
| V\$ZFP206_01   | Zfp206                                                 | 23 | 0 | V\$FREAC2_01   | Fork head Related Activator-2         | 0 | 1 | V\$TCF4_01    | TCF-4                                              | 23 | 0 |
| MA0046.1       | HNF1A                                                  | 22 | 0 | V\$GATA1_07    | GATA-1                                | 0 | 1 | V\$TEF_Q6     | TEF                                                | 23 | 0 |
| MA0063.1       | Nkx2-5                                                 | 22 | 0 | V\$GATA6_01    | GATA-6                                | 0 | 1 | V\$TGIF2_01   | TGIF2                                              | 23 | 0 |
| MA0076.1       | ELK4                                                   | 22 | 0 | V\$GRE_C       | Glucocorticoid response element       | 0 | 1 | V\$TGIF_02    | TGIF1                                              | 23 | 0 |
| MA0113.1       | NR3C1                                                  | 22 | 0 | V\$HAND1E47_01 | Hand1:E47 heterodimer                 | 0 | 1 | V\$TST1_01    | POU-factor Tst-1/Oct-6                             | 23 | 0 |
| MA0143.1       | Sox2                                                   | 22 | 0 | V\$HFH1_01     | HNF-3/Fkh Homolog 1                   | 0 | 1 | V\$UNCX4.1_01 | Uncx-4.1                                           | 23 | 0 |
| MA0152.1       | NFATC2                                                 | 22 | 0 | V\$HIF1_Q5     | hypoxia-inducible factor 1            | 0 | 1 | V\$VAX1_01    | Vax-1                                              | 23 | 0 |
| V\$ALPHACP1_01 | alpha-CP1                                              | 22 | 0 | V\$HOXA4_Q2    | HOXA4                                 | 0 | 1 | V\$VAX2_01    | Vax-2                                              | 23 | 0 |
| V\$AP2_Q6      | activator protein 2                                    | 22 | 0 | V\$HSF2_Q3     | HSF2                                  | 0 | 1 | V\$VSX1_01    | Vsx1                                               | 23 | 0 |
| V\$BEN_01      | BEN                                                    | 22 | 0 | V\$IK2_01      | Ikaros 2                              | 0 | 1 | V\$ZFP206_01  | Zfp206                                             | 23 | 0 |
| V\$BLIMP1_Q6   | BLIMP1                                                 | 22 | 0 | V\$IRF8_Q6     | IRF8                                  | 0 | 1 | MA0040.1      | Foxq1                                              | 22 | 0 |
| V\$CREBATF_Q6  | CREB, ATF                                              | 22 | 0 | V\$ISL1_Q6     | ISL1                                  | 0 | 1 | MA0046.1      | HNF1A                                              | 22 | 0 |
| V\$EHF_01      | EHF                                                    | 22 | 0 | V\$KROX_Q6     | KROX                                  | 0 | 1 | MA0081.1      | SPIB                                               | 22 | 0 |
| V\$ETS2_B      | c-Ets-2 binding sites ectopic viral integration site 1 | 22 | 0 | V\$LXR_DR4_Q3  | LXR direct repeat 4                   | 0 | 1 | MA0143.1      | Sox2                                               | 22 | 0 |
| V\$EVI1_04     | encoded factor                                         | 22 | 0 | V\$mTERF_01    | mTERF binding site                    | 0 | 1 | MA0152.1      | NFATC2                                             | 22 | 0 |
| V\$FOXO1_02    | fork head box O1                                       | 22 | 0 | V\$MYCMAX_Q3   | c-Myc:Max heterodimer                 | 0 | 1 | V\$AFP1_Q6    | AFP1                                               | 22 | 0 |
| V\$FOXO3_01    | fork head box O3                                       | 22 | 0 | V\$NANOG_Q2    | Nanog                                 | 0 | 1 | V\$BEN_01     | BEN                                                | 22 | 0 |
| V\$GAF_Q6      | GAF                                                    | 22 | 0 | V\$NFMUE1_Q6   | NF-muE1                               | 0 | 1 | V\$CHCH_01    | Churchill                                          | 22 | 0 |
| V\$HNF3_Q6_01  | HNF3                                                   | 22 | 0 | V\$NGFIC_Q1    | nerve growth factor-induced protein C | 0 | 1 | V\$CREBATF_Q6 | CREB, ATF                                          | 22 | 0 |
| V\$HNF3B_01    | Hepatocyte Nuclear Factor 3beta                        | 22 | 0 | V\$NKX61_01    | NKX6-1                                | 0 | 1 | V\$E2F4DP2_01 | E2F-4:DP-2 heterodimer                             | 22 | 0 |
| V\$ICSBP_Q6    | ICSBP                                                  | 22 | 0 | V\$NURR1_Q3    | NURR1                                 | 0 | 1 | V\$EHF_01     | EHF                                                | 22 | 0 |
| V\$IRF7_01     | interferon regulatory factor 7                         | 22 | 0 | V\$OG2_01      | OG-2                                  | 0 | 1 | V\$ETS_Q4     | Ets                                                | 22 | 0 |
| V\$NRF1_Q6     | nuclear respiratory factor 1                           | 22 | 0 | V\$PAX2_Q2     | paired box factor 2                   | 0 | 1 | V\$ETS_Q4     | ectopic viral integration site 1                   | 22 | 0 |
| V\$PITX3_01    | Pitx3                                                  | 22 | 0 | V\$PAX4_Q2     | Pax-4 binding sites                   | 0 | 1 | V\$EVI1_04    | encoded factor                                     | 22 | 0 |
| V\$PU1_Q4      | PU.1                                                   | 22 | 0 | V\$PIT1_Q6     | Pit-1                                 | 0 | 1 | V\$FLI1_Q6    | FLI1                                               | 22 | 0 |
| V\$PXRXR_01    | RXR half-site                                          | 22 | 0 | V\$POU3F2_Q2   | Pit-1                                 | 0 | 1 | V\$FOXJ2_Q2   | fork head box J 2                                  | 22 | 0 |
| V\$SIRT6_01    | SIRT6                                                  | 22 | 0 | V\$RNF96_01    | POU3F2                                | 0 | 1 | V\$FOXO1_02   | fork head box O1                                   | 22 | 0 |
|                |                                                        |    |   |                |                                       |   |   | V\$FREAC7_01  | Fork head Related Activator-7                      | 22 | 0 |

|                     |                                            |    |   |                         |                                                        |   |   |                     |                                            |    |   |
|---------------------|--------------------------------------------|----|---|-------------------------|--------------------------------------------------------|---|---|---------------------|--------------------------------------------|----|---|
| V\$TR4_01           | TR4                                        | 22 | 0 | V\$RP58_01              | 58 KDA repressor protein                               | 0 | 1 | V\$GAF_Q6           | GAF                                        | 22 | 0 |
| MA0033.1            | FOXL1                                      | 21 | 0 | V\$S8_01                | S8                                                     | 0 | 1 | V\$HBP1_Q2          | hbp1                                       | 22 | 0 |
| MA0038.1            | Gfi                                        | 21 | 0 | V\$SATB1_Q3             | SATB1                                                  | 0 | 1 | V\$HNF3_Q6_01       | HNF3                                       | 22 | 0 |
| MA0139.1            | CTCF                                       | 21 | 0 | V\$SIRT6_01             | SIRT6                                                  | 0 | 1 | V\$HNF3B_01         | Hepatocyte Nuclear Factor 3beta            | 22 | 0 |
| V\$AFP1_Q6          | AFP1                                       | 21 | 0 | V\$SOX5_01              | Sox-5                                                  | 0 | 1 | V\$HP1SITEFACTOR_Q6 | HP1 site factor                            | 22 | 0 |
| V\$ATF_B            | ATF binding site                           | 21 | 0 | V\$SPZ1_01              | spermatogenic Zip                                      | 0 | 1 | V\$ICSBP_Q6         | ICSBP                                      | 22 | 0 |
| V\$CEBPGAMMA_Q6     | C/EBPgamma                                 | 21 | 0 | V\$STAT1STAT1_Q3        | STAT1:STAT1                                            | 0 | 1 | V\$NANOG_02         | Nanog                                      | 22 | 0 |
| V\$CHCH_01          | Churchill                                  | 21 | 0 | V\$SZF11_01             | SZF1-1                                                 | 0 | 1 | V\$NFAT1_Q6         | NFAT1                                      | 22 | 0 |
| V\$COMP1_01         | COMP1                                      | 21 | 0 | V\$TATA_C               | Retroviral TATA box                                    | 0 | 1 | V\$NFAT2_Q5         | NF-AT2                                     | 22 | 0 |
| V\$CREB_01          | cAMP-responsive element binding protein    | 21 | 0 | V\$TBP_Q6               | TBP                                                    | 0 | 1 | V\$PEA3_Q6          | PEA3                                       | 22 | 0 |
| V\$CREBP1CJUN_01    | CRE-binding protein 1:c-Jun heterodimer    | 21 | 0 | V\$TBX18_01             | T-box 18                                               | 0 | 1 | V\$POU1F1_Q6        | POU1F1                                     | 22 | 0 |
| V\$E2F1DP1_01       | E2F-1:DP-1 heterodimer                     | 21 | 0 | V\$TBX22_01             | TBX22                                                  | 0 | 1 | V\$PU1_Q4           | PU.1                                       | 22 | 0 |
| V\$EGR_Q6           | Egr                                        | 21 | 0 | V\$TBX5_02              | TBX5                                                   | 0 | 1 | V\$RNF96_01         | RNF96                                      | 22 | 0 |
| V\$FOXO3A_Q1        | FOXO3A                                     | 21 | 0 | V\$USF2_Q6              | USF2                                                   | 0 | 1 | V\$STAT3STAT3_Q3    | STAT3:STAT3                                | 22 | 0 |
| V\$HBP1_Q2          | hbp1                                       | 21 | 0 | V\$VBP_01               | PAR-type chicken vitellogenin promoter-binding protein | 0 | 1 | MA0033.1            | FOXL1                                      | 21 | 0 |
| V\$HFH1_01          | HNF-3/Fkh Homolog 1                        | 21 | 0 | V\$ZF5_01               | ZF5                                                    | 0 | 1 | MA0038.1            | Gfi                                        | 21 | 0 |
| V\$HNF6_Q6          | HNF6                                       | 21 | 0 | V\$ZFX_01               | Zfx                                                    | 0 | 1 | MA0051.1            | IRF2                                       | 21 | 0 |
| V\$HP1SITEFACTOR_Q6 | HP1 site factor                            | 21 | 0 | V\$ZIC1_01              | zinc finger protein of the cerebellum 1                | 0 | 1 | MA0113.1            | NR3C1                                      | 21 | 0 |
| V\$NANOG_02         | Nanog                                      | 21 | 0 | MA0033.1                | FOXL1                                                  | 0 | 2 | MA0139.1            | CTCF                                       | 21 | 0 |
| V\$OCT4_01          | Sox2-Oct4 joint motif, in silico predicted | 21 | 0 | MA0052.1                | MEF2A                                                  | 0 | 2 | MA0156.1            | FEV                                        | 21 | 0 |
| V\$OTX_Q1           | OTX                                        | 21 | 0 | V\$BCL6_01              | BCL6                                                   | 0 | 2 | V\$ALPHACP1_01      | alpha-CP1                                  | 21 | 0 |
| V\$POU1F1_Q6        | POU1F1                                     | 21 | 0 | V\$BDP1_01              | BDP1                                                   | 0 | 2 | V\$ATF_B            | ATF binding site                           | 21 | 0 |
| V\$STAT3STAT3_Q3    | STAT3:STAT3                                | 21 | 0 | V\$CACBINDINGPROTEIN_Q6 | CAC-binding protein                                    | 0 | 2 | V\$BLIMP1_Q6        | BLIMP1                                     | 21 | 0 |
| V\$UF1H3BETA_Q6     | UF1H3BETA                                  | 21 | 0 | V\$CMYB_01              | c-Myb                                                  | 0 | 2 | V\$BRCA_01          | BRCA1 containing protein complex with USF2 | 21 | 0 |
| V\$YY1_01           | Yin and Yang 1                             | 21 | 0 | V\$FAC1_01              | fetal Alz-50 clone 1                                   | 0 | 2 | V\$CEBPB_01         | CCAAT/enhancer binding protein beta        | 21 | 0 |
| V\$ZFP281_01        | Zfp281                                     | 21 | 0 | V\$FOXO1_Q5             | FOXO1                                                  | 0 | 2 | V\$COMP1_01         | COMP1                                      | 21 | 0 |
| MA0027.1            | En1                                        | 20 | 0 | V\$FOXO4_02             | fork head box O4                                       | 0 | 2 | V\$E2F1DP1RB_01     | Rb:E2F-1:DP-1 trimeric complex             | 21 | 0 |
| MA0031.1            | FOXD1                                      | 20 | 0 | V\$FOXP1_01             | FOXP1                                                  | 0 | 2 | V\$E2F1DP2_01       | E2F-1:DP-2 heterodimer                     | 21 | 0 |
| MA0040.1            | Foxq1                                      | 20 | 0 | V\$GTF2IRD1_01          | GTF2IRD1-isoform2                                      | 0 | 2 | V\$E2F4DP1_01       | E2F-4:DP-1 heterodimer                     | 21 | 0 |

|                |                                                                         |    |   |                 |                                               |   |   |                 |                                                              |    |   |
|----------------|-------------------------------------------------------------------------|----|---|-----------------|-----------------------------------------------|---|---|-----------------|--------------------------------------------------------------|----|---|
| MA0050.1       | IRF1                                                                    | 20 | 0 | V\$GZF1_01      | plays a role in renal branching morphogenesis | 0 | 2 | V\$EGR_Q6       | Egr                                                          | 21 | 0 |
| MA0051.1       | IRF2                                                                    | 20 | 0 | V\$HES1_Q2      | HES1                                          | 0 | 2 | V\$ETS2_Q6      | ETS2                                                         | 21 | 0 |
| MA0158.1       | HOXA5                                                                   | 20 | 0 | V\$HNF8_01      | HNF-3/Fkh Homolog-8                           | 0 | 2 | V\$FOXO3A_Q1    | FOXO3A                                                       | 21 | 0 |
| V\$AIRE_01     | AIRE                                                                    | 20 | 0 | V\$HNF3ALPHA_Q6 | HNF3alpha                                     | 0 | 2 | V\$GATA3_03     | GATA-binding factor 3                                        | 21 | 0 |
| V\$BRCA_01     | BRCA1 containing protein complex with USF2                              | 20 | 0 | V\$HOXA13_01    | HOXA13 binding site                           | 0 | 2 | V\$HNF6_Q6      | HNF6                                                         | 21 | 0 |
| V\$E2F1DP2_01  | E2F-1:DP-2 heterodimer                                                  | 20 | 0 | V\$LUN1_01      | LUN-1                                         | 0 | 2 | V\$OCT4_01      | Sox2-Oct4 joint motif, in silico predicted                   | 21 | 0 |
| V\$E2F4DP2_01  | E2F-4:DP-2 heterodimer                                                  | 20 | 0 | V\$MECP2_01     | MECP2 b.s.                                    | 0 | 2 | V\$POU5F1_01    | POU5F1 b.s.                                                  | 21 | 0 |
| V\$FAC1_01     | fetal Alz-50 clone 1                                                    | 20 | 0 | V\$OTX2_Q3      | OTX2                                          | 0 | 2 | V\$SIRT6_01     | SIRT6                                                        | 21 | 0 |
| V\$FOXJ2_02    | fork head box J 2 Zinc finger protein FPM315 with KRAB and SCAN domains | 20 | 0 | V\$PITX2_Q2     | pituitary homeobox factor 2                   | 0 | 2 | V\$SOX9_B1      | SOX (SRY-related HMG box)                                    | 21 | 0 |
| V\$FPM315_01   | Fork head RElated                                                       | 20 | 0 | V\$RSRFC4_01    | related to serum response factor, C4          | 0 | 2 | V\$ZF5_01       | ZF5                                                          | 21 | 0 |
| V\$FREAC2_01   | ACTivator-2 Fork head RElated                                           | 20 | 0 | V\$SMAD1_01     | SMAD1                                         | 0 | 2 | MA0018.2        | CREB1                                                        | 20 | 0 |
| V\$FREAC7_01   | ACTivator-7                                                             | 20 | 0 | V\$YY1_Q6       | YY1                                           | 0 | 2 | MA0030.1        | FOXF2                                                        | 20 | 0 |
| V\$GATA4_Q3    | GATA-4                                                                  | 20 | 0 | V\$YY2          | YY2                                           | 0 | 2 | MA0050.1        | IRF1                                                         | 20 | 0 |
| V\$GKLF_02     | GKLF (KLF4)                                                             | 20 | 0 | V\$ZNF333_01    | ZNF333                                        | 0 | 2 | I\$ANTP_Q6_01   | Antp                                                         | 20 | 0 |
| V\$ISRE_01     | interferon-stimulated response element                                  | 20 | 0 | V\$BRF1_01      | BRF-1                                         | 0 | 3 | V\$AREB6_04     | AREB6 (Atp1a1 regulatory element binding factor 6)           | 20 | 0 |
| V\$POU3F2_02   | POU3F2                                                                  | 20 | 0 | V\$FOXD3_01     | fork head box D3                              | 0 | 3 | V\$DMRT7_01     | DMRT7                                                        | 20 | 0 |
| V\$POU5F1_01   | POU5F1 b.s.                                                             | 20 | 0 | V\$FOXJ2_02     | fork head box J 2                             | 0 | 3 | V\$FAC1_01      | fetal Alz-50 clone 1 Fork head RElated                       | 20 | 0 |
| V\$PTF1BETA_Q6 | PTF1-beta                                                               | 20 | 0 | V\$FOXO3A_Q1    | FOXO3A                                        | 0 | 3 | V\$FREAC2_01    | ACTivator-2 HNF-3/Fkh Homolog                                | 20 | 0 |
| V\$RNF96_01    | RNF96                                                                   | 20 | 0 | V\$FREAC7_01    | Fork head RElated ACTivator-7                 | 0 | 3 | V\$HNF1_01      | 1                                                            | 20 | 0 |
| V\$SOX9_B1     | SOX (SRY-related HMG box)                                               | 20 | 0 | V\$HNF3_Q6_01   | HNF3                                          | 0 | 3 | V\$ISRE_01      | interferon-stimulated response element                       | 20 | 0 |
| V\$STAT_01     | signal transducers and activators of transcription                      | 20 | 0 | MA0042.1        | FOXI1                                         | 0 | 4 | V\$POU3F2_02    | POU3F2                                                       | 20 | 0 |
| V\$TEL2_Q6     | Tel-2                                                                   | 20 | 0 | V\$HFH3_01      | HFH-3 (HNF3/fork head homolog 3)              | 0 | 4 | V\$PTF1BETA_Q6  | PTF1-beta signal transducers and activators of transcription | 20 | 0 |
| V\$TFIIA_Q6    | TFIIA                                                                   | 20 | 0 | V\$HFH4_01      | HFH4 (FOXJ1)                                  | 0 | 4 | V\$STAT_01      |                                                              | 20 | 0 |
| MA0018.2       | CREB1                                                                   | 19 | 0 | V\$MEF2C_01     | MEF-2C                                        | 0 | 4 | V\$TFIIA_Q6     | TFIIA                                                        | 20 | 0 |
| MA0030.1       | FOXF2                                                                   | 19 | 0 | MA0041.1        | Foxd3                                         | 0 | 5 | V\$TR4_01       | TR4                                                          | 20 | 0 |
| MA0142.1       | Pou5f1                                                                  | 19 | 0 | V\$RPC155_01    | RPC155                                        | 0 | 5 | V\$UF1H3BETA_Q6 | UF1H3BETA                                                    | 20 | 0 |

|                 |                                                            |    |   |           |             |   |   |                 |                                                    |    |   |
|-----------------|------------------------------------------------------------|----|---|-----------|-------------|---|---|-----------------|----------------------------------------------------|----|---|
| V\$ANTP_Q6_01   | Antp activating transcription factor 3                     | 19 | 0 | V\$FOX_Q2 | FOX factors | 0 | 6 | V\$YY1_01       | Yin and Yang 1                                     | 20 | 0 |
| V\$ATF3_Q6      | transcription factor 3                                     | 19 | 0 |           |             |   |   | MA0031.1        | FOXD1                                              | 19 | 0 |
| V\$CREBP1_Q2    | CRE-binding protein 1                                      | 19 | 0 |           |             |   |   | V\$AIRE_01      | AIRE                                               | 19 | 0 |
| V\$DMRT7_01     | DMRT7                                                      | 19 | 0 |           |             |   |   | V\$ATF1_Q6      | ATF1                                               | 19 | 0 |
| V\$E2F1DP1RB_01 | Rb:E2F-1:DP-1 trimeric complex                             | 19 | 0 |           |             |   |   | V\$CREBP1_Q2    | CRE-binding protein 1                              | 19 | 0 |
| V\$E2F4DP1_01   | E2F-4:DP-1 heterodimer                                     | 19 | 0 |           |             |   |   | V\$EFC_Q6       | RFX1 (EF-C)                                        | 19 | 0 |
| V\$ESE1_Q3      | ESE1                                                       | 19 | 0 |           |             |   |   | V\$HNF3ALPHA_Q6 | HNF3alpha                                          | 19 | 0 |
| V\$FREAC3_01    | Fork head RElated ACTivator-3 growth factor independence 1 | 19 | 0 |           |             |   |   | V\$IRF8_Q6      | IRF8                                               | 19 | 0 |
| V\$GFI1_01      | independence 1                                             | 19 | 0 |           |             |   |   | V\$ISL1_Q6      | ISL1                                               | 19 | 0 |
| V\$HNF3ALPHA_Q6 | HNF3alpha                                                  | 19 | 0 |           |             |   |   | V\$SOX5_01      | Sox-5                                              | 19 | 0 |
| V\$IRF8_Q6      | IRF8                                                       | 19 | 0 |           |             |   |   | V\$TEL2_Q6      | Tel-2                                              | 19 | 0 |
| V\$SAP1A_01     | SAP-1a                                                     | 19 | 0 |           |             |   |   | V\$ZFP281_01    | Zfp281                                             | 19 | 0 |
| V\$SMAD1_01     | SMAD1                                                      | 19 | 0 |           |             |   |   | MA0075.1        | Prrx2                                              | 18 | 0 |
| V\$SOX5_01      | Sox-5                                                      | 19 | 0 |           |             |   |   |                 | activating transcription factor 3                  | 18 | 0 |
| MA0101.1        | REL                                                        | 18 | 0 |           |             |   |   | V\$FOX_Q2       | FOX factors                                        | 18 | 0 |
| V\$AREB6_04     | AREB6 (Atp1a1 regulatory element binding factor 6)         | 18 | 0 |           |             |   |   |                 | Fork head RElated ACTivator-3                      | 18 | 0 |
| V\$GATA3_03     | GATA-binding factor 3 myocyte enhancer factor              | 18 | 0 |           |             |   |   | V\$FREAC3_01    | ACTivator-3                                        | 18 | 0 |
| V\$HMEF2_Q6     | factor                                                     | 18 | 0 |           |             |   |   | V\$GATA4_Q3     | GATA-4 growth factor independence 1                | 18 | 0 |
| V\$TFEB_01      | TFEB                                                       | 18 | 0 |           |             |   |   | V\$GFI1_01      | independence 1                                     | 18 | 0 |
| MA0075.1        | Prrx2                                                      | 17 | 0 |           |             |   |   | V\$HSF2_01      | heat shock factor 2 modulator recognition factor 2 | 18 | 0 |
| V\$AP1_Q6       | activator protein 1                                        | 17 | 0 |           |             |   |   | V\$MRF2_01      | factor 2                                           | 18 | 0 |
| V\$ATF1_Q6      | ATF1                                                       | 17 | 0 |           |             |   |   | V\$AR_Q2        | androgen receptor                                  | 17 | 0 |
| V\$HFH8_01      | HNF-3/Fkh Homolog-8                                        | 17 | 0 |           |             |   |   | V\$DMRT4_01     | DMRT4                                              | 17 | 0 |
| V\$TAL1_01      | Tal-1 (Scl)                                                | 17 | 0 |           |             |   |   | V\$FOXD3_01     | fork head box D3 myocyte enhancer factor           | 17 | 0 |
| MA0125.1        | Nobox                                                      | 16 | 0 |           |             |   |   | V\$HMEF2_Q6     | Se-Cys tRNA gene transcription activating factor   | 17 | 0 |
| MA0135.1        | Lhx3                                                       | 16 | 0 |           |             |   |   | V\$STAF_01      | activating factor                                  | 17 | 0 |
| MA0144.1        | Stat3                                                      | 16 | 0 |           |             |   |   | V\$TFEB_01      | TFEB                                               | 17 | 1 |
| V\$CEBPE_01     | cebpe                                                      | 16 | 0 |           |             |   |   | MA0109.1        | Hltf                                               | 16 | 0 |
| V\$CIZ_01       | CIZ (Cas-associated zinc finger protein)                   | 16 | 0 |           |             |   |   | MA0125.1        | Nobox                                              | 16 | 0 |
| V\$EFC_Q6       | RFX1 (EF-C)                                                | 16 | 0 |           |             |   |   | MA0135.1        | Lhx3                                               | 16 | 0 |
|                 |                                                            |    |   |           |             |   |   | MA0142.1        | Pou5f1                                             | 16 | 0 |

|               |                                                                                         |    |   |                 |                                                                         |    |   |
|---------------|-----------------------------------------------------------------------------------------|----|---|-----------------|-------------------------------------------------------------------------|----|---|
| V\$FOXJ3_01   | foxj3                                                                                   | 16 | 0 | V\$CEBPE_01     | cebpe                                                                   | 16 | 0 |
| V\$HSF_Q6     | HSF<br>new ets-related factor                                                           | 16 | 0 | V\$CIZ_01       | CIZ (Cas-associated<br>zinc finger protein)                             | 16 | 0 |
| V\$NERF_Q2    | 1a                                                                                      | 16 | 0 | V\$FOXJ3_01     | foxj3                                                                   | 16 | 0 |
| V\$FOXD3_01   | fork head box D3                                                                        | 16 | 1 | V\$GATA_C       | GATA binding site                                                       | 16 | 0 |
| V\$AR_Q6      | half-site matrix                                                                        | 15 | 0 | V\$HSF1_01      | heat shock factor 1                                                     | 16 | 0 |
| V\$ATF5_01    | ATF5 binding site                                                                       | 15 | 0 | V\$RUSH1A_02    | RUSH-1alpha                                                             | 16 | 0 |
| V\$FOX_Q2     | FOX factors                                                                             | 15 | 0 | V\$SMAD1_01     | SMAD1                                                                   | 16 | 0 |
| V\$FRA1_Q5    | FRA1                                                                                    | 15 | 0 | MA0087.1        | Sox5                                                                    | 15 | 0 |
| V\$GATA_C     | GATA binding site<br>glucocorticoid                                                     | 15 | 0 | MA0101.1        | REL                                                                     | 15 | 0 |
| V\$GR_Q6      | receptor                                                                                | 15 | 0 | V\$ESE1_Q3      | ESE1<br>Zinc finger protein<br>FPM315 with KRAB<br>and SCAN domains     | 15 | 0 |
| V\$HSF1_01    | heat shock factor 1                                                                     | 15 | 0 | V\$FPM315_01    |                                                                         | 15 | 0 |
| V\$HSF2_01    | heat shock factor 2                                                                     | 15 | 0 | V\$HNF4ALPHA_Q6 | HNF4alpha                                                               | 15 | 0 |
| V\$KLF15_Q2   | KLF15                                                                                   | 15 | 0 | V\$HSF_Q6       | HSF<br>X-box binding protein                                            | 15 | 0 |
| V\$LEF1_Q2_01 | LEF1                                                                                    | 15 | 0 | V\$RFX1_02      | RFX1                                                                    | 15 | 0 |
| V\$NFKB_Q6_01 | NF-kappaB                                                                               | 15 | 0 | V\$STRA13_01    | Stra13<br>PAR-type chicken<br>vitellogenin promoter-<br>binding protein | 15 | 0 |
| V\$RFX1_02    | X-box binding protein<br>RFX1<br>Se-Cys tRNA gene<br>transcription<br>activating factor | 15 | 0 | V\$VBP_01       |                                                                         | 15 | 0 |
| V\$STAF_01    |                                                                                         | 15 | 0 | MA0041.1        | Foxd3                                                                   | 14 | 0 |
| V\$STRA13_01  | Stra13                                                                                  | 15 | 0 | V\$CEBPDELTA_Q6 | C/EBPdelta<br>HNF-3/Fkh Homolog-<br>8                                   | 14 | 0 |
| MA0014.1      | Pax5                                                                                    | 14 | 0 | V\$HFH8_01      |                                                                         | 14 | 0 |
| V\$DMRT4_01   | DMRT4                                                                                   | 14 | 0 | V\$IK1_01       | Ikaros 1                                                                | 14 | 0 |
| V\$IK1_01     | Ikaros 1<br>modulator recognition                                                       | 14 | 0 | V\$PLZF_02      | PLZF                                                                    | 14 | 0 |
| V\$MRF2_01    | factor 2                                                                                | 14 | 0 | V\$RFX3_01      | RFX3 dimer                                                              | 14 | 0 |
| V\$RSRFC4_Q2  | RSRFC4                                                                                  | 14 | 0 | V\$RSRFC4_Q2    | RSRFC4                                                                  | 14 | 0 |
| V\$WT1_Q6     | WT1                                                                                     | 14 | 0 | MA0014.1        | Pax5                                                                    | 13 | 0 |
| V\$ZABC1_01   | ZABC1 b.s.                                                                              | 14 | 0 | MA0093.1        | USF1                                                                    | 13 | 0 |
| MA0042.1      | FOXI1                                                                                   | 13 | 0 | V\$AP2GAMMA_01  | AP-2gamma                                                               | 13 | 0 |
| MA0056.1      | MZF1_1-4                                                                                | 13 | 0 | V\$CREL_01      | c-Rel                                                                   | 13 | 0 |
| MA0087.1      | Sox5                                                                                    | 13 | 0 | V\$GATA1_05     | GATA-binding factor 1<br>glucocorticoid                                 | 13 | 0 |
| MA0107.1      | RELA                                                                                    | 13 | 0 | V\$GR_Q6        | receptor<br>hepatic nuclear factor                                      | 13 | 0 |
| MA0148.1      | FOXA1                                                                                   | 13 | 0 | V\$HNF4_01      | 4                                                                       | 13 | 0 |

|                  |                                                        |    |   |                |                             |    |   |
|------------------|--------------------------------------------------------|----|---|----------------|-----------------------------|----|---|
| V\$AP1FJ_Q2      | activator protein 1                                    | 13 | 0 | V\$ZNF333_01   | ZNF333                      | 13 | 0 |
| V\$CREL_01       | c-Rel                                                  | 13 | 0 | MA0004.1       | Arnt                        | 12 | 0 |
| V\$HNF4_01       | hepatic nuclear factor 4                               | 13 | 0 | MA0025.1       | NFIL3                       | 12 | 0 |
| V\$ISL1_Q6       | ISL1                                                   | 13 | 0 | MA0058.1       | MAX                         | 12 | 0 |
| V\$NFKAPPAB65_01 | NF-kappaB (p65)                                        | 13 | 0 | MA0144.1       | Stat3                       | 12 | 0 |
| V\$PLZF_02       | PLZF                                                   | 13 | 0 | MA0148.1       | FOXA1                       | 12 | 0 |
| V\$ZF5_01        | ZF5                                                    | 13 | 0 | V\$FOXM1_01    | FOXM1                       | 12 | 0 |
| MA0109.1         | Hltf                                                   | 12 | 0 | V\$MECP2_02    | MECP2 b.s.                  | 12 | 0 |
| V\$CEBPDELTA_Q6  | C/EBPdelta                                             | 12 | 0 | V\$TAL1_01     | Tal-1 (Scl)                 | 12 | 0 |
| V\$EAR2_Q2       | EAR2                                                   | 12 | 0 | V\$USF_01      | upstream stimulating factor | 12 | 0 |
| V\$HNF3A_01      | FOXA1                                                  | 12 | 0 | V\$WHN_B       | winged-helix factor nude    | 12 | 0 |
| V\$RUSH1A_02     | RUSH-1alpha                                            | 12 | 0 | V\$ZABC1_01    | ZABC1 b.s.                  | 12 | 0 |
|                  | PAR-type chicken vitellogenin promoter-binding protein |    |   | V\$TCF3_01     | TCF-3                       | 12 | 2 |
| V\$VBP_01        |                                                        | 12 | 0 | MA0052.1       | MEF2A                       | 11 | 0 |
| V\$ZNF333_01     | ZNF333                                                 | 12 | 0 | MA0124.1       | NKX3-1                      | 11 | 0 |
| MA0041.1         | Foxd3                                                  | 12 | 1 | MA0132.1       | Pdx1                        | 11 | 0 |
| MA0047.2         | Foxa2                                                  | 11 | 0 | V\$KLF15_Q2    | KLF15                       | 11 | 0 |
| V\$FOXM1_01      | FOXM1                                                  | 11 | 0 | V\$LEF1_Q2_01  | LEF1                        | 11 | 0 |
| V\$GATA1_05      | GATA-binding factor 1                                  | 11 | 0 | V\$NFKB_Q6_01  | NF-kappaB                   | 11 | 0 |
| V\$LEF1TCF1_Q4   | LEF1, TCF1                                             | 11 | 0 | V\$WT1_Q6      | WT1                         | 11 | 1 |
| V\$TCF3_01       | TCF-3                                                  | 11 | 2 | MA0042.1       | FOXI1                       | 10 | 0 |
| MA0025.1         | NFIL3                                                  | 10 | 0 | MA0047.2       | Foxa2                       | 10 | 0 |
| MA0052.1         | MEF2A                                                  | 10 | 0 | MA0162.1       | Egr1                        | 10 | 0 |
| MA0093.1         | USF1                                                   | 10 | 0 | V\$ATF5_01     | ATF5 binding site           | 10 | 0 |
| V\$HFH3_01       | HFH-3 (HNF3/fork head homolog 3)                       | 10 | 0 | V\$E4BP4_01    | E4BP4                       | 10 | 0 |
| V\$MECP2_02      | MECP2 b.s.                                             | 10 | 0 | V\$EAR2_Q2     | EAR2                        | 10 | 0 |
| V\$MZF1_01       | MZF1                                                   | 10 | 0 | V\$LEF1TCF1_Q4 | LEF1, TCF1                  | 10 | 0 |
| V\$RFX3_01       | RFX3 dimer                                             | 10 | 0 |                |                             |    |   |
|                  | signal transducer and activator of transcription 5b    |    |   | V\$REX1_03     | REX1                        | 10 | 0 |
| V\$STAT5B_01     |                                                        | 10 | 0 | MA0003.1       | TFAP2A                      | 9  | 0 |
| MA0004.1         | Arnt                                                   | 9  | 0 | MA0006.1       | Arnt::Ahr                   | 9  | 0 |
| V\$AP2GAMMA_01   | AP-2gamma                                              | 9  | 0 | MA0043.1       | HLF                         | 9  | 0 |
| V\$HTF_01        | HTF                                                    | 9  | 0 | V\$AP2ALPHA_01 | AP-2alpha                   | 9  | 0 |
| V\$NF1_Q6_01     | NF-1                                                   | 9  | 0 |                |                             |    |   |

|                   |                                                       |   |   |                   |                                                     |   |   |
|-------------------|-------------------------------------------------------|---|---|-------------------|-----------------------------------------------------|---|---|
| V\$USF_01         | upstream stimulating factor                           | 9 | 0 | V\$DMRT5_01       | DMRT5                                               | 9 | 0 |
| MA0162.1          | Egr1                                                  | 8 | 0 | V\$E4F1_Q6        | E4F1                                                | 9 | 0 |
| V\$CHX10_01       | CHX10                                                 | 8 | 0 | V\$HFH3_01        | HFH-3 (HNF3/fork head homolog 3)                    | 9 | 0 |
| V\$DMRT5_01       | DMRT5                                                 | 8 | 0 | V\$HTF_01         | HTF                                                 | 9 | 0 |
| V\$FREAC4_01      | Fork head RElated ACTivator-4                         | 8 | 0 | V\$PR_02          | progesterone receptor                               | 9 | 0 |
| V\$HNF4ALPHA_Q6   | HNF4alpha                                             | 8 | 0 | V\$RBPJK_01       | RBP-Jkappa                                          | 9 | 0 |
| V\$SRF_03         | SRF b.s.                                              | 8 | 0 | MA0088.1          | znf143                                              | 8 | 0 |
| MA0003.1          | TFAP2A                                                | 7 | 0 | V\$CHX10_01       | CHX10                                               | 8 | 0 |
| MA0043.1          | HLF                                                   | 7 | 0 | V\$HNF3A_01       | FOXA1                                               | 8 | 0 |
| MA0140.1          | Tal1::Gata1                                           | 7 | 0 | V\$NERF_Q2        | new ets-related factor 1a                           | 8 | 0 |
| V\$AP2ALPHA_01    | AP-2alpha                                             | 7 | 0 | V\$STAT5B_01      | signal transducer and activator of transcription 5b | 8 | 0 |
| V\$DMRT2_01       | DMRT2                                                 | 7 | 0 | V\$ZFX_01         | Zfx                                                 | 8 | 0 |
| V\$E4BP4_01       | E4BP4                                                 | 7 | 0 | MA0107.1          | RELA                                                | 7 | 0 |
| V\$LBP1_Q6        | LBP-1                                                 | 7 | 0 | V\$GATA2_02       | GATA-binding factor 2                               | 7 | 0 |
| V\$MEIS1AHOXA9_01 | Meis-1a:HOXA9 heterodimeric binding                   | 7 | 0 | V\$GATA6_01       | GATA-6                                              | 7 | 0 |
| V\$NEUROD_02      | NeuroD                                                | 7 | 0 | V\$SRF_02         | serum response factor                               | 7 | 0 |
| V\$RBPJK_Q4       | RBP-Jkappa                                            | 7 | 0 | MA0029.1          | Evi1                                                | 6 | 0 |
| MA0132.1          | Pdx1                                                  | 7 | 1 | MA0140.1          | Tal1::Gata1                                         | 6 | 0 |
| MA0006.1          | Arnt::Ahr                                             | 6 | 0 | MA0164.1          | Nr2e3                                               | 6 | 0 |
| MA0029.1          | Evi1                                                  | 6 | 0 | V\$CLOCKBMAL_Q6   | CLOCK:BMAL                                          | 6 | 0 |
| MA0088.1          | znf143                                                | 6 | 0 | V\$DMRT2_01       | DMRT2                                               | 6 | 0 |
| V\$GATA2_02       | GATA-binding factor 2                                 | 6 | 0 | V\$DMRT3_01       | DMRT3                                               | 6 | 0 |
| V\$GATA6_01       | GATA-6                                                | 6 | 0 | V\$FREAC4_01      | Fork head RElated ACTivator-4                       | 6 | 0 |
| V\$MAX_01         | Max                                                   | 6 | 0 | V\$MEIS1BHOXA9_02 | Meis-1b:HOXA9 heterodimeric binding                 | 6 | 0 |
| V\$NRSF_01        | neuron-restrictive silencer factor                    | 6 | 0 | V\$MYB_Q5_01      | MYB                                                 | 6 | 0 |
| V\$PR_01          | high affinity binding sites for progesterone receptor | 6 | 0 | V\$NF1_Q6_01      | NF-1                                                | 6 | 0 |
| V\$TCF11_01       | TCF11/KCR-F1/Nrf1 homodimers                          | 6 | 0 | V\$NFMUE1_Q6      | NF-muE1                                             | 6 | 0 |
| V\$WHN_B          | winged-helix factor nude                              | 6 | 0 | MA0056.1          | MZF1_1-4                                            | 5 | 0 |
| MA0061.1          | NF-kappaB                                             | 5 | 0 | V\$MEIS1AHOXA9_01 | Meis-1a:HOXA9 heterodimeric binding                 | 5 | 0 |
| MA0138.2          | REST                                                  | 5 | 0 | V\$MIF1_01        | MIBP-1 / RFX1                                       | 5 | 0 |

|                   |                                      |   |   |  |                  |                                                                          |   |   |
|-------------------|--------------------------------------|---|---|--|------------------|--------------------------------------------------------------------------|---|---|
| MA0164.1          | Nr2e3                                | 5 | 0 |  | complex          |                                                                          |   |   |
| V\$E4F1_Q6        | E4F1                                 | 5 | 0 |  | V\$MYCMAX_03     | c-Myc:Max heterodimer                                                    | 5 | 0 |
| V\$EBF_Q6         | EBF                                  | 5 | 0 |  | V\$PBX_Q3        | Pbx                                                                      | 5 | 0 |
| V\$LTF_Q6         | LTF                                  | 5 | 0 |  | V\$RELB52_01     | kappaB site                                                              | 5 | 0 |
| V\$MAF_Q6         | MAF                                  | 5 | 0 |  | V\$TCF11_01      | TCF11/KCR-F1/Nrf1 homodimers                                             | 5 | 0 |
| V\$MAZR_01        | MAZ related factor                   | 5 | 0 |  | V\$TCF11MAFG_01  | TCF11:MafG heterodimers                                                  | 5 | 0 |
| V\$PAX3_B         | Pax-3 binding sites                  | 5 | 0 |  | V\$XBP1_01       | X-box-binding protein 1                                                  | 5 | 0 |
| V\$RELB52_01      | kappaB site                          | 5 | 0 |  | V\$AP1_Q2        | activator protein 1 activating                                           | 4 | 0 |
| V\$REX1_03        | REX1                                 | 5 | 0 |  | V\$ATF4_Q2       | transcription factor 4                                                   | 4 | 0 |
| MA0035.2          | Gata1                                | 4 | 0 |  | V\$HFH4_01       | HFH4 (FOXJ1)                                                             | 4 | 0 |
| MA0055.1          | Myf                                  | 4 | 0 |  | V\$MAZR_01       | MAZ related factor                                                       | 4 | 0 |
| MA0124.1          | NKX3-1                               | 4 | 0 |  | V\$MIZF_01       | MIZF                                                                     | 4 | 0 |
| F\$AMT1_Q2        | AMT1                                 | 4 | 0 |  | V\$NFKAPPAB65_01 | NF-kappaB (p65) neural-restrictive-silencer-element                      | 4 | 0 |
| V\$CLOCKBMAL_Q6   | CLOCK:BMAL                           | 4 | 0 |  | V\$NRSE_B        | neural-restrictive-silencer-element                                      | 4 | 0 |
| V\$HFH4_01        | HFH4 (FOXJ1)                         | 4 | 0 |  | V\$PAX3_B        | Pax-3 binding sites                                                      | 4 | 0 |
| V\$MEIS1BHOXA9_02 | Meis-1b:HOXA9 heterodimeric binding  | 4 | 0 |  | MA0035.2         | Gata1                                                                    | 3 | 0 |
| V\$MIF1_01        | MIBP-1 / RFX1 complex                | 4 | 0 |  | MA0059.1         | MYC::MAX                                                                 | 3 | 0 |
| V\$NFE2_01        | NF-E2 p45                            | 4 | 0 |  | MA0069.1         | Pax6                                                                     | 3 | 0 |
| V\$NRSE_B         | neural-restrictive-silencer-element  | 4 | 0 |  | F\$AMT1_Q2       | AMT1                                                                     | 3 | 0 |
| V\$PBX_Q3         | Pbx                                  | 4 | 0 |  | V\$AP1FJ_Q2      | activator protein 1                                                      | 3 | 0 |
| V\$TCF11MAFG_01   | TCF11:MafG heterodimers              | 4 | 0 |  | V\$DAX1_01       | Dax1                                                                     | 3 | 0 |
| V\$XBP1_01        | X-box-binding protein 1              | 4 | 0 |  | V\$DEAF1_01      | DEAF1                                                                    | 3 | 0 |
| V\$ZBED6_01       | ZBED6                                | 4 | 0 |  | V\$LBP1_Q6       | LBP-1                                                                    | 3 | 0 |
| V\$ZFX_01         | Zfx                                  | 4 | 0 |  | V\$MAF_Q6        | MAF                                                                      | 3 | 0 |
| V\$SMAD3_Q6       | SMAD3                                | 4 | 1 |  | V\$MZF1_01       | MZF1                                                                     | 3 | 0 |
| MA0057.1          | MZF1_5-13                            | 3 | 0 |  | V\$NGFIC_01      | nerve growth factor-induced protein C neuron-restrictive silencer factor | 3 | 0 |
| MA0059.1          | MYC::MAX                             | 3 | 0 |  | V\$NRSF_01       | neuron-restrictive silencer factor                                       | 3 | 0 |
| V\$DEAF1_02       | DEAF1                                | 3 | 0 |  | V\$PNR_01        | PNR                                                                      | 3 | 0 |
| V\$EGR3_01        | early growth response gene 3 product | 3 | 0 |  | V\$PXR_Q2        | half-site matrix                                                         | 3 | 0 |
| V\$MYB_Q5_01      | MYB                                  | 3 | 0 |  | V\$SOX17_01      | half-site                                                                | 3 | 0 |
|                   |                                      |   |   |  | MA0017.1         | NR2F1                                                                    | 2 | 0 |



|                     |                                                               |   |   |                |                                                               |   |   |
|---------------------|---------------------------------------------------------------|---|---|----------------|---------------------------------------------------------------|---|---|
| V\$MYOGNF1_01       | myogenin / nuclear factor 1 or related factors                | 3 | 0 | MA0057.1       | MZF1_5-13                                                     | 2 | 0 |
| V\$NFKAPPAB_01      | NF-kappaB                                                     | 3 | 0 | MA0061.1       | NF-kappaB                                                     | 2 | 0 |
| V\$NFMUE1_Q6        | NF-muE1                                                       | 3 | 0 | MA0067.1       | Pax2                                                          | 2 | 0 |
| V\$NGFIC_01         | nerve growth factor-induced protein C                         | 3 | 0 | MA0078.1       | Sox17                                                         | 2 | 0 |
| V\$P50RELAP65_Q5_01 | P50:RELA-P65                                                  | 3 | 0 | MA0138.2       | REST                                                          | 2 | 0 |
| V\$PXR_Q2           | half-site matrix                                              | 3 | 0 | V\$COUP_01     | COUP-TF, HNF-4                                                | 2 | 0 |
| V\$TITF1_Q3         | TTF-1, TITF1 (thyroid transcription factor 1)                 | 3 | 0 | V\$EBF_Q6      | EBF                                                           | 2 | 0 |
| MA0017.1            | NR2F1                                                         | 2 | 0 | V\$EGR2_01     | Egr-2/Krox-20 early growth response gene product              | 2 | 0 |
| MA0067.1            | Pax2                                                          | 2 | 0 | V\$FOXP1_01    | FOXP1                                                         | 2 | 0 |
| MA0069.1            | Pax6                                                          | 2 | 0 | V\$FXR_IR1_Q6  | FXR inverted repeat 1                                         | 2 | 0 |
| MA0078.1            | Sox17                                                         | 2 | 0 | V\$GFI1B_01    | Gfi1b                                                         | 2 | 0 |
| MA0104.2            | Mycn                                                          | 2 | 0 | V\$GZF1_01     | plays a role in renal branching morphogenesis                 | 2 | 0 |
| V\$BACH2_01         | BTB and CNC homolog 2                                         | 2 | 0 | V\$HAND1E47_01 | Hand1:E47                                                     | 2 | 0 |
| V\$COUP_01          | COUP-TF, HNF-4                                                | 2 | 0 | V\$LTF_Q6      | heterodimer                                                   | 2 | 0 |
| V\$DAX1_01          | Dax1                                                          | 2 | 0 | V\$LTF_Q6      | LTF                                                           | 2 | 0 |
| V\$DMRT3_01         | DMRT3                                                         | 2 | 0 | V\$NFKAPPAB_01 | NF-kappaB                                                     | 2 | 0 |
| V\$EGR2_01          | Egr-2/Krox-20 early growth response gene product              | 2 | 0 | V\$OLF1_01     | olfactory neuron-specific factor                              | 2 | 0 |
| V\$GFI1B_01         | Gfi1b                                                         | 2 | 0 | V\$PPARA_01    | PPAR:RXR heterodimers                                         | 2 | 0 |
| V\$MIZF_01          | MIZF                                                          | 2 | 0 | V\$PPARG_01    | PPAR-gamma (peroxisome proliferator-activated receptor gamma) | 2 | 0 |
| V\$MYCMAX_03        | c-Myc:Max heterodimer                                         | 2 | 0 | V\$TBX18_01    | T-box 18                                                      | 2 | 0 |
| V\$PNR_01           | PNR                                                           | 2 | 0 | V\$TITF1_Q3    | TTF-1, TITF1 (thyroid transcription factor 1)                 | 2 | 0 |
| V\$PPARA_01         | PPAR:RXR heterodimers                                         | 2 | 0 | V\$HMGA2_01    | HMGA2 binding site                                            | 2 | 0 |
| V\$PPARG_01         | PPAR-gamma (peroxisome proliferator-activated receptor gamma) | 2 | 0 | V\$BRACH_01    | Brachyury                                                     | 2 | 2 |
| V\$RORA_Q4          | RORalpha                                                      | 2 | 0 | MA0007.1       | Ar                                                            | 1 | 0 |
| V\$TBX18_01         | T-box 18                                                      | 2 | 0 | MA0048.1       | NHLH1                                                         | 1 | 0 |
| V\$ZNF219_01        | ZNF219                                                        | 2 | 0 | MA0100.1       | Myb                                                           | 1 | 0 |
|                     |                                                               |   |   | MA0104.2       | Mycn                                                          | 1 | 0 |

|                  |                                                                         |   |    |                  |                                                              |   |    |
|------------------|-------------------------------------------------------------------------|---|----|------------------|--------------------------------------------------------------|---|----|
| V\$CACD_01       | CACD                                                                    | 2 | 2  | MA0114.1         | HNF4A                                                        | 1 | 0  |
| V\$MOVOB_01      | MOV0-B                                                                  | 2 | 2  | MA0115.1         | NR1H2::RXRA<br>activating                                    | 1 | 0  |
| V\$RPC155_01     | RPC155                                                                  | 2 | 18 | V\$ATF6_01       | transcription factor 6<br>cut-like homeodomain               | 1 | 0  |
| MA0007.1         | Ar                                                                      | 1 | 0  | V\$CDPCR1_01     | protein<br>c-Myc heterodimer<br>(with a 26-29 kDa<br>factor) | 1 | 0  |
| MA0065.2         | PPARG::RXRA                                                             | 1 | 0  | V\$CMYC_02       |                                                              | 1 | 0  |
| MA0100.1         | Myb                                                                     | 1 | 0  | V\$DR3_Q4        | direct repeat 3<br>early growth response                     | 1 | 0  |
| MA0114.1         | HNF4A                                                                   | 1 | 0  | V\$EGR3_01       | gene 3 product<br>myogenin / nuclear<br>factor 1 or related  | 1 | 0  |
| MA0147.1         | Myc<br>aryl hydrocarbon<br>receptor:Arnt<br>heterodimers, fixed<br>core | 1 | 0  | V\$MYOGNF1_01    | factors                                                      | 1 | 0  |
| V\$AHRARNT_02    | activating<br>transcription factor 4<br>BTB and CNC homolog             | 1 | 0  | V\$NEUROD_02     | NeuroD                                                       | 1 | 0  |
| V\$ATF4_Q2       | 1                                                                       | 1 | 0  | V\$NMYC_01       | N-Myc                                                        | 1 | 0  |
| V\$BACH1_01      | C-MAF<br>c-Myc heterodimer<br>(with a 26-29 kDa<br>factor)              | 1 | 0  | V\$P50P50_Q3     | P50:P50                                                      | 1 | 0  |
| V\$CMAF_02       | FOXP1                                                                   | 1 | 0  | V\$P50RELAP65_Q5 | P50:RELA-P65                                                 | 1 | 0  |
| V\$CMYC_02       | FXR inverted repeat 1                                                   | 1 | 0  | V\$RORA_Q4       | RORalpha                                                     | 1 | 0  |
| V\$FOXP1_01      | Ikaros 3                                                                | 1 | 0  | V\$RXRLXRB_01    | RXR:LXR-beta                                                 | 1 | 0  |
| V\$FXR_IR1_Q6    | KAISO                                                                   | 1 | 0  | V\$SP3_Q3        | Sp3                                                          | 1 | 0  |
| V\$IK3_01        | NF-kappaB (p50)                                                         | 1 | 0  | V\$TAXCREB_02    | Tax/CREB complex                                             | 1 | 0  |
| V\$KAISO_01      | N-Myc<br>olfactory neuron-<br>specific factor                           | 1 | 0  | V\$ZBED6_01      | ZBED6                                                        | 1 | 0  |
| V\$NFKAPPAB50_01 | P50:P50                                                                 | 1 | 0  | V\$ZNF219_01     | ZNF219                                                       | 1 | 0  |
| V\$NMYC_01       | PEBP                                                                    | 1 | 0  | V\$SOX10_Q6      | SOX10                                                        | 1 | 2  |
| V\$OLF1_01       | RXR:LXR-beta                                                            | 1 | 0  | V\$P300_01       | p300                                                         | 1 | 3  |
| V\$P50P50_Q3     | Sp3                                                                     | 1 | 0  | V\$CMAF_02       | C-MAF                                                        | 1 | 9  |
| V\$PEBP_Q6       | Tax/CREB complex                                                        | 1 | 0  | V\$IK_Q5         | Ikaros                                                       | 1 | 22 |
| V\$RXRLXRB_01    | HMGA2 binding site                                                      | 1 | 0  | V\$RPC155_01     | RPC155                                                       | 1 | 22 |
| V\$SP3_Q3        | activator protein 4                                                     | 1 | 1  | MA0032.1         | FOXC1                                                        | 0 | 1  |
| V\$TAXCREB_02    | p63                                                                     | 1 | 1  | MA0073.1         | RREB1                                                        | 0 | 1  |
| VS\$HMGA2_01     |                                                                         |   |    | MA0116.1         | Zfp423                                                       | 0 | 1  |
| V\$AP4_Q6        |                                                                         |   |    | MA0141.1         | Esrrb                                                        | 0 | 1  |
| V\$P63_01        |                                                                         |   |    | MA0154.1         | EBF1                                                         | 0 | 1  |

|                         |                                                                            |   |    |                         |                                                                 |   |   |
|-------------------------|----------------------------------------------------------------------------|---|----|-------------------------|-----------------------------------------------------------------|---|---|
| V\$GCNF_01              | GCNF (germ cell nuclear factor)                                            | 1 | 2  | MA0159.1                | RXR::RAR_DR5 aryl hydrocarbon receptor:Arnt heterodimers        | 0 | 1 |
| V\$P300_01              | p300                                                                       | 1 | 2  | V\$AHRARNT_01           | AHRARNT heterodimers                                            | 0 | 1 |
| V\$TFIIH_Q6             | TFIIH                                                                      | 1 | 3  | V\$AHRHIF_Q6            | AhR, Arnt, HIF-1                                                | 0 | 1 |
| MA0089.1                | NFE2L1::MafG                                                               | 1 | 4  | V\$AML2_01              | AML2                                                            | 0 | 1 |
| V\$CACBINDINGPROTEIN_Q6 | CAC-binding protein                                                        | 1 | 5  | V\$AML_Q6               | AML BTB and CNC homolog                                         | 0 | 1 |
| V\$IK_Q5                | Ikaros                                                                     | 1 | 22 | V\$BACH1_01             | BACH1                                                           | 0 | 1 |
| V\$LYF1_01              | LyF-1                                                                      | 1 | 22 | V\$BRF1_01              | BRF-1                                                           | 0 | 1 |
| MA0002.2                | RUNX1                                                                      | 0 | 1  | V\$DBP_Q6               | DBP                                                             | 0 | 1 |
| MA0032.1                | FOXC1                                                                      | 0 | 1  | V\$DR1_Q3               | Direct repeat 1                                                 | 0 | 1 |
| MA0090.1                | TEAD1                                                                      | 0 | 1  | V\$GCNF_01              | GCNF (germ cell nuclear factor) Glucocorticoid response element | 0 | 1 |
| MA0106.1                | TP53                                                                       | 0 | 1  | V\$GRE_C                | GRE_C response element                                          | 0 | 1 |
| MA0141.1                | Esrrb                                                                      | 0 | 1  | V\$LXR_Q3               | LXR                                                             | 0 | 1 |
| MA0145.1                | Tcfcp2l1                                                                   | 0 | 1  | V\$PPAR_DR1_Q2          | PPAR direct repeat 1 RAR-related orphan receptor alpha2         | 0 | 1 |
| MA0442.1                | SOX10                                                                      | 0 | 1  | V\$RORA2_01             | RORA2 58 KDA repressor protein                                  | 0 | 1 |
| V\$AML_Q6               | AML                                                                        | 0 | 1  | V\$RP58_01              | RP58                                                            | 0 | 1 |
| V\$BRACH_01             | Brachyury                                                                  | 0 | 1  | V\$TAL1BETAE47_01       | Tal-1beta:E47 heterodimer                                       | 0 | 1 |
| V\$BRF1_01              | BRF-1                                                                      | 0 | 1  | V\$TAL1BETAITF2_01      | Tal-1beta:ITF-2 heterodimer                                     | 0 | 1 |
| V\$DBP_Q6               | DBP                                                                        | 0 | 1  | V\$ZID_01               | Zinc finger with interaction domain                             | 0 | 1 |
| V\$DR1_Q3               | Direct repeat 1                                                            | 0 | 1  | MA0090.1                | TEAD1                                                           | 0 | 2 |
| V\$HEN1_01              | HEN1 complex of Lmo2 bound to Tal-1, E2A proteins, and GATA-1, half-site 2 | 0 | 1  | MA0145.1                | Tcfcp2l1                                                        | 0 | 2 |
| V\$LMO2COM_02           | LMO2                                                                       | 0 | 1  | MA0150.1                | NFE2L2                                                          | 0 | 2 |
| V\$LXR_Q3               | LXR                                                                        | 0 | 1  | MA0155.1                | INSM1 aryl hydrocarbon / dioxin receptor                        | 0 | 2 |
| V\$MTERF_01             | mTERF binding site                                                         | 0 | 1  | V\$AHR_Q5               | AHR                                                             | 0 | 2 |
| V\$PAX_Q6               | Pax                                                                        | 0 | 1  | V\$CACD_01              | CACD                                                            | 0 | 2 |
| V\$PPAR_DR1_Q2          | PPAR direct repeat 1 Tal-1beta:E47 heterodimer                             | 0 | 1  | V\$COREBINDINGFACTOR_Q6 | core-binding factor                                             | 0 | 2 |
| V\$TAL1BETAE47_01       | Tal-1beta:E47 heterodimer                                                  | 0 | 1  | V\$HEN1_01              | HEN1                                                            | 0 | 2 |
| V\$TEF1_Q6              | TEF-1                                                                      | 0 | 1  | V\$MTF1_Q4              | MTF-1 BTB and CNC homolog                                       | 0 | 2 |
| MA0119.1                | TLX1::NFIC                                                                 | 0 | 2  | V\$BACH2_01             | BACH2                                                           | 0 | 3 |

|              |                                                                                   |   |   |                  |                                                                              |   |   |
|--------------|-----------------------------------------------------------------------------------|---|---|------------------|------------------------------------------------------------------------------|---|---|
| V\$CTF1_01   | selection of the binding sites for CTCF by HOX11 cooperative DNA binding [2]      | 0 | 2 | V\$CACCCBINDINGF |                                                                              |   |   |
| V\$ER_Q6_02  | half-site matrix, half-ERE                                                        | 0 | 2 | ACTOR_Q6         | CACCC-binding factor                                                         | 0 | 3 |
| V\$ERR2_01   | ERR2 (ESRRB)                                                                      | 0 | 2 | V\$SF1_Q6_01     | SF1                                                                          | 0 | 3 |
| V\$HEB_Q6    | HEB                                                                               | 0 | 2 |                  | sterol regulatory element-binding protein 1                                  | 0 | 3 |
| V\$AHR_01    | aryl hydrocarbon / dioxin receptor                                                | 0 | 3 | V\$SREBP1_01     | TEF-1                                                                        | 0 | 3 |
| V\$E47_01    | E47                                                                               | 0 | 3 | V\$TEF1_Q6       | TEF-1                                                                        | 0 | 3 |
|              | myoblast determination gene product                                               |   |   | MA0163.1         | PLAG1                                                                        | 0 | 4 |
| V\$MYOD_01   | 58 KDA repressor protein                                                          | 0 | 3 | V\$MOVVOB_01     | MOVVO-B                                                                      | 0 | 4 |
| V\$RP58_01   | Ras-responsive element binding protein 1                                          | 0 | 3 | V\$SMAD3_Q6      | SMAD3                                                                        | 0 | 4 |
| V\$RREB1_01  | SMAD4                                                                             | 0 | 3 | V\$TBX5_01       | TBX5                                                                         | 0 | 4 |
| V\$SMAD4_Q6  | SZF1-1                                                                            | 0 | 3 | MA0002.2         | RUNX1                                                                        | 0 | 5 |
| V\$SZF11_01  | zinc finger with interaction domain                                               | 0 | 3 | V\$AP4_Q5        | activator protein 4                                                          | 0 | 6 |
| V\$ZID_01    | PLAG1                                                                             | 0 | 4 | V\$SMAD4_Q6      | SMAD4                                                                        | 0 | 6 |
| MA0163.1     |                                                                                   |   |   | V\$SZF11_01      | SZF1-1                                                                       | 0 | 6 |
| V\$AHRHIF_Q6 | AhR, Arnt, HIF-1                                                                  | 0 | 4 | V\$TFII_Q6       | TFII-I                                                                       | 0 | 6 |
| V\$MTF1_Q4   | MTF-1                                                                             | 0 | 4 |                  | myoblast determination gene product                                          | 0 | 7 |
| V\$SPZ1_01   | spermatogenic Zip                                                                 | 0 | 5 | V\$MYOD_01       | product                                                                      | 0 | 7 |
| V\$TBX5_01   | TBX5                                                                              | 0 | 5 | V\$SPZ1_01       | spermatogenic Zip                                                            | 0 | 7 |
|              | vitamin D receptor; mediates vitamin D3-signaling, often dimerizes with RXR-alpha |   |   | MA0119.1         | TLX1::NFIC                                                                   | 0 | 8 |
| V\$VDR_Q3    | CP2                                                                               | 0 | 6 | MA0258.1         | ESR2                                                                         | 0 | 8 |
| V\$CP2_01    | LMAF                                                                              | 0 | 6 |                  | selection of the binding sites for CTCF by HOX11 cooperative DNA binding [2] | 0 | 8 |
| V\$LMAF_Q2   | E47:MATH1                                                                         | 0 | 6 | V\$CTF1_01       | DNA binding [2]                                                              | 0 | 8 |
| V\$MATH1_Q2  | ESR2                                                                              | 0 | 7 | V\$GCM_Q2        | GCM                                                                          | 0 | 8 |
| MA0258.1     | E12                                                                               | 0 | 7 |                  | heterodimers of CHOP and C/EBPalpha                                          | 0 | 9 |
| V\$E12_Q6    | HIC1                                                                              | 0 | 7 | V\$CHOP_01       | and C/EBPalpha                                                               | 0 | 9 |
| V\$HIC1_02   | SF1                                                                               | 0 | 7 | V\$E47_01        | E47                                                                          | 0 | 9 |
| V\$SF1_Q6_01 |                                                                                   |   |   |                  | half-site matrix, half-ERE                                                   | 0 | 9 |
|              |                                                                                   |   |   | V\$ER_Q6_02      | ERE                                                                          | 0 | 9 |
|              |                                                                                   |   |   | V\$HIC1_02       | HIC1                                                                         | 0 | 9 |
|              |                                                                                   |   |   | V\$Ikaros_01     | Ikaros 2                                                                     | 0 | 9 |
|              |                                                                                   |   |   | V\$LRF_Q2        | LRF                                                                          | 0 | 9 |

|                |                                                   |   |    |                             |                     |   |    |
|----------------|---------------------------------------------------|---|----|-----------------------------|---------------------|---|----|
| V\$CHOP_01     | heterodimers of CHOP<br>and C/EBPalpha            | 0 | 8  | V\$MEF2C_01                 | MEF-2C              | 0 | 9  |
| V\$GCM_Q2      | GCM                                               | 0 | 8  | V\$VDR_Q6                   | half-site matrix    | 0 | 9  |
| V\$LRF_Q2      | LRF                                               | 0 | 8  | V\$COUPTF_Q6                | COUPTF              | 0 | 10 |
| V\$SREBP1_01   | sterol regulatory<br>element-binding<br>protein 1 | 0 | 8  | V\$LRH1_Q5                  | LRH1                | 0 | 10 |
| V\$T3R_Q6      | half-site matrix                                  | 0 | 8  | MA0089.1                    | NFE2L1::MafG        | 0 | 11 |
| MA0092.1       | Hand1::Tcfe2a                                     | 0 | 9  | MA0112.2                    | ESR1                | 0 | 11 |
| MA0112.2       | ESR1                                              | 0 | 9  | V\$CACBINDINGPRO<br>TEIN_Q6 | CAC-binding protein | 0 | 11 |
| V\$COUPTF_Q6   | COUPTF                                            | 0 | 9  | V\$E12_Q6                   | E12                 | 0 | 11 |
| V\$IK2_01      | Ikaros 2                                          | 0 | 9  | V\$YY2                      | YY2                 | 0 | 11 |
| V\$LRH1_Q5     | LRH1                                              | 0 | 9  | V\$CP2_01                   | CP2                 | 0 | 12 |
| V\$RORBETA_Q2  | RORBETA                                           | 0 | 9  | V\$RORBETA_Q2               | RORBETA             | 0 | 12 |
| V\$EBOX_Q6_01  | Ebox                                              | 0 | 10 | V\$TBR2_01                  | TBR2                | 0 | 12 |
| V\$GLI3_01     | GLI3                                              | 0 | 10 | V\$HEB_Q6                   | HEB                 | 0 | 13 |
| V\$TFE_Q6      | TFE                                               | 0 | 10 | V\$LMAF_Q2                  | LMAF                | 0 | 13 |
| V\$YY2         | YY2                                               | 0 | 10 | MA0092.1                    | Hand1::Tcfe2a       | 0 | 14 |
| V\$SMAD_Q6     | SMAD                                              | 0 | 11 | MA0146.1                    | Zfx                 | 0 | 14 |
| V\$MEF2C_01    | MEF-2C                                            | 0 | 12 | V\$SMAD_Q6                  | SMAD                | 0 | 14 |
| V\$TBR2_01     | TBR2                                              | 0 | 12 | V\$TFE_Q6                   | TFE                 | 0 | 14 |
| V\$ZNF515_01   | Glis binding sites                                | 0 | 13 | MA0111.1                    | Spz1                | 0 | 15 |
| MA0111.1       | Spz1                                              | 0 | 14 | V\$GLI3_01                  | GLI3                | 0 | 15 |
| V\$GLI1_01     | GLI1                                              | 0 | 14 | V\$NURR1_Q3                 | NURR1               | 0 | 15 |
| V\$MYOGENIN_Q6 | myogenin                                          | 0 | 14 | V\$EBOX_Q6_01               | Ebox                | 0 | 16 |
| MA0161.1       | NFIC                                              | 0 | 15 | V\$HES1_Q2                  | HES1                | 0 | 16 |
| V\$HES1_Q2     | HES1                                              | 0 | 15 | V\$T3R_Q6                   | half-site matrix    | 0 | 16 |
| V\$NURR1_Q3    | NURR1                                             | 0 | 16 | MA0122.1                    | Nkx3-2              | 0 | 17 |
| V\$GLI2_01     | GLI2                                              | 0 | 17 | MA0160.1                    | NR4A2               | 0 | 17 |
| V\$OSF2_Q6     | Osf2                                              | 0 | 17 | V\$GLI1_01                  | GLI1                | 0 | 17 |
| V\$TTF1_Q6     | TTF-1 (Nkx2-1)                                    | 0 | 17 | V\$MATH1_Q2                 | E47:MATH1           | 0 | 17 |
| V\$USF2_Q6     | USF2                                              | 0 | 17 | V\$TTF1_Q6                  | TTF-1 (Nkx2-1)      | 0 | 17 |
| MA0122.1       | Nkx3-2                                            | 0 | 18 | V\$USF2_Q6                  | USF2                | 0 | 17 |
| V\$DEC_Q1      | DEC                                               | 0 | 18 | V\$GLI2_01                  | GLI2                | 0 | 18 |
| V\$PUR1_Q4     | PUR1                                              | 0 | 18 | V\$SREBP_Q3                 | SREBP               | 0 | 18 |
| V\$SREBP_Q3    | SREBP                                             | 0 | 18 | V\$OSF2_Q6                  | Osf2                | 0 | 19 |
| MA0160.1       | NR4A2                                             | 0 | 19 | V\$ZNF515_01                | Glis binding sites  | 0 | 19 |

|                |                                                              |   |    |
|----------------|--------------------------------------------------------------|---|----|
| V\$GLI_Q2      | GLI                                                          | 0 | 19 |
| MA0146.1       | Zfx                                                          | 0 | 20 |
| V\$DELTAEF1_01 | deltaEF1                                                     | 0 | 20 |
| V\$E2A_Q2      | E2A                                                          | 0 | 20 |
| V\$MAFA_Q4_01  | MAFA                                                         | 0 | 20 |
| MA0103.1       | ZEB1                                                         | 0 | 21 |
| V\$AML1_01     | runt-factor AML-1                                            | 0 | 21 |
| V\$LFA1_Q6     | LF-A1                                                        | 0 | 21 |
| MA0019.1       | Ddit3::Cebpa<br>2 ERE half-sites with a<br>3bp spacer within | 0 | 22 |
| V\$ERALPHA_01  | MAFB                                                         | 0 | 22 |
| V\$TERALPHA_Q6 | TERALPHA<br>zinc finger protein of<br>the cerebellum 1       | 0 | 22 |
| V\$ZIC1_01     | zinc finger protein of<br>the cerebellum 3                   | 0 | 22 |
| V\$ZIC3_01     | ZNF354C                                                      | 0 | 23 |
| MA0130.1       | ZNF354C                                                      | 0 | 23 |
| V\$AP2REP_01   | AP-2 repressor<br>apolipoprotein AI<br>regulatory protein 1  | 0 | 23 |
| V\$ARP1_01     | BDP1                                                         | 0 | 23 |
| V\$BDP1_01     | GTF2IRD1-isoform2                                            | 0 | 23 |
| V\$GTF2IRD1_01 | ING4                                                         | 0 | 23 |
| V\$ING4_01     | Kid3                                                         | 0 | 23 |
| V\$KID3_01     | LUN-1                                                        | 0 | 23 |
| V\$LUN1_01     | SREBP2<br>zinc finger protein of<br>the cerebellum 2         | 0 | 23 |
| V\$SREBP2_Q6   | V\$ZIC2_01                                                   | 0 | 23 |

|                                            |                                                                                       |   |    |
|--------------------------------------------|---------------------------------------------------------------------------------------|---|----|
| V\$DEC_Q1                                  | DEC                                                                                   | 0 | 20 |
| V\$DELTAEF1_01                             | deltaEF1                                                                              | 0 | 20 |
| V\$GLI_Q2                                  | GLI<br>complex of Lmo2<br>bound to Tal-1, E2A<br>proteins, and GATA-1,<br>half-site 1 | 0 | 20 |
| V\$LMO2COM_01                              | Ddit3::Cebpa                                                                          | 0 | 21 |
| MA0019.1                                   | ZEB1                                                                                  | 0 | 21 |
| MA0103.1                                   | NFIC<br>zinc finger protein of<br>the cerebellum 1                                    | 0 | 21 |
| MA0161.1                                   | apolipoprotein AI<br>regulatory protein 1                                             | 0 | 22 |
| V\$ZIC1_01                                 | BDP1                                                                                  | 0 | 22 |
| V\$ARP1_01                                 | E2A<br>2 ERE half-sites with a<br>3bp spacer within                                   | 0 | 22 |
| V\$BDP1_01                                 | V\$ERALPHA_01                                                                         | 0 | 22 |
| V\$E2A_Q2                                  | LUN-1                                                                                 | 0 | 22 |
| V\$ERALPHA_01                              | LyF-1                                                                                 | 0 | 22 |
| V\$LUN1_01                                 | MAFA                                                                                  | 0 | 22 |
| V\$LYF1_01                                 | myogenin                                                                              | 0 | 22 |
| V\$MAFA_Q4_01                              | V\$TERALPHA_Q6                                                                        | 0 | 22 |
| V\$MYOGENIN_Q6                             | MA0130.1                                                                              | 0 | 23 |
| V\$TERALPHA_Q6                             | ZNF354C                                                                               | 0 | 23 |
| MA0130.1                                   | V\$AML1_01                                                                            | 0 | 23 |
| ZNF354C                                    | V\$AP2REP_01                                                                          | 0 | 23 |
| V\$AML1_01                                 | V\$GTF2IRD1_01                                                                        | 0 | 23 |
| runt-factor AML-1                          | V\$ING4_01                                                                            | 0 | 23 |
| V\$AP2REP_01                               | V\$KID3_01                                                                            | 0 | 23 |
| AP-2 repressor                             | V\$LFA1_Q6                                                                            | 0 | 23 |
| GTF2IRD1-isoform2                          | V\$MAFB_01                                                                            | 0 | 23 |
| ING4                                       | V\$PUR1_Q4                                                                            | 0 | 23 |
| Kid3                                       | V\$SREBP2_Q6                                                                          | 0 | 23 |
| LUN-1                                      | V\$ZIC2_01                                                                            | 0 | 23 |
| SREBP2                                     | V\$ZIC3_01                                                                            | 0 | 23 |
| zinc finger protein of<br>the cerebellum 2 |                                                                                       |   |    |
| zinc finger protein of<br>the cerebellum 3 |                                                                                       |   |    |
