# Supplementary material
Source: PubMed Central journal article supplement (PMC4076396)
Supplement: supp_113.110403_110403SupTabS4.pdf [file supp_113.110403_110403SupTabS4.pdf]

**Supplemental Table S4.** Clover results indicate the number of chromosomes with transcription factor binding motifs statistically over- or under-represented in HEE DHS within intergenic sequence (more than 2kb outside of any gene). Analysis was divided into three groups (all DHS, HEE-selective DHS, and ubiquitous DHS).

| All Intergenic DHS |                     |        |        | Epid-selective Intergenic DHS |                                                          |        |        | Ubiquitous Intergenic DHS |                                                                       |        |        |
|--------------------|---------------------|--------|--------|-------------------------------|----------------------------------------------------------|--------|--------|---------------------------|-----------------------------------------------------------------------|--------|--------|
| Matrix ID          | Gene Symbol         | p<0.01 | p>0.99 | Matrix ID                     | Gene Symbol                                              | p<0.01 | p>0.99 | Matrix ID                 | Gene Symbol                                                           | p<0.01 | p>0.99 |
| MA0002.2           | RUNX1               | 23     | 0      | MA0002.2                      | RUNX1                                                    | 23     | 0      | MA0003.1                  | TFAP2A                                                                | 23     | 0      |
| MA0003.1           | TFAP2A              | 23     | 0      | MA0046.1                      | HNF1A                                                    | 23     | 0      | MA0068.1                  | Pax4                                                                  | 23     | 0      |
| MA0046.1           | HNF1A               | 23     | 0      | MA0067.1                      | Pax2                                                     | 23     | 0      | MA0080.2                  | SPI1                                                                  | 23     | 0      |
| MA0055.1           | Myf                 | 23     | 0      | MA0090.1                      | TEAD1                                                    | 23     | 0      | MA0081.1                  | SPIB                                                                  | 23     | 0      |
| MA0080.2           | SPI1                | 23     | 0      | MA0099.2                      | AP1                                                      | 23     | 0      | MA0098.1                  | ETS1                                                                  | 23     | 0      |
| MA0081.1           | SPIB                | 23     | 0      | MA0150.1                      | NFE2L2                                                   | 23     | 0      | MA0139.1                  | CTCF                                                                  | 23     | 0      |
| MA0089.1           | NFE2L1::MafG        | 23     | 0      | MA0153.1                      | HNF1B                                                    | 23     | 0      | MA0154.1                  | EBF1                                                                  | 23     | 0      |
| MA0090.1           | TEAD1               | 23     | 0      | V\$AP1FJ_Q2                   | activator protein 1<br>BTB and CNC homolog               | 23     | 0      | V\$ALX3_01                | ALX-3                                                                 | 23     | 0      |
| MA0098.1           | ETS1                | 23     | 0      | V\$BACH1_01                   | 1<br>BTB and CNC homolog                                 | 23     | 0      | V\$ALX4_02                | Alx-4<br>myocyte enhancer                                             | 23     | 0      |
| MA0099.2           | AP1                 | 23     | 0      | V\$BACH2_01                   | 2                                                        | 23     | 0      | V\$AMEF2_Q6               | factor                                                                | 23     | 0      |
| MA0101.1           | REL                 | 23     | 0      | V\$CMAF_Q2                    | C-MAF                                                    | 23     | 0      | V\$AP2_Q6_01              | AP-2                                                                  | 23     | 0      |
| MA0107.1           | RELA                | 23     | 0      | V\$ELF1_Q5                    | ELF1                                                     | 23     | 0      | V\$AP2ALPHA_01            | AP-2alpha<br>AREB6 (Atp1a1<br>regulatory element<br>binding factor 6) | 23     | 0      |
| MA0136.1           | ELF5                | 23     | 0      | V\$ETS2_Q6                    | ETS2                                                     | 23     | 0      | V\$AREB6_04               |                                                                       | 23     | 0      |
| MA0137.2           | STAT1               | 23     | 0      | V\$ETS_Q4                     | Ets                                                      | 23     | 0      | V\$ARX_01                 | Arx                                                                   | 23     | 0      |
| MA0139.1           | CTCF                | 23     | 0      | V\$FRA1_Q5                    | FRA1                                                     | 23     | 0      | V\$BARHL1_01              | Barhl-1                                                               | 23     | 0      |
| MA0144.1           | Stat3               | 23     | 0      | V\$HEB_Q6                     | HEB<br>hepatic nuclear factor                            | 23     | 0      | V\$BARHL2_01              | Barhl2                                                                | 23     | 0      |
| MA0150.1           | NFE2L2              | 23     | 0      | V\$HNF1_01                    | 1                                                        | 23     | 0      | V\$BARX1_01               | Barx1                                                                 | 23     | 0      |
| MA0152.1           | NFATC2              | 23     | 0      | V\$LMAF_Q2                    | LMAF                                                     | 23     | 0      | V\$BARX2_01               | Barx-2                                                                | 23     | 0      |
| MA0153.1           | HNF1B               | 23     | 0      | V\$MAFA_Q4_01                 | MAFA                                                     | 23     | 0      | V\$BEN_01                 | BEN                                                                   | 23     | 0      |
| MA0154.1           | EBF1                | 23     | 0      | V\$MAFB_01                    | MAFB                                                     | 23     | 0      | V\$BRN3C_01               | Brn-3c                                                                | 23     | 0      |
| MA0156.1           | FEV                 | 23     | 0      | V\$NEUROD_Q2                  | NeuroD                                                   | 23     | 0      | V\$BRN4_01                | Brn-4                                                                 | 23     | 0      |
| F\$AMT1_Q2         | AMT1                | 23     | 0      | V\$NF1_Q6                     | nuclear factor 1                                         | 23     | 0      | V\$BSX_01                 | Bsx                                                                   | 23     | 0      |
| V\$ALX3_01         | ALX-3               | 23     | 0      | V\$NFE2_01                    | NF-E2 p45<br>heterodimer                                 | 23     | 0      | V\$CART1_Q2               | CART1                                                                 | 23     | 0      |
| V\$AP1FJ_Q2        | activator protein 1 | 23     | 0      | V\$NRF2_Q4                    | containing Nrf2<br>signal transducer and<br>activator of | 23     | 0      | V\$CDP_Q3                 | CDP                                                                   | 23     | 0      |
| V\$AP2_Q6_01       | AP-2                | 23     | 0      | V\$STAT6_Q2                   | transcription 6                                          | 23     | 0      | V\$CDX1_Q1                | Cdx-1                                                                 | 23     | 0      |
| V\$AP2ALPHA_01     | AP-2alpha           | 23     | 0      | V\$TEF_Q1                     | TEF b.s.                                                 | 23     | 0      | V\$CDX2_Q1                | Cdx-2                                                                 | 23     | 0      |
| V\$AP2GAMMA_01     | AP-2gamma           | 23     | 0      | V\$TR4_Q1                     | TR4                                                      | 23     | 0      | V\$CEBP_Q2                | CCAAT/enhancer<br>binding factor                                      | 23     | 0      |
| V\$AP4_Q1          | activator protein 4 | 23     | 0      | MA0080.2                      | SPI1                                                     | 22     | 0      | V\$CEBPA_Q1               | CCAAT/enhancer                                                        | 23     | 0      |

|                          |                       |    |   |                          |                                                     |    |   | binding protein alpha |                                                       |    |   |
|--------------------------|-----------------------|----|---|--------------------------|-----------------------------------------------------|----|---|-----------------------|-------------------------------------------------------|----|---|
| V\$AR_Q6                 | half-site matrix      | 23 | 0 | MA0081.1                 | SPIB                                                | 22 | 0 | V\$DBX1_01            | Dbx-1                                                 | 23 | 0 |
| V\$BACH1_01              | BTB and CNC homolog 1 | 23 | 0 | MA0089.1                 | NFE2L1::MafG                                        | 22 | 0 | V\$DBX2_01            | Dbx-2                                                 | 23 | 0 |
| V\$BACH2_01              | BTB and CNC homolog 2 | 23 | 0 | MA0098.1                 | ETS1                                                | 22 | 0 | V\$DLX1_01            | Dlx-1                                                 | 23 | 0 |
| V\$BARHL2_01             | Barhl2                | 23 | 0 | MA0136.1                 | ELF5                                                | 22 | 0 | V\$DLX2_01            | Dlx-2                                                 | 23 | 0 |
| V\$BARX2_01              | Barx-2                | 23 | 0 | MA0156.1                 | FEV                                                 | 22 | 0 | V\$DLX3_01            | dlx3                                                  | 23 | 0 |
| V\$BEN_01                | BEN                   | 23 | 0 | V\$AP4_Q5                | activator protein 4                                 | 22 | 0 | V\$DLX5_01            | dlx5                                                  | 23 | 0 |
| V\$BLIMP1_Q6             | BLIMP1                | 23 | 0 | V\$SCOREBINDINGFACTOR_Q6 | core-binding factor                                 | 22 | 0 | V\$DLX7_01            | Dlx7                                                  | 23 | 0 |
| V\$BRN3C_01              | Brn-3c                | 23 | 0 | V\$LBP1_Q6               | LBP-1                                               | 22 | 0 | V\$DOBOX4_01          | Dobox4                                                | 23 | 0 |
| V\$BRN4_01               | Brn-4                 | 23 | 0 | V\$MAF_Q6_01             | MAF                                                 | 22 | 0 | V\$DOBOX5_01          | Dobox5                                                | 23 | 0 |
| V\$CART1_03              | CART1                 | 23 | 0 | V\$NERF_Q2               | new ets-related factor 1a                           | 22 | 0 | V\$E2F1_01            | E2F1                                                  | 23 | 0 |
| V\$CDX1_01               | Cdx-1                 | 23 | 0 | V\$PU1_Q6                | PU.1                                                | 22 | 0 | V\$E2F6_01            | E2F6                                                  | 23 | 0 |
| V\$CDX2_01               | Cdx-2                 | 23 | 0 | V\$STAT3_02              | signal transducer and activator of transcription 3  | 22 | 0 | V\$ELF1_Q5            | ELF1                                                  | 23 | 0 |
| V\$CETS1P54_01           | c-Ets-1(p54)          | 23 | 0 | V\$STAT4_01              | signal transducer and activator of transcription 4  | 22 | 0 | V\$EMX2_01            | EMX2                                                  | 23 | 0 |
| V\$CKROX_Q2              | CKROX                 | 23 | 0 | V\$TEF1_Q6               | TEF-1                                               | 22 | 0 | V\$EN1_02             | En-1                                                  | 23 | 0 |
| V\$CMAF_Q2               | C-MAF                 | 23 | 0 | V\$AML1_01               | runt-factor AML-1                                   | 21 | 0 | V\$EN2_01             | En-2                                                  | 23 | 0 |
| V\$SCOREBINDINGFACTOR_Q6 | core-binding factor   | 23 | 0 | V\$AML2_01               | AML2                                                | 21 | 0 | V\$ESX1_01            | Esx1                                                  | 23 | 0 |
| V\$CREL_01               | c-Rel                 | 23 | 0 | V\$AML_Q6                | AML                                                 | 21 | 0 | V\$ETS2_Q6            | ETS2                                                  | 23 | 0 |
| V\$DBX1_01               | Dbx-1                 | 23 | 0 | V\$ESE1_Q3               | ESE1                                                | 21 | 0 | V\$ETS_Q4             | Ets                                                   | 23 | 0 |
| V\$DBX2_01               | Dbx-2                 | 23 | 0 | V\$GABPALPHA_Q4          | GABP-alpha                                          | 21 | 0 | V\$EVX1_01            | Evx-1                                                 | 23 | 0 |
| V\$E12_Q6                | E12                   | 23 | 0 | V\$MATH1_Q2              | E47:MATH1                                           | 21 | 0 | V\$FPM315_01          | Zinc finger protein FPM315 with KRAB and SCAN domains | 23 | 0 |
| V\$E2F1_01               | E2F1                  | 23 | 0 | V\$MYOGENIN_Q6           | myogenin                                            | 21 | 0 | V\$GABPALPHA_Q4       | GABP-alpha                                            | 23 | 0 |
| V\$E2F6_01               | E2F6                  | 23 | 0 | V\$OSF2_Q6               | Osf2                                                | 21 | 0 | V\$GBX1_01            | Gbx1                                                  | 23 | 0 |
| V\$EAR2_Q2               | EAR2                  | 23 | 0 | V\$PUR1_Q4               | PUR1                                                | 21 | 0 | V\$GBX2_01            | Gbx2                                                  | 23 | 0 |
| V\$EBF_Q6                | EBF                   | 23 | 0 | V\$STAT5A_Q3             | signal transducer and activator of transcription 5a | 21 | 0 | V\$GSC_01             | Gsc                                                   | 23 | 0 |
| V\$ELF1_Q5               | ELF1                  | 23 | 0 | V\$TEL2_Q6               | Tel-2                                               | 21 | 0 | V\$GSH2_01            | GSH2                                                  | 23 | 0 |
| V\$ELK1_01               | Elk-1                 | 23 | 0 | MA0119.1                 | TLX1::NFIC                                          | 20 | 0 | V\$HB24_01            | HB24                                                  | 23 | 0 |
| V\$ESE1_Q3               | ESE1                  | 23 | 0 | MA0144.1                 | Stat3                                               | 20 | 0 | V\$HB9_01             | HB9                                                   | 23 | 0 |
| V\$ESX1_01               | Esx1                  | 23 | 0 | MA0161.1                 | NFIC                                                | 20 | 0 | V\$HDX_01             | Hdx                                                   | 23 | 0 |
| V\$ETS2_B                | c-Ets-2 binding sites | 23 | 0 | V\$AP2REP_01             | AP-2 repressor                                      | 20 | 0 | V\$HEB_Q6             | HEB                                                   | 23 | 0 |
| V\$ETS_Q4                | Ets                   | 23 | 0 | V\$AR_Q6                 | half-site matrix                                    | 20 | 0 | V\$HMBBOX1_01         | Hmbbox1                                               | 23 | 0 |

|                 |                                                       |    |   |                 |                                                                              |    |   |              |            |    |   |
|-----------------|-------------------------------------------------------|----|---|-----------------|------------------------------------------------------------------------------|----|---|--------------|------------|----|---|
| V\$FLI1_Q6      | FLI1                                                  | 23 | 0 | V\$CTF1_01      | selection of the binding sites for CTCF by HOX11 cooperative DNA binding [2] | 20 | 0 | V\$HMG1Y_Q3  | HMG1Y      | 23 | 0 |
| V\$FPM315_01    | Zinc finger protein FPM315 with KRAB and SCAN domains | 23 | 0 | V\$PEBP_Q6      | PEBP                                                                         | 20 | 0 | V\$HMX1_02   | HMX1       | 23 | 0 |
| V\$FRA1_Q5      | FRA1                                                  | 23 | 0 | MA0092.1        | Hand1::Tcf2a                                                                 | 19 | 0 | V\$HMX3_02   | Nkx5-1     | 23 | 0 |
| V\$GABPALPHA_Q4 | GABP-alpha                                            | 23 | 0 | F\$AMT1_Q2      | AMT1                                                                         | 19 | 0 | V\$HNF1_02   | HNF-1alpha | 23 | 0 |
| V\$GAF_Q6       | GAF                                                   | 23 | 0 | V\$E2A_Q6       | E2A                                                                          | 19 | 0 | V\$HNF1B_01  | HNF-1beta  | 23 | 0 |
| V\$HB24_01      | HB24                                                  | 23 | 0 | V\$LTF_Q6       | LTF                                                                          | 19 | 0 | V\$HOMEZ_01  | Homez      | 23 | 0 |
| V\$HEB_Q6       | HEB                                                   | 23 | 0 | V\$NFAT2_Q5     | NF-AT2                                                                       | 19 | 0 | V\$HOX13_02  | HOXA5      | 23 | 0 |
| V\$HMX3_02      | Nkx5-1 hepatic nuclear factor                         | 23 | 0 | V\$SMAD3_Q6     | SMAD3                                                                        | 19 | 0 | V\$HOXA10_01 | HOXA10     | 23 | 0 |
| V\$HNF1_01      | 1                                                     | 23 | 0 | V\$SOX9_Q4      | SOX9 signal transducer and activator of transcription 1                      | 19 | 0 | V\$HOXA11_01 | HOXA11     | 23 | 0 |
| V\$HOXA10_01    | HOXA10                                                | 23 | 0 | V\$STAT1_03     | STAT1                                                                        | 19 | 0 | V\$HOXA13_02 | HOXA13     | 23 | 0 |
| V\$HOXA4_01     | HOXA4                                                 | 23 | 0 | V\$TAL1_Q6      | TAL1                                                                         | 19 | 0 | V\$HOXA1_01  | HOXA1      | 23 | 0 |
| V\$HOXA6_01     | HOXA6                                                 | 23 | 0 | V\$TCF11_01     | TCF11/KCR-F1/Nrf1 homodimers                                                 | 19 | 0 | V\$HOXA2_01  | HoxA2      | 23 | 0 |
| V\$HOXA7_02     | HOXA7                                                 | 23 | 0 | V\$FLI1_Q6      | FLI1 homeobox transcription factor                                           | 18 | 0 | V\$HOXA3_02  | HOXA3      | 23 | 0 |
| V\$HOXA9_01     | hoxa9                                                 | 23 | 0 | V\$IPF1_05      | Pdx-1                                                                        | 18 | 0 | V\$HOXA4_01  | HOXA4      | 23 | 0 |
| V\$HOXB4_01     | HOXB4                                                 | 23 | 0 | V\$PEA3_Q6      | PEA3                                                                         | 18 | 0 | V\$HOXA6_01  | HOXA6      | 23 | 0 |
| V\$HOXB8_01     | HOXB8                                                 | 23 | 0 | MA0117.1        | Mafk                                                                         | 17 | 0 | V\$HOXA7_02  | HOXA7      | 23 | 0 |
| V\$HOXB9_01     | HOXB9                                                 | 23 | 0 | MA0138.2        | REST                                                                         | 17 | 0 | V\$HOXA9_01  | hoxa9      | 23 | 0 |
| V\$HOXC4_01     | HOXC4                                                 | 23 | 0 | V\$CEBP_01      | CCAAT/enhancer binding protein                                               | 17 | 0 | V\$HOXB13_01 | HOXB13     | 23 | 0 |
| V\$HOXC5_01     | HOXC5                                                 | 23 | 0 | V\$PAX8_B       | Pax-8 binding sites                                                          | 17 | 0 | V\$HOXB3_01  | HOXB3      | 23 | 0 |
| V\$HOXC6_01     | HOXC6                                                 | 23 | 0 | V\$SMAD4_Q6     | SMAD4                                                                        | 17 | 0 | V\$HOXB4_01  | HOXB4      | 23 | 0 |
| V\$HOXC9_01     | HOXC9                                                 | 23 | 0 | V\$TCF11MAFG_01 | TCF11:MafG heterodimers                                                      | 17 | 0 | V\$HOXB5_01  | HoxB5      | 23 | 0 |
| V\$HOXD8_01     | HOXD8                                                 | 23 | 0 | MA0154.1        | EBF1                                                                         | 16 | 0 | V\$HOXB6_01  | HOXB6      | 23 | 0 |
| V\$ICSBP_Q6     | ICSBP homeobox transcription factor                   | 23 | 0 | V\$ALPHACP1_01  | alpha-CP1                                                                    | 16 | 0 | V\$HOXB7_01  | HOXB7      | 23 | 0 |
| V\$IPF1_05      | Pdx-1                                                 | 23 | 0 | V\$GR_Q6_01     | half-site matrix                                                             | 16 | 0 | V\$HOXB8_01  | HOXB8      | 23 | 0 |
| V\$IRF3_Q3      | IRF3                                                  | 23 | 0 | V\$HNF4_Q6_03   | half-site 2                                                                  | 16 | 0 | V\$HOXB9_01  | HOXB9      | 23 | 0 |
| V\$IRF_Q6       | IRF                                                   | 23 | 0 | V\$NFAT_Q4_01   | NF-AT                                                                        | 16 | 0 | V\$HOXC10_01 | HOXC10     | 23 | 0 |
| V\$K2B_01       | K-2b                                                  | 23 | 0 | V\$STAT_Q6      | STAT                                                                         | 16 | 0 | V\$HOXC11_01 | HOXC11     | 23 | 0 |
| V\$KAISO_01     | KAISO                                                 | 23 | 0 | V\$T3R_Q6       | half-site matrix                                                             | 16 | 0 | V\$HOXC12_01 | HOXC12     | 23 | 0 |
| V\$LBP1_Q6      | LBP-1                                                 | 23 | 0 | V\$CEBPB_01     | CCAAT/enhancer binding protein beta                                          | 15 | 0 | V\$HOXC13_01 | HOXC13     | 23 | 0 |

|                  |                                                    |       |    |                |                                                                     |                 |    |              |                                           |        |    |   |
|------------------|----------------------------------------------------|-------|----|----------------|---------------------------------------------------------------------|-----------------|----|--------------|-------------------------------------------|--------|----|---|
| V\$LFA1_Q6       | LF-A1                                              | 23    | 0  | V\$E2F1_01     | E2F1                                                                | 15              | 0  | V\$HOXC4_01  | HOXC4                                     | 23     | 0  |   |
| V\$LHX3_02       | Lhx3                                               | 23    | 0  | V\$EBF_Q6      | EBF                                                                 | 15              | 0  | V\$HOXC5_01  | HOXC5                                     | 23     | 0  |   |
| V\$LHX5_01       | Lhx5                                               | 23    | 0  | V\$EBOX_Q6_01  | Ebox<br>Zinc finger protein<br>FPM315 with KRAB<br>and SCAN domains | 15              | 0  | V\$HOXC6_01  | HOXC6                                     | 23     | 0  |   |
| V\$LHX9_01       | Lhx9                                               | 23    | 0  | V\$FPM315_01   |                                                                     | 15              | 0  | V\$HOXC8_01  | HOXC-8                                    | 23     | 0  |   |
| V\$LIM1_01       | Lim-1                                              | 23    | 0  | V\$NFAT1_Q6    | NFAT1                                                               | 15              | 0  | V\$HOXC9_01  | HOXC9                                     | 23     | 0  |   |
| V\$LMAF_Q2       | LMAF                                               | 23    | 0  | V\$NFAT3_Q3    | NFAT3<br>neuron-restrictive<br>silencer factor                      | 15              | 0  | V\$HOXD10_01 | HOXD10                                    | 23     | 0  |   |
| V\$LMX1_01       | Lmx-1                                              | 23    | 0  | V\$NRSF_01     |                                                                     | 15              | 0  | V\$HOXD11_01 | HOXD11                                    | 23     | 0  |   |
| V\$LMX1B_01      | lmx1b                                              | 23    | 0  | MA0055.1       | Myf                                                                 | 14              | 0  | V\$HOXD12_01 | HOXD12                                    | 23     | 0  |   |
| V\$LTF_Q6        | LTF                                                | 23    | 0  | V\$CTCF_02     | CCCTC-binding factor                                                | 14              | 0  | V\$HOXD13_01 | HOXD13                                    | 23     | 0  |   |
| V\$MAFB_01       | MAFB                                               | 23    | 0  | V\$MAZ_Q6      | MAZ<br>myoblast determining<br>factor                               | 14              | 0  | V\$HOXD1_01  | HOXD1                                     | 23     | 0  |   |
| V\$MATH1_Q2      | E47:MATH1                                          | 23    | 0  | V\$MYOD_Q6     |                                                                     | 14              | 0  | V\$HOXD3_01  | HOXD3                                     | 23     | 0  |   |
| V\$MAZ_Q6        | MAZ                                                | 23    | 0  | V\$PPARG_Q6    | half-site                                                           | 14              | 0  | V\$HOXD8_01  | HOXD8<br>homeobox<br>transcription factor | 23     | 0  |   |
| V\$MSX1_02       | Msx-1                                              | 23    | 0  | V\$RORBETA_Q2  | RORBETA                                                             | 14              | 0  | V\$IPF1_05   | Pdx-1                                     | 23     | 0  |   |
| V\$MSX3_01       | Msx-3<br>myoblast<br>determination gene<br>product | 23    | 0  | V\$SOX_01      | SOX                                                                 | 14              | 0  | V\$IRF3_Q3   | IRF3                                      | 23     | 0  |   |
| V\$MYOD_01       |                                                    | 23    | 0  | V\$SREBP2_Q6   | SREBP2                                                              | 14              | 0  | V\$IRF_Q6    | IRF                                       | 23     | 0  |   |
| V\$NCX_02        | Ncx<br>new ets-related factor<br>1a                | 23    | 0  | V\$BLIMP1_Q6   | BLIMP1                                                              | 13              | 0  | V\$IRX2_01   | Irx2                                      | 23     | 0  |   |
| V\$NERF_Q2       |                                                    | 23    | 0  | V\$CEBPE_01    | cebpe                                                               | 13              | 0  | V\$IRX3_01   | Irx-3                                     | 23     | 0  |   |
| V\$NEUROD_02     | NeuroD                                             | 23    | 0  | V\$CETS1P54_01 | c-Ets-1(p54)                                                        | 13              | 0  | V\$IRX4_01   | IRX4                                      | 23     | 0  |   |
| V\$NF1_Q6        | nuclear factor 1                                   | 23    | 0  | V\$DR1_Q3      | Direct repeat 1                                                     | 13              | 0  | V\$IRX5_01   | Irx5                                      | 23     | 0  |   |
| V\$NFAT1_Q6      | NFAT1                                              | 23    | 0  | V\$KAISO_01    | KAISO<br>nuclear factor Y (Y-<br>box binding factor)                | 13              | 0  | V\$IRXB3_01  | IRXB3                                     | 23     | 0  |   |
| V\$NFAT2_Q5      | NF-AT2                                             | 23    | 0  | V\$NFY_Q6      |                                                                     | 13              | 0  | V\$ISL2_01   | Isl2                                      | 23     | 0  |   |
| V\$NFAT_Q4_01    | NF-AT                                              | 23    | 0  | V\$PAX_Q6      | Pax                                                                 | 13              | 0  | V\$ISX_01    | isx                                       | 23     | 0  |   |
| V\$NFE2_01       | NF-E2 p45                                          | 23    | 0  | V\$PXR_Q2      | half-site matrix                                                    | 13              | 0  | V\$K2B_01    | K-2b                                      | 23     | 0  |   |
| V\$NFKAPPAB65_01 | NF-kappaB (p65)                                    | 23    | 0  | V\$SMAD_Q6_01  | SMAD                                                                | 13              | 0  | V\$LBP1_Q6   | LBP-1                                     | 23     | 0  |   |
| V\$NFKB_Q6_01    | NF-kappaB                                          | 23    | 0  | V\$TTF1_Q6     | TTF-1 (Nkx2-1)                                                      | 13              | 0  | V\$Lbx2_01   | Lbx2                                      | 23     | 0  |   |
| V\$NKX52_01      | Nkx5-2                                             | 23    | 0  | MA0038.1       | Gfi                                                                 | 11              | 0  | V\$LH2_01    | LH-2                                      | 23     | 0  |   |
| V\$NKX61_02      | NKX6.1                                             | 23    | 0  | MA0107.1       | RELA                                                                | 11              | 0  | V\$LHX3_02   | Lhx3                                      | 23     | 0  |   |
| V\$NKX63_01      | Nkx6-3<br>heterodimer                              | 23    | 0  | MA0442.1       | SOX10<br>half-site matrix, half-<br>ERE                             | 11              | 0  | V\$LHX4_01   | Lhx4                                      | 23     | 0  |   |
| V\$NRF2_Q4       | containing Nrf2                                    | 23    | 0  | V\$ER_Q6_02    |                                                                     | 11              | 0  | V\$LHX5_01   | Lhx5                                      | 23     | 0  |   |
| V\$OCT1_08       |                                                    | 1-Oct | 23 | 0              | V\$NFKAPPAB65_01                                                    | NF-kappaB (p65) | 11 | 0            | V\$LHX61_01                               | lhx6.1 | 23 | 0 |
| V\$OCTAMER_02    | Octamer                                            | 23    | 0  | V\$USF_Q6_01   | USF                                                                 | 11              | 0  | V\$LHX9_01   | Lhx9                                      | 23     | 0  |   |
| V\$OTP_01        | OTP                                                | 23    | 0  | MA0048.1       | NHLH1                                                               | 10              | 0  | V\$LIM1_01   | Lim-1                                     | 23     | 0  |   |

|                     |                                                           |       |    |                     |                                                 |     |   |              |                                        |        |    |   |
|---------------------|-----------------------------------------------------------|-------|----|---------------------|-------------------------------------------------|-----|---|--------------|----------------------------------------|--------|----|---|
| V\$P50RELAP65_Q5_01 | P50:RELA-P65                                              | 23    | 0  | MA0145.1            | Tcfcp2l1                                        | 10  | 0 | V\$LMX1_01   | Lmx-1                                  | 23     | 0  |   |
| V\$PARP_Q3          | PARP                                                      | 23    | 0  | V\$EHF_01           | EHF                                             | 10  | 0 | V\$LMX1B_01  | lmx1b                                  | 23     | 0  |   |
| V\$PAX6_02          | pax6                                                      | 23    | 0  | V\$GAF_Q6           | GAF                                             | 10  | 0 | V\$MATH1_Q2  | E47:MATH1                              | 23     | 0  |   |
| V\$PAX7_01          | Pax-7                                                     | 23    | 0  | V\$NFKB_Q6_01       | NF-kappaB                                       | 10  | 0 | V\$MEIS2_01  | Meis2<br>myocyte enhancer              | 23     | 0  |   |
| V\$PEA3_Q6          | PEA3                                                      | 23    | 0  | V\$NKX32_01         | Nkx3-2                                          | 10  | 0 | V\$MMEF2_Q6  | factor                                 | 23     | 0  |   |
| V\$PIT1_01          | Pit-1                                                     | 23    | 0  | V\$P50RELAP65_Q5_01 | P50:RELA-P65                                    | 10  | 0 | V\$MOX1_01   | Mox1                                   | 23     | 0  |   |
| V\$PMX2B_01         | PMX2B                                                     | 23    | 0  | V\$TGIF_02          | TGIF1                                           | 10  | 0 | V\$MSX1_02   | Msx-1                                  | 23     | 0  |   |
| V\$PROP1_02         | Prop-1                                                    | 23    | 0  | MA0102.2            | CEBPA<br>activating                             | 9   | 0 | V\$MSX2_01   | Msx-2                                  | 23     | 0  |   |
| V\$PSX1_01          | PSX1                                                      | 23    | 0  | V\$ATF4_Q2          | transcription factor 4<br>Hand1:E47             | 9   | 0 | V\$MSX3_01   | Msx-3                                  | 23     | 0  |   |
| V\$PU1_01           | PU1                                                       | 23    | 0  | V\$HAND1E47_01      | heterodimer                                     | 9   | 0 | V\$NANOG_02  | Nanog                                  | 23     | 0  |   |
| V\$SMAD3_Q6         | SMAD3                                                     | 23    | 0  | V\$HMG1Y_Q6         | HMG IY                                          | 9   | 0 | V\$NCX_02    | Ncx                                    | 23     | 0  |   |
| V\$SMAD4_Q6         | SMAD4                                                     | 23    | 0  | V\$KID3_01          | Kid3                                            | 9   | 0 | V\$NEUROD_02 | NeuroD                                 | 23     | 0  |   |
| V\$SOX9_Q4          | SOX9<br>signal transducer and                             | 23    | 0  | V\$LFA1_Q6          | LF-A1                                           | 9   | 0 | V\$NFAT1_Q6  | NFAT1                                  | 23     | 0  |   |
| V\$STAT4_01         | activator of<br>transcription 4<br>signal transducer and  | 23    | 0  | V\$NRSE_B           | neural-restrictive-<br>silencer-element         | 9   | 0 | V\$NFAT2_Q5  | NF-AT2                                 | 23     | 0  |   |
| V\$STAT5A_01        | activator of<br>transcription 5a<br>signal transducer and | 23    | 0  | V\$PAX4_03          | Pax-4 binding sites                             | 9   | 0 | V\$NFAT3_Q3  | NFAT3                                  | 23     | 0  |   |
| V\$STAT6_01         | activator of<br>transcription 6<br>signal transducers and | 23    | 0  | V\$PKNOX2_01        | PKNOX2                                          | 9   | 0 | V\$NFAT_Q6   | Nuclear factor of<br>activated T-cells | 23     | 0  |   |
| V\$STAT_01          | activators of<br>transcription                            | 23    | 0  | V\$TGIF2_01         | TGIF2                                           | 9   | 0 | V\$NKX11_01  | Nkx1-1                                 | 23     | 0  |   |
| V\$TAL1_Q6          | TAL1                                                      | 23    | 0  | V\$TTF1_Q3          | TTF-1, TTF1 (thyroid<br>transcription factor 1) | 9   | 0 | V\$NKX12_01  | Nkx1-2                                 | 23     | 0  |   |
| V\$TEF_01           | TEF b.s.                                                  | 23    | 0  | V\$ZBED6_01         | ZBED6                                           | 9   | 0 | V\$NKX22_02  | NKX22                                  | 23     | 0  |   |
| V\$TEL2_Q6          | Tel-2                                                     | 23    | 0  | MA0003.1            | TFAP2A                                          | 8   | 0 | V\$NKX23_01  | Nkx2-3                                 | 23     | 0  |   |
| V\$TR4_01           | TR4                                                       | 23    | 0  | MA0061.1            | NF-kappaB                                       | 8   | 0 | V\$NKX24_01  | Nkx2-4                                 | 23     | 0  |   |
| V\$TST1_02          |                                                           | 6-Oct | 23 | 0                   | MA0101.1                                        | REL | 8 | 0            | V\$NKX26_01                            | Nkx2-6 | 23 | 0 |
| V\$UNCX4.1_01       | Uncx-4.1                                                  | 23    | 0  | V\$AP2ALPHA_01      | AP-2alpha                                       | 8   | 0 | V\$NKX29_01  | Nkx2-9                                 | 23     | 0  |   |
| V\$USF_Q6_01        | USF                                                       | 23    | 0  | V\$CP2_01           | CP2                                             | 8   | 0 | V\$NKX32_02  | Nkx3-2                                 | 23     | 0  |   |
| V\$VAX1_01          | Vax-1                                                     | 23    | 0  | V\$CREL_01          | c-Rel                                           | 8   | 0 | V\$NKX3A_02  | Nkx3A                                  | 23     | 0  |   |
| V\$VSX1_01          | Vsx1                                                      | 23    | 0  | V\$E12_Q6           | E12                                             | 8   | 0 | V\$NKX52_01  | Nkx5-2                                 | 23     | 0  |   |
| MA0038.1            | Gfi                                                       | 22    | 0  | V\$NFKAPPAB_01      | NF-kappaB                                       | 8   | 0 | V\$NKX61_02  | NKX6.1<br>NK related homeobox          | 23     | 0  |   |
| MA0065.2            | PPARG::RXRA                                               | 22    | 0  | V\$RELB_P52_01      | kappaB site                                     | 8   | 0 | V\$NKX62_Q2  | factor 6-2                             | 23     | 0  |   |
| MA0068.1            | Pax4                                                      | 22    | 0  | V\$SMAD1_01         | SMAD1                                           | 8   | 0 | V\$NKX63_01  | Nkx6-3                                 | 23     | 0  |   |
| MA0079.2            | SP1                                                       | 22    | 0  | MA0069.1            | Pax6                                            | 7   | 0 | V\$OBOX1_01  | Obox1                                  | 23     | 0  |   |

|                           |                                                           |    |   |                  |                                                                                |   |   |               |                  |    |   |
|---------------------------|-----------------------------------------------------------|----|---|------------------|--------------------------------------------------------------------------------|---|---|---------------|------------------|----|---|
| MA0138.2                  | REST                                                      | 22 | 0 | V\$AP2GAMMA_01   | AP-2gamma                                                                      | 7 | 0 | V\$OBOX2_01   | Obox2            | 23 | 0 |
|                           |                                                           |    |   | V\$CACBINDINGPRO |                                                                                |   |   |               |                  |    |   |
| MA0145.1                  | Tcfcp2l1                                                  | 22 | 0 | TEIN_Q6          | CAC-binding protein                                                            | 7 | 0 | V\$OBOX3_01   | Obox3            | 23 | 0 |
| MA0161.1                  | NFIC                                                      | 22 | 0 | V\$E2F6_01       | E2F6                                                                           | 7 | 0 | V\$OBOX5_01   | Obox5            | 23 | 0 |
| V\$AMEF2_Q6               | myocyte enhancer factor                                   | 22 | 0 | V\$EAR2_Q2       | EAR2                                                                           | 7 | 0 | V\$OBOX6_01   | Obox6            | 23 | 0 |
| V\$AML2_01                | AML2                                                      | 22 | 0 | V\$HBP1_Q2       | hbp1                                                                           | 7 | 0 | V\$OCT1_04    | octamer factor 1 | 23 | 0 |
|                           | AREB6 (Atp1a1 regulatory element binding factor 6)        |    |   |                  | Meis-1 (myeloid ecotropic viral integration site 1)                            |   |   |               |                  |    |   |
| V\$AREB6_04               |                                                           | 22 | 0 | V\$MEIS1_01      |                                                                                | 7 | 0 | V\$OCT2_01    | 2-Oct            | 23 | 0 |
| V\$ARX_01                 | Arx                                                       | 22 | 0 | V\$PARP_Q3       | PARP                                                                           | 7 | 0 | V\$OCTAMER_01 | Octamer          | 23 | 0 |
| V\$BARHL1_01              | Barhl-1                                                   | 22 | 0 | V\$PREP1_01      | PREP1                                                                          | 7 | 0 | V\$OG2_02     | OG-2             | 23 | 0 |
| V\$BARX1_01               | Barx1                                                     | 22 | 0 | V\$RBPJK_Q4      | RBP-Jkappa                                                                     | 7 | 0 | V\$OTP_01     | OTP              | 23 | 0 |
| V\$BSX_01                 | Bsx                                                       | 22 | 0 | MA0065.2         | PPARG::RXRA                                                                    | 6 | 0 | V\$OTX1_01    | Otx1             | 23 | 0 |
| V\$CACCCBINDINGFAC TOR_Q6 | CACCC-binding factor CCAAT/enhancer binding protein alpha | 22 | 0 | MA0130.1         | ZNF354C                                                                        | 6 | 0 | V\$OTX2_01    | Otx2             | 23 | 0 |
| V\$CEBPA_01               |                                                           | 22 | 0 | MA0152.1         | NFATC2                                                                         | 6 | 0 | V\$OTX3_01    | Otx3             | 23 | 0 |
| V\$DR1_Q3                 | Direct repeat 1                                           | 22 | 0 | V\$CKROX_Q2      | CKROX                                                                          | 6 | 0 | V\$PARP_Q3    | PARP             | 23 | 0 |
| V\$E47_01                 | E47                                                       | 22 | 0 | V\$FOXP3_Q4      | FOXP3                                                                          | 6 | 0 | V\$PAX6_02    | pax6             | 23 | 0 |
| V\$EN1_02                 | En-1                                                      | 22 | 0 | V\$IK3_01        | Ikaros 3 complex of Lmo2 bound to Tal-1, E2A proteins, and GATA-1, half-site 1 | 6 | 0 | V\$PAX7_01    | Pax-7            | 23 | 0 |
| V\$EN2_01                 | En-2 ectopic viral integration site 1 encoded factor      | 22 | 0 | V\$LMO2COM_01    |                                                                                | 6 | 0 | V\$PBX1_04    | Pbx1             | 23 | 0 |
| V\$EV11_04                |                                                           | 22 | 0 | V\$MEIS2_01      | Meis2                                                                          | 6 | 0 | V\$PIT1_01    | Pit-1            | 23 | 0 |
| V\$FOXO4_01               | fork head box O4                                          | 22 | 0 | V\$MRG2_01       | MRG2                                                                           | 6 | 0 | V\$PITX1_01   | Pitx1            | 23 | 0 |
| V\$GR_Q6_01               | half-site matrix                                          | 22 | 0 | V\$NANOG_01      | Nanog activating transcription factor 3                                        | 6 | 0 | V\$PITX2_01   | PITX2            | 23 | 0 |
| V\$HDX_01                 | Hdx                                                       | 22 | 0 | V\$ATF3_Q6       |                                                                                | 5 | 0 | V\$PMX2A_01   | PMX2A            | 23 | 0 |
| V\$HMG1Y_Q6               | HMG IY                                                    | 22 | 0 | V\$CEBPDELTA_Q6  | C/EBPdelta                                                                     | 5 | 0 | V\$PMX2B_01   | PMX2B            | 23 | 0 |
| V\$HMX1_02                | HMX1                                                      | 22 | 0 | V\$FXR_Q2        | half-site                                                                      | 5 | 0 | V\$POU2F3_01  | POU2F3           | 23 | 0 |
| V\$HOX13_02               | HOXA5                                                     | 22 | 0 | V\$MZF1_Q5       | MZF1 olfactory neuron-specific factor                                          | 5 | 0 | V\$POU6F1_02  | POU6F1           | 23 | 0 |
| V\$HOXA2_01               | HoxA2                                                     | 22 | 0 | V\$OLF1_01       |                                                                                | 5 | 0 | V\$PROP1_02   | Prop-1           | 23 | 0 |
| V\$HOXB13_01              | HOXB13                                                    | 22 | 0 | V\$P300_01       | p300                                                                           | 5 | 0 | V\$PSX1_01    | PSX1             | 23 | 0 |
| V\$HOXB3_01               | HOXB3                                                     | 22 | 0 | V\$PTF1BETA_Q6   | PTF1-beta                                                                      | 5 | 0 | V\$PU1_Q4     | PU.1             | 23 | 0 |
| V\$HOXB5_01               | HoxB5                                                     | 22 | 0 | V\$RFX3_01       | RFX3 dimer signal transducer and activator of transcription 5b                 | 5 | 0 | V\$RAX_01     | rax              | 23 | 0 |
| V\$HOXB7_01               | HOXB7                                                     | 22 | 0 | V\$STAT5B_01     |                                                                                | 5 | 0 | V\$RHOX11_01  | Rhox11           | 23 | 0 |
| V\$HOXC8_01               | HOXC-8                                                    | 22 | 0 | V\$TFEB_01       | TFEB                                                                           | 5 | 0 | V\$S8_02      | S8               | 23 | 0 |
| V\$HOXD10_01              | HOXD10                                                    | 22 | 0 | V\$ZABC1_01      | ZABC1 b.s.                                                                     | 5 | 0 | V\$SATB1_Q3   | SATB1            | 23 | 0 |

|                  |                                        |    |   |                   |                                                    |   |   |                  |                                                                                          |    |   |
|------------------|----------------------------------------|----|---|-------------------|----------------------------------------------------|---|---|------------------|------------------------------------------------------------------------------------------|----|---|
| V\$HOXD13_01     | HOXD13                                 | 22 | 0 | MA0125.1          | Nobox                                              | 4 | 0 | V\$SHOX2_01      | Shox2                                                                                    | 23 | 0 |
| V\$HOXD1_01      | HOXD1                                  | 22 | 0 | MA0164.1          | Nr2e3                                              | 4 | 0 | V\$SIX6_01       | Six-6                                                                                    | 23 | 0 |
| V\$HOXD3_01      | HOXD3                                  | 22 | 0 | V\$AREB6_04       | AREB6 (Atp1a1 regulatory element binding factor 6) | 4 | 0 | V\$SRY_02        | sex-determining region Y gene product signal transducer and activator of transcription 1 | 23 | 0 |
| V\$ISL2_01       | Isl2                                   | 22 | 0 | V\$DBP_Q6         | DBP                                                | 4 | 0 | V\$STAT1_03      | STAT1:STAT1                                                                              | 23 | 0 |
| V\$ISRE_01       | interferon-stimulated response element | 22 | 0 | V\$ELK1_01        | Elk-1                                              | 4 | 0 | V\$STAT1STAT1_Q3 | signal transducer and activator of transcription 3                                       | 23 | 0 |
| V\$LBX2_01       | Lbx2                                   | 22 | 0 | V\$GADP_01        | Growth-associated binding protein                  | 4 | 0 | V\$STAT3_02      | signal transducer and activator of transcription 4                                       | 23 | 0 |
| V\$LH2_01        | LH-2                                   | 22 | 0 | V\$IK1_01         | Ikaros 1                                           | 4 | 0 | V\$STAT4_01      | myogenin / nuclear factor 1 or related factors                                           | 23 | 0 |
| V\$MAF_Q6_01     | MAF                                    | 22 | 0 | V\$MYOGNF1_01     | myogenin / nuclear factor 1 or related factors     | 4 | 0 | V\$STAT5A_03     | transcription 5a                                                                         | 23 | 0 |
| V\$MAFA_Q4_01    | MAFA                                   | 22 | 0 | V\$NKX25_Q5       | Nkx2-5                                             | 4 | 0 | V\$STAT6_01      | signal transducer and activator of transcription 6                                       | 23 | 0 |
| V\$MYOGENIN_Q6   | myogenin                               | 22 | 0 | V\$NUR77_Q5       | NUR77                                              | 4 | 0 | V\$TAL1_01       | Tal-1 (Scl)                                                                              | 23 | 0 |
| V\$MZF1_Q5       | MZF1                                   | 22 | 0 | V\$P53_DECAMER_Q2 | p53 decamer                                        | 4 | 0 | V\$TR4_01        | TR4                                                                                      | 23 | 0 |
| V\$NANOG_02      | Nanog                                  | 22 | 0 | V\$TFIIH_Q6       | TFII-I                                             | 4 | 0 | V\$TST1_02       | 6-Oct                                                                                    | 23 | 0 |
| V\$NFKAPPAB_01   | NF-kappaB                              | 22 | 0 | V\$CREBP1CJUN_01  | CRE-binding protein 1:c-Jun heterodimer            | 4 | 1 | V\$UNCX4.1_01    | Uncx-4.1                                                                                 | 23 | 0 |
| V\$NKX12_01      | Nkx1-2                                 | 22 | 0 | V\$LEF1TCF1_Q4    | LEF1, TCF1                                         | 4 | 1 | V\$VAX1_01       | Vax-1                                                                                    | 23 | 0 |
| V\$NKX62_Q2      | NK related homeobox factor 6-2         | 22 | 0 | V\$NURR1_Q3       | NURR1                                              | 4 | 1 | V\$VAX2_01       | Vax-2                                                                                    | 23 | 0 |
| V\$NRSF_Q4       | NRSF                                   | 22 | 0 | V\$PXRXR_01       | RXR half-site                                      | 4 | 1 | V\$VSX1_01       | Vsx1                                                                                     | 23 | 0 |
| V\$PEBP_Q6       | PEBP                                   | 22 | 0 | MA0062.2          | GABPA                                              | 3 | 0 | V\$WT1_Q6        | WT1                                                                                      | 23 | 0 |
| V\$PITX2_01      | PITX2                                  | 22 | 0 | MA0112.2          | ESR1                                               | 3 | 0 | MA0055.1         | Myf                                                                                      | 22 | 0 |
| V\$POU6F1_03     | POU6F1                                 | 22 | 0 | MA0114.1          | HNF4A                                              | 3 | 0 | MA0079.2         | SP1                                                                                      | 22 | 0 |
| V\$PTF1BETA_Q6   | PTF1-beta                              | 22 | 0 | MA0148.1          | FOXA1                                              | 3 | 0 | MA0136.1         | ELF5                                                                                     | 22 | 0 |
| V\$SHOX2_01      | Shox2                                  | 22 | 0 | V\$ATF5_01        | ATF5 binding site                                  | 3 | 0 | MA0151.1         | ARID3A                                                                                   | 22 | 0 |
| V\$STAT1STAT1_Q3 | STAT1:STAT1                            | 22 | 0 | V\$BEN_01         | BEN                                                | 3 | 0 | MA0156.1         | FEV                                                                                      | 22 | 0 |
| V\$T3R_Q6        | half-site matrix TCF11:MafG            | 22 | 0 | V\$COUP_DR1_Q6    | COUP direct repeat 1                               | 3 | 0 | V\$AP2GAMMA_01   | AP-2gamma                                                                                | 22 | 0 |
| V\$TCF11MAFG_01  | heterodimers                           | 22 | 0 | V\$CREB_Q3        | CREB cAMP-responsive element binding protein 1     | 3 | 0 | V\$AP4_Q5        | activator protein 4                                                                      | 22 | 0 |
| V\$WT1_Q6        | WT1                                    | 22 | 0 | V\$CREBP1_01      | CREB cAMP-responsive element binding protein 1     | 3 | 0 | V\$BCL6_01       | BCL6                                                                                     | 22 | 0 |
| V\$ZFP281_01     | Zfp281                                 | 22 | 0 | V\$GLI3_01        | GLI3                                               | 3 | 0 | V\$BLIMP1_Q6     | BLIMP1                                                                                   | 22 | 0 |
| MA0048.1         | NHLH1                                  | 21 | 0 | V\$HSF_Q6         | HSF                                                | 3 | 0 | V\$CDX_Q5        | Cdx                                                                                      | 22 | 0 |

|                |                                              |    |   |                  |                                                                                       |   |   |                |                                                     |    |   |
|----------------|----------------------------------------------|----|---|------------------|---------------------------------------------------------------------------------------|---|---|----------------|-----------------------------------------------------|----|---|
| MA0050.1       | IRF1                                         | 21 | 0 | V\$IRF1_Q6       | IRF-1                                                                                 | 3 | 0 | V\$CETS1P54_Q2 | c-Ets-1(p54)                                        | 22 | 0 |
| MA0060.1       | NFYA                                         | 21 | 0 | V\$MYCMAX_01     | c-Myc:Max heterodimer                                                                 | 3 | 0 | V\$CHCH_01     | Churchill                                           | 22 | 0 |
| MA0061.1       | NF-kappaB                                    | 21 | 0 | V\$P50P50_Q3     | P50:P50                                                                               | 3 | 0 | V\$CKROX_Q2    | CKROX                                               | 22 | 0 |
| MA0084.1       | SRY                                          | 21 | 0 | V\$PNR_01        | PNR                                                                                   | 3 | 0 | V\$DRI1_01     | DRI1 b.s.                                           | 22 | 0 |
| MA0092.1       | Hand1::Tcfe2a                                | 21 | 0 | V\$PPARA_Q6      | half-site                                                                             | 3 | 0 | V\$DUXL_01     | Duxl                                                | 22 | 0 |
| MA0117.1       | Mafb                                         | 21 | 0 | V\$RFX1_01       | X-box binding protein RFX1                                                            | 3 | 0 | V\$EBF_Q6      | EBF                                                 | 22 | 0 |
| MA0148.1       | FOXA1                                        | 21 | 0 | V\$SP1_01        | stimulating protein 1                                                                 | 3 | 0 | V\$EGR_Q6      | Egr                                                 | 22 | 0 |
| V\$ALPHACP1_01 | alpha-CP1                                    | 21 | 0 | V\$STAT1STAT1_Q3 | STAT1:STAT1 zinc finger protein expressed in embryonal cells and certain adult organs | 3 | 0 | V\$ELK1_01     | Elk-1                                               | 22 | 0 |
| V\$AML_Q6      | AML                                          | 21 | 0 | V\$ZEC_01        |                                                                                       | 3 | 0 | V\$ETF_Q6      | ETF ectopic viral integration site 1 encoded factor | 22 | 0 |
| V\$CDP_03      | CDP CCAAT/enhancer binding factor            | 21 | 0 | V\$CPHX_01       | Cphx                                                                                  | 3 | 1 | V\$EVI1_04     |                                                     | 22 | 0 |
| V\$CEBP_Q2     |                                              | 21 | 0 | V\$CRX_Q4_01     | CRX                                                                                   | 3 | 1 | V\$FAC1_01     | fetal Alz-50 clone 1                                | 22 | 0 |
| V\$CP2_01      | CP2                                          | 21 | 0 | MA0014.1         | Pax5                                                                                  | 2 | 0 | V\$FOXO3A_Q1   | FOXO3A                                              | 22 | 0 |
| V\$DLX1_01     | Dlx-1                                        | 21 | 0 | MA0025.1         | NFIL3                                                                                 | 2 | 0 | V\$FOXO4_01    | fork head box O4                                    | 22 | 0 |
| V\$DOBOX5_01   | Dobox5                                       | 21 | 0 | MA0060.1         | NFYA                                                                                  | 2 | 0 | V\$HNF3_Q6_01  | HNF3                                                | 22 | 0 |
| V\$DRI1_01     | DRI1 b.s. half-site matrix, half-ERE         | 21 | 0 | MA0083.1         | SRF                                                                                   | 2 | 0 | V\$ICSBP_Q6    | ICSBP                                               | 22 | 0 |
| V\$ER_Q6_02    |                                              | 21 | 0 | MA0087.1         | Sox5                                                                                  | 2 | 0 | V\$LRF_Q2      | LRF                                                 | 22 | 0 |
| V\$HNF3_Q6_01  | HNF3 Hepatocyte Nuclear Factor 3beta         | 21 | 0 | MA0103.1         | ZEB1                                                                                  | 2 | 0 | V\$MAZ_Q6      | MAZ                                                 | 22 | 0 |
| V\$HNF3B_01    |                                              | 21 | 0 | MA0105.1         | NFKB1                                                                                 | 2 | 0 | V\$MEF2_Q6_01  | MEF-2                                               | 22 | 0 |
| V\$HOXB6_01    | HOXB6 myocyte enhancer factor                | 21 | 0 | MA0158.1         | HOXA5                                                                                 | 2 | 0 | V\$MEIS1_02    | Meis1                                               | 22 | 0 |
| V\$MMEF2_Q6    |                                              | 21 | 0 | MA0160.1         | NR4A2                                                                                 | 2 | 0 | V\$NKX25_Q3    | NKX25 neuron-restrictive silencer factor            | 22 | 0 |
| V\$MOX1_01     | Mox1 nuclear factor Y (Y-box binding factor) | 21 | 0 | V\$BARX1_01      | Barx1                                                                                 | 2 | 0 | V\$NRSF_01     |                                                     | 22 | 0 |
| V\$NFY_01      |                                              | 21 | 0 | V\$BCL6_Q2       | BCL6                                                                                  | 2 | 0 | V\$PAX2_Q2     | paired box factor 2                                 | 22 | 0 |
| V\$OBOX5_01    | Obox5                                        | 21 | 0 | V\$BRN3C_Q1      | Brn-3c                                                                                | 2 | 0 | V\$SOX4_Q1     | SOX4                                                | 22 | 0 |
| V\$OTX1_01     | Otx1                                         | 21 | 0 | V\$BSX_Q1        | Bsx                                                                                   | 2 | 0 | V\$SP1SP3_Q4   | SP1:SP3                                             | 22 | 0 |
| V\$OTX2_01     | Otx2                                         | 21 | 0 | V\$CACCCBINDINGF |                                                                                       |   |   |                |                                                     |    |   |
| V\$OTX2_01     |                                              | 21 | 0 | ACTOR_Q6         | CACCC-binding factor                                                                  | 2 | 0 | V\$SP4_Q5      | SP4                                                 | 22 | 0 |
| V\$RELB_P52_01 | kappaB site                                  | 21 | 0 | V\$CMYC_Q1       | c-Myc site                                                                            | 2 | 0 | V\$TBP_Q1      | TATA binding protein                                | 22 | 0 |
| V\$RHOX11_01   | Rhox11                                       | 21 | 0 | V\$DAX1_Q1       | Dax1                                                                                  | 2 | 0 | V\$TGIF2_Q1    | TGIF2                                               | 22 | 0 |
| V\$S8_Q2       | S8                                           | 21 | 0 | V\$E47_Q1        | E47                                                                                   | 2 | 0 | V\$TGIF_Q2     | TGIF1                                               | 22 | 0 |
| V\$SMAD1_01    | SMAD1                                        | 21 | 0 | V\$E4BP4_Q1      | E4BP4                                                                                 | 2 | 0 | MA0056.1       | MZF1_1-4                                            | 21 | 0 |
| V\$TEF1_Q6     | TEF-1                                        | 21 | 0 | V\$GRE_C         | Glucocorticoid response element                                                       | 2 | 0 | MA0144.1       | Stat3                                               | 21 | 0 |



|                |                                                                                        |    |   |                     |                      |   |   |                |                                                        |    |   |
|----------------|----------------------------------------------------------------------------------------|----|---|---------------------|----------------------|---|---|----------------|--------------------------------------------------------|----|---|
| V\$TFII_Q6     | TFII-I                                                                                 | 21 | 0 | V\$HEN1_02          | HEN1                 | 2 | 0 | MA0152.1       | NFATC2                                                 | 21 | 0 |
| V\$TGIF_02     | TGIF1                                                                                  | 21 | 0 | V\$HP1SITEFACTOR_Q6 | HP1 site factor      | 2 | 0 | V\$AP1_Q6      | activator protein 1                                    | 21 | 0 |
| MA0056.1       | MZF1_1-4                                                                               | 20 | 0 | V\$LEF1_Q2_01       | LEF1                 | 2 | 0 | V\$E12_Q6      | E12                                                    | 21 | 0 |
| V\$AP2REP_01   | AP-2 repressor<br>CCAAT/enhancer<br>binding protein beta                               | 20 | 0 | V\$LRH1_Q5          | LRH1                 | 2 | 0 | V\$E47_01      | E47                                                    | 21 | 0 |
| V\$CEBPB_01    | CEBPB                                                                                  | 20 | 0 | V\$NFKAPPAB50_01    | NF-kappaB (p50)      | 2 | 0 | V\$ESE1_Q3     | ESE1                                                   | 21 | 0 |
| V\$DLX2_01     | Dlx-2                                                                                  | 20 | 0 | V\$OCT4_02          | Oct-4 (POU5F1)       | 2 | 0 | V\$FLI1_Q6     | FLI1                                                   | 21 | 0 |
| V\$E2A_Q6      | E2A                                                                                    | 20 | 0 | V\$OG2_01           | OG-2                 | 2 | 0 | V\$FOXO1_01    | fork head box O1<br>Hepatocyte Nuclear<br>Factor 3beta | 21 | 0 |
| V\$EVX1_01     | Evx-1                                                                                  | 20 | 0 | V\$PPAR_DR1_Q2      | PPAR direct repeat 1 | 2 | 0 | V\$HNF3B_01    | interferon regulatory<br>factor 7                      | 21 | 0 |
| V\$FOXO1_01    | fork head box O1                                                                       | 20 | 0 | V\$SF1_Q6           | SF1                  | 2 | 0 | V\$IRF7_01     | interferon-stimulated<br>response element              | 21 | 0 |
| V\$HNF4_DR1_Q3 | HNF4 direct repeat 1                                                                   | 20 | 0 | V\$TFE_Q6           | TFE                  | 2 | 0 | V\$ISRE_01     | interferon-stimulated<br>response element              | 21 | 0 |
| V\$HOXA1_01    | HOXA1                                                                                  | 20 | 0 | V\$TST1_02          |                      | 2 | 0 | V\$LHX8_01     | Lhx8                                                   | 21 | 0 |
| V\$LHX4_01     | Lhx4<br>complex of Lmo2<br>bound to Tal-1, E2A<br>proteins, and GATA-1,<br>half-site 1 | 20 | 0 | V\$ZFP281_01        | Zfp281               | 2 | 0 | V\$MRG2_01     | MRG2                                                   | 21 | 0 |
| V\$LMO2COM_01  | complex of Lmo2<br>bound to Tal-1, E2A<br>proteins, and GATA-1,<br>half-site 1         | 20 | 0 | MA0056.1            | MZF1_1-4             | 2 | 1 | V\$MYOD_Q6_01  | MyoD                                                   | 21 | 0 |
| V\$NFAT3_Q3    | NFAT3                                                                                  | 20 | 0 | V\$SREBP1_Q5        | SREBP1               | 2 | 1 | V\$MYOGENIN_Q6 | myogenin                                               | 21 | 0 |
| V\$NKX22_02    | NKX22                                                                                  | 20 | 0 | MA0031.1            | FOXD1                | 1 | 0 | V\$MZF1_Q5     | MZF1<br>nuclear respiratory<br>factor 2                | 21 | 0 |
| V\$NKX23_01    | Nkx2-3                                                                                 | 20 | 0 | MA0039.2            | Klf4                 | 1 | 0 | V\$NRF2_01     | nuclear respiratory<br>factor 2                        | 21 | 0 |
| V\$NKX3A_02    | Nkx3A                                                                                  | 20 | 0 | MA0058.1            | MAX                  | 1 | 0 | V\$PEA3_Q6     | PEA3                                                   | 21 | 0 |
| V\$NRSE_B      | neural-restrictive-<br>silencer-element                                                | 20 | 0 | MA0059.1            | MYC::MAX             | 1 | 0 | V\$PKNOX2_01   | PKNOX2                                                 | 21 | 0 |
| V\$PAX8_B      | Pax-8 binding sites                                                                    | 20 | 0 | MA0093.1            | USF1                 | 1 | 0 | V\$SIRT6_01    | SIRT6                                                  | 21 | 0 |
| V\$PITX1_01    | Pitx1                                                                                  | 20 | 0 | MA0104.2            | Mycn                 | 1 | 0 | V\$SIX4_01     | six4                                                   | 21 | 0 |
| V\$PMX2A_01    | PMX2A                                                                                  | 20 | 0 | MA0106.1            | TP53                 | 1 | 0 | V\$SOX2_Q6     | SOX2                                                   | 21 | 0 |
| V\$PPARG_Q6    | half-site                                                                              | 20 | 0 | MA0113.1            | NR3C1                | 1 | 0 | MA0046.1       | HNF1A                                                  | 20 | 0 |
| V\$SP4_Q5      | SP4<br>signal transducer and<br>activator of<br>transcription 5b                       | 20 | 0 | MA0116.1            | Zfp423               | 1 | 0 | MA0050.1       | IRF1                                                   | 20 | 0 |
| V\$STAT5B_01   | transcription 5b<br>TCF11/KCR-F1/Nrf1<br>homodimers                                    | 20 | 0 | MA0141.1            | Esrrb                | 1 | 0 | MA0138.2       | REST                                                   | 20 | 0 |
| V\$TCF11_01    | TCF11/KCR-F1/Nrf1<br>homodimers                                                        | 20 | 0 | MA0143.1            | Sox2                 | 1 | 0 | V\$BRN2_01     | POU factor Brn-2                                       | 20 | 0 |
| V\$AML1_Q4     | AML1                                                                                   | 20 | 1 | MA0155.1            | INSM1                | 1 | 0 | V\$CPHX_01     | Cphx                                                   | 20 | 0 |
| V\$CEBPE_01    | cebpe                                                                                  | 19 | 0 | MA0159.1            | RXR::RAR_DR5         | 1 | 0 | V\$CRX_02      | Crx                                                    | 20 | 0 |
| V\$DUXL_01     | Duxl                                                                                   | 19 | 0 | MA0258.1            | ESR2                 | 1 | 0 | V\$EAR2_Q2     | EAR2                                                   | 20 | 0 |
| V\$IK1_01      | Ikaros 1                                                                               | 19 | 0 | V\$BARX2_01         | Barx-2               | 1 | 0 | V\$EVX2_01     | Evx2                                                   | 20 | 0 |
| V\$LHX61_01    | lhx6.1                                                                                 | 19 | 0 | V\$BRN4_01          | Brn-4                | 1 | 0 | V\$FOXO3_01    | fork head box O3                                       | 20 | 0 |
| V\$MEIS1_02    | Meis1                                                                                  | 19 | 0 | V\$CLOCKBMAL_Q6     | CLOCK:BMAL           | 1 | 0 | V\$FRA1_Q5     | FRA1                                                   | 20 | 0 |

|                 |                                                                                               |    |   |                  |                                                                 |   |   |                     |                                                                                      |    |   |
|-----------------|-----------------------------------------------------------------------------------------------|----|---|------------------|-----------------------------------------------------------------|---|---|---------------------|--------------------------------------------------------------------------------------|----|---|
| V\$MEIS2_01     | Meis2                                                                                         | 19 | 0 | V\$DBX2_01       | Dbx-2                                                           | 1 | 0 | V\$FREAC7_01        | Fork head Related<br>Activator-7                                                     | 20 | 0 |
| V\$NKX29_01     | Nkx2-9                                                                                        | 19 | 0 | V\$DELTAEF1_01   | deltaEF1                                                        | 1 | 0 | V\$HELIOSA_02       | Helios A                                                                             | 20 | 0 |
| V\$NKX32_02     | Nkx3-2                                                                                        | 19 | 0 | V\$DOBOX5_01     | Dobox5                                                          | 1 | 0 | V\$KROX_Q6          | KROX                                                                                 | 20 | 0 |
| V\$OSF2_Q6      | Osf2                                                                                          | 19 | 0 | V\$EVI1_06       | ectopic viral<br>integration site 1<br>encoded factor           | 1 | 0 | V\$NERF_Q2          | new ets-related factor<br>1a                                                         | 20 | 0 |
| V\$PBX1_04      | Pbx1                                                                                          | 19 | 0 | V\$FOXO4_01      | fork head box O4<br>Fork head Related                           | 1 | 0 | V\$NFE2_01          | NF-E2 p45                                                                            | 20 | 0 |
| V\$PKNOX2_01    | PKNOX2                                                                                        | 19 | 0 | V\$FREAC4_01     | ACTivator-4<br>growth factor                                    | 1 | 0 | V\$NKX21_01         | Nkx2-1<br>neural-restrictive-<br>silencer-element                                    | 20 | 0 |
| V\$PREP1_01     | PREP1                                                                                         | 19 | 0 | V\$GF11_01       | independence 1                                                  | 1 | 0 | V\$NRSE_B           | PREP1                                                                                | 20 | 0 |
| V\$SIX4_01      | six4                                                                                          | 19 | 0 | V\$HDX_01        | Hdx                                                             | 1 | 0 | V\$PREP1_01         | PREP1                                                                                | 20 | 0 |
| V\$TGIF2_01     | TGIF2                                                                                         | 19 | 0 | V\$HMX1_01       | H6 homeobox 3                                                   | 1 | 0 | V\$PTF1BETA_Q6      | PTF1-beta                                                                            | 20 | 0 |
| V\$ZBED6_01     | ZBED6                                                                                         | 19 | 0 | V\$HOXB3_01      | HOXB3                                                           | 1 | 0 | V\$SOX9_Q4          | SOX9                                                                                 | 20 | 0 |
| MA0114.1        | HNF4A                                                                                         | 18 | 0 | V\$HOXD3_01      | HOXD3                                                           | 1 | 0 | V\$STAT_Q6          | STAT                                                                                 | 20 | 0 |
| MA0119.1        | TLX1::NFIC                                                                                    | 18 | 0 | V\$HOXD8_01      | HOXD8<br>Heat shock                                             | 1 | 0 | V\$TCF4_01          | TCF-4                                                                                | 20 | 0 |
| V\$CPHX_01      | Cphx<br>selection of the<br>binding sites for CTCF<br>by HOX11 cooperative<br>DNA binding [2] | 18 | 0 | V\$HSF2_02       | Heat shock<br>transcription factor 2                            | 1 | 0 | V\$TEF_Q6           | TEF                                                                                  | 20 | 0 |
| V\$CTF1_01      |                                                                                               | 18 | 0 | V\$IRF3_Q3       | IRF3                                                            | 1 | 0 | V\$ANTP_Q6_01       | Antp                                                                                 | 19 | 0 |
| V\$FOXP3_Q4     | FOXP3                                                                                         | 18 | 0 | V\$ISRE_01       | interferon-stimulated<br>response element                       | 1 | 0 | V\$HP1SITEFACTOR_Q6 | HP1 site factor                                                                      | 19 | 0 |
| V\$GBX1_01      | Gbx1                                                                                          | 18 | 0 | V\$LHX3_01       | LIM homeobox<br>transcription factor 3                          | 1 | 0 | V\$LMAF_Q2          | LMAF                                                                                 | 19 | 0 |
| V\$GSH2_01      | GSH2                                                                                          | 18 | 0 | V\$MEF2_03       | myogenic MADS factor<br>MEF-2                                   | 1 | 0 | V\$RSRFC4_Q2        | RSRFC4                                                                               | 19 | 0 |
| V\$HAND1E47_01  | Hand1:E47<br>heterodimer                                                                      | 18 | 0 | V\$MTERF_01      | mTERF binding site<br>nerve growth factor-<br>induced protein C | 1 | 0 | V\$SIX1_01          | Six-1                                                                                | 19 | 0 |
| V\$MRG2_01      | MRG2                                                                                          | 18 | 0 | V\$NGFIC_01      |                                                                 | 1 | 0 | V\$SMAD1_01         | SMAD1                                                                                | 19 | 0 |
| V\$MSX2_01      | Msx-2                                                                                         | 18 | 0 | V\$OCT_C         | Octamer binding site                                            | 1 | 0 | V\$T3R_Q6           | half-site matrix                                                                     | 19 | 0 |
| V\$NUR77_Q5     | NUR77                                                                                         | 18 | 0 | V\$PAX3_01       | Pax-3 binding sites                                             | 1 | 0 | V\$TEL2_Q6          | Tel-2                                                                                | 19 | 0 |
| V\$OBOX3_01     | Obox3                                                                                         | 18 | 0 | V\$PBX1_01       | Pbx-1                                                           | 1 | 0 | V\$TFII_Q6          | TFII-I                                                                               | 19 | 0 |
| V\$PAX_Q6       | Pax                                                                                           | 18 | 0 | V\$PIT1_01       | Pit-1                                                           | 1 | 0 | V\$UF1H3BETA_Q6     | UF1H3BETA                                                                            | 19 | 0 |
| V\$RFX3_01      | RFX3 dimer                                                                                    | 18 | 0 | V\$POU5F1_01     | POU5F1 b.s.                                                     | 1 | 0 | MA0101.1            | REL                                                                                  | 18 | 0 |
| V\$SIRT6_01     | SIRT6                                                                                         | 18 | 0 | V\$RXRG_01       | RXRG dimer                                                      | 1 | 0 | V\$CEBPGAMMA_Q6     | C/EBPgamma                                                                           | 18 | 0 |
| V\$UF1H3BETA_Q6 | UF1H3BETA                                                                                     | 18 | 0 | V\$SOX17_01      | half-site                                                       | 1 | 0 | V\$FOXJ2_02         | fork head box J 2<br>complex of Lmo2<br>bound to Tal-1, E2A<br>proteins, and GATA-1, | 18 | 0 |
| V\$VAX2_01      | Vax-2                                                                                         | 18 | 0 | V\$SRY_01        | sex-determining<br>region Y gene product                        | 1 | 0 | V\$LMO2COM_01       | half-site 1                                                                          | 18 | 0 |
| V\$TTF1_Q6      | TTF-1 (Nkx2-1)                                                                                | 18 | 1 | V\$STAT3STAT3_Q3 | STAT3:STAT3                                                     | 1 | 0 | V\$SIX2_01          | Six-2                                                                                | 18 | 0 |
| V\$SREBP2_Q6    | SREBP2                                                                                        | 18 | 2 | V\$STRA13_01     | Stra13                                                          | 1 | 0 | V\$SIX3_01          | Six-3                                                                                | 18 | 0 |

BOR-Papers in Press. Published as DOI: 10.1095/biolreprod.113.110403

|                   |                                  |    |   |               |                                                                                                                                          |   |   |                         |                            |    |   |
|-------------------|----------------------------------|----|---|---------------|------------------------------------------------------------------------------------------------------------------------------------------|---|---|-------------------------|----------------------------|----|---|
| MA0067.1          | Pax2                             | 17 | 0 | V\$TAXCREB_02 | Tax/CREB complex                                                                                                                         | 1 | 0 | V\$TATA_C               | Retroviral TATA box        | 18 | 0 |
| V\$ALX4_02        | Alx-4                            | 17 | 0 | V\$TBX15_01   | T-box 15                                                                                                                                 | 1 | 0 | V\$ZFP281_01            | Zfp281                     | 18 | 0 |
| V\$ATF5_01        | ATF5 binding site                | 17 | 0 | V\$TCF4_Q5    | TCF-4                                                                                                                                    | 1 | 0 | MA0143.1                | Sox2                       | 17 | 0 |
| V\$EBOX_Q6_01     | Ebox                             | 17 | 0 | V\$VBP_01     | PAR-type chicken vitellogenin promoter-binding protein vitamin D receptor; mediates vitamin D3-signaling, often dimerizes with RXR-alpha | 1 | 0 | V\$AP1FJ_Q2             | activator protein 1        | 17 | 0 |
| V\$HMBOX1_01      | Hmbbox1                          | 17 | 0 | V\$VDR_Q3     | alpha                                                                                                                                    | 1 | 0 | V\$DMRT7_01             | DMRT7                      | 17 | 0 |
| V\$HOMEZ_01       | Homez                            | 17 | 0 | V\$ZFP206_01  | Zfp206                                                                                                                                   | 1 | 0 | V\$GAF_Q6               | GAF                        | 17 | 0 |
| V\$HOXA3_02       | HOXA3                            | 17 | 0 | MA0071.1      | RORA_1                                                                                                                                   | 1 | 1 | V\$HFH1_01              | HNF-3/Fkh Homolog 1        | 17 | 0 |
| V\$OBOX2_01       | Obox2                            | 17 | 0 | MA0122.1      | Nkx3-2                                                                                                                                   | 1 | 1 | V\$MOVOB_01             | MOV0-B                     | 17 | 0 |
| V\$PXRXR_01       | RXR half-site                    | 17 | 0 | MA0132.1      | Pdx1                                                                                                                                     | 1 | 1 | V\$P53_03               | tumor suppressor p53       | 17 | 0 |
| V\$RBPJK_Q4       | RBP-Jkappa                       | 17 | 0 | MA0133.1      | BRCA1                                                                                                                                    | 1 | 1 | V\$PITX3_01             | Pitx3                      | 17 | 0 |
| V\$RORBETA_Q2     | RORBETA                          | 17 | 0 | MA0151.1      | ARID3A                                                                                                                                   | 1 | 1 | V\$PUR1_Q4              | PUR1                       | 17 | 0 |
| V\$SOX2_Q6        | SOX2                             | 17 | 0 | V\$FOXM1_01   | FOXM1                                                                                                                                    | 1 | 1 | V\$SOX_Q6               | SOX                        | 17 | 0 |
| V\$SOX4_01        | SOX4                             | 17 | 0 | V\$HNF3_Q6_01 | HNF3                                                                                                                                     | 1 | 1 | V\$TCF3_01              | TCF-3                      | 17 | 0 |
| V\$TCF4_Q5        | TCF-4                            | 17 | 0 | V\$KROX_Q6    | KROX                                                                                                                                     | 1 | 1 | V\$CACBINDINGPROTEIN_Q6 | CAC-binding protein        | 16 | 0 |
| V\$ZABC1_01       | ZABC1 b.s.                       | 17 | 0 | V\$OCT2_02    | 2-Oct                                                                                                                                    | 1 | 1 | V\$CREL_01              | c-Rel                      | 16 | 0 |
| V\$BCL6_01        | BCL6                             | 16 | 0 | V\$POU6F1_01  | POU6F1                                                                                                                                   | 1 | 1 | V\$E2F_Q2               | E2F                        | 16 | 0 |
| V\$EHF_01         | EHF                              | 16 | 0 | V\$BRACH_01   | Brachyury                                                                                                                                | 1 | 3 | V\$FOX3_01              | fork head box D3           | 16 | 0 |
| V\$EMX2_01        | EMX2                             | 16 | 0 | MA0075.1      | Prrx2                                                                                                                                    | 1 | 6 | V\$GATA4_Q3             | GATA-4                     | 16 | 0 |
| V\$GFI1_01        | growth factor independence 1     | 16 | 0 | MA0018.2      | CREB1                                                                                                                                    | 0 | 1 | V\$HMEF2_Q6             | myocyte enhancer factor    | 16 | 0 |
| V\$HOXC13_01      | HOXC13                           | 16 | 0 | MA0029.1      | Evi1                                                                                                                                     | 0 | 1 | V\$NFMUE1_Q6            | NF-muE1                    | 16 | 0 |
| V\$NKX21_01       | Nkx2-1                           | 16 | 0 | MA0068.1      | Pax4                                                                                                                                     | 0 | 1 | V\$PXRXR_01             | RXR half-site              | 16 | 0 |
| V\$NKX26_01       | Nkx2-6                           | 16 | 0 | MA0088.1      | znf143                                                                                                                                   | 0 | 1 | V\$TAL1ALPHA47_01       | Tal-1alpha:E47 heterodimer | 16 | 0 |
| V\$OLF1_01        | olfactory neuron-specific factor | 16 | 0 | MA0115.1      | NR1H2::RXRA AhR nuclear translocator                                                                                                     | 0 | 1 | V\$ZFP206_01            | Zfp206                     | 16 | 0 |
| V\$PXR_Q2         | half-site matrix                 | 16 | 0 | V\$ARNT_02    | homodimers                                                                                                                               | 0 | 1 | MA0040.1                | Foxq1                      | 15 | 0 |
| V\$TAL1ALPHA47_01 | Tal-1alpha:E47 heterodimer       | 16 | 0 | V\$CART1_01   | Cart-1 (cartilage homeoprotein 1) cut-like homeodomain protein                                                                           | 0 | 1 | MA0135.1                | Lhx3                       | 15 | 0 |
| MA0047.2          | Foxa2                            | 15 | 0 | V\$CDP_01     | protein                                                                                                                                  | 0 | 1 | MA0158.1                | HOXA5                      | 15 | 0 |
| MA0151.1          | ARID3A                           | 15 | 0 | V\$CNOT3_01   | CNOT3                                                                                                                                    | 0 | 1 | V\$AR_Q6                | half-site matrix           | 15 | 0 |
| MA0442.1          | SOX10                            | 15 | 0 | V\$DLX2_01    | Dlx-2                                                                                                                                    | 0 | 1 | V\$ATF5_01              | ATF5 binding site          | 15 | 0 |
| V\$DLX3_01        | dlx3                             | 15 | 0 | V\$DLX7_01    | Dlx7                                                                                                                                     | 0 | 1 | V\$BACH2_01             | BTB and CNC homolog 2      | 15 | 0 |

|                  |                                                                                   |       |    |               |                                                               |     |   |                 |                                                            |       |    |   |
|------------------|-----------------------------------------------------------------------------------|-------|----|---------------|---------------------------------------------------------------|-----|---|-----------------|------------------------------------------------------------|-------|----|---|
| V\$HNF3A_01      | FOXA1                                                                             | 15    | 0  | V\$DMRT5_01   | DMRT5                                                         | 0   | 1 | V\$CEBPB_01     | CCAAT/enhancer binding protein beta                        | 15    | 0  |   |
| V\$OCT2_01       |                                                                                   | 2-Oct | 15 | 0             | V\$E2F_01                                                     | E2F | 0 | 1               | V\$COMP1_01                                                | COMP1 | 15 | 0 |
| V\$OG2_02        | OG-2                                                                              | 15    | 0  | V\$EGR3_01    | early growth response gene 3 product                          | 0   | 1 | V\$ERG_01       | ERG                                                        | 15    | 0  |   |
| V\$POU2F3_01     | POU2F3                                                                            | 15    | 0  | V\$FOXO1_02   | fork head box O1                                              | 0   | 1 | V\$GADP_01      | Growth-associated binding protein                          | 15    | 0  |   |
| V\$RAX_01        | rax                                                                               | 15    | 0  | V\$FREAC2_01  | Fork head RElated ACTivator-2 GCNF (germ cell nuclear factor) | 0   | 1 | V\$LFA1_Q6      | LF-A1                                                      | 15    | 0  |   |
| V\$KID3_01       | Kid3                                                                              | 15    | 1  | V\$GCNF_01    |                                                               | 0   | 1 | V\$NFKB_Q6_01   | NF-kappaB Sox2-Oct4 joint motif, in silico predicted       | 15    | 0  |   |
| V\$P300_01       | p300                                                                              | 15    | 2  | V\$GKLF_02    | GKLF (KLF4)                                                   | 0   | 1 | V\$OCT4_01      |                                                            | 15    | 0  |   |
| MA0113.1         | NR3C1                                                                             | 14    | 0  | V\$GLI_Q2     | GLI                                                           | 0   | 1 | V\$RNF96_01     | RNF96                                                      | 15    | 0  |   |
| MA0135.1         | Lhx3                                                                              | 14    | 0  | V\$HELIOSA_02 | Helios A                                                      | 0   | 1 | V\$USF_Q6_01    | USF                                                        | 15    | 0  |   |
| V\$CDX_Q5        | Cdx                                                                               | 14    | 0  | V\$HFH1_01    | HNF-3/Fkh Homolog 1                                           | 0   | 1 | MA0052.1        | MEF2A                                                      | 14    | 0  |   |
| V\$CREBP1CJUN_01 | CRE-binding protein 1:c-Jun heterodimer                                           | 14    | 0  | V\$HFH4_01    | HFH4 (FOXJ1)                                                  | 0   | 1 | MA0060.1        | NFYA                                                       | 14    | 0  |   |
| V\$DAX1_01       | Dax1                                                                              | 14    | 0  | V\$HIF2A_01   | HIF-2alpha                                                    | 0   | 1 | MA0062.2        | GABPA                                                      | 14    | 0  |   |
| V\$DLX7_01       | Dlx7                                                                              | 14    | 0  | V\$HMEF2_Q6   | myocyte enhancer factor                                       | 0   | 1 | MA0113.1        | NR3C1                                                      | 14    | 0  |   |
| V\$FAC1_01       | fetal Alz-50 clone 1                                                              | 14    | 0  | V\$HNF3B_01   | Hepatocyte Nuclear Factor 3beta                               | 0   | 1 | V\$BACH1_01     | BTB and CNC homolog 1                                      | 14    | 0  |   |
| V\$GADP_01       | Growth-associated binding protein                                                 | 14    | 0  | V\$IRF2_01    | interferon regulatory factor 2                                | 0   | 1 | V\$CDC5_01      | cell division control protein 5                            | 14    | 0  |   |
| V\$GBX2_01       | Gbx2                                                                              | 14    | 0  | V\$MECP2_01   | MECP2 b.s.                                                    | 0   | 1 | V\$FREAC2_01    | Fork head RElated ACTivator-2 growth factor independence 1 | 14    | 0  |   |
| V\$IRF7_01       | interferon regulatory factor 7                                                    | 14    | 0  | V\$MTF1_Q4    | MTF-1                                                         | 0   | 1 | V\$GFI1_01      |                                                            | 14    | 0  |   |
| V\$MEF2_02       | myogenic MADS factor MEF-2                                                        | 14    | 0  | V\$NKX11_01   | Nkx1-1                                                        | 0   | 1 | V\$HNF3ALPHA_Q6 | HNF3alpha                                                  | 14    | 0  |   |
| V\$NKX24_01      | Nkx2-4                                                                            | 14    | 0  | V\$NKX61_01   | NKX6-1                                                        | 0   | 1 | V\$HNF6_Q6      | HNF6                                                       | 14    | 0  |   |
| V\$P50P50_Q3     | P50:P50                                                                           | 14    | 0  | V\$OBOX3_01   | Obox3                                                         | 0   | 1 | V\$HSF_Q6       | HSF                                                        | 14    | 0  |   |
| V\$P53_Q3        | tumor suppressor p53                                                              | 14    | 0  | V\$OBOX5_01   | Obox5                                                         | 0   | 1 | V\$KLF15_Q2     | KLF15                                                      | 14    | 0  |   |
| V\$PPAR_DR1_Q2   | PPAR direct repeat 1                                                              | 14    | 0  | V\$OBOX6_01   | Obox6                                                         | 0   | 1 | V\$E2A_Q6       | E2A                                                        | 14    | 1  |   |
| V\$SATB1_Q3      | SATB1                                                                             | 14    | 0  | V\$OCT1_Q5_01 |                                                               | 0   | 1 | MA0039.2        | Klf4                                                       | 13    | 0  |   |
| V\$SOX_Q6        | SOX                                                                               | 14    | 0  | V\$PITX1_01   | Pitx1                                                         | 0   | 1 | MA0063.1        | Nkx2-5                                                     | 13    | 0  |   |
| V\$SP3_Q3        | Sp3                                                                               | 14    | 0  | V\$POU3F2_01  | POU3F2                                                        | 0   | 1 | MA0075.1        | Prrx2                                                      | 13    | 0  |   |
| V\$TFEB_01       | TFEB                                                                              | 14    | 0  | V\$PR_Q2      | half-site matrix                                              | 0   | 1 | V\$E2F1DP1RB_01 | Rb:E2F-1:DP-1 trimeric complex                             | 13    | 0  |   |
|                  | vitamin D receptor; mediates vitamin D3-signaling, often dimerizes with RXR-alpha |       |    |               |                                                               |     |   |                 |                                                            |       |    |   |
| V\$VDR_Q3        |                                                                                   | 14    | 0  | V\$RHOX11_01  | Rhox11                                                        | 0   | 1 | V\$E2F4DP1_01   | E2F-4:DP-1 heterodimer                                     | 13    | 0  |   |
| MA0143.1         | Sox2                                                                              | 13    | 0  | V\$RP58_01    | 58 KDA repressor protein                                      | 0   | 1 | V\$FOXP3_01     | forkhead box P3                                            | 13    | 0  |   |

|                         |                                                                        |    |   |               |                                                                   |   |   |                                      |                                                                              |    |   |
|-------------------------|------------------------------------------------------------------------|----|---|---------------|-------------------------------------------------------------------|---|---|--------------------------------------|------------------------------------------------------------------------------|----|---|
| MA0157.1                | FOXO3<br>activating<br>transcription factor 3                          | 13 | 0 | V\$RREB1_01   | Ras-responsive<br>element binding<br>protein 1                    | 0 | 1 | V\$GABP_B                            | GA binding protein                                                           | 13 | 0 |
| V\$ATF3_Q6              |                                                                        | 13 | 0 | V\$RXRLXRB_01 | RXR:LXR-beta<br>Consensus SATB1<br>Binding Sequence               | 0 | 1 | V\$IRF8_Q6                           | IRF8                                                                         | 13 | 0 |
| V\$BRN2_01              | POU factor Brn-2                                                       | 13 | 0 | V\$SATB1_01   |                                                                   | 0 | 1 | V\$MAF_Q6                            | MAF<br>nuclear factor Y (Y-<br>box binding factor)                           | 13 | 0 |
| V\$HNF3ALPHA_Q6         | HNF3alpha                                                              | 13 | 0 | V\$SOX4_01    | SOX4                                                              | 0 | 1 | V\$NFY_01<br>V\$P50RELAP65_Q5<br>_01 | P50:RELA-P65                                                                 | 13 | 0 |
| V\$OBOX1_01             | Obox1                                                                  | 13 | 0 | V\$SP1SP3_Q4  | SP1:SP3<br>Se-Cys tRNA gene<br>transcription<br>activating factor | 0 | 1 | V\$SP3_Q3                            | Sp3                                                                          | 13 | 0 |
| V\$OTX3_01              | Otx3                                                                   | 13 | 0 | V\$STAF_02    |                                                                   | 0 | 1 | V\$ZBED6_01                          | ZBED6                                                                        | 13 | 0 |
| V\$NURR1_Q3             | NURR1<br>activating<br>transcription factor 4                          | 13 | 1 | V\$TBX5_01    | TBX5                                                              | 0 | 1 | MA0031.1                             | FOXD1                                                                        | 12 | 0 |
| V\$ATF4_Q2              |                                                                        | 12 | 0 | V\$WT1_Q6     | WT1<br>zinc finger protein of<br>the cerebellum 2                 | 0 | 1 | MA0041.1                             | Foxd3                                                                        | 12 | 0 |
| V\$FOXO3A_Q1            | FOXO3A                                                                 | 12 | 0 | V\$ZIC2_01    |                                                                   | 0 | 1 | MA0048.1                             | NHLH1                                                                        | 12 | 0 |
| V\$HSF_Q6               | HSF                                                                    | 12 | 0 | MA0027.1      | En1                                                               | 0 | 2 | MA0107.1                             | RELA<br>cAMP-responsive<br>element binding<br>protein<br>CRE-binding protein | 12 | 0 |
| V\$KLF15_Q2             | KLF15                                                                  | 12 | 0 | MA0040.1      | Foxq1                                                             | 0 | 2 | V\$CREB_01                           | 1:c-Jun heterodimer                                                          | 12 | 0 |
| V\$LEF1TCF1_Q4          | LEF1, TCF1                                                             | 12 | 0 | MA0140.1      | Tal1::Gata1                                                       | 0 | 2 | V\$CREBP1CJUN_01                     |                                                                              | 12 | 0 |
| V\$NKX25_03             | NKX25<br>X-box binding protein                                         | 12 | 0 | V\$CDX1_01    | Cdx-1                                                             | 0 | 2 | V\$FOX_Q2                            | FOX factors                                                                  | 12 | 0 |
| V\$RFX1_02              | RFX1                                                                   | 12 | 0 | V\$CDX2_01    | Cdx-2                                                             | 0 | 2 | V\$FREAC3_01                         | Fork head Related<br>ACTivator-3<br>glucocorticoid<br>receptor               | 12 | 0 |
| MA0039.2                | Klf4                                                                   | 11 | 0 | V\$DEC_Q1     | DEC                                                               | 0 | 2 | V\$GR_Q6                             | NF-kappaB (p65)<br>CIZ (Cas-associated<br>zinc finger protein)               | 12 | 0 |
| MA0164.1                | Nr2e3                                                                  | 11 | 0 | V\$DLX3_01    | dlx3                                                              | 0 | 2 | V\$NFKAPPAB65_01                     | E2F-1:DP-1<br>heterodimer                                                    | 12 | 0 |
| V\$COUP_DR1_Q6          | COUP direct repeat 1                                                   | 11 | 0 | V\$DMRT2_01   | DMRT2                                                             | 0 | 2 | V\$CIZ_01                            | E2F-4:DP-2<br>heterodimer                                                    | 11 | 0 |
| V\$DLX5_01              | dlx5                                                                   | 11 | 0 | V\$FOXO3_01   | fork head box O3                                                  | 0 | 2 | V\$E2F1DP1_01                        |                                                                              | 11 | 0 |
| V\$HB9_01               | HB9                                                                    | 11 | 0 | V\$GATA1_03   | GATA-binding factor 1                                             | 0 | 2 | V\$E2F4DP2_01                        |                                                                              | 11 | 0 |
| V\$HSF1_Q6              | HSF1<br>Sox2-Oct4 joint motif,<br>in silico predicted                  | 11 | 0 | V\$GCM_Q2     | GCM                                                               | 0 | 2 | V\$SOX5_01                           | Sox-5                                                                        | 11 | 0 |
| V\$OCT4_01              |                                                                        | 11 | 0 | V\$GLI1_01    | GLI1                                                              | 0 | 2 | V\$KID3_01                           | Kid3                                                                         | 11 | 1 |
| V\$SMAD_Q6              | SMAD                                                                   | 11 | 1 | V\$GLI2_01    | GLI2                                                              | 0 | 2 | MA0051.1                             | IRF2                                                                         | 10 | 0 |
| V\$CACBINDINGPROTEIN_Q6 | CAC-binding protein<br>cAMP-responsive<br>element binding<br>protein 1 | 11 | 3 | V\$HNF3_01    | HNF-3/Fkh Homolog-<br>8                                           | 0 | 2 | V\$AFP1_Q6                           | AFP1<br>BRCA1 containing<br>protein complex with<br>USF2                     | 10 | 0 |
| V\$CREBP1_01            |                                                                        | 10 | 0 | V\$HIF1_Q5    | hypoxia-inducible<br>factor 1                                     | 0 | 2 | V\$BRCA_01                           |                                                                              | 10 | 0 |
| V\$GLI3_01              | GLI3                                                                   | 10 | 0 | V\$HOXA11_01  | HOXA11                                                            | 0 | 2 |                                      |                                                                              | 10 | 0 |

|                     |                                                           |    |   |                 |                                       |   |   |                          |                                                                                   |    |   |
|---------------------|-----------------------------------------------------------|----|---|-----------------|---------------------------------------|---|---|--------------------------|-----------------------------------------------------------------------------------|----|---|
| V\$HP1SITEFACTOR_Q6 | HP1 site factor                                           | 10 | 0 | V\$HOXB9_01     | HOXB9                                 | 0 | 2 | V\$CACCCBINDINGFACTOR_Q6 | CACCC-binding factor cAMP-responsive element binding protein 1                    | 10 | 0 |
| V\$OCT_C            | Octamer binding site related to serum response factor, C4 | 10 | 0 | V\$HOXC10_01    | HOXC10                                | 0 | 2 | V\$CREBP1_01             | CREB1                                                                             | 10 | 0 |
| V\$RSRFC4_01        | RSRFC4                                                    | 10 | 0 | V\$NKX29_01     | Nkx2-9                                | 0 | 2 | V\$LTF_Q6                | LTF                                                                               | 10 | 0 |
| V\$SP1SP3_Q4        | SP1:SP3                                                   | 10 | 0 | V\$OBOX2_01     | Obox2                                 | 0 | 2 | V\$PAX8_B                | Pax-8 binding sites                                                               | 10 | 0 |
| V\$TAL1BETA47_01    | Tal-1beta:E47 heterodimer                                 | 10 | 0 | V\$RNF96_01     | RNF96                                 | 0 | 2 | V\$RELB_Q6               | kappaB site                                                                       | 10 | 0 |
| MA0112.2            | ESR1                                                      | 10 | 1 | V\$RORA1_01     | RAR-related orphan receptor alpha1    | 0 | 2 | V\$SMAD3_Q6              | SMAD3                                                                             | 10 | 0 |
| V\$PPARA_Q6         | half-site                                                 | 10 | 1 | V\$RSRFC4_01    | related to serum response factor, C4  | 0 | 2 | V\$VDR_Q3                | vitamin D receptor; mediates vitamin D3-signaling, often dimerizes with RXR-alpha | 10 | 0 |
| MA0052.1            | MEF2A                                                     | 9  | 0 | V\$SREBP_Q6     | SREBP                                 | 0 | 2 | MA0030.1                 | FOXF2                                                                             | 9  | 0 |
| MA0062.2            | GABPA                                                     | 9  | 0 | V\$SZF1_01      | SZF1-1                                | 0 | 2 | MA0038.1                 | Gfi                                                                               | 9  | 0 |
| V\$CEBPDELTA_Q6     | C/EBPdelta                                                | 9  | 0 | V\$YY1_02       | Yin and Yang 1                        | 0 | 2 | MA0057.1                 | MZF1_5-13                                                                         | 9  | 0 |
| V\$EGR_Q6           | Egr                                                       | 9  | 0 | V\$ZNF219_01    | ZNF219                                | 0 | 2 | MA0125.1                 | Nobox                                                                             | 9  | 0 |
| V\$HELIOSA_02       | Helios A                                                  | 9  | 0 | MA0052.1        | MEF2A                                 | 0 | 3 | MA0142.1                 | Pou5f1                                                                            | 9  | 0 |
| V\$HEN1_02          | HEN1                                                      | 9  | 0 | MA0131.1        | MIZF                                  | 0 | 3 | V\$E2F1DP2_01            | E2F-1:DP-2 heterodimer                                                            | 9  | 0 |
| V\$HMEF2_Q6         | myocyte enhancer factor                                   | 9  | 0 | MA0163.1        | PLAG1                                 | 0 | 3 | V\$HFH3_01               | HFH-3 (HNF3/fork head homolog 3)                                                  | 9  | 0 |
| V\$IK3_01           | Ikaros 3                                                  | 9  | 0 | V\$AIRE_01      | AIRE                                  | 0 | 3 | V\$HFH8_01               | HNF-3/Fkh Homolog-8                                                               | 9  | 0 |
| V\$KROX_Q6          | KROX                                                      | 9  | 0 | V\$CDC5_01      | cell division control protein 5       | 0 | 3 | V\$MAZR_01               | MAZ related factor                                                                | 9  | 0 |
| V\$MOVOB_01         | MOV0-B                                                    | 9  | 0 | V\$CDX_Q5       | Cdx                                   | 0 | 3 | V\$OTX_Q1                | OTX                                                                               | 9  | 0 |
| V\$ZFP206_01        | Zfp206                                                    | 9  | 0 | V\$CEBPGAMMA_Q6 | C/EBPgamma                            | 0 | 3 | V\$PLZF_Q2               | PLZF                                                                              | 9  | 0 |
| V\$PUR1_Q4          | PUR1                                                      | 9  | 9 | V\$COUPTF_Q6    | COUPTF                                | 0 | 3 | V\$POU1F1_Q6             | POU1F1                                                                            | 9  | 0 |
| MA0017.1            | NR2F1                                                     | 8  | 0 | V\$FAC1_01      | fetal Alz-50 clone 1                  | 0 | 3 | V\$STAT5B_Q1             | signal transducer and activator of transcription 5b                               | 9  | 0 |
| MA0155.1            | INSM1                                                     | 8  | 0 | V\$HIC1_Q3      | HIC1                                  | 0 | 3 | V\$MAFA_Q4_Q1            | MAFA                                                                              | 9  | 1 |
| V\$CEBPGAMMA_Q6     | C/EBPgamma                                                | 8  | 0 | V\$MOVOB_01     | MOV0-B modulator recognition factor 2 | 0 | 3 | V\$TTF1_Q6               | TTF-1 (Nkx2-1)                                                                    | 9  | 1 |
| V\$GFI1B_Q1         | Gfi1b                                                     | 8  | 0 | V\$MRF2_Q1      | MRF2                                  | 0 | 3 | MA0002.2                 | RUNX1                                                                             | 8  | 0 |
| V\$GSC_Q1           | Gsc                                                       | 8  | 0 | V\$OBOX1_01     | Obox1                                 | 0 | 3 | MA0047.2                 | Foxa2                                                                             | 8  | 0 |
| V\$HFH1_Q1          | HNF-3/Fkh Homolog 1                                       | 8  | 0 | V\$PITX3_Q1     | Pitx3                                 | 0 | 3 | MA0061.1                 | NF-kappaB                                                                         | 8  | 0 |
| V\$ISX_Q1           | isx                                                       | 8  | 0 | V\$SIRT6_Q1     | SIRT6                                 | 0 | 3 | MA0076.1                 | ELK4                                                                              | 8  | 0 |
| V\$STAT3_Q3         | STAT3:STAT3                                               | 8  | 0 | V\$TBR2_Q1      | TBR2                                  | 0 | 3 | MA0145.1                 | Tcfcp2l1                                                                          | 8  | 0 |
| V\$TAL1BETAITF2_01  | Tal-1beta:ITF-2 heterodimer                               | 8  | 0 | V\$TCF3_Q1      | TCF-3                                 | 0 | 3 | V\$DR1_Q3                | Direct repeat 1                                                                   | 8  | 0 |

|               |                                                |   |    |                |                                               |   |   |                   |                                             |   |   |
|---------------|------------------------------------------------|---|----|----------------|-----------------------------------------------|---|---|-------------------|---------------------------------------------|---|---|
| V\$TITF1_Q3   | TTF-1, TITF1 (thyroid transcription factor 1)  | 8 | 0  | V\$TERALPHA_Q6 | TERALPHA                                      | 0 | 3 | V\$HSF1_Q6        | HSF1                                        | 8 | 0 |
| MA0051.1      | IRF2                                           | 7 | 0  | V\$ZFX_01      | Zfx                                           | 0 | 3 | MA0114.1          | HNF4A                                       | 7 | 0 |
| MA0159.1      | RXR::RAR_DR5 Fork head RElated ACTivator-7     | 7 | 0  | V\$ZIC3_01     | zinc finger protein of the cerebellum 3       | 0 | 3 | MA0148.1          | FOXA1                                       | 7 | 0 |
| V\$FREAC7_01  |                                                | 7 | 0  | MA0063.1       | Nkx2-5                                        | 0 | 4 | V\$EHF_01         | EHF                                         | 7 | 0 |
| V\$GABP_B     | GA binding protein                             | 7 | 0  | MA0124.1       | NKX3-1                                        | 0 | 4 | V\$OCT_C          | Octamer binding site                        | 7 | 0 |
| V\$HOXA13_02  | HOXA13                                         | 7 | 0  | V\$AHRARNT_01  | aryl hydrocarbon receptor:Arnt heterodimers   | 0 | 4 | V\$OLF1_01        | olfactory neuron-specific factor            | 7 | 0 |
| V\$IRF8_Q6    | IRF8                                           | 7 | 0  | V\$CDPCR3HD_01 | cut-like homeodomain protein                  | 0 | 4 | V\$POU3F2_02      | POU3F2                                      | 7 | 0 |
| V\$IRX4_01    | IRX4                                           | 7 | 0  | V\$CHOP_01     | heterodimers of CHOP and C/EBPalpha           | 0 | 4 | V\$PPARG_Q6       | half-site                                   | 7 | 0 |
| V\$LRH1_Q5    | LRH1                                           | 7 | 0  | V\$EGR_Q6      | Egr                                           | 0 | 4 | V\$RBPJK_Q4       | RBP-Jkappa                                  | 7 | 0 |
| V\$NKX11_01   | Nkx1-1                                         | 7 | 0  | V\$FOX_Q2      | FOX factors                                   | 0 | 4 | V\$STAT3STAT3_Q3  | STAT3:STAT3                                 | 7 | 0 |
| V\$TBP_01     | TATA binding protein                           | 7 | 0  | V\$GATA4_Q3    | GATA-4                                        | 0 | 4 | V\$TAL1BETAE47_01 | Tal-1beta:E47 heterodimer                   | 7 | 0 |
| MA0133.1      | BRCA1                                          | 7 | 1  | V\$GZF1_01     | plays a role in renal branching morphogenesis | 0 | 4 | V\$TFEB_01        | TFEB                                        | 7 | 0 |
| V\$TCF3_01    | TCF-3                                          | 7 | 2  | V\$HNF6_Q6     | HNF6                                          | 0 | 4 | V\$SREBP2_Q6      | SREBP2                                      | 7 | 3 |
| MA0059.1      | MYC::MAX                                       | 6 | 0  | V\$HOXA10_01   | HOXA10                                        | 0 | 4 | MA0042.1          | FOXI1                                       | 6 | 0 |
| MA0093.1      | USF1                                           | 6 | 0  | V\$HOXA7_01    | HOXA7                                         | 0 | 4 | MA0065.2          | PPARG::RXRA                                 | 6 | 0 |
| I\$ANTP_Q6_01 | Antp cAMP-responsive element binding protein   | 6 | 0  | V\$HOXC11_01   | HOXC11                                        | 0 | 4 | MA0087.1          | Sox5                                        | 6 | 0 |
| V\$CREB_01    |                                                | 6 | 0  | V\$HOXD11_01   | HOXD11                                        | 0 | 4 | V\$CNOT3_01       | CNOT3                                       | 6 | 0 |
| V\$DOBOX4_01  | Dobox4                                         | 6 | 0  | V\$HOXD12_01   | HOXD12                                        | 0 | 4 | V\$DAX1_01        | Dax1                                        | 6 | 0 |
| V\$HOXA11_01  | HOXA11                                         | 6 | 0  | V\$OCTAMER_01  | Octamer                                       | 0 | 4 | V\$DMRT4_01       | DMRT4                                       | 6 | 0 |
| V\$IRX5_01    | Irx5                                           | 6 | 0  | V\$REX1_02     | REX1                                          | 0 | 4 | V\$ER_Q6_02       | half-site matrix, half-ERE                  | 6 | 0 |
| V\$LEF1_Q2_01 | LEF1                                           | 6 | 0  | MA0035.2       | Gata1 cut-like homeodomain protein            | 0 | 5 | V\$IK1_01         | Ikaros 1                                    | 6 | 0 |
| V\$MAX_01     | Max                                            | 6 | 0  | V\$CDPCR3_01   |                                               | 0 | 5 | V\$KAISO_01       | KAISO                                       | 6 | 0 |
| V\$MYCMAX_01  | c-Myc:Max heterodimer                          | 6 | 0  | V\$DMRT3_01    | DMRT3                                         | 0 | 5 | V\$NFKAPPAB_01    | NF-kappaB                                   | 6 | 0 |
| V\$MYOGNF1_01 | myogenin / nuclear factor 1 or related factors | 6 | 0  | V\$HOMEZ_01    | Homez                                         | 0 | 5 | V\$SP2_01         | SP2                                         | 6 | 0 |
| MA0130.1      | ZNF354C                                        | 6 | 1  | V\$HOXC12_01   | HOXC12                                        | 0 | 5 | V\$TFIIA_Q6       | TFIIA                                       | 6 | 0 |
| MA0160.1      | NR4A2                                          | 6 | 1  | V\$SPZ1_01     | spermatogenic Zip                             | 0 | 5 | MA0150.1          | NFE2L2                                      | 5 | 0 |
| V\$LRF_Q2     | LRF                                            | 6 | 1  | V\$TATA_C      | Retroviral TATA box                           | 0 | 5 | V\$ALPHACP1_01    | alpha-CP1 activating transcription factor 3 | 5 | 0 |
| V\$RPC155_01  | RPC155                                         | 6 | 13 | MA0041.1       | Foxd3                                         | 0 | 6 | V\$ATF3_Q6        |                                             | 5 | 0 |
| MA0040.1      | Foxq1                                          | 5 | 0  | MA0146.1       | Zfx                                           | 0 | 6 | V\$CREBATF_Q6     | CREB, ATF                                   | 5 | 0 |

|                  |                                                                       |   |    |               |                                    |   |    |                    |                                                       |   |   |
|------------------|-----------------------------------------------------------------------|---|----|---------------|------------------------------------|---|----|--------------------|-------------------------------------------------------|---|---|
| MA0087.1         | Sox5                                                                  | 5 | 0  | V\$ETF_Q6     | ETF                                | 0 | 6  | V\$DR4_Q2          | direct repeat 4                                       | 5 | 0 |
| MA0105.1         | NFKB1                                                                 | 5 | 0  | V\$FOXJ2_01   | fork head box J 2                  | 0 | 6  | V\$FOXJ3_01        | foxj3                                                 | 5 | 0 |
| MA0142.1         | Pou5f1                                                                | 5 | 0  | V\$FOXJ3_01   | foxj3                              | 0 | 6  | V\$HNF4_01         | hepatic nuclear factor 4                              | 5 | 0 |
| V\$CMYC_02       | c-Myc heterodimer (with a 26-29 kDa factor)                           | 5 | 0  | V\$GATA2_03   | GATA-binding factor 2              | 0 | 6  | V\$NRF1_Q6         | nuclear respiratory factor 1                          | 5 | 0 |
| V\$FREAC3_01     | Fork head RElated ACTivator-3                                         | 5 | 0  | V\$HFH3_01    | HFH-3 (HNF3/fork head homolog 3)   | 0 | 6  | V\$P50P50_Q3       | P50:P50                                               | 5 | 0 |
| V\$HBP1_Q2       | hbp1                                                                  | 5 | 0  | V\$NKX3A_01   | NK class homeobox factor 3A        | 0 | 6  | V\$REX1_03         | REX1                                                  | 5 | 0 |
| V\$HNF4ALPHA_Q6  | HNF4alpha                                                             | 5 | 0  | V\$HMGA2_01   | HMGA2 binding site                 | 0 | 6  | V\$TAL1BETAITF2_01 | Tal-1beta:ITF-2 heterodimer                           | 5 | 0 |
| V\$HOXC11_01     | HOXC11                                                                | 5 | 0  | V\$AHR_01     | aryl hydrocarbon / dioxin receptor | 0 | 7  | V\$EBOX_Q6_01      | Ebox                                                  | 5 | 1 |
| V\$MAZR_01       | MAZ related factor                                                    | 5 | 0  | V\$FOXP1_01   | FOXP1                              | 0 | 7  | V\$MTF1_02         | MTF1                                                  | 5 | 1 |
| V\$NFKAPPAB50_01 | NF-kappaB (p50) high affinity binding sites for progesterone receptor | 5 | 0  | V\$HOXA13_03  | HOXA13                             | 0 | 7  | V\$NURR1_Q3        | NURR1                                                 | 5 | 1 |
| V\$PR_01         | REX1                                                                  | 5 | 0  | MA0108.2      | TBP                                | 0 | 8  | V\$BRF1_01         | BRF-1                                                 | 5 | 2 |
| V\$REX1_03       | REX1                                                                  | 5 | 0  | I\$ANTP_Q6_01 | Antp cut-like homeodomain protein  | 0 | 8  | MA0025.1           | NFIL3                                                 | 4 | 0 |
| V\$SF1_Q6        | SF1                                                                   | 5 | 0  | V\$CDPCR1_01  | CDPCR1                             | 0 | 8  | MA0104.2           | Mycn                                                  | 4 | 0 |
| MA0258.1         | ESR2                                                                  | 5 | 1  | V\$GATA_C     | GATA binding site                  | 0 | 9  | V\$CACD_01         | CACD                                                  | 4 | 0 |
| V\$CHCH_01       | Churchill                                                             | 5 | 1  | V\$HOXA9_01   | hoxa9                              | 0 | 9  | V\$CEBPE_01        | cebpe                                                 | 4 | 0 |
| MA0014.1         | Pax5                                                                  | 4 | 0  | V\$HOXB13_01  | HOXB13                             | 0 | 9  | V\$GATA3_03        | GATA-binding factor 3                                 | 4 | 0 |
| MA0031.1         | FOXO1                                                                 | 4 | 0  | V\$HOXC13_01  | HOXC13                             | 0 | 9  | V\$HFH4_01         | HFH4 (FOXJ1)                                          | 4 | 0 |
| MA0091.1         | TAL1::TCF3                                                            | 4 | 0  | V\$POU2F3_01  | POU2F3                             | 0 | 9  | V\$HNF3A_01        | FOXA1                                                 | 4 | 0 |
| MA0104.2         | Mycn                                                                  | 4 | 0  | MA0111.1      | Spz1                               | 0 | 10 | V\$HSF2_01         | heat shock factor 2                                   | 4 | 0 |
| V\$DMRT7_01      | DMRT7                                                                 | 4 | 0  | V\$CHCH_01    | Churchill                          | 0 | 10 | V\$MAX_01          | Max                                                   | 4 | 0 |
| V\$FOXJ3_01      | foxj3                                                                 | 4 | 0  | V\$GATA3_02   | GATA-binding factor 3              | 0 | 10 | V\$PEBP_Q6         | PEBP                                                  | 4 | 0 |
| V\$FXR_Q2        | half-site                                                             | 4 | 0  | V\$HOXD13_01  | HOXD13                             | 0 | 10 | V\$PR_01           | high affinity binding sites for progesterone receptor | 4 | 0 |
| V\$GATA4_Q3      | GATA-4                                                                | 4 | 0  | V\$LRF_Q2     | LRF                                | 0 | 10 | V\$RFX1_02         | X-box binding protein RFX1                            | 4 | 0 |
| V\$HNF6_Q6       | HNF6                                                                  | 4 | 0  | V\$BRF1_01    | BRF-1                              | 0 | 11 | V\$SMAD4_Q6        | SMAD4                                                 | 4 | 0 |
| V\$HOXC10_01     | HOXC10                                                                | 4 | 0  | V\$HOXD10_01  | HOXD10                             | 0 | 11 | V\$ZABC1_01        | ZABC1 b.s.                                            | 4 | 0 |
| V\$HOXC12_01     | HOXC12                                                                | 4 | 0  | MA0042.1      | FOXI1                              | 0 | 12 | V\$SMAD_Q6         | SMAD                                                  | 4 | 2 |
| V\$HOXD11_01     | HOXD11                                                                | 4 | 0  | V\$AHRHIF_Q6  | AhR, Arnt, HIF-1                   | 0 | 12 | MA0006.1           | Arnt::Ahr                                             | 3 | 0 |
| V\$HOXD12_01     | HOXD12                                                                | 4 | 0  | V\$DOBOX4_01  | Dobox4                             | 0 | 12 | MA0027.1           | En1                                                   | 3 | 0 |
| V\$IRX2_01       | Irx2                                                                  | 4 | 0  | V\$FOXO3A_Q1  | FOXO3A                             | 0 | 12 | MA0073.1           | RREB1                                                 | 3 | 0 |
| V\$PNR_01        | PNR                                                                   | 4 | 0  | V\$IK2_01     | Ikaros 2                           | 0 | 12 | MA0105.1           | NFKB1                                                 | 3 | 0 |
| V\$IK_Q5         | Ikaros                                                                | 4 | 15 | V\$GATA6_01   | GATA-6                             | 0 | 13 | V\$AIRE_01         | AIRE                                                  | 3 | 0 |



|                 |                                                          |   |    |               |                                                       |   |    |                       |                                                               |   |   |
|-----------------|----------------------------------------------------------|---|----|---------------|-------------------------------------------------------|---|----|-----------------------|---------------------------------------------------------------|---|---|
| MA0025.1        | NFIL3                                                    | 3 | 0  | V\$IRX4_01    | IRX4                                                  | 0 | 13 | V\$ATF1_Q6            | ATF1                                                          | 3 | 0 |
| V\$DR4_Q2       | direct repeat 4<br>Rb:E2F-1:DP-1                         | 3 | 0  | V\$LXR_DR4_Q3 | LXR direct repeat 4<br>Fork head RElated              | 0 | 13 | V\$ATF_B              | ATF binding site                                              | 3 | 0 |
| V\$E2F1DP1RB_01 | trimeric complex                                         | 3 | 0  | V\$FREAC7_01  | ACTivator-7                                           | 0 | 14 | V\$CHX10_01           | CHX10<br>c-Myc heterodimer<br>(with a 26-29 kDa<br>factor)    | 3 | 0 |
| V\$E2F4DP1_01   | E2F-4:DP-1<br>heterodimer                                | 3 | 0  | V\$IRX2_01    | Irx2                                                  | 0 | 14 | V\$CMYC_02            |                                                               | 3 | 0 |
| V\$ERG_01       | ERG                                                      | 3 | 0  | V\$IRX3_01    | Irx-3                                                 | 0 | 14 | V\$CP2_01             | CP2                                                           | 3 | 0 |
| V\$FREAC2_01    | Fork head RElated<br>ACTivator-2                         | 3 | 0  | V\$IRX5_01    | Irx5                                                  | 0 | 14 | V\$DMRT2_01           | DMRT2                                                         | 3 | 0 |
| V\$FREAC4_01    | Fork head RElated<br>ACTivator-4                         | 3 | 0  | V\$IRXB3_01   | IRXB3                                                 | 0 | 14 | V\$DMRT3_01           | DMRT3                                                         | 3 | 0 |
| V\$GRE_C        | Glucocorticoid<br>response element                       | 3 | 0  | V\$MEF2C_01   | MEF-2C                                                | 0 | 14 | V\$FOXP1_01           | FOXP1                                                         | 3 | 0 |
| V\$HFH8_01      | HNF-3/Fkh Homolog-<br>8                                  | 3 | 0  | V\$ZF5_01     | ZF5                                                   | 0 | 14 | V\$GATA_C             | GATA binding site                                             | 3 | 0 |
| V\$IRX3_01      | Irx-3                                                    | 3 | 0  | V\$CIZ_01     | CIZ (Cas-associated<br>zinc finger protein)           | 0 | 15 | V\$MECP2_02           | MECP2 b.s.                                                    | 3 | 0 |
| V\$IRXB3_01     | IRXB3                                                    | 3 | 0  | V\$SIX6_02    | Six-6<br>2 ERE half-sites with a<br>3bp spacer within | 0 | 15 | V\$MEIS1AHOXA9_0<br>1 | Meis-1a:HOXA9<br>heterodimeric binding                        | 3 | 0 |
| V\$LBP9_01      | LBP9 (Tcfcp211)                                          | 3 | 0  | V\$ERALPHA_01 |                                                       | 0 | 16 | V\$NUR77_Q5           | NUR77                                                         | 3 | 0 |
| V\$LHX8_01      | Lhx8                                                     | 3 | 0  | MA0019.1      | Ddit3::Cebpa                                          | 0 | 17 | V\$P300_01            | p300                                                          | 3 | 0 |
| V\$OBOX6_01     | Obox6                                                    | 3 | 0  | MA0032.1      | FOXC1                                                 | 0 | 17 | V\$RFX3_01            | RFX3 dimer                                                    | 3 | 0 |
| V\$POU1F1_Q6    | POU1F1<br>Ras-responsive<br>element binding<br>protein 1 | 3 | 0  | V\$AP3_Q6     | AP-3                                                  | 0 | 17 | V\$SRF_Q5_02          | SRF<br>Se-Cys tRNA gene<br>transcription<br>activating factor | 3 | 0 |
| V\$RREB1_01     |                                                          | 3 | 0  | V\$ING4_01    | ING4                                                  | 0 | 17 | V\$STAF_01            |                                                               | 3 | 0 |
| V\$RXRLXRB_01   | RXR:LXR-beta                                             | 3 | 0  | V\$SIX1_01    | Six-1                                                 | 0 | 17 | V\$STRA13_01          | Stra13<br>TCF11:MafG                                          | 3 | 0 |
| V\$TATA_C       | Retroviral TATA box                                      | 3 | 0  | V\$ZNF333_01  | ZNF333<br>apolipoprotein AI<br>regulatory protein 1   | 0 | 17 | V\$TCF11MAFG_01       | heterodimers                                                  | 3 | 0 |
| V\$DBP_Q6       | DBP                                                      | 3 | 3  | V\$ARP1_01    |                                                       | 0 | 18 | MA0103.1              | ZEB1                                                          | 3 | 1 |
| V\$LYF1_01      | LyF-1                                                    | 3 | 18 | V\$OTX2_Q3    | OTX2                                                  | 0 | 18 | V\$HIC1_02            | HIC1                                                          | 3 | 1 |
| MA0030.1        | FOXF2                                                    | 2 | 0  | V\$SIX2_01    | Six-2                                                 | 0 | 18 | MA0132.1              | Pdx1                                                          | 3 | 2 |
| MA0069.1        | Pax6                                                     | 2 | 0  | V\$SIX3_01    | Six-3                                                 | 0 | 18 | MA0017.1              | NR2F1                                                         | 2 | 0 |
| MA0116.1        | Zfp423                                                   | 2 | 0  | MA0109.1      | Hltf<br>HOXA3 (homeobox<br>cluster protein)           | 0 | 19 | MA0018.2              | CREB1                                                         | 2 | 0 |
| MA0125.1        | Nobox                                                    | 2 | 0  | V\$HOXA3_01   |                                                       | 0 | 19 | MA0035.2              | Gata1                                                         | 2 | 0 |
| MA0141.1        | Esrrb                                                    | 2 | 0  | V\$LUN1_01    | LUN-1                                                 | 0 | 19 | MA0069.1              | Pax6                                                          | 2 | 0 |
| V\$AFP1_Q6      | AFP1                                                     | 2 | 0  | V\$RUSH1A_Q2  | RUSH-1alpha                                           | 0 | 19 | MA0092.1              | Hand1::Tcf2a                                                  | 2 | 0 |
| V\$CACD_01      | CACD                                                     | 2 | 0  | V\$YY2        | YY2                                                   | 0 | 19 | MA0093.1              | USF1                                                          | 2 | 0 |
| V\$COMP1_01     | COMP1                                                    | 2 | 0  | V\$IK_Q5      | Ikaros                                                | 0 | 20 | MA0133.1              | BRCA1                                                         | 2 | 0 |
| V\$CRX_02       | Crx                                                      | 2 | 0  | V\$LYF1_01    | LyF-1                                                 | 0 | 21 | MA0140.1              | Tal1::Gata1                                                   | 2 | 0 |
| V\$E4BP4_01     | E4BP4                                                    | 2 | 0  | MA0033.1      | FOXL1                                                 | 0 | 22 | MA0155.1              | INSM1                                                         | 2 | 0 |
| V\$ERR2_01      | ERR2 (ESRRB)                                             | 2 | 0  | V\$HOXA4_Q2   | HOXA4                                                 | 0 | 22 | MA0164.1              | Nr2e3                                                         | 2 | 0 |

|              |                                                  |   |   |                |                             |   |    |                   |                                                           |   |   |
|--------------|--------------------------------------------------|---|---|----------------|-----------------------------|---|----|-------------------|-----------------------------------------------------------|---|---|
| V\$EVX2_01   | Evx2                                             | 2 | 0 | V\$BDP1_01     | BDP1                        | 0 | 23 | F\$AMT1_Q2        | AMT1                                                      | 2 | 0 |
| V\$FOXJ2_02  | fork head box J 2                                | 2 | 0 | V\$GTF2IRD1_01 | GTF2IRD1-isoform2           | 0 | 23 | V\$ARNT_02        | AhR nuclear translocator homodimers                       | 2 | 0 |
| V\$HSF2_03   | HSF2                                             | 2 | 0 | V\$PITX2_Q2    | pituitary homeobox factor 2 | 0 | 23 | V\$CEBPDELTA_Q6   | C/EBPdelta                                                | 2 | 0 |
| V\$PLZF_02   | PLZF                                             | 2 | 0 | V\$RPC155_01   | RPC155                      | 0 | 23 | V\$CMAF_02        | C-MAF                                                     | 2 | 0 |
| V\$ROAZ_01   | rat Olf-1/EBF-associated zinc finger protein     | 2 | 0 |                |                             |   |    | V\$COUP_01        | COUP-TF, HNF-4 Hand1:E47                                  | 2 | 0 |
| V\$SRF_02    | serum response factor                            | 2 | 0 |                |                             |   |    | V\$HAND1E47_01    | heterodimer                                               | 2 | 0 |
| V\$STAF_01   | Se-Cys tRNA gene transcription activating factor | 2 | 0 |                |                             |   |    | V\$HEN1_02        | HEN1                                                      | 2 | 0 |
| MA0057.1     | MZF1_5-13                                        | 2 | 1 |                |                             |   |    | V\$HTF_01         | HTF                                                       | 2 | 0 |
| V\$BRF1_01   | BRF-1                                            | 2 | 7 |                |                             |   |    | V\$LBP9_01        | LBP9 (Tcfcp211)                                           | 2 | 0 |
| MA0004.1     | Arnt                                             | 1 | 0 |                |                             |   |    | V\$LXR_Q3         | LXR                                                       | 2 | 0 |
| MA0006.1     | Arnt::Ahr                                        | 1 | 0 |                |                             |   |    | V\$MEIS1BHOXA9_02 | Meis-1b:HOXA9 heterodimeric binding modulator recognition | 2 | 0 |
| MA0007.1     | Ar                                               | 1 | 0 |                |                             |   |    | V\$MRF2_01        | factor 2 myogenin / nuclear factor 1 or related factors   | 2 | 0 |
| MA0115.1     | NR1H2::RXRA                                      | 1 | 0 |                |                             |   |    | V\$MYOGNF1_01     |                                                           | 2 | 0 |
| MA0147.1     | Myc                                              | 1 | 0 |                |                             |   |    | V\$NFKAPPAB50_01  | NF-kappaB (p50)                                           | 2 | 0 |
| MA0158.1     | HOXA5                                            | 1 | 0 |                |                             |   |    | V\$NMYC_01        | N-Myc                                                     | 2 | 0 |
| V\$ATF1_Q6   | ATF1                                             | 1 | 0 |                |                             |   |    | V\$PPAR_DR1_Q2    | PPAR direct repeat 1                                      | 2 | 0 |
| V\$ATF_B     | ATF binding site                                 | 1 | 0 |                |                             |   |    | V\$SAP1A_01       | SAP-1a                                                    | 2 | 0 |
| V\$BRCA_01   | BRCA1 containing protein complex with USF2       | 1 | 0 |                |                             |   |    | V\$WHN_B          | winged-helix factor nude                                  | 2 | 0 |
| V\$CDC5_01   | cell division control protein 5                  | 1 | 0 |                |                             |   |    | V\$XBP1_02        | XBP1                                                      | 2 | 0 |
| V\$DMRT4_01  | DMRT4                                            | 1 | 0 |                |                             |   |    | V\$YY1_01         | Yin and Yang 1                                            | 2 | 0 |
| V\$DR3_Q4    | direct repeat 3                                  | 1 | 0 |                |                             |   |    | V\$ZNF219_01      | ZNF219                                                    | 2 | 0 |
| V\$ETF_Q6    | ETF                                              | 1 | 0 |                |                             |   |    | V\$HMGA2_01       | HMGA2 binding site                                        | 2 | 0 |
| V\$HLF_01    | hepatic leukemia factor                          | 1 | 0 |                |                             |   |    | V\$DMRT1_01       | DMRT1                                                     | 2 | 1 |
| V\$ISL1_Q6   | ISL1                                             | 1 | 0 |                |                             |   |    | V\$GFI1B_01       | Gfi1b                                                     | 2 | 1 |
| V\$MIF1_01   | MIBP-1 / RFX1 complex                            | 1 | 0 |                |                             |   |    | V\$GKLF_02        | GKLF (KLF4)                                               | 2 | 1 |
| V\$NFMUE1_Q6 | NF-muE1                                          | 1 | 0 |                |                             |   |    | MA0124.1          | NKX3-1                                                    | 2 | 3 |
| V\$NRF1_Q6   | nuclear respiratory factor 1                     | 1 | 0 |                |                             |   |    | V\$SOX17_01       | half-site                                                 | 2 | 4 |
| V\$PAX3_01   | Pax-3 binding sites                              | 1 | 0 |                |                             |   |    | MA0004.1          | Arnt                                                      | 1 | 0 |

|                   |                                                                    |   |    |                         |                                                   |   |   |
|-------------------|--------------------------------------------------------------------|---|----|-------------------------|---------------------------------------------------|---|---|
| V\$POU3F2_01      | POU3F2                                                             | 1 | 0  | MA0007.1                | Ar                                                | 1 | 0 |
| V\$RORA2_01       | RAR-related orphan receptor alpha2                                 | 1 | 0  | MA0072.1                | RORA_2                                            | 1 | 0 |
| V\$RP58_01        | 58 KDA repressor protein                                           | 1 | 0  | MA0090.1                | TEAD1                                             | 1 | 0 |
| V\$RXRG_01        | RXRG dimer                                                         | 1 | 0  | MA0091.1                | TAL1::TCF3                                        | 1 | 0 |
| V\$SIX6_01        | Six-6                                                              | 1 | 0  | MA0117.1                | Mafb                                              | 1 | 0 |
| V\$SP2_01         | SP2                                                                | 1 | 0  | MA0141.1                | Esrrb                                             | 1 | 0 |
| V\$TAXCREB_02     | Tax/CREB complex                                                   | 1 | 0  | MA0159.1                | RXR::RAR_DR5                                      | 1 | 0 |
| V\$TFIIA_Q6       | TFIIA                                                              | 1 | 0  | V\$AML2_01              | AML2                                              | 1 | 0 |
| V\$XBP1_01        | X-box-binding protein 1                                            | 1 | 0  | V\$AML_Q6               | AML                                               | 1 | 0 |
| MA0071.1          | RORA_1                                                             | 1 | 1  | V\$CLOCKBMAL_Q6         | CLOCK:BMAL                                        | 1 | 0 |
| V\$FOX_Q2         | FOX factors                                                        | 1 | 1  | V\$COREBINDINGFACTOR_Q6 | core-binding factor                               | 1 | 0 |
| V\$FOXP1_01       | FOXP1                                                              | 1 | 1  | V\$DEAF1_01             | DEAF1                                             | 1 | 0 |
| MA0063.1          | Nkx2-5                                                             | 1 | 3  | V\$DMRT5_01             | DMRT5                                             | 1 | 0 |
| V\$HFH3_01        | HFH-3 (HNF3/fork head homolog 3)                                   | 1 | 3  | V\$E4BP4_01             | E4BP4                                             | 1 | 0 |
| V\$ZNF219_01      | ZNF219                                                             | 1 | 3  |                         | Egr-1/Krox-24/NGFI-A immediate-early gene product | 1 | 0 |
| V\$HMGA2_01       | HMGA2 binding site                                                 | 1 | 4  | V\$EGR1_01              |                                                   | 1 | 0 |
| MA0075.1          | Prrx2                                                              | 1 | 5  | V\$ERR2_01              | ERR2 (ESRRB)                                      | 1 | 0 |
| V\$BRACH_01       | Brachyury                                                          | 1 | 6  |                         | Fork head RElated Activator-4                     | 1 | 0 |
| V\$GATA1_07       | GATA-1                                                             | 1 | 11 | V\$FREAC4_01            |                                                   | 1 | 0 |
| MA0037.1          | GATA3                                                              | 1 | 21 | V\$GATA2_02             | GATA-binding factor 2                             | 1 | 0 |
| MA0131.1          | MIZF                                                               | 0 | 1  | V\$GATA6_01             | GATA-6                                            | 1 | 0 |
| V\$DMRT5_01       | DMRT5                                                              | 0 | 1  |                         | GCNF (germ cell nuclear factor)                   | 1 | 0 |
| V\$ERR1_Q2        | estrogen-related receptor alpha                                    | 0 | 1  | V\$GCNF_01              | Glucocorticoid response element                   | 1 | 0 |
| V\$GATA2_02       | GATA-binding factor 2                                              | 0 | 1  |                         | hepatic leukemia factor                           | 1 | 0 |
| V\$GKLF_02        | GKLF (KLF4)                                                        | 0 | 1  | V\$GRE_C                |                                                   | 1 | 0 |
| V\$LXR_Q3         | LXR                                                                | 0 | 1  | V\$HLF_01               |                                                   | 1 | 0 |
| V\$MEIS1BHOXA9_02 | Meis-1b:HOXA9 heterodimeric binding modulator recognition factor 2 | 0 | 1  | V\$LEF1_Q2_01           | LEF1                                              | 1 | 0 |
| V\$MRF2_01        |                                                                    | 0 | 1  | V\$LEF1TCF1_Q4          | LEF1, TCF1                                        | 1 | 0 |
| V\$P63_01         | p63                                                                | 0 | 1  | V\$LRH1_Q5              | LRH1                                              | 1 | 0 |
| V\$RNF96_01       | RNF96                                                              | 0 | 1  |                         | MIBP-1 / RFX1 complex                             | 1 | 0 |
|                   |                                                                    |   |    | V\$MIF1_01              |                                                   | 1 | 0 |
|                   |                                                                    |   |    | V\$MIZF_01              | MIZF                                              | 1 | 0 |
|                   |                                                                    |   |    |                         | c-Myc:Max heterodimer                             | 1 | 0 |
|                   |                                                                    |   |    | V\$MYCMAX_01            |                                                   | 1 | 0 |
|                   |                                                                    |   |    | V\$NF1_Q6_01            | NF-1                                              | 1 | 0 |
|                   |                                                                    |   |    | V\$PAX3_B               | Pax-3 binding sites                               | 1 | 0 |

|               |                                                 |   |   |               |                                                                           |   |   |
|---------------|-------------------------------------------------|---|---|---------------|---------------------------------------------------------------------------|---|---|
| V\$SIX3_01    | Six-3                                           | 0 | 1 | V\$PAX_Q6     | Pax                                                                       | 1 | 0 |
| V\$SOX17_01   | half-site                                       | 0 | 1 | V\$PPARA_01   | PPAR:RXR<br>heterodimers                                                  | 1 | 0 |
| V\$ZID_01     | zinc finger with<br>interaction domain          | 0 | 1 | V\$PXR_Q2     | half-site matrix                                                          | 1 | 0 |
| MA0029.1      | Evi1                                            | 0 | 2 | V\$TBX18_01   | T-box 18<br>PAR-type chicken<br>vitellogenin promoter-<br>binding protein | 1 | 0 |
| MA0041.1      | Foxd3                                           | 0 | 2 | V\$VBP_01     | ZBRK1                                                                     | 1 | 0 |
| MA0149.1      | EWSR1-FLI1                                      | 0 | 2 | V\$ZFX_01     | Zfx                                                                       | 1 | 0 |
| V\$COUPTF_Q6  | COUPTF                                          | 0 | 2 | MA0009.1      | T                                                                         | 1 | 1 |
| V\$DMRT1_01   | DMRT1                                           | 0 | 2 | MA0442.1      | SOX10                                                                     | 1 | 1 |
| V\$HIC1_02    | HIC1<br>hypoxia-inducible                       | 0 | 2 | V\$HBP1_Q2    | hbp1                                                                      | 1 | 1 |
| V\$HIF1_Q5    | factor 1                                        | 0 | 2 | V\$HES1_Q2    | HES1                                                                      | 1 | 1 |
| V\$PBX_Q3     | Pbx                                             | 0 | 2 | V\$PNR_01     | PNR<br>RAR-related orphan<br>receptor alpha2                              | 1 | 1 |
| V\$SIX2_01    | Six-2                                           | 0 | 2 | V\$RORA2_01   | ZNF333                                                                    | 1 | 1 |
| V\$TBX15_02   | T-box 15                                        | 0 | 2 | V\$ZNF333_01  | ZNF333                                                                    | 1 | 1 |
| V\$ZFX_01     | Zfx<br>aryl hydrocarbon<br>receptor:Arnt        | 0 | 2 | V\$COUPTF_Q6  | COUPTF                                                                    | 1 | 2 |
| V\$AHRARNT_01 | heterodimers<br>cut-like homeodomain<br>protein | 0 | 3 | V\$GLI3_Q5_01 | GLI3                                                                      | 1 | 2 |
| V\$CDPCR3_01  | DMRT3                                           | 0 | 3 | MA0033.1      | FOXL1                                                                     | 1 | 3 |
| V\$DMRT3_01   | DMRT3                                           | 0 | 3 | V\$FOXM1_01   | FOXM1                                                                     | 1 | 4 |
| V\$GATA_C     | GATA binding site                               | 0 | 3 | MA0112.2      | ESR1<br>aryl hydrocarbon /<br>dioxin receptor                             | 0 | 1 |
| V\$MTF1_Q4    | MTF-1                                           | 0 | 3 | V\$AHR_Q5     | aryl hydrocarbon<br>receptor:Arnt<br>heterodimers                         | 0 | 1 |
| MA0042.1      | FOXI1                                           | 0 | 4 | V\$AHRARNT_01 | heterodimers                                                              | 0 | 1 |
| MA0088.1      | znf143                                          | 0 | 4 | V\$FXR_IR1_Q6 | FXR inverted repeat 1                                                     | 0 | 1 |
| MA0132.1      | Pdx1                                            | 0 | 4 | V\$P63_01     | p63                                                                       | 0 | 1 |
| MA0163.1      | PLAG1                                           | 0 | 4 | V\$RORA_Q4    | RORalpha<br>58 KDA repressor<br>protein                                   | 0 | 1 |
| V\$HES1_Q2    | HES1                                            | 0 | 4 | V\$RPF58_01   | RXR:LXR-beta                                                              | 0 | 1 |
| V\$USF2_Q6    | USF2                                            | 0 | 4 | V\$RRLXRB_01  | spermatogenic Zip                                                         | 0 | 1 |
| V\$TFE_Q6     | TFE                                             | 0 | 5 | V\$SPZ1_01    | spermatogenic Zip                                                         | 0 | 1 |
| MA0078.1      | Sox17<br>plays a role in renal<br>branching     | 0 | 6 | V\$TEF1_Q6    | TEF-1<br>zinc finger protein<br>expressed in                              | 0 | 1 |
| V\$GZF1_01    | morphogenesis                                   | 0 | 6 | V\$ZEC_01     | zinc finger protein<br>expressed in                                       | 0 | 1 |
| MA0103.1      | ZEB1                                            | 0 | 7 |               |                                                                           |   |   |

|                |                                                                 |   |    |                |                                                                                                                            |   |   |
|----------------|-----------------------------------------------------------------|---|----|----------------|----------------------------------------------------------------------------------------------------------------------------|---|---|
| V\$FOXM1_01    | FOXM1                                                           | 0 | 7  | V\$ZID_01      | embryonal cells and certain adult organs zinc finger with interaction domain                                               | 0 | 1 |
| V\$GATA6_01    | GATA-6                                                          | 0 | 7  | MA0111.1       | Spz1                                                                                                                       | 0 | 2 |
| V\$SREBP1_Q5   | SREBP1                                                          | 0 | 7  | MA0119.1       | TLX1::NFIC                                                                                                                 | 0 | 2 |
| V\$ZIC3_01     | zinc finger protein of the cerebellum 3                         | 0 | 7  | MA0160.1       | NR4A2                                                                                                                      | 0 | 2 |
| MA0027.1       | En1                                                             | 0 | 8  | MA0258.1       | ESR2                                                                                                                       | 0 | 2 |
| V\$AHR_Q5      | aryl hydrocarbon / dioxin receptor cut-like homeodomain protein | 0 | 8  | V\$ATF4_Q2     | activating transcription factor 4 cut-like homeodomain protein                                                             | 0 | 2 |
| V\$CDPCR1_01   |                                                                 | 0 | 8  | V\$CDPCR3_01   | cut-like homeodomain protein                                                                                               | 0 | 2 |
| V\$DEC_Q1      | DEC                                                             | 0 | 8  | V\$CDPCR3HD_01 | selection of the binding sites for CTCF by HOX11 cooperative DNA binding [2] plays a role in renal branching morphogenesis | 0 | 2 |
| V\$TBX5_01     | TBX5                                                            | 0 | 8  | V\$CTF1_01     |                                                                                                                            | 0 | 2 |
| V\$ZIC1_01     | zinc finger protein of the cerebellum 1                         | 0 | 8  | V\$GZF1_01     |                                                                                                                            | 0 | 2 |
| V\$CIZ_01      | CIZ (Cas-associated zinc finger protein)                        | 0 | 10 | V\$ISL1_Q6     | ISL1                                                                                                                       | 0 | 2 |
| V\$GCM_Q2      | GCM                                                             | 0 | 10 | V\$PBX_Q3      | Pbx                                                                                                                        | 0 | 2 |
| V\$GLI2_01     | GLI2                                                            | 0 | 10 | V\$RXRG_01     | RXRG dimer                                                                                                                 | 0 | 2 |
| V\$MEF2C_01    | MEF-2C                                                          | 0 | 10 | V\$TBX5_01     | TBX5                                                                                                                       | 0 | 2 |
| V\$SPZ1_01     | spermatogenic Zip                                               | 0 | 10 | V\$USF2_Q6     | USF2                                                                                                                       | 0 | 2 |
| V\$SREBP_Q3    | SREBP                                                           | 0 | 10 | V\$ZIC3_01     | zinc finger protein of the cerebellum 3                                                                                    | 0 | 2 |
| V\$CHOP_01     | heterodimers of CHOP and C/EBPalpha                             | 0 | 11 | MA0146.1       | Zfx                                                                                                                        | 0 | 3 |
| V\$GLI1_01     | GLI1                                                            | 0 | 11 | MA0161.1       | NFIC                                                                                                                       | 0 | 3 |
| V\$CDPCR3HD_01 | cut-like homeodomain protein                                    | 0 | 12 | V\$AHRHIF_Q6   | AhR, Arnt, HIF-1                                                                                                           | 0 | 3 |
| V\$GLI_Q2      | GLI                                                             | 0 | 12 | V\$AP2REP_01   | AP-2 repressor                                                                                                             | 0 | 3 |
| MA0111.1       | Spz1                                                            | 0 | 13 | V\$ING4_01     | ING4                                                                                                                       | 0 | 3 |
| MA0124.1       | NKX3-1                                                          | 0 | 13 | V\$PLAG1_01    | PLAG1 binding site                                                                                                         | 0 | 3 |
| V\$TBR2_01     | TBR2                                                            | 0 | 14 | MA0088.1       | znf143                                                                                                                     | 0 | 4 |
| V\$TERALPHA_Q6 | TERALPHA                                                        | 0 | 14 | V\$CHOP_01     | heterodimers of CHOP and C/EBPalpha                                                                                        | 0 | 4 |
| V\$ZIC2_01     | zinc finger protein of the cerebellum 2                         | 0 | 14 | MA0130.1       | ZNF354C                                                                                                                    | 0 | 5 |
| MA0122.1       | Nkx3-2                                                          | 0 | 15 | V\$DEC_Q1      | DEC                                                                                                                        | 0 | 5 |
| MA0146.1       | Zfx                                                             | 0 | 16 | V\$GLI1_01     | GLI1                                                                                                                       | 0 | 5 |
| V\$PITX3_Q2    | PITX3                                                           | 0 | 19 | V\$GLI2_01     | GLI2                                                                                                                       | 0 | 5 |

|                |                                              |   |    |
|----------------|----------------------------------------------|---|----|
| MA0032.1       | FOXC1                                        | 0 | 21 |
| MA0033.1       | FOXL1                                        | 0 | 21 |
| V\$AHRHIF_Q6   | AhR, Arnt, HIF-1                             | 0 | 21 |
| V\$IK2_01      | Ikaros 2                                     | 0 | 21 |
| V\$ING4_01     | ING4                                         | 0 | 21 |
| V\$YY1_01      | Yin and Yang 1                               | 0 | 21 |
| V\$ZNF333_01   | ZNF333                                       | 0 | 21 |
| MA0019.1       | Ddit3::Cebpa                                 | 0 | 22 |
| V\$AP3_Q6      | AP-3                                         | 0 | 22 |
| V\$ARP1_01     | apolipoprotein AI<br>regulatory protein 1    | 0 | 22 |
| V\$DELTAEF1_01 | deltaEF1                                     | 0 | 22 |
| V\$LUN1_01     | LUN-1                                        | 0 | 22 |
| MA0109.1       | Hltf                                         | 0 | 23 |
| V\$BDP1_01     | BDP1                                         | 0 | 23 |
| V\$ERALPHA_01  | 2 ERE half-sites with a<br>3bp spacer within | 0 | 23 |
| V\$GTF2IRD1_01 | GTF2IRD1-isoform2                            | 0 | 23 |
| V\$RUSH1A_02   | RUSH-1alpha                                  | 0 | 23 |
| V\$YY2         | YY2                                          | 0 | 23 |

|                |                                              |   |    |
|----------------|----------------------------------------------|---|----|
| V\$OSF2_Q6     | Osf2                                         | 0 | 5  |
| V\$RORBETA_Q2  | RORBETA                                      | 0 | 5  |
| V\$TBR2_01     | TBR2                                         | 0 | 5  |
| V\$AML1_Q4     | AML1                                         | 0 | 6  |
| V\$GLI_Q2      | GLI                                          | 0 | 6  |
| V\$IK2_01      | Ikaros 2                                     | 0 | 6  |
| V\$ZIC1_01     | zinc finger protein of<br>the cerebellum 1   | 0 | 6  |
| MA0078.1       | Sox17                                        | 0 | 7  |
| V\$GCM_Q2      | GCM                                          | 0 | 8  |
| V\$SREBP_Q3    | SREBP                                        | 0 | 8  |
| V\$DBP_Q6      | DBP                                          | 0 | 9  |
| V\$SREBP1_Q6   | SREBP-1                                      | 0 | 9  |
| V\$AP3_Q6      | AP-3                                         | 0 | 10 |
| V\$MEF2C_01    | MEF-2C                                       | 0 | 10 |
| V\$ZIC2_01     | zinc finger protein of<br>the cerebellum 2   | 0 | 11 |
| V\$DELTAEF1_01 | deltaEF1                                     | 0 | 12 |
| V\$IK_Q5       | Ikaros                                       | 0 | 12 |
| V\$TERALPHA_Q6 | TERALPHA                                     | 0 | 16 |
| MA0109.1       | Hltf                                         | 0 | 17 |
| MA0122.1       | Nkx3-2                                       | 0 | 17 |
| V\$RUSH1A_02   | RUSH-1alpha                                  | 0 | 17 |
| MA0089.1       | NFE2L1::MafG                                 | 0 | 18 |
| V\$LYF1_01     | LyF-1                                        | 0 | 18 |
| MA0019.1       | Ddit3::Cebpa                                 | 0 | 20 |
| V\$BDP1_01     | BDP1                                         | 0 | 20 |
| V\$ERALPHA_01  | 2 ERE half-sites with a<br>3bp spacer within | 0 | 20 |
| V\$LUN1_01     | LUN-1                                        | 0 | 20 |
| MA0032.1       | FOXC1                                        | 0 | 21 |
| V\$ARP1_01     | apolipoprotein AI<br>regulatory protein 1    | 0 | 21 |
| V\$TFE_Q6      | TFE                                          | 0 | 21 |
| V\$GTF2IRD1_01 | GTF2IRD1-isoform2                            | 0 | 23 |
| V\$RPC155_01   | RPC155                                       | 0 | 23 |
| V\$YY2         | YY2                                          | 0 | 23 |
