# Supplementary material
Source: PubMed Central journal article supplement (PMC4076396)
Supplement: supp_113.110403_110403SupTabS5V2.pdf [file supp_113.110403_110403SupTabS5V2.pdf]

**Supplemental Table S5.** NCBI Refseq genes with a greater representation of promoter and coding region DHS in HEE and HTE cells than the five background cell types combined. (Expression levels from Nimblegen 4 x 60K gene expression microarray). DHS from the Hela S3 epithelial cell line instead of K562 were subtracted from this data set.

| Genes Shared (Sorted) |              |             |           |
|-----------------------|--------------|-------------|-----------|
| Gene Name             | Gene RefSeq  | Epid Exp    | TE Exp    |
| ACTBL2                | NM_001017992 | 8.069193333 | 6.83282   |
| ACVR2A                | NM_001616    | 8.730503333 | 9.401385  |
| ADAM28                | NM_021777    | 9.522073333 | 9.3238925 |
| ADAM7                 | NM_003817    | 6.09283     | 5.278945  |
| ADAMTS19              | NM_133638    | 4.163113333 | 5.032245  |
| ADAMTS20              | NM_025003    | 5.879003333 | 6.244205  |
| AK3                   | NM_016282    | 11.52997333 | 11.434975 |
| ANKK1                 | NM_178510    | 6.58015     | 7.37709   |
| ANKRD20A4             | NM_001098805 | *           | *         |
| ANXA8L2               | NM_001630    | 10.66552333 | 15.16625  |
| APLF                  | NM_173545    | 6.54479     | 6.401225  |
| AQP4                  | NM_004028    | 4.734376667 | 5.35759   |
| ART3                  | NM_001179    | 3.85165     | 5.018255  |
| ATF5                  | NM_012068    | 12.48236667 | 13.00015  |
| ATOH1                 | NM_005172    | 6.83708     | 9.01169   |
| ATP13A4               | NM_032279    | 5.27979     | 8.3504    |
| ATP13A5               | NM_198505    | 5.69588     | 7.21511   |
| BARX2                 | NM_003658    | 8.85065     | 10.142245 |
| BAZ2B                 | NM_013450    | 9.433616667 | 9.12264   |
| BMP2                  | NM_001200    | 9.834646667 | 7.632695  |
| BMPR1B                | NM_001203    | 10.42898667 | 9.983985  |
| C10orf113             | NM_001177483 | 4.716356667 | 5.08054   |
| C10orf57              | NM_025125    | 10.6564     | 11.099945 |
| C11orf65              | NM_152587    | 6.857273333 | 7.77869   |
| C11orf93              | NM_001136105 | 7.542083333 | 10.535725 |
| C12orf29              | NM_001009894 | 8.96963     | 9.548995  |
| C12orf39              | NM_030572    | 10.29660333 | 7.034685  |
| C13orf31              | NM_153218    | 9.10155     | 8.341395  |
| C14orf101             | NM_017799    | 11.63282667 | 11.44763  |
| C17orf77              | NM_152460    | 5.79319     | 6.07561   |
| C18orf62              | NM_001037331 | 9.889626667 | 8.113605  |
| C1QTNF7               | NM_031911    | 5.410456667 | 6.59393   |
| C2orf40               | NM_032411    | 5.505043333 | 5.403615  |
| C3orf30               | NM_152539    | 5.78657     | 8.332445  |
| C3orf63               | NM_015224    | 9.82459     | 9.49665   |

|          |              |             |           |
|----------|--------------|-------------|-----------|
| C4orf39  | NM_153027    | 5.94499     | 5.541275  |
| C5orf43  | NM_001048249 | 7.626503333 | 7.36838   |
| C6       | NM_001115131 | 6.61537     | 8.48318   |
| C6orf138 | NM_207499    | 9.338243333 | 7.875975  |
| C7       | NM_000587    | 4.50509     | 5.12205   |
| C9orf123 | NM_033428    | 8.842363333 | 8.179175  |
| CA3      | NM_005181    | 6.083006667 | 5.254765  |
| CALCB    | NM_000728    | 6.07011     | 6.654455  |
| CALCR    | NM_001742    | 4.266076667 | 4.984715  |
| CALCRL   | NM_005795    | 7.520716667 | 6.41602   |
| CCDC11   | NM_145020    | 6.082136667 | 7.445045  |
| CCDC66   | NM_001141947 | 9.52786     | 9.330405  |
| CCDC67   | NM_181645    | 4.486743333 | 6.81278   |
| CCNA1    | NM_003914    | 10.56602333 | 9.648305  |
| CCNG2    | NM_004354    | 12.53879667 | 13.09432  |
| CDH12    | NM_004061    | 4.360436667 | 5.65222   |
| CDH18    | NM_004934    | 6.319633333 | 5.482075  |
| CDS1     | NM_001263    | 9.424953333 | 11.728725 |
| CEACAM3  | NM_001815    | 9.43057     | 12.69175  |
| CGB5     | NM_033043    | 9.32702     | 8.901765  |
| CGGBP1   | NM_003663    | 11.65173667 | 11.569585 |
| CHL1     | NM_006614    | 10.50297667 | 9.53591   |
| CHST9    | NM_031422    | 9.395873333 | 8.67163   |
| CLCA4    | NM_012128    | 5.616803333 | 12.036785 |
| CLDN25   | NM_001101389 | 5.85886     | 7.26823   |
| CLEC18B  | NM_001011880 | 8.704683333 | 7.893225  |
| CNDP2    | NM_018235    | 14.15377667 | 10.54087  |
| CNTN1    | NM_175038    | 7.37438     | 8.073015  |
| COL21A1  | NM_030820    | 4.880486667 | 6.88939   |
| CPEB2    | NM_182646    | 9.55647     | 11.307885 |
| CRISPLD1 | NM_031461    | 7.406186667 | 6.207585  |
| CRYGD    | NM_006891    | 7.004726667 | 5.75637   |
| CSMD1    | NM_033225    | 6.88385     | 6.28079   |
| CST11    | NM_130794    | 6.17327     | 5.651845  |
| CWH43    | NM_025087    | 4.54235     | 6.313845  |
| CXCL1    | NM_001511    | 13.21966333 | 12.388935 |
| CXCL14   | NM_004887    | 7.81933     | 12.63403  |
| CXCL3    | NM_002090    | 11.10666667 | 8.24825   |
| CXorf22  | NM_152632    | 3.925833333 | 4.700705  |
| CXorf57  | NM_018015    | 5.256323333 | 7.88238   |
| CYP2J2   | NM_000775    | 8.61358     | 9.265115  |

|         |              |             |             |
|---------|--------------|-------------|-------------|
| CYP39A1 | NM_016593    | 7.496613333 | 6.24118     |
| CYP4B1  | NM_001099772 | 6.764783333 | 8.98142     |
| CYP4X1  | NM_178033    | 5.860453333 | 10.003795   |
| DAPL1   | NM_001017920 | 7.38351     | 9.17009     |
| DDIT4L  | NM_145244    | 10.41877667 | 7.164355    |
| DEFB110 | NM_001037728 | 4.42562     | 4.90197     |
| DEFB125 | NM_153325    | 7.41848     | 6.260385    |
| DEFB4A  | NM_004942    | 7.676706667 | 7.63967     |
| DENND2C | NM_198459    | 5.900953333 | 10.231145   |
| DIRAS2  | NM_017594    | 4.672206667 | 4.553535    |
| DNM1L   | NM_012063    | 12.62181667 | 12.11321667 |
| DPY19L2 | NM_173812    | 8.71714     | 6.107365    |
| DSC2    | NM_024422    | 10.06863    | 12.3417     |
| DSC3    | NM_024423    | 4.917396667 | 13.09876    |
| DSEL    | NM_032160    | 8.011056667 | 6.58966     |
| DSG3    | NM_001944    | 6.266193333 | 12.48767    |
| DYDC1   | NM_138812    | 4.651786667 | 5.902485    |
| DYDC2   | NM_032372    | 4.634616667 | 5.103495    |
| DYNLRB2 | NM_130897    | 5.68312     | 6.110545    |
| EDIL3   | NM_005711    | 11.744      | 8.241255    |
| EFCAB1  | NM_024593    | 6.05365     | 7.707335    |
| ELAVL2  | NM_004432    | 6.84502     | 5.700865    |
| ENPP5   | NM_021572    | 7.866266667 | 7.850805    |
| ENTPD3  | NM_001248    | 10.49581333 | 12.46067    |
| EPHA7   | NM_004440    | 7.388303333 | 5.10189     |
| ERP27   | NM_152321    | 6.11078     | 7.290685    |
| EYA1    | NM_172060    | 4.799046667 | 8.94867     |
| F8A3    | NM_001007524 | *           | *           |
| FAM110C | NM_001077710 | 10.41079667 | 9.94275     |
| FAM117B | NM_173511    | 8.077053333 | 7.6758      |
| FAM153C | NM_001079527 | *           | *           |
| FAM169A | NM_015566    | *           | *           |
| FAM183A | NM_001101376 | 4.980273333 | 9.03901     |
| FAM83B  | NM_001010872 | 10.27930667 | 10.261605   |
| FAM84A  | NM_145175    | 10.51916333 | 10.249965   |
| FBN2    | NM_001999    | 8.916773333 | 9.449785    |
| FBXO8   | NM_012180    | 7.260073333 | 7.62431     |
| FGF20   | NM_019851    | 3.466806667 | 4.305195    |
| FGF9    | NM_002010    | 10.81442667 | 6.54429     |
| FGFBP1  | NM_005130    | 11.26569    | 15.02352    |
| FGL1    | NM_201553    | 6.042663333 | 4.9983375   |

|           |              |             |             |
|-----------|--------------|-------------|-------------|
| FLRT2     | NM_013231    | 6.393956667 | 8.764455    |
| FOLH1     | NM_004476    | 7.617233333 | 8.6199675   |
| FOLH1B    | NM_153696    | 7.199763333 | 7.821425    |
| FREM2     | NM_207361    | 10.00802333 | 6.75432     |
| FZD6      | NM_003506    | 12.45606333 | 12.926045   |
| GABRG3    | NM_033223    | 5.587266667 | 7.616405    |
| GDA       | NM_004293    | 11.48084    | 7.19519     |
| GJA1      | NM_000165    | 12.31350667 | 12.821655   |
| GJB5      | NM_005268    | 6.72231     | 11.68649    |
| GPR111    | NM_153839    | 5.467583333 | 5.9745      |
| GRXCR1    | NM_001080476 | 5.888733333 | 6.37243     |
| GUCA1C    | NM_005459    | 5.8121      | 5.27306     |
| GUCY1A2   | NM_000855    | 7.48635     | 7.64223     |
| GYS2      | NM_021957    | 7.161156667 | 7.33584     |
| H2AFB3    | NM_080720    | *           | *           |
| HHIP      | NM_022475    | 9.794453333 | 4.88151     |
| HHLA2     | NM_007072    | 5.123023333 | 6.7911      |
| HIST1H2AG | NM_021064    | 6.47545     | 5.07573     |
| HIST1H2BJ | NM_021058    | 3.884056667 | 5.340975    |
| HLA-G     | NM_002127    | 9.8814      | 10.273635   |
| HMGB2     | NM_002129    | 8.727066667 | 8.28392     |
| HMGCLL1   | NM_019036    | 4.57281     | 4.50821     |
| HPGD      | NM_001145816 | 9.401013333 | 8.25736     |
| HRASLS    | NM_020386    | 8.909063333 | 9.05415     |
| HRG       | NM_000412    | 5.290763333 | 5.74779     |
| HTR1B     | NM_000863    | 6.56779     | 6.499335    |
| IFNK      | NM_020124    | 4.817246667 | 8.532695    |
| IFT57     | NM_018010    | 6.803266667 | 6.588315    |
| IL1F10    | NM_173161    | 9.28121     | 7.2233475   |
| IL1RAP    | NM_134470    | 8.428566667 | 8.244805    |
| INTS12    | NM_020395    | 11.16671333 | 12.01615    |
| IQCF1     | NM_152397    | 6.116106667 | 6.38671     |
| IRAK1BP1  | NM_001010844 | 9.606626667 | 6.357615    |
| KCNC2     | NM_153748    | 4.016113333 | 5.637091667 |
| KCNJ5     | NM_000890    | 7.506706667 | 10.83195    |
| KCNV1     | NM_014379    | 4.49178     | 5.02032     |
| KCTD4     | NM_198404    | 8.877496667 | 6.497035    |
| KHDRBS2   | NM_152688    | 4.784996667 | 5.40383     |
| KLRC1     | NM_213658    | 5.15463     | 5.336833333 |
| KLRC3     | NM_007333    | 4.40324     | 5.26202     |
| KLRK1     | NM_007360    | 5.378533333 | 5.032745    |

|           |              |             |            |
|-----------|--------------|-------------|------------|
| KRT24     | NM_019016    | 5.02987     | 10.709845  |
| KRT27     | NM_181537    | 4.50308     | 5.489855   |
| KRT31     | NM_002277    | 7.35927     | 9.941685   |
| KRT37     | NM_003770    | 6.92469     | 7.340675   |
| KRT5      | NM_000424    | 11.02139667 | 15.76723   |
| KRT6A     | NM_005554    | 10.36125333 | 15.748045  |
| KRT71     | NM_033448    | 7.64365     | 5.817405   |
| KRTAP2-4  | NM_033184    | 4.274023333 | 5.036965   |
| KRTAP4-7  | NM_033061    | 4.630396667 | 5.47453    |
| KRTAP4-9  | NM_001146041 | *           | *          |
| LINGO2    | NM_152570    | 7.6351      | 5.36444    |
| LMO3      | NM_018640    | 4.546366667 | 5.522015   |
| LOC389493 | NM_001145712 | *           | *          |
| LOC730755 | NM_001165252 | *           | *          |
| LPHN3     | NM_015236    | 10.91411333 | 5.347195   |
| LRAT      | NM_004744    | 6.60896     | 5.67938    |
| LRRC3B    | NM_052953    | 4.06671     | 4.808025   |
| LRRC66    | NM_001024611 | 6.800823333 | 7.04454    |
| LRRN1     | NM_020873    | 11.38233667 | 10.49871   |
| LYG2      | NM_175735    | 6.665983333 | 6.099285   |
| LYZL4     | NM_144634    | 6.859406667 | 7.261845   |
| MAEL      | NM_032858    | 7.005006667 | 5.741415   |
| MAGEE2    | NM_138703    | 6.819833333 | 6.45914    |
| MCM9      | NM_153255    | 5.967956667 | 7.131725   |
| MEP1A     | NM_005588    | 6.500013333 | 8.12878    |
| MFSD1     | NM_022736    | 11.55478333 | 12.3856    |
| MFSD6L    | NM_152599    | 7.97743     | 7.317695   |
| MGAM      | NM_004668    | 9.41074     | 8.230015   |
| MINA      | NM_153182    | 11.67571    | 11.2177725 |
| MOS       | NM_005372    | 5.013323333 | 5.87645    |
| MPPED2    | NM_001584    | 4.97484     | 5.406955   |
| MUM1L1    | NM_152423    | 5.078156667 | 5.728975   |
| NECAB1    | NM_022351    | 8.59323     | 6.43013    |
| NEDD1     | NM_152905    | 11.63934667 | 9.75054    |
| NEK3      | NM_001146099 | 10.22516333 | 9.25709    |
| NOX4      | NM_016931    | 8.545666667 | 5.69181    |
| NPFFR2    | NM_053036    | 10.25931    | 5.82842    |
| NUS1      | NM_138459    | 13.77609667 | 13.40878   |
| ODF2L     | NM_020729    | 9.949363333 | 8.956075   |
| OPRM1     | NM_001145287 | 6.31322     | 6.4375425  |
| OR52M1    | NM_001004137 | 8.596756667 | 7.77045    |

|          |              |             |             |
|----------|--------------|-------------|-------------|
| OSBPL6   | NM_145739    | 7.958546667 | 9.04609     |
| OXGR1    | NM_080818    | 3.722506667 | 4.63972     |
| PAPD4    | NM_173797    | 11.49856667 | 11.759015   |
| PCDH7    | NM_032457    | 6.637556667 | 8.401675    |
| PCDHAC2  | NM_031883    | 8.303953333 | 6.244135    |
| PCSK5    | NM_006200    | 13.94123667 | 10.31702    |
| PDCD5    | NM_004708    | 12.11428    | 12.993845   |
| PDPN     | NM_198389    | 12.48838667 | 13.89192    |
| PELI1    | NM_020651    | 9.488613333 | 9.087135    |
| PHYHIPL  | NM_032439    | 3.752473333 | 5.503185    |
| PIK3C2G  | NM_004570    | 5.739816667 | 5.719945    |
| PKP2     | NM_004572    | 9.912643333 | 12.287155   |
| PLBD1    | NM_024829    | 10.91702    | 12.27064    |
| PLCZ1    | NM_033123    | 4.065086667 | 4.90241     |
| PLS1     | NM_002670    | 11.09314    | 11.12484    |
| PRKCQ    | NM_006257    | 9.6798      | 8.85415     |
| PRRG4    | NM_024081    | 10.08126333 | 13.05982    |
| PRSS54   | NM_001080492 | 4.697146667 | 5.008025    |
| PTHLH    | NM_198966    | 11.73952333 | 14.96137833 |
| PTPRD    | NM_130393    | 12.39274667 | 7.6164      |
| PTPRZ1   | NM_002851    | 3.973356667 | 10.08715    |
| RAB32    | NM_006834    | 12.16122    | 11.582055   |
| RAB38    | NM_022337    | 10.41032333 | 13.197265   |
| RAD52    | NM_134424    | 9.410536667 | 9.02462     |
| RASGEF1B | NM_152545    | 7.42119     | 7.01997     |
| RASSF10  | NM_001080521 | 10.12547333 | 6.118145    |
| RBP2     | NM_004164    | 5.649246667 | 7.43861     |
| RFX7     | NM_022841    | 8.977626667 | 9.94161     |
| RGPD6    | NM_001123363 | *           | *           |
| RNF175   | NM_173662    | 7.468826667 | 8.343875    |
| RNF2     | NM_007212    | 7.24682     | 7.38139     |
| RNPC3    | NM_017619    | 10.94241333 | 11.771865   |
| RPE65    | NM_000329    | 3.769826667 | 5.0523      |
| RRM2B    | NM_015713    | 10.42678    | 11.203575   |
| S100A12  | NM_005621    | 5.039206667 | 8.409455    |
| SAP30    | NM_003864    | 9.924806667 | 9.965805    |
| SATB1    | NM_002971    | 7.68808     | 9.26758     |
| SCEL     | NM_144777    | 13.17517    | 14.0761     |
| SCGB2A1  | NM_002407    | 5.88642     | 5.913205    |
| SCN2A    | NM_021007    | 4.337046667 | 4.74905     |
| SCN3A    | NM_006922    | 3.8859      | 4.997805    |

|          |              |             |           |
|----------|--------------|-------------|-----------|
| SDR16C5  | NM_138969    | 5.452346667 | 10.178005 |
| SERF1A   | NM_022968    | 10.34925333 | 9.34901   |
| SERF1B   | NM_022978    | *           | *         |
| SERINC1  | NM_020755    | 12.90449333 | 12.256545 |
| SERPINB3 | NM_006919    | 8.31625     | 14.35049  |
| SERPINB4 | NM_002974    | 5.86783     | 12.94     |
| SERPINB7 | NM_003784    | 4.18119     | 13.010615 |
| SES3     | NM_144665    | 9.48257     | 11.97292  |
| SIPA1L2  | NM_020808    | 11.85162667 | 9.838925  |
| SIRPB2   | NM_001134836 | 6.947126667 | 9.707925  |
| SLC10A2  | NM_000452    | 5.8844      | 4.76383   |
| SLC12A2  | NM_001046    | 9.72207     | 10.243415 |
| SLC15A5  | NM_001170798 | *           | *         |
| SLC16A9  | NM_194298    | 6.782086667 | 9.98083   |
| SLC17A6  | NM_020346    | 3.870706667 | 4.922945  |
| SLC26A7  | NM_134266    | 5.34671     | 5.117265  |
| SLC29A4  | NM_153247    | 10.68930667 | 7.650645  |
| SLC35A5  | NM_017945    | 11.81831667 | 11.39886  |
| SLC5A1   | NM_000343    | 6.606013333 | 7.84092   |
| SLC5A7   | NM_021815    | 3.887013333 | 4.990015  |
| SLC6A15  | NM_182767    | 5.090433333 | 8.691775  |
| SLC6A8   | NM_005629    | 12.99914667 | 12.837425 |
| SLC7A3   | NM_032803    | 4.45648     | 5.488075  |
| SLITRK5  | NM_015567    | 6.24441     | 6.39942   |
| SLITRK6  | NM_032229    | 5.186656667 | 8.08181   |
| SLN      | NM_003063    | 9.97346     | 6.8363    |
| SMARCAD1 | NM_020159    | 8.6949      | 10.212175 |
| SNTG2    | NM_018968    | 5.470396667 | 6.87619   |
| SORCS3   | NM_014978    | 6.881363333 | 6.30426   |
| SOSTDC1  | NM_015464    | 11.40014667 | 6.827585  |
| SPCS3    | NM_021928    | 10.35608667 | 9.688255  |
| SPINK6   | NM_205841    | 3.74003     | 5.16761   |
| SPOCK3   | NM_016950    | 3.942303333 | 6.936455  |
| SRD5A2   | NM_000348    | 4.226886667 | 5.44109   |
| SSFA2    | NM_006751    | 12.34941333 | 12.520845 |
| SST      | NM_001048    | 8.951036667 | 7.180285  |
| ST6GAL2  | NM_032528    | 10.38855667 | 7.694645  |
| ST8SIA4  | NM_175052    | 7.2343      | 4.9830375 |
| STK32A   | NM_145001    | 4.240746667 | 7.28586   |
| SULT1E1  | NM_005420    | 7.054636667 | 8.46898   |
| SYCP2    | NM_014258    | 4.42777     | 5.469715  |

|           |              |             |            |
|-----------|--------------|-------------|------------|
| TAB2      | NM_015093    | 11.98417333 | 11.505655  |
| TAS2R14   | NM_023922    | 6.39324     | 6.62417    |
| TCEAL3    | NM_032926    | 12.24000333 | 12.0566075 |
| TDRD6     | NM_001168359 | 5.29416     | 7.252165   |
| TEDDM1    | NM_172000    | 4.831476667 | 5.401435   |
| TFCP2L1   | NM_014553    | 10.54521    | 12.22148   |
| TFPI2     | NM_006528    | 13.84152    | 11.590905  |
| TLL1      | NM_012464    | 7.53516     | 5.040215   |
| TMEM207   | NM_207316    | 3.908143333 | 5.591435   |
| TMPRSS11A | NM_182606    | 3.521186667 | 5.43044    |
| TMPRSS11E | NM_014058    | 5.089206667 | 13.11672   |
| TMPRSS11F | NM_207407    | 4.110846667 | 9.422205   |
| TOX3      | NM_001146188 | 10.49441333 | 7.84675    |
| TP53AIP1  | NM_022112    | 8.77534     | 9.63656    |
| TRIM68    | NM_018073    | 10.26056667 | 10.154115  |
| TRPC1     | NM_003304    | 8.003906667 | 7.78144    |
| TRPM3     | NM_206948    | 9.176156667 | 5.893175   |
| TTC29     | NM_031956    | 5.954533333 | 5.2574     |
| TUSC1     | NM_001004125 | 9.654203333 | 12.025205  |
| UCP1      | NM_021833    | 5.690673333 | 7.51818    |
| UFM1      | NM_016617    | 12.42937    | 13.11457   |
| UGT1A1    | NM_000463    | 13.31664667 | 13.983455  |
| UGT2B15   | NM_001076    | 12.19812333 | 7.08356    |
| UGT2B7    | NM_001074    | 10.94426667 | 5.777145   |
| UNC13C    | NM_001080534 | 3.746846667 | 4.35839    |
| UPK1B     | NM_006952    | 10.02635667 | 11.978865  |
| USP43     | NM_153210    | 10.41370333 | 9.86906    |
| USP51     | NM_201286    | 8.464683333 | 8.1052     |
| WDR43     | NM_015131    | 9.78363     | 11.20869   |
| WDR72     | NM_182758    | 10.69282    | 7.898405   |
| WIF1      | NM_007191    | 3.949286667 | 5.033465   |
| XAGE3     | NM_133179    | 7.947006667 | 6.59945    |
| YTHDC1    | NM_133370    | 13.18628333 | 13.32953   |
| ZBED2     | NM_024508    | 11.2449     | 11.90485   |
| ZFP2      | NM_030613    | 8.757306667 | 7.45263    |
| ZFP42     | NM_174900    | 9.20709     | 9.27113    |
| ZFP57     | NM_001109809 | 7.511043333 | 8.006545   |
| ZNF177    | NM_003451    | 8.094753333 | 8.4056     |
| ZNF22     | NM_006963    | 10.35192667 | 9.09407    |
| ZNF257    | NM_033468    | 9.086206667 | 6.435435   |
| ZNF347    | NM_032584    | 7.936873333 | 7.233375   |



|                                                                                              |              |             |          |
|----------------------------------------------------------------------------------------------|--------------|-------------|----------|
| ZNF433                                                                                       | NM_001080411 | 9.12931     | 8.671205 |
| ZNF470                                                                                       | NM_001001668 | 9.378056667 | 8.71214  |
| ZNF626                                                                                       | NM_145297    | 10.28107667 | 9.49131  |
| ZNF662                                                                                       | NM_207404    | 8.53554     | 8.97512  |
| ZNF879                                                                                       | NM_001136116 | *           | *        |
| ZP4                                                                                          | NM_021186    | 4.89231     | 6.037375 |
| *Probes for these genes are not included on the Nimblegen 4 x 60K gene expression microarray |              |             |          |
