# Supplementary material
Source: PubMed Central journal article supplement (PMC4076396)
Supplement: supp_113.110403_biolreprod.113.110403-1.pdf [file supp_113.110403_biolreprod.113.110403-1.pdf]

### Length distribution of DNase I hypersensitive sites

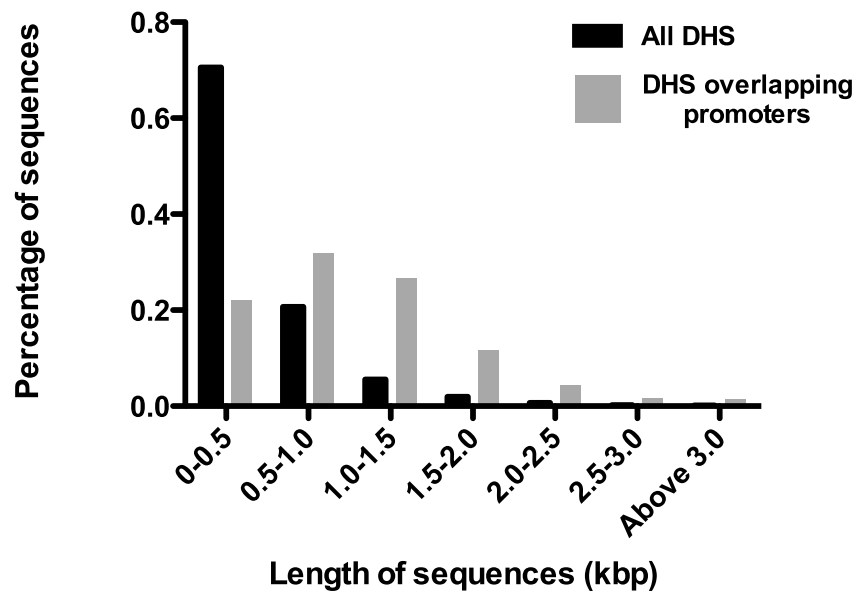

#### Supplementary Figure S1.

DHS at promoters are more extended than other sites. Length distribution of all HTE DHS compared to those that only overlap with gene promoters.
